# Supplementary material for: Association of internet use and health service utilization with self-rated health in middle-aged and older adults: findings from a nationally representative longitudinal survey
Source: Frontiers journal article supplement (doi:10.3389/fpubh.2024.1429983), 2024-10-03
Supplement: Data_Sheet_5.PDF [file Data_Sheet_5.PDF]

---

# CHINA HEALTH AND RETIREMENT LONGITUDINAL STUDY

## WAVE 5 (2020)

### CODEBOOK

---

VERSIONID: 20231106

Nov. 2023

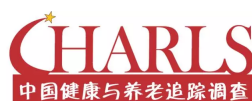

NATIONAL SCHOOL OF DEVELOPMENT  
INSTITUTE OF SOCIAL SCIENCE SURVEY  
PEKING UNIVERSITY

---

*This page intentionally left blank*

# Contents

|             |                                      |            |
|-------------|--------------------------------------|------------|
| <b>B</b>    | <b>Demographic Backgrounds</b>       | <b>1</b>   |
| <b>C</b>    | <b>Family Information</b>            | <b>9</b>   |
| <b>D</b>    | <b>Health Status and Functioning</b> | <b>115</b> |
| <b>F</b>    | <b>Work and Retirement</b>           | <b>237</b> |
| <b>G1</b>   | <b>Household Income</b>              | <b>259</b> |
| <b>G2</b>   | <b>Individual Income</b>             | <b>371</b> |
| <b>V</b>    | <b>COVID Module</b>                  | <b>397</b> |
| <b>EX</b>   | <b>Exit Module</b>                   | <b>413</b> |
| <b>AUX1</b> | <b>Sample Information</b>            | <b>559</b> |
| <b>AUX2</b> | <b>Sampling Weights</b>              | <b>561</b> |

*This page intentionally left blank*

## MODULE B

---

### Demographic Backgrounds

---

#### ID: Individual ID

| A String Variable |        |
|-------------------|--------|
| Obs:              | 19,395 |

#### householdID: Household ID

| A String Variable |        |
|-------------------|--------|
| Obs:              | 19,395 |

#### communityID: Community ID

| A String Variable |        |
|-------------------|--------|
| Obs:              | 19,395 |

#### proxy\_2: If Demographic Background Moduel Use Proxy Pattern

|       | Freq. | %      |
|-------|-------|--------|
| 1 Yes | 1,420 | 98.89  |
| 2 No  | 16    | 1.11   |
| Total | 1,436 | 100.00 |

#### ba001: Interviewer record R's gender

|          | Freq.  | %      |
|----------|--------|--------|
| 1 Male   | 9,090  | 46.87  |
| 2 Female | 10,305 | 53.13  |
| Total    | 19,395 | 100.00 |

#### ba002: Reconfirm Gender

|  | Freq. | % |
|--|-------|---|
|--|-------|---|

|          |    |        |
|----------|----|--------|
| 1 Male   | 24 | 55.81  |
| 2 Female | 19 | 44.19  |
| Total    | 43 | 100.00 |

**ba003\_1: What's your actual date of birth? Year**

| Mean     | SD   | Min      | Max      | Obs |
|----------|------|----------|----------|-----|
| 1,964.62 | 8.60 | 1,935.00 | 1,988.00 | 157 |

**ba003\_2: What's your actual date of birth? Month**

| Mean | SD   | Min   | Max   | Obs |
|------|------|-------|-------|-----|
| 5.76 | 4.03 | -1.00 | 12.00 | 157 |

**ba003\_3: What's your actual date of birth? Day**

| Mean  | SD    | Min   | Max   | Obs |
|-------|-------|-------|-------|-----|
| 13.62 | 10.00 | -1.00 | 31.00 | 157 |

**ba005: Type of Interview Address**

|                         | Freq.  | %      |
|-------------------------|--------|--------|
| 1 Family Housing        | 17,305 | 89.22  |
| 2 Workplace             | 1,214  | 6.26   |
| 3 Other, Please Specify | 876    | 4.52   |
| Total                   | 19,395 | 100.00 |

**ba006: What's Your Residential Address Now**

|                                              | Freq.  | %      |
|----------------------------------------------|--------|--------|
| 1 Address of Interview                       | 17,931 | 92.45  |
| 2 Not Address of Interview, Chinese Mainland | 1,454  | 7.50   |
| 3 Hong Kong, China                           | 2      | 0.01   |
| 4 Macao, China                               | 1      | 0.01   |
| 6 Abroad                                     | 7      | 0.04   |
| Total                                        | 19,395 | 100.00 |

**ba007: What's the Type of the Residential Address**

|                         | Freq. | %      |
|-------------------------|-------|--------|
| 1 Family Housing        | 2,017 | 76.06  |
| 2 Nursing home          | 49    | 1.85   |
| 3 Hospital              | 27    | 1.02   |
| 4 Other, Please Specify | 559   | 21.08  |
| Total                   | 2,652 | 100.00 |

**ba008: Was It Village or City/Town?**

|                                                                      | Freq.  | %      |
|----------------------------------------------------------------------|--------|--------|
| 1 City Center or Town Center                                         | 4,714  | 24.32  |
| 2 Combination Zone Between Urban and Rural Areas /<br>ZhenXiang Area | 2,377  | 12.26  |
| 3 Village                                                            | 12,270 | 63.30  |
| 4 Special Area                                                       | 24     | 0.12   |
| Total                                                                | 19,385 | 100.00 |

**ba009: Type of HuKou**

|                           | Freq.  | %      |
|---------------------------|--------|--------|
| 1 Agricultural HuKou      | 14,431 | 74.41  |
| 2 Non-Agricultural HuKou  | 2,913  | 15.02  |
| 3 Unified Residence HuKou | 2,040  | 10.52  |
| 4 Do not Have HuKou       | 11     | 0.06   |
| Total                     | 19,395 | 100.00 |

**ba010: What's the Highest Level of Education Now? Not Including Adult Education**

|                                            | Freq. | %      |
|--------------------------------------------|-------|--------|
| 1 No formal education (illiterate)         | 269   | 15.75  |
| 2 Did not finish primary school            | 334   | 19.56  |
| 3 Sishu/home school                        | 4     | 0.23   |
| 4 Elementary school                        | 353   | 20.67  |
| 5 Middle school                            | 403   | 23.59  |
| 6 High school                              | 189   | 11.07  |
| 7 Vocational school                        | 54    | 3.16   |
| 8 Two-/Three-Year College/Associate degree | 63    | 3.69   |
| 9 Four-Year College/Bachelor's degree      | 35    | 2.05   |
| 10 Master's degree                         | 3     | 0.18   |
| 11 Doctoral degree/Ph.D.                   | 1     | 0.06   |
| Total                                      | 1,708 | 100.00 |

**ba010\_1: Are You Literate**

|       | Freq. | %      |
|-------|-------|--------|
| 1 Yes | 242   | 39.87  |
| 2 No  | 365   | 60.13  |
| Total | 607   | 100.00 |

**ba011: What's Your Marital Status**

|                                                                              | Freq.  | %      |
|------------------------------------------------------------------------------|--------|--------|
| 1 Married with Spouse Present                                                | 14,594 | 75.25  |
| 2 Married but Not Living with Spouse Temporarily for<br>Reasons Such as Work | 1,662  | 8.57   |
| 3 Separated, no longer living together as a spouse                           | 96     | 0.49   |
| 4 Divorced                                                                   | 267    | 1.38   |
| 5 Widowed                                                                    | 2,662  | 13.73  |
| 6 Never Married                                                              | 114    | 0.59   |
| Total                                                                        | 19,395 | 100.00 |

**ba012: Do You Have Anyone Living Together as A Spouse?**

|       | Freq. | %      |
|-------|-------|--------|
| 1 Yes | 20    | 0.64   |
| 2 No  | 3,119 | 99.36  |
| Total | 3,139 | 100.00 |

**ba013: In the Past Year, How Many Months Have You Lived with Your Spouse**

| Mean  | SD   | Min  | Max   | Obs    |
|-------|------|------|-------|--------|
| 10.78 | 3.02 | 0.00 | 12.00 | 16,276 |

**ba014: How Often are Social Pensions Paid**

|                                                                                    | Freq.  | %      |
|------------------------------------------------------------------------------------|--------|--------|
| 1 One Month                                                                        | 7,934  | 40.91  |
| 2 One Quarter                                                                      | 653    | 3.37   |
| 3 Half a Year                                                                      | 531    | 2.74   |
| 4 One Year                                                                         | 1,311  | 6.76   |
| 5 More Than One Year                                                               | 12     | 0.06   |
| Participate in the Endowment Insurance But Haven't Reached the Age of Receiving It | 6,038  | 31.13  |
| 7 Didn't Participate in Any Social Endowment Insurance                             | 2,916  | 15.03  |
| Total                                                                              | 19,395 | 100.00 |

**ba014\_1: Number of Years**

| Mean | SD   | Min  | Max  | Obs |
|------|------|------|------|-----|
| 3.33 | 1.78 | 2.00 | 7.00 | 12  |

**ba015: What Type of Social Endowment Insurance Do You Participate in**

|                                                                          | Freq.  | %      |
|--------------------------------------------------------------------------|--------|--------|
| 1 Pension Insurance for Employees of State Organs or Public Institutions | 938    | 5.69   |
| 2 Worker's Basic Endowment Insurance                                     | 2,398  | 14.55  |
| 3 Social Endowment Insurance for Non-working Urban Residents             | 728    | 4.42   |
| 4 New Social Endowment Insurance for Rural Residents                     | 9,277  | 56.30  |
| 5 Social Endowment Insurance for Urban and Rural Residents               | 2,430  | 14.75  |
| 6 Other, Please Specify                                                  | 708    | 4.30   |
| Total                                                                    | 16,479 | 100.00 |

**ba016: How Much Does Social Medical Insurance Cost Per Year**

|                               | Freq.  | %      |
|-------------------------------|--------|--------|
| 1 Cost Per Year               | 15,166 | 78.20  |
| 2 No Need to Pay              | 3,295  | 16.99  |
| 3 No Social Medical Insurance | 934    | 4.82   |
| Total                         | 19,395 | 100.00 |



**ba016\_1:** How Much Does Social Medical Insurance Cost Per Year

| Mean   | SD       | Min   | Max       | Obs    |
|--------|----------|-------|-----------|--------|
| 428.35 | 1,731.49 | -1.00 | 99,220.00 | 15,172 |

**ba017:** Type of Social Medical Insurance

| Mean | SD   | Min  | Max  | Obs    |
|------|------|------|------|--------|
| 3.36 | 1.19 | 1.00 | 6.00 | 18,460 |

**ba018:** How Many Days Do You Live Alone in the First Half of This Year

| Mean  | SD    | Min  | Max    | Obs    |
|-------|-------|------|--------|--------|
| 22.18 | 52.54 | 0.00 | 182.00 | 19,395 |

**ba019:** In the First Half of This Year, How Many Days Do You Live with Your Spouse Only

| Mean  | SD    | Min  | Max    | Obs    |
|-------|-------|------|--------|--------|
| 82.42 | 82.75 | 0.00 | 182.00 | 16,276 |

**ba020:** In the First Half of This Year, To What Extent Does Not Live with Others Result

| Mean | SD    | Min  | Max    | Obs    |
|------|-------|------|--------|--------|
| 8.07 | 24.59 | 0.00 | 100.00 | 13,441 |

**xr18gender:** XR18Gender

| A String Variable |  |  |  |        |
|-------------------|--|--|--|--------|
| Obs:              |  |  |  | 19,242 |

**xr20gender:** XR20Gender

| A String Variable |  |  |  |        |
|-------------------|--|--|--|--------|
| Obs:              |  |  |  | 19,395 |

**daynumber:** DayNumber

| Mean  | SD    | Min  | Max    | Obs    |
|-------|-------|------|--------|--------|
| 91.35 | 84.44 | 0.00 | 364.00 | 19,395 |

**xrlivecovid:** XRLiveCovid

| A String Variable |  |  |  |        |
|-------------------|--|--|--|--------|
| Obs:              |  |  |  | 19,395 |

**xrage:** XRAge

| Mean  | SD    | Min   | Max    | Obs    |
|-------|-------|-------|--------|--------|
| 61.57 | 10.08 | 18.00 | 108.00 | 19,395 |

**xrgender:** XRGender

| Mean | SD   | Min  | Max  | Obs    |
|------|------|------|------|--------|
| 1.53 | 0.50 | 1.00 | 2.00 | 19,395 |

**xrpartner:** XRPartner

| Mean | SD   | Min  | Max  | Obs    |
|------|------|------|------|--------|
| 1.16 | 0.37 | 1.00 | 2.00 | 19,395 |

**xrresidencesurveyhome:** XRResidenceSurveyHome

| Mean | SD   | Min  | Max  | Obs    |
|------|------|------|------|--------|
| 1.14 | 0.34 | 1.00 | 2.00 | 19,395 |

**xrtype:** XRType

| Mean | SD   | Min  | Max  | Obs    |
|------|------|------|------|--------|
| 1.01 | 0.08 | 1.00 | 2.00 | 19,395 |

**ziwtime:** ZIWTime

| A String Variable |  |  |  |        |
|-------------------|--|--|--|--------|
| Obs:              |  |  |  | 19,264 |

**zrbirthyear:** ZRBirthYear

| Mean     | SD    | Min      | Max      | Obs    |
|----------|-------|----------|----------|--------|
| 1,958.38 | 10.07 | 1,912.00 | 2,002.00 | 19,238 |

**zredu:** ZREdu

| Mean | SD   | Min  | Max   | Obs    |
|------|------|------|-------|--------|
| 3.43 | 1.92 | 1.00 | 11.00 | 17,687 |

**zrgender:** ZRGender

| Mean | SD   | Min  | Max  | Obs    |
|------|------|------|------|--------|
| 1.53 | 0.50 | 1.00 | 2.00 | 19,242 |

versionID: Version ID

| A String Variable |        |
|-------------------|--------|
| Obs:              | 19,395 |

*This page intentionally left blank*

---

## Family Information

---

householdID: Household ID

| A String Variable |        |
|-------------------|--------|
| Obs:              | 11,406 |

communityID: Community ID

| A String Variable |        |
|-------------------|--------|
| Obs:              | 11,406 |

ca001: Family Respondent

|                   | Freq. | %      |
|-------------------|-------|--------|
| 1 Main Respondent | 4,332 | 52.24  |
| 2 Spouse          | 3,961 | 47.76  |
| Total             | 8,293 | 100.00 |

ca002\_1\_: Is ZChildName[1] Still Alive?

|       | Freq.  | %      |
|-------|--------|--------|
| 1 Yes | 10,725 | 99.45  |
| 2 No  | 59     | 0.55   |
| Total | 10,784 | 100.00 |

ca002\_2\_: Is ZChildName[2] Still Alive?

|       | Freq. | %      |
|-------|-------|--------|
| 1 Yes | 8,833 | 99.48  |
| 2 No  | 46    | 0.52   |
| Total | 8,879 | 100.00 |

ca002\_3\_: Is ZChildName[3] Still Alive?

|       | Freq. | %      |
|-------|-------|--------|
| 1 Yes | 4,836 | 99.10  |
| 2 No  | 44    | 0.90   |
| Total | 4,880 | 100.00 |

ca002\_4\_: Is ZChildName[4] Still Alive?

|       | Freq. | %      |
|-------|-------|--------|
| 1 Yes | 2,500 | 98.58  |
| 2 No  | 36    | 1.42   |
| Total | 2,536 | 100.00 |

ca002\_5\_: Is ZChildName[5] Still Alive?

|       | Freq. | %      |
|-------|-------|--------|
| 1 Yes | 1,161 | 98.64  |
| 2 No  | 16    | 1.36   |
| Total | 1,177 | 100.00 |

ca002\_6\_: Is ZChildName[6] Still Alive?

|       | Freq. | %      |
|-------|-------|--------|
| 1 Yes | 491   | 97.23  |
| 2 No  | 14    | 2.77   |
| Total | 505   | 100.00 |

ca002\_7\_: Is ZChildName[7] Still Alive?

|       | Freq. | %      |
|-------|-------|--------|
| 1 Yes | 224   | 97.82  |
| 2 No  | 5     | 2.18   |
| Total | 229   | 100.00 |

ca002\_8\_: Is ZChildName[8] Still Alive?

|       | Freq. | %      |
|-------|-------|--------|
| 1 Yes | 91    | 93.81  |
| 2 No  | 6     | 6.19   |
| Total | 97    | 100.00 |

ca002\_9\_: Is ZChildName[9] Still Alive?

|       | Freq. | %      |
|-------|-------|--------|
| 1 Yes | 36    | 94.74  |
| 2 No  | 2     | 5.26   |
| Total | 38    | 100.00 |

ca002\_10\_: Is ZChildName[10] Still Alive?

|       | Freq. | %      |
|-------|-------|--------|
| 1 Yes | 19    | 90.48  |
| 2 No  | 2     | 9.52   |
| Total | 21    | 100.00 |

ca002\_11\_: Is ZChildName[11] Still Alive?

|       | Freq. | %      |
|-------|-------|--------|
| 1 Yes | 8     | 88.89  |
| 2 No  | 1     | 11.11  |
| Total | 9     | 100.00 |

ca002\_12\_: Is ZChildName[12] Still Alive?

|       | Freq. | %      |
|-------|-------|--------|
| 1 Yes | 3     | 100.00 |
| Total | 3     | 100.00 |

ca002\_13\_: Is ZChildName[13] Still Alive?

|       | Freq. | %      |
|-------|-------|--------|
| 1 Yes | 1     | 100.00 |
| Total | 1     | 100.00 |

ca002\_14\_: Is ZChildName[14] Still Alive?

|                 |
|-----------------|
| No Observations |
|-----------------|

ca002\_15\_: Is ZChildName[15] Still Alive?

|                 |
|-----------------|
| No Observations |
|-----------------|

ca002\_16\_: Is ZChildName[16] Still Alive?

|                 |
|-----------------|
| No Observations |
|-----------------|

ca002\_17\_: Is ZChildName[17] Still Alive?

|       | Freq. | %      |
|-------|-------|--------|
| 1 Yes | 1     | 100.00 |
| Total | 1     | 100.00 |

ca003\_1\_1\_: When Did ZChildName[1] Pass Away (Year)

| Mean     | SD   | Min      | Max      | Obs |
|----------|------|----------|----------|-----|
| 2,018.41 | 1.69 | 2,011.00 | 2,020.00 | 59  |

**ca003\_1\_2\_:** When Did ZChildName[2] Pass Away (Year)

| Mean     | SD   | Min      | Max      | Obs |
|----------|------|----------|----------|-----|
| 2,018.33 | 2.11 | 2,011.00 | 2,020.00 | 46  |

**ca003\_1\_3\_:** When Did ZChildName[3] Pass Away (Year)

| Mean     | SD   | Min      | Max      | Obs |
|----------|------|----------|----------|-----|
| 2,018.32 | 2.13 | 2,011.00 | 2,020.00 | 44  |

**ca003\_1\_4\_:** When Did ZChildName[4] Pass Away (Year)

| Mean     | SD   | Min      | Max      | Obs |
|----------|------|----------|----------|-----|
| 2,018.22 | 2.38 | 2,011.00 | 2,020.00 | 36  |

**ca003\_1\_5\_:** When Did ZChildName[5] Pass Away (Year)

| Mean     | SD   | Min      | Max      | Obs |
|----------|------|----------|----------|-----|
| 2,018.25 | 2.32 | 2,012.00 | 2,020.00 | 16  |

**ca003\_1\_6\_:** When Did ZChildName[6] Pass Away (Year)

| Mean     | SD   | Min      | Max      | Obs |
|----------|------|----------|----------|-----|
| 2,018.57 | 1.45 | 2,015.00 | 2,020.00 | 14  |

**ca003\_1\_7\_:** When Did ZChildName[7] Pass Away (Year)

| Mean     | SD   | Min      | Max      | Obs |
|----------|------|----------|----------|-----|
| 2,019.60 | 0.55 | 2,019.00 | 2,020.00 | 5   |

**ca003\_1\_8\_:** When Did ZChildName[8] Pass Away (Year)

| Mean     | SD   | Min      | Max      | Obs |
|----------|------|----------|----------|-----|
| 2,017.67 | 2.88 | 2,012.00 | 2,020.00 | 6   |

**ca003\_1\_9\_:** When Did ZChildName[9] Pass Away (Year)

| Mean     | SD   | Min      | Max      | Obs |
|----------|------|----------|----------|-----|
| 2,019.50 | 0.71 | 2,019.00 | 2,020.00 | 2   |

**ca003\_1\_10\_:** When Did ZChildName[10] Pass Away (Year)

| Mean     | SD   | Min      | Max      | Obs |
|----------|------|----------|----------|-----|
| 2,018.50 | 0.71 | 2,018.00 | 2,019.00 | 2   |

**ca003\_1\_11\_:** When Did ZChildName[11] Pass Away (Year)



| Mean     | SD | Min      | Max      | Obs |
|----------|----|----------|----------|-----|
| 2,018.00 | .  | 2,018.00 | 2,018.00 | 1   |

**ca003\_2\_1\_:** When Did ZChildName[1] Pass Away (Month)

| Mean | SD   | Min  | Max   | Obs |
|------|------|------|-------|-----|
| 5.88 | 3.70 | 1.00 | 12.00 | 59  |

**ca003\_2\_2\_:** When Did ZChildName[2] Pass Away (Month)

| Mean | SD   | Min  | Max   | Obs |
|------|------|------|-------|-----|
| 6.43 | 3.84 | 1.00 | 12.00 | 46  |

**ca003\_2\_3\_:** When Did ZChildName[3] Pass Away (Month)

| Mean | SD   | Min  | Max   | Obs |
|------|------|------|-------|-----|
| 6.52 | 3.39 | 1.00 | 12.00 | 44  |

**ca003\_2\_4\_:** When Did ZChildName[4] Pass Away (Month)

| Mean | SD   | Min  | Max   | Obs |
|------|------|------|-------|-----|
| 5.64 | 3.31 | 1.00 | 12.00 | 36  |

**ca003\_2\_5\_:** When Did ZChildName[5] Pass Away (Month)

| Mean | SD   | Min  | Max   | Obs |
|------|------|------|-------|-----|
| 3.75 | 3.57 | 1.00 | 12.00 | 16  |

**ca003\_2\_6\_:** When Did ZChildName[6] Pass Away (Month)

| Mean | SD   | Min  | Max   | Obs |
|------|------|------|-------|-----|
| 4.29 | 3.31 | 1.00 | 10.00 | 14  |

**ca003\_2\_7\_:** When Did ZChildName[7] Pass Away (Month)

| Mean | SD   | Min  | Max   | Obs |
|------|------|------|-------|-----|
| 5.40 | 4.72 | 1.00 | 12.00 | 5   |

**ca003\_2\_8\_:** When Did ZChildName[8] Pass Away (Month)

| Mean | SD   | Min  | Max   | Obs |
|------|------|------|-------|-----|
| 7.33 | 3.83 | 1.00 | 12.00 | 6   |

**ca003\_2\_9\_:** When Did ZChildName[9] Pass Away (Month)

| Mean | SD   | Min  | Max   | Obs |
|------|------|------|-------|-----|
| 6.50 | 7.78 | 1.00 | 12.00 | 2   |

**ca003\_2\_10\_:** When Did ZChildName[10] Pass Away (Month)

| Mean | SD   | Min  | Max   | Obs |
|------|------|------|-------|-----|
| 8.50 | 4.95 | 5.00 | 12.00 | 2   |

**ca003\_2\_11\_:** When Did ZChildName[11] Pass Away (Month)

| Mean | SD | Min  | Max  | Obs |
|------|----|------|------|-----|
| 1.00 | .  | 1.00 | 1.00 | 1   |

**ca003\_3\_1\_:** When Did ZChildName[1] Pass Away (Day)

| Mean  | SD    | Min  | Max   | Obs |
|-------|-------|------|-------|-----|
| 13.67 | 10.03 | 1.00 | 29.00 | 45  |

**ca003\_3\_2\_:** When Did ZChildName[2] Pass Away (Day)

| Mean  | SD   | Min  | Max   | Obs |
|-------|------|------|-------|-----|
| 11.45 | 9.00 | 1.00 | 27.00 | 31  |

**ca003\_3\_3\_:** When Did ZChildName[3] Pass Away (Day)

| Mean  | SD   | Min  | Max   | Obs |
|-------|------|------|-------|-----|
| 13.65 | 9.15 | 1.00 | 30.00 | 31  |

**ca003\_3\_4\_:** When Did ZChildName[4] Pass Away (Day)

| Mean  | SD   | Min  | Max   | Obs |
|-------|------|------|-------|-----|
| 10.08 | 9.29 | 1.00 | 30.00 | 24  |

**ca003\_3\_5\_:** When Did ZChildName[5] Pass Away (Day)

| Mean | SD    | Min  | Max   | Obs |
|------|-------|------|-------|-----|
| 9.14 | 10.59 | 1.00 | 30.00 | 14  |

**ca003\_3\_6\_:** When Did ZChildName[6] Pass Away (Day)

| Mean | SD   | Min  | Max   | Obs |
|------|------|------|-------|-----|
| 7.50 | 7.25 | 1.00 | 19.00 | 8   |

**ca003\_3\_7\_:** When Did ZChildName[7] Pass Away (Day)

| Mean | SD   | Min  | Max   | Obs |
|------|------|------|-------|-----|
| 6.67 | 4.93 | 1.00 | 10.00 | 3   |

**ca003\_3\_8\_:** When Did ZChildName[8] Pass Away (Day)

| Mean | SD   | Min  | Max   | Obs |
|------|------|------|-------|-----|
| 5.75 | 4.57 | 1.00 | 12.00 | 4   |

**ca003\_3\_9\_:** When Did ZChildName[9] Pass Away (Day)

| Mean | SD | Min  | Max  | Obs |
|------|----|------|------|-----|
| 1.00 | .  | 1.00 | 1.00 | 1   |

**ca003\_3\_10\_:** When Did ZChildName[10] Pass Away (Day)

| Mean | SD | Min  | Max  | Obs |
|------|----|------|------|-----|
| 1.00 | .  | 1.00 | 1.00 | 1   |

**ca003\_3\_11\_:** When Did ZChildName[11] Pass Away (Day)

| Mean | SD | Min  | Max  | Obs |
|------|----|------|------|-----|
| 3.00 | .  | 3.00 | 3.00 | 1   |

**ca005\_1\_:** XChildPanAliveName[1]'s Birth Year

| Mean     | SD    | Min      | Max      | Obs |
|----------|-------|----------|----------|-----|
| 1,982.40 | 15.05 | 1,957.00 | 2,000.00 | 10  |

**ca005\_2\_:** XChildPanAliveName[2]'s Birth Year

| Mean     | SD    | Min      | Max      | Obs |
|----------|-------|----------|----------|-----|
| 1,974.27 | 12.37 | 1,959.00 | 1,996.00 | 11  |

**ca005\_3\_:** XChildPanAliveName[3]'s Birth Year

| Mean     | SD   | Min      | Max      | Obs |
|----------|------|----------|----------|-----|
| 1,969.25 | 5.12 | 1,962.00 | 1,974.00 | 4   |

**ca005\_4\_:** XChildPanAliveName[4]'s Birth Year

| Mean     | SD   | Min      | Max      | Obs |
|----------|------|----------|----------|-----|
| 1,973.20 | 9.15 | 1,964.00 | 1,988.00 | 5   |

**ca005\_5\_:** XChildPanAliveName[5]'s Birth Year

| Mean     | SD   | Min      | Max      | Obs |
|----------|------|----------|----------|-----|
| 1,978.17 | 8.38 | 1,967.00 | 1,989.00 | 6   |

**ca005\_6\_:** XChildPanAliveName[6]'s Birth Year

| Mean     | SD   | Min      | Max      | Obs |
|----------|------|----------|----------|-----|
| 1,972.00 | 4.24 | 1,969.00 | 1,975.00 | 2   |

**ca005\_7\_:** XChildPanAliveName[7]'s Birth Year

|                 |  |  |  |  |
|-----------------|--|--|--|--|
| No Observations |  |  |  |  |
|-----------------|--|--|--|--|

**ca006\_1\_:** XChildPanAliveName[1]'s Gender

|          | Freq. | %      |
|----------|-------|--------|
| 1 Male   | 26    | 53.06  |
| 2 Female | 23    | 46.94  |
| Total    | 49    | 100.00 |

**ca006\_2\_:** XChildPanAliveName[2]'s Gender

|          | Freq. | %      |
|----------|-------|--------|
| 1 Male   | 23    | 62.16  |
| 2 Female | 14    | 37.84  |
| Total    | 37    | 100.00 |

**ca006\_3\_:** XChildPanAliveName[3]'s Gender

|          | Freq. | %      |
|----------|-------|--------|
| 1 Male   | 10    | 58.82  |
| 2 Female | 7     | 41.18  |
| Total    | 17    | 100.00 |

**ca006\_4\_:** XChildPanAliveName[4]'s Gender

|          | Freq. | %      |
|----------|-------|--------|
| 1 Male   | 3     | 50.00  |
| 2 Female | 3     | 50.00  |
| Total    | 6     | 100.00 |

**ca006\_5\_:** XChildPanAliveName[5]'s Gender

|          | Freq. | %      |
|----------|-------|--------|
| 2 Female | 1     | 100.00 |
| Total    | 1     | 100.00 |

**ca006\_6\_:** XChildPanAliveName[6]'s Gender

|          | Freq. | %      |
|----------|-------|--------|
| 2 Female | 1     | 100.00 |
| Total    | 1     | 100.00 |

**ca006\_7\_:** XChildPanAliveName[7]'s Gender

|        | Freq. | %      |
|--------|-------|--------|
| 1 Male | 1     | 100.00 |
| Total  | 1     | 100.00 |

**ca007\_1\_:** XChildPanAliveName[1]'s Highest Degree

|                                            | Freq. | %      |
|--------------------------------------------|-------|--------|
| 1 No Formal Education(Illiterate)          | 14    | 1.74   |
| 2 Did not Finish Primary School            | 41    | 5.09   |
| 4 Elementary School                        | 94    | 11.66  |
| 5 Middle School                            | 194   | 24.07  |
| 6 High School                              | 97    | 12.03  |
| 7 Vocational School                        | 71    | 8.81   |
| 8 Two-/Three-Year College/Associate Degree | 112   | 13.90  |
| 9 Four-Year College/Bachelor's Degree      | 142   | 17.62  |
| 10 Master's Degree                         | 21    | 2.61   |
| 11 Doctoral Degree/Ph.D.                   | 1     | 0.12   |
| 997 Don't Know                             | 18    | 2.23   |
| 999 Refuse                                 | 1     | 0.12   |
| Total                                      | 806   | 100.00 |

**ca007\_2\_:** XChildPanAliveName[2]'s Highest Degree

|                                            | Freq. | %      |
|--------------------------------------------|-------|--------|
| 1 No Formal Education(Illiterate)          | 17    | 2.50   |
| 2 Did not Finish Primary School            | 56    | 8.25   |
| 4 Elementary School                        | 101   | 14.87  |
| 5 Middle School                            | 209   | 30.78  |
| 6 High School                              | 73    | 10.75  |
| 7 Vocational School                        | 44    | 6.48   |
| 8 Two-/Three-Year College/Associate Degree | 62    | 9.13   |
| 9 Four-Year College/Bachelor's Degree      | 84    | 12.37  |
| 10 Master's Degree                         | 11    | 1.62   |
| 11 Doctoral Degree/Ph.D.                   | 2     | 0.29   |
| 997 Don't Know                             | 18    | 2.65   |
| 999 Refuse                                 | 2     | 0.29   |
| Total                                      | 679   | 100.00 |

**ca007\_3\_:** XChildPanAliveName[3]'s Highest Degree

|                                   | Freq. | %     |
|-----------------------------------|-------|-------|
| 1 No Formal Education(Illiterate) | 26    | 7.01  |
| 2 Did not Finish Primary School   | 46    | 12.40 |
| 4 Elementary School               | 72    | 19.41 |
| 5 Middle School                   | 106   | 28.57 |
| 6 High School                     | 44    | 11.86 |

|                                            |     |        |
|--------------------------------------------|-----|--------|
| 7 Vocational School                        | 21  | 5.66   |
| 8 Two-/Three-Year College/Associate Degree | 25  | 6.74   |
| 9 Four-Year College/Bachelor's Degree      | 18  | 4.85   |
| 10 Master's Degree                         | 3   | 0.81   |
| 997 Don't Know                             | 9   | 2.43   |
| 999 Refuse                                 | 1   | 0.27   |
| Total                                      | 371 | 100.00 |

#### ca007\_4\_: XChildPanAliveName[4]'s Highest Degree

|                                            | Freq. | %      |
|--------------------------------------------|-------|--------|
| 1 No Formal Education(Illiterate)          | 15    | 6.52   |
| 2 Did not Finish Primary School            | 30    | 13.04  |
| 3 Sishu/Home School                        | 1     | 0.43   |
| 4 Elementary School                        | 56    | 24.35  |
| 5 Middle School                            | 47    | 20.43  |
| 6 High School                              | 19    | 8.26   |
| 7 Vocational School                        | 13    | 5.65   |
| 8 Two-/Three-Year College/Associate Degree | 19    | 8.26   |
| 9 Four-Year College/Bachelor's Degree      | 13    | 5.65   |
| 11 Doctoral Degree/Ph.D.                   | 1     | 0.43   |
| 997 Don't Know                             | 15    | 6.52   |
| 999 Refuse                                 | 1     | 0.43   |
| Total                                      | 230   | 100.00 |

#### ca007\_5\_: XChildPanAliveName[5]'s Highest Degree

|                                            | Freq. | %      |
|--------------------------------------------|-------|--------|
| 1 No Formal Education(Illiterate)          | 10    | 8.47   |
| 2 Did not Finish Primary School            | 24    | 20.34  |
| 4 Elementary School                        | 23    | 19.49  |
| 5 Middle School                            | 22    | 18.64  |
| 6 High School                              | 11    | 9.32   |
| 7 Vocational School                        | 3     | 2.54   |
| 8 Two-/Three-Year College/Associate Degree | 6     | 5.08   |
| 9 Four-Year College/Bachelor's Degree      | 6     | 5.08   |
| 10 Master's Degree                         | 1     | 0.85   |
| 11 Doctoral Degree/Ph.D.                   | 1     | 0.85   |
| 997 Don't Know                             | 11    | 9.32   |
| Total                                      | 118   | 100.00 |

#### ca007\_6\_: XChildPanAliveName[6]'s Highest Degree

|                                       | Freq. | %      |
|---------------------------------------|-------|--------|
| 1 No Formal Education(Illiterate)     | 12    | 25.53  |
| 2 Did not Finish Primary School       | 1     | 2.13   |
| 4 Elementary School                   | 8     | 17.02  |
| 5 Middle School                       | 10    | 21.28  |
| 6 High School                         | 3     | 6.38   |
| 7 Vocational School                   | 4     | 8.51   |
| 9 Four-Year College/Bachelor's Degree | 1     | 2.13   |
| 997 Don't Know                        | 8     | 17.02  |
| Total                                 | 47    | 100.00 |

**ca007\_7\_:** XChildPanAliveName[7]'s Highest Degree

|                                       | Freq. | %      |
|---------------------------------------|-------|--------|
| 1 No Formal Education(Illiterate)     | 9     | 30.00  |
| 2 Did not Finish Primary School       | 2     | 6.67   |
| 4 Elementary School                   | 4     | 13.33  |
| 5 Middle School                       | 8     | 26.67  |
| 6 High School                         | 3     | 10.00  |
| 7 Vocational School                   | 1     | 3.33   |
| 9 Four-Year College/Bachelor's Degree | 1     | 3.33   |
| 997 Don't Know                        | 2     | 6.67   |
| Total                                 | 30    | 100.00 |

**ca007\_8\_:** XChildPanAliveName[8]'s Highest Degree

|                                            | Freq. | %      |
|--------------------------------------------|-------|--------|
| 1 No Formal Education(Illiterate)          | 1     | 14.29  |
| 4 Elementary School                        | 2     | 28.57  |
| 5 Middle School                            | 1     | 14.29  |
| 8 Two-/Three-Year College/Associate Degree | 1     | 14.29  |
| 997 Don't Know                             | 2     | 28.57  |
| Total                                      | 7     | 100.00 |

**ca007\_9\_:** XChildPanAliveName[9]'s Highest Degree

|                                   | Freq. | %      |
|-----------------------------------|-------|--------|
| 1 No Formal Education(Illiterate) | 2     | 50.00  |
| 5 Middle School                   | 1     | 25.00  |
| 997 Don't Know                    | 1     | 25.00  |
| Total                             | 4     | 100.00 |

**ca007\_10\_:** XChildPanAliveName[10]'s Highest Degree

|                                            | Freq. | %      |
|--------------------------------------------|-------|--------|
| 5 Middle School                            | 2     | 50.00  |
| 8 Two-/Three-Year College/Associate Degree | 2     | 50.00  |
| Total                                      | 4     | 100.00 |

**ca007\_11\_:** XChildPanAliveName[11]'s Highest Degree

|                     | Freq. | %      |
|---------------------|-------|--------|
| 4 Elementary School | 2     | 50.00  |
| 5 Middle School     | 1     | 25.00  |
| 997 Don't Know      | 1     | 25.00  |
| Total               | 4     | 100.00 |

**ca007\_12\_:** XChildPanAliveName[12]'s Highest Degree

|                 | Freq. | %      |
|-----------------|-------|--------|
| 5 Middle School | 1     | 100.00 |
| Total           | 1     | 100.00 |

**ca007\_13\_**: XChildPanAliveName[13]'s Highest Degree

|                     | Freq. | %      |
|---------------------|-------|--------|
| 4 Elementary School | 1     | 100.00 |
| Total               | 1     | 100.00 |

**ca007\_14\_**: XChildPanAliveName[14]'s Highest Degree

|                 |
|-----------------|
| No Observations |
|-----------------|

**ca007\_15\_**: XChildPanAliveName[15]'s Highest Degree

|                 |
|-----------------|
| No Observations |
|-----------------|

**ca007\_16\_**: XChildPanAliveName[16]'s Highest Degree

|                 |
|-----------------|
| No Observations |
|-----------------|

**ca007\_17\_**: XChildPanAliveName[17]'s Highest Degree

|                                   | Freq. | %      |
|-----------------------------------|-------|--------|
| 1 No Formal Education(Illiterate) | 1     | 100.00 |
| Total                             | 1     | 100.00 |

**ca008\_1\_**: Is XChildAliveName[1] Working or A Student

|                                            | Freq.  | %      |
|--------------------------------------------|--------|--------|
| 1 Working                                  | 8,899  | 82.97  |
| 2 Student                                  | 308    | 2.87   |
| 3 A Student Working Part-time or Full-time | 24     | 0.22   |
| 4 Neither A Student Nor Dose She/He Work   | 1,448  | 13.50  |
| 997 Don't Know                             | 44     | 0.41   |
| 999 Refuse                                 | 2      | 0.02   |
| Total                                      | 10,725 | 100.00 |

**ca008\_2\_**: Is XChildAliveName[2] Working or A Student

|                                            | Freq. | %      |
|--------------------------------------------|-------|--------|
| 1 Working                                  | 6,842 | 77.46  |
| 2 Student                                  | 456   | 5.16   |
| 3 A Student Working Part-time or Full-time | 20    | 0.23   |
| 4 Neither A Student Nor Dose She/He Work   | 1,456 | 16.48  |
| 997 Don't Know                             | 55    | 0.62   |
| 999 Refuse                                 | 4     | 0.05   |
| Total                                      | 8,833 | 100.00 |

**ca008\_3\_**: Is XChildAliveName[3] Working or A Student

|           | Freq. | %     |
|-----------|-------|-------|
| 1 Working | 3,719 | 76.90 |



|                                            |       |        |
|--------------------------------------------|-------|--------|
| 2 Student                                  | 141   | 2.92   |
| 3 A Student Working Part-time or Full-time | 2     | 0.04   |
| 4 Neither A Student Nor Dose She/He Work   | 927   | 19.17  |
| 997 Don't Know                             | 45    | 0.93   |
| 999 Refuse                                 | 2     | 0.04   |
| Total                                      | 4,836 | 100.00 |

**ca008\_4\_:** Is XChildAliveName[4] Working or A Student

|                                            | Freq. | %      |
|--------------------------------------------|-------|--------|
| 1 Working                                  | 1,922 | 76.88  |
| 2 Student                                  | 40    | 1.60   |
| 3 A Student Working Part-time or Full-time | 2     | 0.08   |
| 4 Neither A Student Nor Dose She/He Work   | 505   | 20.20  |
| 997 Don't Know                             | 30    | 1.20   |
| 999 Refuse                                 | 1     | 0.04   |
| Total                                      | 2,500 | 100.00 |

**ca008\_5\_:** Is XChildAliveName[5] Working or A Student

|                                            | Freq. | %      |
|--------------------------------------------|-------|--------|
| 1 Working                                  | 858   | 73.90  |
| 2 Student                                  | 11    | 0.95   |
| 3 A Student Working Part-time or Full-time | 2     | 0.17   |
| 4 Neither A Student Nor Dose She/He Work   | 267   | 23.00  |
| 997 Don't Know                             | 23    | 1.98   |
| Total                                      | 1,161 | 100.00 |

**ca008\_6\_:** Is XChildAliveName[6] Working or A Student

|                                          | Freq. | %      |
|------------------------------------------|-------|--------|
| 1 Working                                | 362   | 73.73  |
| 2 Student                                | 2     | 0.41   |
| 4 Neither A Student Nor Dose She/He Work | 118   | 24.03  |
| 997 Don't Know                           | 9     | 1.83   |
| Total                                    | 491   | 100.00 |

**ca008\_7\_:** Is XChildAliveName[7] Working or A Student

|                                          | Freq. | %      |
|------------------------------------------|-------|--------|
| 1 Working                                | 163   | 72.77  |
| 2 Student                                | 4     | 1.79   |
| 4 Neither A Student Nor Dose She/He Work | 53    | 23.66  |
| 997 Don't Know                           | 4     | 1.79   |
| Total                                    | 224   | 100.00 |

**ca008\_8\_:** Is XChildAliveName[8] Working or A Student

|                                          | Freq. | %     |
|------------------------------------------|-------|-------|
| 1 Working                                | 63    | 69.23 |
| 2 Student                                | 2     | 2.20  |
| 4 Neither A Student Nor Dose She/He Work | 23    | 25.27 |

|                |    |        |
|----------------|----|--------|
| 997 Don't Know | 3  | 3.30   |
| Total          | 91 | 100.00 |

**ca008\_9\_:** Is XChildAliveName[9] Working or A Student

|                                          | Freq. | %      |
|------------------------------------------|-------|--------|
| 1 Working                                | 27    | 75.00  |
| 4 Neither A Student Nor Dose She/He Work | 8     | 22.22  |
| 997 Don't Know                           | 1     | 2.78   |
| Total                                    | 36    | 100.00 |

**ca008\_10\_:** Is XChildAliveName[10] Working or A Student

|                                          | Freq. | %      |
|------------------------------------------|-------|--------|
| 1 Working                                | 15    | 78.95  |
| 4 Neither A Student Nor Dose She/He Work | 3     | 15.79  |
| 997 Don't Know                           | 1     | 5.26   |
| Total                                    | 19    | 100.00 |

**ca008\_11\_:** Is XChildAliveName[11] Working or A Student

|                                          | Freq. | %      |
|------------------------------------------|-------|--------|
| 1 Working                                | 5     | 62.50  |
| 4 Neither A Student Nor Dose She/He Work | 2     | 25.00  |
| 997 Don't Know                           | 1     | 12.50  |
| Total                                    | 8     | 100.00 |

**ca008\_12\_:** Is XChildAliveName[12] Working or A Student

|                                          | Freq. | %      |
|------------------------------------------|-------|--------|
| 1 Working                                | 1     | 33.33  |
| 4 Neither A Student Nor Dose She/He Work | 2     | 66.67  |
| Total                                    | 3     | 100.00 |

**ca008\_13\_:** Is XChildAliveName[13] Working or A Student

|           | Freq. | %      |
|-----------|-------|--------|
| 1 Working | 1     | 100.00 |
| Total     | 1     | 100.00 |

**ca008\_14\_:** Is XChildAliveName[14] Working or A Student

|                 |  |  |
|-----------------|--|--|
| No Observations |  |  |
|-----------------|--|--|

**ca008\_15\_:** Is XChildAliveName[15] Working or A Student

|                 |  |  |
|-----------------|--|--|
| No Observations |  |  |
|-----------------|--|--|

**ca008\_16\_:** Is XChildAliveName[16] Working or A Student

No Observations

**ca008\_17\_:** Is XChildAliveName[17] Working or A Student

|           | Freq. | %      |
|-----------|-------|--------|
| 1 Working | 1     | 100.00 |
| Total     | 1     | 100.00 |

**ca010\_1\_:** XChildPanAliveName[1]'s Marital Status

|                                                                           | Freq.  | %      |
|---------------------------------------------------------------------------|--------|--------|
| 1 Married with Spouse Present                                             | 7,307  | 68.44  |
| 2 Married but not Living With Spouse Temporarily for Reasons Such as Work | 886    | 8.30   |
| 3 Separated                                                               | 81     | 0.76   |
| 4 Divorced                                                                | 438    | 4.10   |
| 5 Widowed                                                                 | 90     | 0.84   |
| 6 Never Married                                                           | 1,841  | 17.24  |
| 997 Don't Know                                                            | 32     | 0.30   |
| 999 Refuse                                                                | 1      | 0.01   |
| Total                                                                     | 10,676 | 100.00 |

**ca010\_2\_:** XChildPanAliveName[2]'s Marital Status

|                                                                           | Freq. | %      |
|---------------------------------------------------------------------------|-------|--------|
| 1 Married with Spouse Present                                             | 6,082 | 70.17  |
| 2 Married but not Living With Spouse Temporarily for Reasons Such as Work | 794   | 9.16   |
| 3 Separated                                                               | 51    | 0.59   |
| 4 Divorced                                                                | 334   | 3.85   |
| 5 Widowed                                                                 | 78    | 0.90   |
| 6 Never Married                                                           | 1,280 | 14.77  |
| 997 Don't Know                                                            | 44    | 0.51   |
| 999 Refuse                                                                | 5     | 0.06   |
| Total                                                                     | 8,668 | 100.00 |

**ca010\_3\_:** XChildPanAliveName[3]'s Marital Status

|                                                                           | Freq. | %      |
|---------------------------------------------------------------------------|-------|--------|
| 1 Married with Spouse Present                                             | 3,650 | 76.46  |
| 2 Married but not Living With Spouse Temporarily for Reasons Such as Work | 431   | 9.03   |
| 3 Separated                                                               | 26    | 0.54   |
| 4 Divorced                                                                | 171   | 3.58   |
| 5 Widowed                                                                 | 60    | 1.26   |
| 6 Never Married                                                           | 398   | 8.34   |
| 997 Don't Know                                                            | 35    | 0.73   |
| 999 Refuse                                                                | 3     | 0.06   |
| Total                                                                     | 4,774 | 100.00 |

**ca010\_4\_:** XChildPanAliveName[4]'s Marital Status

|                                                                           | Freq. | %      |
|---------------------------------------------------------------------------|-------|--------|
| 1 Married with Spouse Present                                             | 1,917 | 77.24  |
| 2 Married but not Living With Spouse Temporarily for Reasons Such as Work | 241   | 9.71   |
| 3 Separated                                                               | 15    | 0.60   |
| 4 Divorced                                                                | 82    | 3.30   |
| 5 Widowed                                                                 | 48    | 1.93   |
| 6 Never Married                                                           | 149   | 6.00   |
| 997 Don't Know                                                            | 29    | 1.17   |
| 999 Refuse                                                                | 1     | 0.04   |
| Total                                                                     | 2,482 | 100.00 |

#### ca010\_5\_: XChildPanAliveName[5]'s Marital Status

|                                                                           | Freq. | %      |
|---------------------------------------------------------------------------|-------|--------|
| 1 Married with Spouse Present                                             | 926   | 79.83  |
| 2 Married but not Living With Spouse Temporarily for Reasons Such as Work | 101   | 8.71   |
| 3 Separated                                                               | 6     | 0.52   |
| 4 Divorced                                                                | 41    | 3.53   |
| 5 Widowed                                                                 | 27    | 2.33   |
| 6 Never Married                                                           | 50    | 4.31   |
| 997 Don't Know                                                            | 9     | 0.78   |
| Total                                                                     | 1,160 | 100.00 |

#### ca010\_6\_: XChildPanAliveName[6]'s Marital Status

|                                                                           | Freq. | %      |
|---------------------------------------------------------------------------|-------|--------|
| 1 Married with Spouse Present                                             | 394   | 80.41  |
| 2 Married but not Living With Spouse Temporarily for Reasons Such as Work | 28    | 5.71   |
| 3 Separated                                                               | 3     | 0.61   |
| 4 Divorced                                                                | 20    | 4.08   |
| 5 Widowed                                                                 | 15    | 3.06   |
| 6 Never Married                                                           | 18    | 3.67   |
| 997 Don't Know                                                            | 12    | 2.45   |
| Total                                                                     | 490   | 100.00 |

#### ca010\_7\_: XChildPanAliveName[7]'s Marital Status

|                                                                           | Freq. | %      |
|---------------------------------------------------------------------------|-------|--------|
| 1 Married with Spouse Present                                             | 182   | 81.98  |
| 2 Married but not Living With Spouse Temporarily for Reasons Such as Work | 11    | 4.95   |
| 3 Separated                                                               | 2     | 0.90   |
| 4 Divorced                                                                | 7     | 3.15   |
| 5 Widowed                                                                 | 6     | 2.70   |
| 6 Never Married                                                           | 10    | 4.50   |
| 997 Don't Know                                                            | 4     | 1.80   |
| Total                                                                     | 222   | 100.00 |

#### ca010\_8\_: XChildPanAliveName[8]'s Marital Status

|                                                                           | Freq. | %      |
|---------------------------------------------------------------------------|-------|--------|
| 1 Married with Spouse Present                                             | 73    | 82.95  |
| 2 Married but not Living With Spouse Temporarily for Reasons Such as Work | 4     | 4.55   |
| 4 Divorced                                                                | 3     | 3.41   |
| 5 Widowed                                                                 | 3     | 3.41   |
| 6 Never Married                                                           | 3     | 3.41   |
| 997 Don't Know                                                            | 2     | 2.27   |
| Total                                                                     | 88    | 100.00 |

**ca010\_9\_:** XChildPanAliveName[9]'s Marital Status

|                                                                           | Freq. | %      |
|---------------------------------------------------------------------------|-------|--------|
| 1 Married with Spouse Present                                             | 28    | 77.78  |
| 2 Married but not Living With Spouse Temporarily for Reasons Such as Work | 3     | 8.33   |
| 5 Widowed                                                                 | 3     | 8.33   |
| 6 Never Married                                                           | 1     | 2.78   |
| 997 Don't Know                                                            | 1     | 2.78   |
| Total                                                                     | 36    | 100.00 |

**ca010\_10\_:** XChildPanAliveName[10]'s Marital Status

|                                                                           | Freq. | %      |
|---------------------------------------------------------------------------|-------|--------|
| 1 Married with Spouse Present                                             | 15    | 78.95  |
| 2 Married but not Living With Spouse Temporarily for Reasons Such as Work | 2     | 10.53  |
| 6 Never Married                                                           | 1     | 5.26   |
| 997 Don't Know                                                            | 1     | 5.26   |
| Total                                                                     | 19    | 100.00 |

**ca010\_11\_:** XChildPanAliveName[11]'s Marital Status

|                                                                           | Freq. | %      |
|---------------------------------------------------------------------------|-------|--------|
| 1 Married with Spouse Present                                             | 6     | 75.00  |
| 2 Married but not Living With Spouse Temporarily for Reasons Such as Work | 1     | 12.50  |
| 997 Don't Know                                                            | 1     | 12.50  |
| Total                                                                     | 8     | 100.00 |

**ca010\_12\_:** XChildPanAliveName[12]'s Marital Status

|                               | Freq. | %      |
|-------------------------------|-------|--------|
| 1 Married with Spouse Present | 3     | 100.00 |
| Total                         | 3     | 100.00 |

**ca010\_13\_:** XChildPanAliveName[13]'s Marital Status

|                               | Freq. | %      |
|-------------------------------|-------|--------|
| 1 Married with Spouse Present | 1     | 100.00 |

|       |   |        |
|-------|---|--------|
| Total | 1 | 100.00 |
|-------|---|--------|

**ca010\_14\_:** XChildPanAliveName[14]'s Marital Status

|                 |
|-----------------|
| No Observations |
|-----------------|

**ca010\_15\_:** XChildPanAliveName[15]'s Marital Status

|                 |
|-----------------|
| No Observations |
|-----------------|

**ca010\_16\_:** XChildPanAliveName[16]'s Marital Status

|                 |
|-----------------|
| No Observations |
|-----------------|

**ca010\_17\_:** XChildPanAliveName[17]'s Marital Status

|                               | Freq. | %      |
|-------------------------------|-------|--------|
| 1 Married with Spouse Present | 1     | 100.00 |
| Total                         | 1     | 100.00 |

**ca012\_1\_:** XChildCoupleDis[1]'s Annual Income

|                          | Freq.  | %      |
|--------------------------|--------|--------|
| 1 No Income              | 649    | 6.08   |
| 2 Less Than 2000 Yuan    | 85     | 0.80   |
| 3 2000-5000 Yuan         | 312    | 2.92   |
| 4 5000-10000 Yuan        | 438    | 4.10   |
| 5 10000-20000 Yuan       | 1,038  | 9.72   |
| 6 20000-30000 Yuan       | 1,308  | 12.25  |
| 7 30000-50000 Yuan       | 1,826  | 17.10  |
| 8 50000-100000 Yuan      | 1,850  | 17.33  |
| 9 100000-150000 Yuan     | 592    | 5.55   |
| 10 150000-200000 Yuan    | 158    | 1.48   |
| 11 200000-300000 Yuan    | 121    | 1.13   |
| 12 More Than 300000 Yuan | 96     | 0.90   |
| 997 Don't Know           | 2,193  | 20.54  |
| 999 Refuse               | 10     | 0.09   |
| Total                    | 10,676 | 100.00 |

**ca012\_2\_:** XChildCoupleDis[2]'s Annual Income

|                       | Freq. | %     |
|-----------------------|-------|-------|
| 1 No Income           | 582   | 6.71  |
| 2 Less Than 2000 Yuan | 60    | 0.69  |
| 3 2000-5000 Yuan      | 196   | 2.26  |
| 4 5000-10000 Yuan     | 302   | 3.48  |
| 5 10000-20000 Yuan    | 788   | 9.09  |
| 6 20000-30000 Yuan    | 976   | 11.26 |
| 7 30000-50000 Yuan    | 1,332 | 15.37 |
| 8 50000-100000 Yuan   | 1,371 | 15.82 |
| 9 100000-150000 Yuan  | 486   | 5.61  |
| 10 150000-200000 Yuan | 150   | 1.73  |

|                          |       |        |
|--------------------------|-------|--------|
| 11 200000-300000 Yuan    | 103   | 1.19   |
| 12 More Than 300000 Yuan | 75    | 0.87   |
| 997 Don't Know           | 2,235 | 25.78  |
| 999 Refuse               | 12    | 0.14   |
| Total                    | 8,668 | 100.00 |

### ca012\_3\_: XChildCoupleDis[3]'s Annual Income

|                          | Freq. | %      |
|--------------------------|-------|--------|
| 1 No Income              | 220   | 4.61   |
| 2 Less Than 2000 Yuan    | 50    | 1.05   |
| 3 2000-5000 Yuan         | 108   | 2.26   |
| 4 5000-10000 Yuan        | 182   | 3.81   |
| 5 10000-20000 Yuan       | 427   | 8.94   |
| 6 20000-30000 Yuan       | 457   | 9.57   |
| 7 30000-50000 Yuan       | 725   | 15.19  |
| 8 50000-100000 Yuan      | 734   | 15.37  |
| 9 100000-150000 Yuan     | 278   | 5.82   |
| 10 150000-200000 Yuan    | 74    | 1.55   |
| 11 200000-300000 Yuan    | 49    | 1.03   |
| 12 More Than 300000 Yuan | 36    | 0.75   |
| 997 Don't Know           | 1,429 | 29.93  |
| 999 Refuse               | 5     | 0.10   |
| Total                    | 4,774 | 100.00 |

### ca012\_4\_: XChildCoupleDis[4]'s Annual Income

|                          | Freq. | %      |
|--------------------------|-------|--------|
| 1 No Income              | 76    | 3.06   |
| 2 Less Than 2000 Yuan    | 18    | 0.73   |
| 3 2000-5000 Yuan         | 66    | 2.66   |
| 4 5000-10000 Yuan        | 102   | 4.11   |
| 5 10000-20000 Yuan       | 220   | 8.86   |
| 6 20000-30000 Yuan       | 267   | 10.76  |
| 7 30000-50000 Yuan       | 388   | 15.63  |
| 8 50000-100000 Yuan      | 320   | 12.89  |
| 9 100000-150000 Yuan     | 113   | 4.55   |
| 10 150000-200000 Yuan    | 51    | 2.05   |
| 11 200000-300000 Yuan    | 25    | 1.01   |
| 12 More Than 300000 Yuan | 22    | 0.89   |
| 997 Don't Know           | 810   | 32.63  |
| 999 Refuse               | 4     | 0.16   |
| Total                    | 2,482 | 100.00 |

### ca012\_5\_: XChildCoupleDis[5]'s Annual Income

|                       | Freq. | %     |
|-----------------------|-------|-------|
| 1 No Income           | 51    | 4.40  |
| 2 Less Than 2000 Yuan | 10    | 0.86  |
| 3 2000-5000 Yuan      | 41    | 3.53  |
| 4 5000-10000 Yuan     | 51    | 4.40  |
| 5 10000-20000 Yuan    | 114   | 9.83  |
| 6 20000-30000 Yuan    | 107   | 9.22  |
| 7 30000-50000 Yuan    | 150   | 12.93 |
| 8 50000-100000 Yuan   | 140   | 12.07 |

|                          |       |        |
|--------------------------|-------|--------|
| 9 100000-150000 Yuan     | 55    | 4.74   |
| 10 150000-200000 Yuan    | 17    | 1.47   |
| 11 200000-300000 Yuan    | 4     | 0.34   |
| 12 More Than 300000 Yuan | 6     | 0.52   |
| 997 Don't Know           | 414   | 35.69  |
| Total                    | 1,160 | 100.00 |

#### ca012\_6\_: XChildCoupleDis[6]'s Annual Income

|                          | Freq. | %      |
|--------------------------|-------|--------|
| 1 No Income              | 19    | 3.88   |
| 2 Less Than 2000 Yuan    | 5     | 1.02   |
| 3 2000-5000 Yuan         | 15    | 3.06   |
| 4 5000-10000 Yuan        | 19    | 3.88   |
| 5 10000-20000 Yuan       | 43    | 8.78   |
| 6 20000-30000 Yuan       | 57    | 11.63  |
| 7 30000-50000 Yuan       | 64    | 13.06  |
| 8 50000-100000 Yuan      | 51    | 10.41  |
| 9 100000-150000 Yuan     | 21    | 4.29   |
| 10 150000-200000 Yuan    | 7     | 1.43   |
| 11 200000-300000 Yuan    | 3     | 0.61   |
| 12 More Than 300000 Yuan | 2     | 0.41   |
| 997 Don't Know           | 184   | 37.55  |
| Total                    | 490   | 100.00 |

#### ca012\_7\_: XChildCoupleDis[7]'s Annual Income

|                       | Freq. | %      |
|-----------------------|-------|--------|
| 1 No Income           | 11    | 4.95   |
| 2 Less Than 2000 Yuan | 1     | 0.45   |
| 3 2000-5000 Yuan      | 9     | 4.05   |
| 4 5000-10000 Yuan     | 12    | 5.41   |
| 5 10000-20000 Yuan    | 20    | 9.01   |
| 6 20000-30000 Yuan    | 22    | 9.91   |
| 7 30000-50000 Yuan    | 25    | 11.26  |
| 8 50000-100000 Yuan   | 24    | 10.81  |
| 9 100000-150000 Yuan  | 12    | 5.41   |
| 10 150000-200000 Yuan | 4     | 1.80   |
| 11 200000-300000 Yuan | 1     | 0.45   |
| 997 Don't Know        | 81    | 36.49  |
| Total                 | 222   | 100.00 |

#### ca012\_8\_: XChildCoupleDis[8]'s Annual Income

|                       | Freq. | %    |
|-----------------------|-------|------|
| 1 No Income           | 6     | 6.82 |
| 2 Less Than 2000 Yuan | 2     | 2.27 |
| 3 2000-5000 Yuan      | 3     | 3.41 |
| 4 5000-10000 Yuan     | 3     | 3.41 |
| 5 10000-20000 Yuan    | 7     | 7.95 |
| 6 20000-30000 Yuan    | 6     | 6.82 |
| 7 30000-50000 Yuan    | 6     | 6.82 |
| 8 50000-100000 Yuan   | 8     | 9.09 |
| 9 100000-150000 Yuan  | 5     | 5.68 |
| 10 150000-200000 Yuan | 1     | 1.14 |



|                |    |        |
|----------------|----|--------|
| 997 Don't Know | 41 | 46.59  |
| Total          | 88 | 100.00 |

**ca012\_9\_:** XChildCoupleDis[9]'s Annual Income

|                       | Freq. | %      |
|-----------------------|-------|--------|
| 1 No Income           | 1     | 2.78   |
| 2 Less Than 2000 Yuan | 2     | 5.56   |
| 3 2000-5000 Yuan      | 2     | 5.56   |
| 4 5000-10000 Yuan     | 3     | 8.33   |
| 5 10000-20000 Yuan    | 3     | 8.33   |
| 6 20000-30000 Yuan    | 2     | 5.56   |
| 7 30000-50000 Yuan    | 1     | 2.78   |
| 8 50000-100000 Yuan   | 4     | 11.11  |
| 9 100000-150000 Yuan  | 1     | 2.78   |
| 10 150000-200000 Yuan | 1     | 2.78   |
| 997 Don't Know        | 16    | 44.44  |
| Total                 | 36    | 100.00 |

**ca012\_10\_:** XChildCoupleDis[10]'s Annual Income

|                      | Freq. | %      |
|----------------------|-------|--------|
| 1 No Income          | 1     | 5.26   |
| 4 5000-10000 Yuan    | 2     | 10.53  |
| 5 10000-20000 Yuan   | 1     | 5.26   |
| 7 30000-50000 Yuan   | 1     | 5.26   |
| 8 50000-100000 Yuan  | 6     | 31.58  |
| 9 100000-150000 Yuan | 1     | 5.26   |
| 997 Don't Know       | 7     | 36.84  |
| Total                | 19    | 100.00 |

**ca012\_11\_:** XChildCoupleDis[11]'s Annual Income

|                      | Freq. | %      |
|----------------------|-------|--------|
| 4 5000-10000 Yuan    | 1     | 12.50  |
| 7 30000-50000 Yuan   | 1     | 12.50  |
| 8 50000-100000 Yuan  | 1     | 12.50  |
| 9 100000-150000 Yuan | 1     | 12.50  |
| 997 Don't Know       | 4     | 50.00  |
| Total                | 8     | 100.00 |

**ca012\_12\_:** XChildCoupleDis[12]'s Annual Income

|                     | Freq. | %      |
|---------------------|-------|--------|
| 7 30000-50000 Yuan  | 1     | 33.33  |
| 8 50000-100000 Yuan | 1     | 33.33  |
| 997 Don't Know      | 1     | 33.33  |
| Total               | 3     | 100.00 |

**ca012\_13\_:** XChildCoupleDis[13]'s Annual Income

|  | Freq. | % |
|--|-------|---|
|--|-------|---|

|                |   |        |
|----------------|---|--------|
| 997 Don't Know | 1 | 100.00 |
| Total          | 1 | 100.00 |

#### ca012\_14\_: XChildCoupleDis[14]'s Annual Income

No Observations

#### ca012\_15\_: XChildCoupleDis[15]'s Annual Income

No Observations

#### ca012\_16\_: XChildCoupleDis[16]'s Annual Income

No Observations

#### ca012\_17\_: XChildCoupleDis[17]'s Annual Income

|                | Freq. | %      |
|----------------|-------|--------|
| 997 Don't Know | 1     | 100.00 |
| Total          | 1     | 100.00 |

#### ca013\_1\_: XChildPanAliveName[1]'s Health Status

|                | Freq.  | %      |
|----------------|--------|--------|
| 1 Very Good    | 3,430  | 31.96  |
| 2 Good         | 2,524  | 23.52  |
| 3 Fair         | 4,061  | 37.84  |
| 4 Poor         | 483    | 4.50   |
| 5 Very Poor    | 151    | 1.41   |
| 997 Don't Know | 80     | 0.75   |
| 999 Refuse     | 4      | 0.04   |
| Total          | 10,733 | 100.00 |

#### ca013\_2\_: XChildPanAliveName[2]'s Health Status

|                | Freq. | %      |
|----------------|-------|--------|
| 1 Very Good    | 2,866 | 32.43  |
| 2 Good         | 2,144 | 24.26  |
| 3 Fair         | 3,174 | 35.91  |
| 4 Poor         | 451   | 5.10   |
| 5 Very Poor    | 120   | 1.36   |
| 997 Don't Know | 79    | 0.89   |
| 999 Refuse     | 4     | 0.05   |
| Total          | 8,838 | 100.00 |

#### ca013\_3\_: XChildPanAliveName[3]'s Health Status

|             | Freq. | %     |
|-------------|-------|-------|
| 1 Very Good | 1,339 | 27.65 |
| 2 Good      | 1,204 | 24.86 |

|                |       |        |
|----------------|-------|--------|
| 3 Fair         | 1,892 | 39.07  |
| 4 Poor         | 268   | 5.53   |
| 5 Very Poor    | 72    | 1.49   |
| 997 Don't Know | 65    | 1.34   |
| 999 Refuse     | 3     | 0.06   |
| Total          | 4,843 | 100.00 |

**ca013\_4\_:** XChildPanAliveName[4]'s Health Status

|                | Freq. | %      |
|----------------|-------|--------|
| 1 Very Good    | 632   | 25.21  |
| 2 Good         | 650   | 25.93  |
| 3 Fair         | 1,002 | 39.97  |
| 4 Poor         | 151   | 6.02   |
| 5 Very Poor    | 30    | 1.20   |
| 997 Don't Know | 40    | 1.60   |
| 999 Refuse     | 2     | 0.08   |
| Total          | 2,507 | 100.00 |

**ca013\_5\_:** XChildPanAliveName[5]'s Health Status

|                | Freq. | %      |
|----------------|-------|--------|
| 1 Very Good    | 268   | 23.04  |
| 2 Good         | 275   | 23.65  |
| 3 Fair         | 485   | 41.70  |
| 4 Poor         | 84    | 7.22   |
| 5 Very Poor    | 22    | 1.89   |
| 997 Don't Know | 29    | 2.49   |
| Total          | 1,163 | 100.00 |

**ca013\_6\_:** XChildPanAliveName[6]'s Health Status

|                | Freq. | %      |
|----------------|-------|--------|
| 1 Very Good    | 106   | 21.50  |
| 2 Good         | 129   | 26.17  |
| 3 Fair         | 191   | 38.74  |
| 4 Poor         | 38    | 7.71   |
| 5 Very Poor    | 10    | 2.03   |
| 997 Don't Know | 19    | 3.85   |
| Total          | 493   | 100.00 |

**ca013\_7\_:** XChildPanAliveName[7]'s Health Status

|                | Freq. | %      |
|----------------|-------|--------|
| 1 Very Good    | 54    | 23.89  |
| 2 Good         | 62    | 27.43  |
| 3 Fair         | 89    | 39.38  |
| 4 Poor         | 10    | 4.42   |
| 5 Very Poor    | 4     | 1.77   |
| 997 Don't Know | 7     | 3.10   |
| Total          | 226   | 100.00 |

**ca013\_8\_:** XChildPanAliveName[8]'s Health Status

|                | Freq. | %      |
|----------------|-------|--------|
| 1 Very Good    | 18    | 19.78  |
| 2 Good         | 30    | 32.97  |
| 3 Fair         | 34    | 37.36  |
| 4 Poor         | 4     | 4.40   |
| 5 Very Poor    | 2     | 2.20   |
| 997 Don't Know | 3     | 3.30   |
| Total          | 91    | 100.00 |

**ca013\_9\_:** XChildPanAliveName[9]'s Health Status

|                | Freq. | %      |
|----------------|-------|--------|
| 1 Very Good    | 3     | 8.33   |
| 2 Good         | 12    | 33.33  |
| 3 Fair         | 13    | 36.11  |
| 4 Poor         | 3     | 8.33   |
| 5 Very Poor    | 4     | 11.11  |
| 997 Don't Know | 1     | 2.78   |
| Total          | 36    | 100.00 |

**ca013\_10\_:** XChildPanAliveName[10]'s Health Status

|                | Freq. | %      |
|----------------|-------|--------|
| 1 Very Good    | 5     | 26.32  |
| 2 Good         | 6     | 31.58  |
| 3 Fair         | 6     | 31.58  |
| 4 Poor         | 1     | 5.26   |
| 997 Don't Know | 1     | 5.26   |
| Total          | 19    | 100.00 |

**ca013\_11\_:** XChildPanAliveName[11]'s Health Status

|                | Freq. | %      |
|----------------|-------|--------|
| 1 Very Good    | 1     | 12.50  |
| 2 Good         | 1     | 12.50  |
| 3 Fair         | 4     | 50.00  |
| 4 Poor         | 1     | 12.50  |
| 997 Don't Know | 1     | 12.50  |
| Total          | 8     | 100.00 |

**ca013\_12\_:** XChildPanAliveName[12]'s Health Status

|             | Freq. | %      |
|-------------|-------|--------|
| 1 Very Good | 1     | 33.33  |
| 3 Fair      | 2     | 66.67  |
| Total       | 3     | 100.00 |

**ca013\_13\_:** XChildPanAliveName[13]'s Health Status

|  | Freq. | % |
|--|-------|---|
|--|-------|---|

|             |   |        |
|-------------|---|--------|
| 1 Very Good | 1 | 100.00 |
| Total       | 1 | 100.00 |

**ca013\_14\_ : XChildPanAliveName[14]'s Health Status**

No Observations

**ca013\_15\_ : XChildPanAliveName[15]'s Health Status**

No Observations

**ca013\_16\_ : XChildPanAliveName[16]'s Health Status**

No Observations

**ca013\_17\_ : XChildPanAliveName[17]'s Health Status**

|             | Freq. | %      |
|-------------|-------|--------|
| 1 Very Good | 1     | 100.00 |
| Total       | 1     | 100.00 |

**ca014\_1\_ : How Long XFamilyRAndS Lived With XChildPanAliveName[1]**

| Mean | SD   | Min  | Max   | Obs    |
|------|------|------|-------|--------|
| 3.63 | 4.94 | 0.00 | 12.00 | 10,733 |

**ca014\_2\_ : How Long XFamilyRAndS Lived With XChildPanAliveName[2]**

| Mean | SD   | Min  | Max   | Obs   |
|------|------|------|-------|-------|
| 2.23 | 4.10 | 0.00 | 12.00 | 8,838 |

**ca014\_3\_ : How Long XFamilyRAndS Lived With XChildPanAliveName[3]**

| Mean | SD   | Min  | Max   | Obs   |
|------|------|------|-------|-------|
| 1.49 | 3.47 | 0.00 | 12.00 | 4,843 |

**ca014\_4\_ : How Long XFamilyRAndS Lived With XChildPanAliveName[4]**

| Mean | SD   | Min  | Max   | Obs   |
|------|------|------|-------|-------|
| 1.23 | 3.17 | 0.00 | 12.00 | 2,507 |

**ca014\_5\_ : How Long XFamilyRAndS Lived With XChildPanAliveName[5]**

| Mean | SD   | Min  | Max   | Obs   |
|------|------|------|-------|-------|
| 0.90 | 2.63 | 0.00 | 12.00 | 1,163 |

**ca014\_6\_ : How Long XFamilyRAndS Lived With XChildPanAliveName[6]**

| Mean | SD   | Min  | Max   | Obs |
|------|------|------|-------|-----|
| 0.74 | 2.49 | 0.00 | 12.00 | 493 |

**ca014\_7\_:** How Long XFamilyRAndS Lived With XChildPanAliveName[7]

| Mean | SD   | Min  | Max   | Obs |
|------|------|------|-------|-----|
| 0.96 | 2.85 | 0.00 | 12.00 | 226 |

**ca014\_8\_:** How Long XFamilyRAndS Lived With XChildPanAliveName[8]

| Mean | SD   | Min  | Max   | Obs |
|------|------|------|-------|-----|
| 0.86 | 2.67 | 0.00 | 12.00 | 91  |

**ca014\_9\_:** How Long XFamilyRAndS Lived With XChildPanAliveName[9]

| Mean | SD   | Min  | Max   | Obs |
|------|------|------|-------|-----|
| 0.94 | 2.97 | 0.00 | 12.00 | 36  |

**ca014\_10\_:** How Long XFamilyRAndS Lived With XChildPanAliveName[10]

| Mean | SD   | Min  | Max   | Obs |
|------|------|------|-------|-----|
| 1.21 | 3.34 | 0.00 | 12.00 | 19  |

**ca014\_11\_:** How Long XFamilyRAndS Lived With XChildPanAliveName[11]

| Mean | SD   | Min  | Max  | Obs |
|------|------|------|------|-----|
| 0.00 | 0.00 | 0.00 | 0.00 | 8   |

**ca014\_12\_:** How Long XFamilyRAndS Lived With XChildPanAliveName[12]

| Mean | SD   | Min  | Max  | Obs |
|------|------|------|------|-----|
| 0.00 | 0.00 | 0.00 | 0.00 | 3   |

**ca014\_13\_:** How Long XFamilyRAndS Lived With XChildPanAliveName[13]

| Mean  | SD | Min   | Max   | Obs |
|-------|----|-------|-------|-----|
| 12.00 | .  | 12.00 | 12.00 | 1   |

**ca014\_14\_:** How Long XFamilyRAndS Lived With XChildPanAliveName[14]

|                 |  |  |  |  |
|-----------------|--|--|--|--|
| No Observations |  |  |  |  |
|-----------------|--|--|--|--|

**ca014\_15\_:** How Long XFamilyRAndS Lived With XChildPanAliveName[15]

|                 |  |  |  |  |
|-----------------|--|--|--|--|
| No Observations |  |  |  |  |
|-----------------|--|--|--|--|

**ca014\_16\_:** How Long XFamilyRAndS Lived With XChildPanAliveName[16]

No Observations

**ca014\_17\_:** How Long XFamilyRAndS Lived With XChildPanAliveName[17]

| Mean | SD | Min  | Max  | Obs |
|------|----|------|------|-----|
| 0.00 | .  | 0.00 | 0.00 | 1   |

**ca015\_1\_:** Frequency See XChildPanAliveName[1]

|                           | Freq. | %      |
|---------------------------|-------|--------|
| 1 Almost Every Day        | 955   | 11.49  |
| 2 2-3 Times a Week        | 484   | 5.82   |
| 3 Once a week             | 765   | 9.20   |
| 4 Every Two Weeks         | 750   | 9.02   |
| 5 Once a Month            | 1,049 | 12.62  |
| 6 Once Every Three Months | 946   | 11.38  |
| 7 Once Every Six Months   | 1,056 | 12.70  |
| 8 Once a Year             | 1,426 | 17.16  |
| 9 Almost Never            | 451   | 5.43   |
| 10 Other                  | 430   | 5.17   |
| Total                     | 8,312 | 100.00 |

**ca015\_2\_:** Frequency See XChildPanAliveName[2]

|                           | Freq. | %      |
|---------------------------|-------|--------|
| 1 Almost Every Day        | 815   | 10.54  |
| 2 2-3 Times a Week        | 407   | 5.26   |
| 3 Once a week             | 737   | 9.53   |
| 4 Every Two Weeks         | 735   | 9.50   |
| 5 Once a Month            | 1,041 | 13.46  |
| 6 Once Every Three Months | 839   | 10.85  |
| 7 Once Every Six Months   | 956   | 12.36  |
| 8 Once a Year             | 1,365 | 17.65  |
| 9 Almost Never            | 446   | 5.77   |
| 10 Other                  | 393   | 5.08   |
| Total                     | 7,734 | 100.00 |

**ca015\_3\_:** Frequency See XChildPanAliveName[3]

|                           | Freq. | %      |
|---------------------------|-------|--------|
| 1 Almost Every Day        | 476   | 10.70  |
| 2 2-3 Times a Week        | 249   | 5.60   |
| 3 Once a week             | 406   | 9.13   |
| 4 Every Two Weeks         | 417   | 9.38   |
| 5 Once a Month            | 587   | 13.20  |
| 6 Once Every Three Months | 456   | 10.25  |
| 7 Once Every Six Months   | 544   | 12.23  |
| 8 Once a Year             | 791   | 17.79  |
| 9 Almost Never            | 273   | 6.14   |
| 10 Other                  | 248   | 5.58   |
| Total                     | 4,447 | 100.00 |

**ca015\_4\_:** Frequency See XChildPanAliveName[4]

|                           | Freq. | %      |
|---------------------------|-------|--------|
| 1 Almost Every Day        | 216   | 9.22   |
| 2 2-3 Times a Week        | 130   | 5.55   |
| 3 Once a week             | 189   | 8.07   |
| 4 Every Two Weeks         | 218   | 9.30   |
| 5 Once a Month            | 335   | 14.30  |
| 6 Once Every Three Months | 281   | 11.99  |
| 7 Once Every Six Months   | 284   | 12.12  |
| 8 Once a Year             | 378   | 16.13  |
| 9 Almost Never            | 155   | 6.62   |
| 10 Other                  | 157   | 6.70   |
| Total                     | 2,343 | 100.00 |

**ca015\_5\_:** Frequency See XChildPanAliveName[5]

|                           | Freq. | %      |
|---------------------------|-------|--------|
| 1 Almost Every Day        | 85    | 7.62   |
| 2 2-3 Times a Week        | 65    | 5.82   |
| 3 Once a week             | 91    | 8.15   |
| 4 Every Two Weeks         | 103   | 9.23   |
| 5 Once a Month            | 158   | 14.16  |
| 6 Once Every Three Months | 138   | 12.37  |
| 7 Once Every Six Months   | 142   | 12.72  |
| 8 Once a Year             | 175   | 15.68  |
| 9 Almost Never            | 86    | 7.71   |
| 10 Other                  | 73    | 6.54   |
| Total                     | 1,116 | 100.00 |

**ca015\_6\_:** Frequency See XChildPanAliveName[6]

|                           | Freq. | %      |
|---------------------------|-------|--------|
| 1 Almost Every Day        | 46    | 9.68   |
| 2 2-3 Times a Week        | 25    | 5.26   |
| 3 Once a week             | 24    | 5.05   |
| 4 Every Two Weeks         | 31    | 6.53   |
| 5 Once a Month            | 54    | 11.37  |
| 6 Once Every Three Months | 60    | 12.63  |
| 7 Once Every Six Months   | 62    | 13.05  |
| 8 Once a Year             | 89    | 18.74  |
| 9 Almost Never            | 46    | 9.68   |
| 10 Other                  | 38    | 8.00   |
| Total                     | 475   | 100.00 |

**ca015\_7\_:** Frequency See XChildPanAliveName[7]

|                           | Freq. | %     |
|---------------------------|-------|-------|
| 1 Almost Every Day        | 20    | 9.35  |
| 2 2-3 Times a Week        | 4     | 1.87  |
| 3 Once a week             | 14    | 6.54  |
| 4 Every Two Weeks         | 18    | 8.41  |
| 5 Once a Month            | 31    | 14.49 |
| 6 Once Every Three Months | 16    | 7.48  |



|                         |     |        |
|-------------------------|-----|--------|
| 7 Once Every Six Months | 39  | 18.22  |
| 8 Once a Year           | 43  | 20.09  |
| 9 Almost Never          | 18  | 8.41   |
| 10 Other                | 11  | 5.14   |
| Total                   | 214 | 100.00 |

**ca015\_8\_:** Frequency See XChildPanAliveName[8]

|                           | Freq. | %      |
|---------------------------|-------|--------|
| 1 Almost Every Day        | 2     | 2.30   |
| 2 2-3 Times a Week        | 10    | 11.49  |
| 3 Once a week             | 5     | 5.75   |
| 4 Every Two Weeks         | 9     | 10.34  |
| 5 Once a Month            | 7     | 8.05   |
| 6 Once Every Three Months | 15    | 17.24  |
| 7 Once Every Six Months   | 13    | 14.94  |
| 8 Once a Year             | 15    | 17.24  |
| 9 Almost Never            | 7     | 8.05   |
| 10 Other                  | 4     | 4.60   |
| Total                     | 87    | 100.00 |

**ca015\_9\_:** Frequency See XChildPanAliveName[9]

|                           | Freq. | %      |
|---------------------------|-------|--------|
| 1 Almost Every Day        | 1     | 2.94   |
| 2 2-3 Times a Week        | 3     | 8.82   |
| 3 Once a week             | 3     | 8.82   |
| 4 Every Two Weeks         | 3     | 8.82   |
| 5 Once a Month            | 2     | 5.88   |
| 6 Once Every Three Months | 8     | 23.53  |
| 7 Once Every Six Months   | 3     | 8.82   |
| 8 Once a Year             | 8     | 23.53  |
| 9 Almost Never            | 1     | 2.94   |
| 10 Other                  | 2     | 5.88   |
| Total                     | 34    | 100.00 |

**ca015\_10\_:** Frequency See XChildPanAliveName[10]

|                           | Freq. | %      |
|---------------------------|-------|--------|
| 1 Almost Every Day        | 2     | 11.11  |
| 3 Once a week             | 1     | 5.56   |
| 4 Every Two Weeks         | 1     | 5.56   |
| 5 Once a Month            | 3     | 16.67  |
| 6 Once Every Three Months | 3     | 16.67  |
| 7 Once Every Six Months   | 1     | 5.56   |
| 8 Once a Year             | 6     | 33.33  |
| 10 Other                  | 1     | 5.56   |
| Total                     | 18    | 100.00 |

**ca015\_11\_:** Frequency See XChildPanAliveName[11]

|                    | Freq. | %     |
|--------------------|-------|-------|
| 1 Almost Every Day | 1     | 12.50 |

|                           |   |        |
|---------------------------|---|--------|
| 2 2-3 Times a Week        | 1 | 12.50  |
| 3 Once a week             | 1 | 12.50  |
| 4 Every Two Weeks         | 1 | 12.50  |
| 5 Once a Month            | 1 | 12.50  |
| 6 Once Every Three Months | 1 | 12.50  |
| 10 Other                  | 2 | 25.00  |
| Total                     | 8 | 100.00 |

**ca015\_12\_:** Frequency See XChildPanAliveName[12]

|                | Freq. | %      |
|----------------|-------|--------|
| 3 Once a week  | 1     | 33.33  |
| 5 Once a Month | 1     | 33.33  |
| 8 Once a Year  | 1     | 33.33  |
| Total          | 3     | 100.00 |

**ca015\_13\_:** Frequency See XChildPanAliveName[13]

|                 |
|-----------------|
| No Observations |
|-----------------|

**ca015\_14\_:** Frequency See XChildPanAliveName[14]

|                 |
|-----------------|
| No Observations |
|-----------------|

**ca015\_15\_:** Frequency See XChildPanAliveName[15]

|                 |
|-----------------|
| No Observations |
|-----------------|

**ca015\_16\_:** Frequency See XChildPanAliveName[16]

|                 |
|-----------------|
| No Observations |
|-----------------|

**ca015\_17\_:** Frequency See XChildPanAliveName[17]

|                   | Freq. | %      |
|-------------------|-------|--------|
| 4 Every Two Weeks | 1     | 100.00 |
| Total             | 1     | 100.00 |

**ca016\_1\_:** Contact With XChildPanAliveName[1] By Phone/Message/Wechat/Mail/Email

|                           | Freq. | %     |
|---------------------------|-------|-------|
| 1 Almost Every Day        | 818   | 13.39 |
| 2 2-3 Times a Week        | 1,078 | 17.65 |
| 3 Once a week             | 1,275 | 20.87 |
| 4 Every Two Weeks         | 945   | 15.47 |
| 5 Once a Month            | 803   | 13.15 |
| 6 Once Every Three Months | 284   | 4.65  |
| 7 Once Every Six Months   | 105   | 1.72  |
| 8 Once a Year             | 25    | 0.41  |
| 9 Almost Never            | 494   | 8.09  |

|          |       |        |
|----------|-------|--------|
| 10 Other | 281   | 4.60   |
| Total    | 6,108 | 100.00 |

**ca016\_2\_:** Contact With XChildPanAliveName[2] By Phone/Message/Wechat/Mail/Email

|                           | Freq. | %      |
|---------------------------|-------|--------|
| 1 Almost Every Day        | 578   | 10.01  |
| 2 2-3 Times a Week        | 954   | 16.52  |
| 3 Once a week             | 1,164 | 20.16  |
| 4 Every Two Weeks         | 1,008 | 17.45  |
| 5 Once a Month            | 842   | 14.58  |
| 6 Once Every Three Months | 260   | 4.50   |
| 7 Once Every Six Months   | 111   | 1.92   |
| 8 Once a Year             | 36    | 0.62   |
| 9 Almost Never            | 544   | 9.42   |
| 10 Other                  | 278   | 4.81   |
| Total                     | 5,775 | 100.00 |

**ca016\_3\_:** Contact With XChildPanAliveName[3] By Phone/Message/Wechat/Mail/Email

|                           | Freq. | %      |
|---------------------------|-------|--------|
| 1 Almost Every Day        | 206   | 6.21   |
| 2 2-3 Times a Week        | 409   | 12.33  |
| 3 Once a week             | 648   | 19.54  |
| 4 Every Two Weeks         | 595   | 17.94  |
| 5 Once a Month            | 572   | 17.25  |
| 6 Once Every Three Months | 177   | 5.34   |
| 7 Once Every Six Months   | 65    | 1.96   |
| 8 Once a Year             | 27    | 0.81   |
| 9 Almost Never            | 417   | 12.58  |
| 10 Other                  | 200   | 6.03   |
| Total                     | 3,316 | 100.00 |

**ca016\_4\_:** Contact With XChildPanAliveName[4] By Phone/Message/Wechat/Mail/Email

|                           | Freq. | %      |
|---------------------------|-------|--------|
| 1 Almost Every Day        | 121   | 6.69   |
| 2 2-3 Times a Week        | 207   | 11.45  |
| 3 Once a week             | 272   | 15.04  |
| 4 Every Two Weeks         | 281   | 15.54  |
| 5 Once a Month            | 308   | 17.04  |
| 6 Once Every Three Months | 101   | 5.59   |
| 7 Once Every Six Months   | 54    | 2.99   |
| 8 Once a Year             | 19    | 1.05   |
| 9 Almost Never            | 304   | 16.81  |
| 10 Other                  | 141   | 7.80   |
| Total                     | 1,808 | 100.00 |

**ca016\_5\_:** Contact With XChildPanAliveName[5] By Phone/Message/Wechat/Mail/Email

|                           | Freq. | %      |
|---------------------------|-------|--------|
| 1 Almost Every Day        | 50    | 5.71   |
| 2 2-3 Times a Week        | 82    | 9.37   |
| 3 Once a week             | 124   | 14.17  |
| 4 Every Two Weeks         | 131   | 14.97  |
| 5 Once a Month            | 159   | 18.17  |
| 6 Once Every Three Months | 42    | 4.80   |
| 7 Once Every Six Months   | 25    | 2.86   |
| 8 Once a Year             | 4     | 0.46   |
| 9 Almost Never            | 198   | 22.63  |
| 10 Other                  | 60    | 6.86   |
| Total                     | 875   | 100.00 |

**ca016\_6\_:** Contact With XChildPanAliveName[6] By Phone/Message/Wechat/Mail/Email

|                           | Freq. | %      |
|---------------------------|-------|--------|
| 1 Almost Every Day        | 21    | 5.53   |
| 2 2-3 Times a Week        | 35    | 9.21   |
| 3 Once a week             | 38    | 10.00  |
| 4 Every Two Weeks         | 51    | 13.42  |
| 5 Once a Month            | 72    | 18.95  |
| 6 Once Every Three Months | 22    | 5.79   |
| 7 Once Every Six Months   | 13    | 3.42   |
| 8 Once a Year             | 7     | 1.84   |
| 9 Almost Never            | 87    | 22.89  |
| 10 Other                  | 34    | 8.95   |
| Total                     | 380   | 100.00 |

**ca016\_7\_:** Contact With XChildPanAliveName[7] By Phone/Message/Wechat/Mail/Email

|                           | Freq. | %      |
|---------------------------|-------|--------|
| 1 Almost Every Day        | 7     | 3.98   |
| 2 2-3 Times a Week        | 12    | 6.82   |
| 3 Once a week             | 21    | 11.93  |
| 4 Every Two Weeks         | 14    | 7.95   |
| 5 Once a Month            | 31    | 17.61  |
| 6 Once Every Three Months | 6     | 3.41   |
| 7 Once Every Six Months   | 6     | 3.41   |
| 8 Once a Year             | 1     | 0.57   |
| 9 Almost Never            | 63    | 35.80  |
| 10 Other                  | 15    | 8.52   |
| Total                     | 176   | 100.00 |

**ca016\_8\_:** Contact With XChildPanAliveName[8] By Phone/Message/Wechat/Mail/Email

|                    | Freq. | %     |
|--------------------|-------|-------|
| 1 Almost Every Day | 1     | 1.43  |
| 2 2-3 Times a Week | 5     | 7.14  |
| 3 Once a week      | 3     | 4.29  |
| 4 Every Two Weeks  | 12    | 17.14 |
| 5 Once a Month     | 8     | 11.43 |

|                           |    |        |
|---------------------------|----|--------|
| 6 Once Every Three Months | 4  | 5.71   |
| 7 Once Every Six Months   | 5  | 7.14   |
| 8 Once a Year             | 3  | 4.29   |
| 9 Almost Never            | 23 | 32.86  |
| 10 Other                  | 6  | 8.57   |
| Total                     | 70 | 100.00 |

**ca016\_9\_ : Contact With XChildPanAliveName[9] By Phone/Message/Wechat/Mail/Email**

|                           | Freq. | %      |
|---------------------------|-------|--------|
| 2 2-3 Times a Week        | 1     | 3.70   |
| 4 Every Two Weeks         | 4     | 14.81  |
| 5 Once a Month            | 5     | 18.52  |
| 6 Once Every Three Months | 3     | 11.11  |
| 7 Once Every Six Months   | 3     | 11.11  |
| 9 Almost Never            | 9     | 33.33  |
| 10 Other                  | 2     | 7.41   |
| Total                     | 27    | 100.00 |

**ca016\_10\_ : Contact With XChildPanAliveName[10] By Phone/Message/Wechat/Mail/Email**

|                         | Freq. | %      |
|-------------------------|-------|--------|
| 3 Once a week           | 1     | 6.67   |
| 4 Every Two Weeks       | 1     | 6.67   |
| 5 Once a Month          | 3     | 20.00  |
| 7 Once Every Six Months | 1     | 6.67   |
| 9 Almost Never          | 8     | 53.33  |
| 10 Other                | 1     | 6.67   |
| Total                   | 15    | 100.00 |

**ca016\_11\_ : Contact With XChildPanAliveName[11] By Phone/Message/Wechat/Mail/Email**

|                    | Freq. | %      |
|--------------------|-------|--------|
| 1 Almost Every Day | 2     | 40.00  |
| 9 Almost Never     | 2     | 40.00  |
| 10 Other           | 1     | 20.00  |
| Total              | 5     | 100.00 |

**ca016\_12\_ : Contact With XChildPanAliveName[12] By Phone/Message/Wechat/Mail/Email**

|                    | Freq. | %      |
|--------------------|-------|--------|
| 1 Almost Every Day | 1     | 50.00  |
| 9 Almost Never     | 1     | 50.00  |
| Total              | 2     | 100.00 |

**ca016\_13\_ : Contact With XChildPanAliveName[13] By Phone/Message/Wechat/Mail/Email**

---

No Observations

---

**ca016\_14\_:** Contact With XChildPanAliveName[14] By Phone/Message/Wechat/Mail/Email

---

No Observations

---

**ca016\_15\_:** Contact With XChildPanAliveName[15] By Phone/Message/Wechat/Mail/Email

---

No Observations

---

**ca016\_16\_:** Contact With XChildPanAliveName[16] By Phone/Message/Wechat/Mail/Email

---

No Observations

---

**ca016\_17\_:** Contact With XChildPanAliveName[17] By Phone/Message/Wechat/Mail/Email

|                | Freq. | %      |
|----------------|-------|--------|
| 9 Almost Never | 1     | 100.00 |
| Total          | 1     | 100.00 |

**ca017\_1\_1\_:** Total Money Received From XChildPanAliveName[1]

| Mean     | SD       | Min  | Max        | Obs   |
|----------|----------|------|------------|-------|
| 2,339.03 | 7,686.55 | 0.00 | 300,000.00 | 8,136 |

**ca017\_1\_2\_:** Total Money Received From XChildPanAliveName[2]

| Mean     | SD       | Min  | Max        | Obs   |
|----------|----------|------|------------|-------|
| 1,771.21 | 5,834.90 | 0.00 | 203,000.00 | 7,569 |

**ca017\_1\_3\_:** Total Money Received From XChildPanAliveName[3]

| Mean     | SD       | Min  | Max        | Obs   |
|----------|----------|------|------------|-------|
| 1,418.26 | 5,223.25 | 0.00 | 200,000.00 | 4,349 |

**ca017\_1\_4\_:** Total Money Received From XChildPanAliveName[4]

| Mean     | SD       | Min  | Max        | Obs   |
|----------|----------|------|------------|-------|
| 1,295.43 | 5,395.10 | 0.00 | 200,000.00 | 2,281 |

**ca017\_1\_5\_:** Total Money Received From XChildPanAliveName[5]

| Mean   | SD       | Min  | Max       | Obs   |
|--------|----------|------|-----------|-------|
| 969.49 | 2,698.02 | 0.00 | 60,000.00 | 1,085 |

**ca017\_1\_6\_:** Total Money Received From XChildPanAliveName[6]

| Mean   | SD       | Min  | Max       | Obs |
|--------|----------|------|-----------|-----|
| 724.95 | 2,025.85 | 0.00 | 24,000.00 | 461 |

**ca017\_1\_7\_:** Total Money Received From XChildPanAliveName[7]

| Mean   | SD       | Min  | Max       | Obs |
|--------|----------|------|-----------|-----|
| 976.18 | 3,422.82 | 0.00 | 40,000.00 | 207 |

**ca017\_1\_8\_:** Total Money Received From XChildPanAliveName[8]

| Mean   | SD       | Min  | Max       | Obs |
|--------|----------|------|-----------|-----|
| 797.59 | 2,731.17 | 0.00 | 24,000.00 | 83  |

**ca017\_1\_9\_:** Total Money Received From XChildPanAliveName[9]

| Mean   | SD     | Min  | Max      | Obs |
|--------|--------|------|----------|-----|
| 466.67 | 651.76 | 0.00 | 2,000.00 | 33  |

**ca017\_1\_10\_:** Total Money Received From XChildPanAliveName[10]

| Mean   | SD     | Min  | Max      | Obs |
|--------|--------|------|----------|-----|
| 483.33 | 651.02 | 0.00 | 2,000.00 | 18  |

**ca017\_1\_11\_:** Total Money Received From XChildPanAliveName[11]

| Mean     | SD       | Min  | Max      | Obs |
|----------|----------|------|----------|-----|
| 1,228.57 | 1,402.04 | 0.00 | 4,000.00 | 7   |

**ca017\_1\_12\_:** Total Money Received From XChildPanAliveName[12]

| Mean     | SD       | Min  | Max      | Obs |
|----------|----------|------|----------|-----|
| 1,500.00 | 1,322.88 | 0.00 | 2,500.00 | 3   |

**ca017\_1\_13\_:** Total Money Received From XChildPanAliveName[13]

|                 |  |  |  |  |
|-----------------|--|--|--|--|
| No Observations |  |  |  |  |
|-----------------|--|--|--|--|

**ca017\_1\_14\_:** Total Money Received From XChildPanAliveName[14]

|                 |  |  |  |  |
|-----------------|--|--|--|--|
| No Observations |  |  |  |  |
|-----------------|--|--|--|--|

**ca017\_1\_15\_:** Total Money Received From XChildPanAliveName[15]

No Observations

**ca017\_1\_16\_:** Total Money Received From XChildPanAliveName[16]

No Observations

**ca017\_1\_17\_:** Total Money Received From XChildPanAliveName[17]

No Observations

**ca017\_1\_min\_1\_:** Min Bracket of ca017\_1\_1\_

| Mean     | SD       | Min   | Max       | Obs |
|----------|----------|-------|-----------|-----|
| 2,338.78 | 4,280.04 | -1.00 | 20,000.00 | 174 |

**ca017\_1\_min\_2\_:** Min Bracket of ca017\_1\_2\_

| Mean     | SD       | Min   | Max       | Obs |
|----------|----------|-------|-----------|-----|
| 1,688.56 | 3,638.36 | -1.00 | 20,000.00 | 162 |

**ca017\_1\_min\_3\_:** Min Bracket of ca017\_1\_3\_

| Mean     | SD       | Min   | Max       | Obs |
|----------|----------|-------|-----------|-----|
| 1,415.12 | 3,119.80 | -1.00 | 20,000.00 | 97  |

**ca017\_1\_min\_4\_:** Min Bracket of ca017\_1\_4\_

| Mean   | SD     | Min   | Max      | Obs |
|--------|--------|-------|----------|-----|
| 570.08 | 989.57 | -1.00 | 5,000.00 | 61  |

**ca017\_1\_min\_5\_:** Min Bracket of ca017\_1\_5\_

| Mean   | SD     | Min   | Max      | Obs |
|--------|--------|-------|----------|-----|
| 442.90 | 576.71 | -1.00 | 1,500.00 | 30  |

**ca017\_1\_min\_6\_:** Min Bracket of ca017\_1\_6\_

| Mean   | SD     | Min   | Max    | Obs |
|--------|--------|-------|--------|-----|
| 128.00 | 205.81 | -1.00 | 500.00 | 14  |

**ca017\_1\_min\_7\_:** Min Bracket of ca017\_1\_7\_

| Mean  | SD     | Min   | Max    | Obs |
|-------|--------|-------|--------|-----|
| 99.43 | 182.94 | -1.00 | 500.00 | 7   |



**ca017\_1\_min\_8\_:** Min Bracket of ca017\_1\_8\_

| Mean  | SD   | Min   | Max   | Obs |
|-------|------|-------|-------|-----|
| -1.00 | 0.00 | -1.00 | -1.00 | 4   |

**ca017\_1\_min\_9\_:** Min Bracket of ca017\_1\_9\_

| Mean  | SD | Min   | Max   | Obs |
|-------|----|-------|-------|-----|
| -1.00 | .  | -1.00 | -1.00 | 1   |

**ca017\_1\_min\_10\_:** Min Bracket of ca017\_1\_10\_

|                 |  |  |  |  |
|-----------------|--|--|--|--|
| No Observations |  |  |  |  |
|-----------------|--|--|--|--|

**ca017\_1\_min\_11\_:** Min Bracket of ca017\_1\_11\_

| Mean   | SD | Min    | Max    | Obs |
|--------|----|--------|--------|-----|
| 100.00 | .  | 100.00 | 100.00 | 1   |

**ca017\_1\_min\_12\_:** Min Bracket of ca017\_1\_12\_

|                 |  |  |  |  |
|-----------------|--|--|--|--|
| No Observations |  |  |  |  |
|-----------------|--|--|--|--|

**ca017\_1\_min\_13\_:** Min Bracket of ca017\_1\_13\_

|                 |  |  |  |  |
|-----------------|--|--|--|--|
| No Observations |  |  |  |  |
|-----------------|--|--|--|--|

**ca017\_1\_min\_14\_:** Min Bracket of ca017\_1\_14\_

|                 |  |  |  |  |
|-----------------|--|--|--|--|
| No Observations |  |  |  |  |
|-----------------|--|--|--|--|

**ca017\_1\_min\_15\_:** Min Bracket of ca017\_1\_15\_

|                 |  |  |  |  |
|-----------------|--|--|--|--|
| No Observations |  |  |  |  |
|-----------------|--|--|--|--|

**ca017\_1\_min\_16\_:** Min Bracket of ca017\_1\_16\_

|                 |  |  |  |  |
|-----------------|--|--|--|--|
| No Observations |  |  |  |  |
|-----------------|--|--|--|--|

**ca017\_1\_min\_17\_:** Min Bracket of ca017\_1\_17\_

| Mean  | SD | Min   | Max   | Obs |
|-------|----|-------|-------|-----|
| -1.00 | .  | -1.00 | -1.00 | 1   |

**ca017\_1\_max\_1\_:** Max Bracket of ca017\_1\_1\_

| Mean | SD | Min | Max | Obs |
|------|----|-----|-----|-----|
|------|----|-----|-----|-----|

|          |          |       |           |     |
|----------|----------|-------|-----------|-----|
| 4,228.93 | 6,134.70 | -1.00 | 20,000.00 | 171 |
|----------|----------|-------|-----------|-----|

**ca017\_1\_max\_2\_:** Max Bracket of ca017\_1\_2\_

| Mean     | SD       | Min   | Max       | Obs |
|----------|----------|-------|-----------|-----|
| 3,578.80 | 6,100.68 | -1.00 | 20,000.00 | 163 |

**ca017\_1\_max\_3\_:** Max Bracket of ca017\_1\_3\_

| Mean     | SD       | Min   | Max       | Obs |
|----------|----------|-------|-----------|-----|
| 3,370.09 | 6,269.70 | -1.00 | 20,000.00 | 95  |

**ca017\_1\_max\_4\_:** Max Bracket of ca017\_1\_4\_

| Mean     | SD       | Min   | Max       | Obs |
|----------|----------|-------|-----------|-----|
| 1,307.58 | 2,918.30 | -1.00 | 20,000.00 | 62  |

**ca017\_1\_max\_5\_:** Max Bracket of ca017\_1\_5\_

| Mean     | SD       | Min   | Max       | Obs |
|----------|----------|-------|-----------|-----|
| 1,973.81 | 3,845.98 | -1.00 | 20,000.00 | 31  |

**ca017\_1\_max\_6\_:** Max Bracket of ca017\_1\_6\_

| Mean   | SD     | Min   | Max      | Obs |
|--------|--------|-------|----------|-----|
| 213.57 | 426.20 | -1.00 | 1,500.00 | 14  |

**ca017\_1\_max\_7\_:** Max Bracket of ca017\_1\_7\_

| Mean   | SD     | Min   | Max      | Obs |
|--------|--------|-------|----------|-----|
| 285.00 | 567.37 | -1.00 | 1,500.00 | 7   |

**ca017\_1\_max\_8\_:** Max Bracket of ca017\_1\_8\_

| Mean  | SD   | Min   | Max   | Obs |
|-------|------|-------|-------|-----|
| -1.00 | 0.00 | -1.00 | -1.00 | 4   |

**ca017\_1\_max\_9\_:** Max Bracket of ca017\_1\_9\_

| Mean  | SD | Min   | Max   | Obs |
|-------|----|-------|-------|-----|
| -1.00 | .  | -1.00 | -1.00 | 1   |

**ca017\_1\_max\_10\_:** Max Bracket of ca017\_1\_10\_

|                 |  |  |  |  |
|-----------------|--|--|--|--|
| No Observations |  |  |  |  |
|-----------------|--|--|--|--|

**ca017\_1\_max\_11\_:** Max Bracket of ca017\_1\_11\_

| Mean  | SD | Min   | Max   | Obs |
|-------|----|-------|-------|-----|
| -1.00 | .  | -1.00 | -1.00 | 1   |

**ca017\_1\_max\_12\_:** Max Bracket of ca017\_1\_12\_

|                 |  |  |  |  |
|-----------------|--|--|--|--|
| No Observations |  |  |  |  |
|-----------------|--|--|--|--|

**ca017\_1\_max\_13\_:** Max Bracket of ca017\_1\_13\_

|                 |  |  |  |  |
|-----------------|--|--|--|--|
| No Observations |  |  |  |  |
|-----------------|--|--|--|--|

**ca017\_1\_max\_14\_:** Max Bracket of ca017\_1\_14\_

|                 |  |  |  |  |
|-----------------|--|--|--|--|
| No Observations |  |  |  |  |
|-----------------|--|--|--|--|

**ca017\_1\_max\_15\_:** Max Bracket of ca017\_1\_15\_

|                 |  |  |  |  |
|-----------------|--|--|--|--|
| No Observations |  |  |  |  |
|-----------------|--|--|--|--|

**ca017\_1\_max\_16\_:** Max Bracket of ca017\_1\_16\_

|                 |  |  |  |  |
|-----------------|--|--|--|--|
| No Observations |  |  |  |  |
|-----------------|--|--|--|--|

**ca017\_1\_max\_17\_:** Max Bracket of ca017\_1\_17\_

| Mean  | SD | Min   | Max   | Obs |
|-------|----|-------|-------|-----|
| -1.00 | .  | -1.00 | -1.00 | 1   |

**ca017\_2\_1\_:** Regular Payment Received from XChildPanAliveName[1]

| Mean   | SD       | Min  | Max        | Obs   |
|--------|----------|------|------------|-------|
| 766.56 | 3,827.10 | 0.00 | 120,000.00 | 8,240 |

**ca017\_2\_2\_:** Regular Payment Received from XChildPanAliveName[2]

| Mean   | SD       | Min  | Max       | Obs   |
|--------|----------|------|-----------|-------|
| 574.82 | 2,476.02 | 0.00 | 60,000.00 | 7,673 |

**ca017\_2\_3\_:** Regular Payment Received from XChildPanAliveName[3]

| Mean   | SD       | Min  | Max       | Obs   |
|--------|----------|------|-----------|-------|
| 459.83 | 1,808.81 | 0.00 | 40,000.00 | 4,408 |

**ca017\_2\_4\_:** Regular Payment Received from XChildPanAliveName[4]

| Mean   | SD       | Min  | Max       | Obs   |
|--------|----------|------|-----------|-------|
| 453.01 | 1,986.81 | 0.00 | 36,000.00 | 2,319 |

**ca017\_2\_5\_:** Regular Payment Received from XChildPanAliveName[5]

| Mean   | SD     | Min  | Max       | Obs   |
|--------|--------|------|-----------|-------|
| 232.94 | 861.73 | 0.00 | 18,000.00 | 1,105 |

**ca017\_2\_6\_:** Regular Payment Received from XChildPanAliveName[6]

| Mean   | SD       | Min  | Max       | Obs |
|--------|----------|------|-----------|-----|
| 239.08 | 1,254.92 | 0.00 | 24,000.00 | 468 |

**ca017\_2\_7\_:** Regular Payment Received from XChildPanAliveName[7]

| Mean   | SD       | Min  | Max       | Obs |
|--------|----------|------|-----------|-----|
| 539.38 | 2,994.28 | 0.00 | 40,000.00 | 210 |

**ca017\_2\_8\_:** Regular Payment Received from XChildPanAliveName[8]

| Mean   | SD       | Min  | Max       | Obs |
|--------|----------|------|-----------|-----|
| 427.59 | 2,587.52 | 0.00 | 24,000.00 | 87  |

**ca017\_2\_9\_:** Regular Payment Received from XChildPanAliveName[9]

| Mean   | SD     | Min  | Max      | Obs |
|--------|--------|------|----------|-----|
| 166.67 | 409.78 | 0.00 | 2,000.00 | 33  |

**ca017\_2\_10\_:** Regular Payment Received from XChildPanAliveName[10]

| Mean   | SD     | Min  | Max      | Obs |
|--------|--------|------|----------|-----|
| 150.00 | 478.05 | 0.00 | 2,000.00 | 18  |

**ca017\_2\_11\_:** Regular Payment Received from XChildPanAliveName[11]

| Mean   | SD     | Min  | Max    | Obs |
|--------|--------|------|--------|-----|
| 185.71 | 328.78 | 0.00 | 800.00 | 7   |

**ca017\_2\_12\_:** Regular Payment Received from XChildPanAliveName[12]

| Mean   | SD     | Min  | Max    | Obs |
|--------|--------|------|--------|-----|
| 266.67 | 461.88 | 0.00 | 800.00 | 3   |

**ca017\_2\_13\_:** Regular Payment Received from XChildPanAliveName[13]

|                 |
|-----------------|
| No Observations |
|-----------------|

ca017\_2\_14\_: Regular Payment Received from XChildPanAliveName[14]

|                 |
|-----------------|
| No Observations |
|-----------------|

ca017\_2\_15\_: Regular Payment Received from XChildPanAliveName[15]

|                 |
|-----------------|
| No Observations |
|-----------------|

ca017\_2\_16\_: Regular Payment Received from XChildPanAliveName[16]

|                 |
|-----------------|
| No Observations |
|-----------------|

ca017\_2\_17\_: Regular Payment Received from XChildPanAliveName[17]

| Mean | SD | Min  | Max  | Obs |
|------|----|------|------|-----|
| 0.00 | .  | 0.00 | 0.00 | 1   |

ca017\_2\_min\_1\_: Min Bracket of ca017\_2\_1\_

| Mean   | SD       | Min   | Max       | Obs |
|--------|----------|-------|-----------|-----|
| 693.73 | 1,482.32 | -1.00 | 10,000.00 | 70  |

ca017\_2\_min\_2\_: Min Bracket of ca017\_2\_2\_

| Mean   | SD       | Min   | Max       | Obs |
|--------|----------|-------|-----------|-----|
| 397.68 | 1,426.63 | -1.00 | 10,000.00 | 60  |

ca017\_2\_min\_3\_: Min Bracket of ca017\_2\_3\_

| Mean   | SD     | Min   | Max      | Obs |
|--------|--------|-------|----------|-----|
| 358.81 | 841.40 | -1.00 | 3,000.00 | 37  |

ca017\_2\_min\_4\_: Min Bracket of ca017\_2\_4\_

| Mean   | SD     | Min   | Max      | Obs |
|--------|--------|-------|----------|-----|
| 190.88 | 634.02 | -1.00 | 3,000.00 | 24  |

ca017\_2\_min\_5\_: Min Bracket of ca017\_2\_5\_

| Mean   | SD     | Min   | Max      | Obs |
|--------|--------|-------|----------|-----|
| 281.00 | 902.30 | -1.00 | 3,000.00 | 11  |

ca017\_2\_min\_6\_: Min Bracket of ca017\_2\_6\_

| Mean  | SD    | Min   | Max    | Obs |
|-------|-------|-------|--------|-----|
| 56.43 | 98.08 | -1.00 | 200.00 | 7   |

**ca017\_2\_min\_7\_:** Min Bracket of ca017\_2\_7\_

| Mean   | SD     | Min   | Max      | Obs |
|--------|--------|-------|----------|-----|
| 299.50 | 476.52 | -1.00 | 1,000.00 | 4   |

**ca017\_2\_min\_8\_:** Min Bracket of ca017\_2\_8\_

|                 |  |  |  |  |
|-----------------|--|--|--|--|
| No Observations |  |  |  |  |
|-----------------|--|--|--|--|

**ca017\_2\_min\_9\_:** Min Bracket of ca017\_2\_9\_

| Mean  | SD | Min   | Max   | Obs |
|-------|----|-------|-------|-----|
| -1.00 | .  | -1.00 | -1.00 | 1   |

**ca017\_2\_min\_10\_:** Min Bracket of ca017\_2\_10\_

|                 |  |  |  |  |
|-----------------|--|--|--|--|
| No Observations |  |  |  |  |
|-----------------|--|--|--|--|

**ca017\_2\_min\_11\_:** Min Bracket of ca017\_2\_11\_

| Mean  | SD | Min   | Max   | Obs |
|-------|----|-------|-------|-----|
| -1.00 | .  | -1.00 | -1.00 | 1   |

**ca017\_2\_max\_1\_:** Max Bracket of ca017\_2\_1\_

| Mean     | SD       | Min   | Max       | Obs |
|----------|----------|-------|-----------|-----|
| 1,734.22 | 3,125.56 | -1.00 | 10,000.00 | 72  |

**ca017\_2\_max\_2\_:** Max Bracket of ca017\_2\_2\_

| Mean   | SD       | Min   | Max       | Obs |
|--------|----------|-------|-----------|-----|
| 455.98 | 1,436.71 | -1.00 | 10,000.00 | 60  |

**ca017\_2\_max\_3\_:** Max Bracket of ca017\_2\_3\_

| Mean     | SD       | Min   | Max       | Obs |
|----------|----------|-------|-----------|-----|
| 1,270.45 | 2,754.44 | -1.00 | 10,000.00 | 38  |

**ca017\_2\_max\_4\_:** Max Bracket of ca017\_2\_4\_

| Mean   | SD       | Min   | Max       | Obs |
|--------|----------|-------|-----------|-----|
| 624.17 | 2,102.28 | -1.00 | 10,000.00 | 24  |

**ca017\_2\_max\_5\_:** Max Bracket of ca017\_2\_5\_

| Mean   | SD     | Min   | Max      | Obs |
|--------|--------|-------|----------|-----|
| 290.09 | 900.80 | -1.00 | 3,000.00 | 11  |

**ca017\_2\_max\_6\_:** Max Bracket of ca017\_2\_6\_

| Mean   | SD     | Min   | Max      | Obs |
|--------|--------|-------|----------|-----|
| 142.00 | 378.34 | -1.00 | 1,000.00 | 7   |

**ca017\_2\_max\_7\_:** Max Bracket of ca017\_2\_7\_

| Mean   | SD       | Min   | Max      | Obs |
|--------|----------|-------|----------|-----|
| 749.25 | 1,500.50 | -1.00 | 3,000.00 | 4   |

**ca017\_2\_max\_8\_:** Max Bracket of ca017\_2\_8\_

|                 |  |  |  |  |
|-----------------|--|--|--|--|
| No Observations |  |  |  |  |
|-----------------|--|--|--|--|

**ca017\_2\_max\_9\_:** Max Bracket of ca017\_2\_9\_

| Mean  | SD | Min   | Max   | Obs |
|-------|----|-------|-------|-----|
| -1.00 | .  | -1.00 | -1.00 | 1   |

**ca017\_2\_max\_10\_:** Max Bracket of ca017\_2\_10\_

|                 |  |  |  |  |
|-----------------|--|--|--|--|
| No Observations |  |  |  |  |
|-----------------|--|--|--|--|

**ca017\_2\_max\_11\_:** Max Bracket of ca017\_2\_11\_

| Mean  | SD | Min   | Max   | Obs |
|-------|----|-------|-------|-----|
| -1.00 | .  | -1.00 | -1.00 | 1   |

**ca017\_3\_1\_:** Total In-kind Payment Received From XChildPanAliveName[1]

| Mean     | SD       | Min  | Max        | Obs   |
|----------|----------|------|------------|-------|
| 1,197.86 | 3,159.09 | 0.00 | 130,000.00 | 7,762 |

**ca017\_3\_2\_:** Total In-kind Payment Received From XChildPanAliveName[2]

| Mean   | SD       | Min  | Max        | Obs   |
|--------|----------|------|------------|-------|
| 878.75 | 2,305.63 | 0.00 | 102,200.00 | 7,261 |

**ca017\_3\_3\_:** Total In-kind Payment Received From XChildPanAliveName[3]

| Mean | SD | Min | Max | Obs |
|------|----|-----|-----|-----|
|------|----|-----|-----|-----|

|        |          |      |            |       |
|--------|----------|------|------------|-------|
| 793.70 | 4,735.50 | 0.00 | 260,000.00 | 4,155 |
|--------|----------|------|------------|-------|

**ca017\_3\_4\_:** Total In-kind Payment Received From XChildPanAliveName[4]

| Mean   | SD       | Min  | Max       | Obs   |
|--------|----------|------|-----------|-------|
| 567.75 | 1,166.38 | 0.00 | 20,000.00 | 2,170 |

**ca017\_3\_5\_:** Total In-kind Payment Received From XChildPanAliveName[5]

| Mean   | SD       | Min  | Max       | Obs   |
|--------|----------|------|-----------|-------|
| 502.84 | 1,073.11 | 0.00 | 10,000.00 | 1,037 |

**ca017\_3\_6\_:** Total In-kind Payment Received From XChildPanAliveName[6]

| Mean   | SD     | Min  | Max      | Obs |
|--------|--------|------|----------|-----|
| 370.70 | 736.81 | 0.00 | 6,000.00 | 446 |

**ca017\_3\_7\_:** Total In-kind Payment Received From XChildPanAliveName[7]

| Mean   | SD     | Min  | Max      | Obs |
|--------|--------|------|----------|-----|
| 318.91 | 700.44 | 0.00 | 5,000.00 | 198 |

**ca017\_3\_8\_:** Total In-kind Payment Received From XChildPanAliveName[8]

| Mean   | SD       | Min  | Max       | Obs |
|--------|----------|------|-----------|-----|
| 539.07 | 2,243.64 | 0.00 | 20,000.00 | 81  |

**ca017\_3\_9\_:** Total In-kind Payment Received From XChildPanAliveName[9]

| Mean   | SD     | Min  | Max      | Obs |
|--------|--------|------|----------|-----|
| 160.18 | 293.15 | 0.00 | 1,200.00 | 28  |

**ca017\_3\_10\_:** Total In-kind Payment Received From XChildPanAliveName[10]

| Mean   | SD     | Min  | Max      | Obs |
|--------|--------|------|----------|-----|
| 336.39 | 553.13 | 0.00 | 2,000.00 | 18  |

**ca017\_3\_11\_:** Total In-kind Payment Received From XChildPanAliveName[11]

| Mean   | SD     | Min  | Max      | Obs |
|--------|--------|------|----------|-----|
| 700.00 | 946.57 | 0.00 | 2,500.00 | 6   |

**ca017\_3\_12\_:** Total In-kind Payment Received From XChildPanAliveName[12]

| Mean   | SD     | Min  | Max      | Obs |
|--------|--------|------|----------|-----|
| 433.33 | 513.16 | 0.00 | 1,000.00 | 3   |



**ca017\_3\_13\_:** Total In-kind Payment Received From XChildPanAliveName[13]

|                 |
|-----------------|
| No Observations |
|-----------------|

**ca017\_3\_14\_:** Total In-kind Payment Received From XChildPanAliveName[14]

|                 |
|-----------------|
| No Observations |
|-----------------|

**ca017\_3\_15\_:** Total In-kind Payment Received From XChildPanAliveName[15]

|                 |
|-----------------|
| No Observations |
|-----------------|

**ca017\_3\_16\_:** Total In-kind Payment Received From XChildPanAliveName[16]

|                 |
|-----------------|
| No Observations |
|-----------------|

**ca017\_3\_17\_:** Total In-kind Payment Received From XChildPanAliveName[17]

|                 |
|-----------------|
| No Observations |
|-----------------|

**ca017\_3\_min\_1\_:** Min Bracket of ca017\_3\_1\_

| Mean     | SD       | Min   | Max       | Obs |
|----------|----------|-------|-----------|-----|
| 1,452.44 | 2,982.85 | -1.00 | 20,000.00 | 528 |

**ca017\_3\_min\_2\_:** Min Bracket of ca017\_3\_2\_

| Mean     | SD       | Min   | Max       | Obs |
|----------|----------|-------|-----------|-----|
| 1,012.21 | 2,497.51 | -1.00 | 20,000.00 | 464 |

**ca017\_3\_min\_3\_:** Min Bracket of ca017\_3\_3\_

| Mean   | SD       | Min   | Max       | Obs |
|--------|----------|-------|-----------|-----|
| 817.58 | 2,028.50 | -1.00 | 20,000.00 | 285 |

**ca017\_3\_min\_4\_:** Min Bracket of ca017\_3\_4\_

| Mean   | SD       | Min   | Max       | Obs |
|--------|----------|-------|-----------|-----|
| 686.59 | 1,858.29 | -1.00 | 20,000.00 | 169 |

**ca017\_3\_min\_5\_:** Min Bracket of ca017\_3\_5\_

| Mean   | SD     | Min   | Max      | Obs |
|--------|--------|-------|----------|-----|
| 352.95 | 698.52 | -1.00 | 5,000.00 | 75  |

**ca017\_3\_min\_6\_:** Min Bracket of ca017\_3\_6\_

| Mean   | SD     | Min   | Max      | Obs |
|--------|--------|-------|----------|-----|
| 454.76 | 987.83 | -1.00 | 5,000.00 | 29  |

**ca017\_3\_min\_7\_:** Min Bracket of ca017\_3\_7\_

| Mean   | SD     | Min   | Max      | Obs |
|--------|--------|-------|----------|-----|
| 274.63 | 394.40 | -1.00 | 1,500.00 | 16  |

**ca017\_3\_min\_8\_:** Min Bracket of ca017\_3\_8\_

| Mean   | SD     | Min   | Max      | Obs |
|--------|--------|-------|----------|-----|
| 349.50 | 596.17 | -1.00 | 1,500.00 | 6   |

**ca017\_3\_min\_9\_:** Min Bracket of ca017\_3\_9\_

| Mean   | SD     | Min   | Max    | Obs |
|--------|--------|-------|--------|-----|
| 133.00 | 186.48 | -1.00 | 500.00 | 6   |

**ca017\_3\_min\_10\_:** Min Bracket of ca017\_3\_10\_

|                 |  |  |  |  |
|-----------------|--|--|--|--|
| No Observations |  |  |  |  |
|-----------------|--|--|--|--|

**ca017\_3\_min\_11\_:** Min Bracket of ca017\_3\_11\_

| Mean   | SD       | Min   | Max      | Obs |
|--------|----------|-------|----------|-----|
| 749.50 | 1,061.37 | -1.00 | 1,500.00 | 2   |

**ca017\_3\_min\_12\_:** Min Bracket of ca017\_3\_12\_

|                 |  |  |  |  |
|-----------------|--|--|--|--|
| No Observations |  |  |  |  |
|-----------------|--|--|--|--|

**ca017\_3\_min\_13\_:** Min Bracket of ca017\_3\_13\_

|                 |  |  |  |  |
|-----------------|--|--|--|--|
| No Observations |  |  |  |  |
|-----------------|--|--|--|--|

**ca017\_3\_min\_14\_:** Min Bracket of ca017\_3\_14\_

|                 |  |  |  |  |
|-----------------|--|--|--|--|
| No Observations |  |  |  |  |
|-----------------|--|--|--|--|

**ca017\_3\_min\_15\_:** Min Bracket of ca017\_3\_15\_

|                 |  |  |  |  |
|-----------------|--|--|--|--|
| No Observations |  |  |  |  |
|-----------------|--|--|--|--|

**ca017\_3\_min\_16\_:** Min Bracket of ca017\_3\_16\_

No Observations

**ca017\_3\_min\_17\_:** Min Bracket of ca017\_3\_17\_

| Mean  | SD | Min   | Max   | Obs |
|-------|----|-------|-------|-----|
| -1.00 | .  | -1.00 | -1.00 | 1   |

**ca017\_3\_max\_1\_:** Max Bracket of ca017\_3\_1\_

| Mean     | SD       | Min   | Max       | Obs |
|----------|----------|-------|-----------|-----|
| 2,923.32 | 5,079.80 | -1.00 | 20,000.00 | 548 |

**ca017\_3\_max\_2\_:** Max Bracket of ca017\_3\_2\_

| Mean     | SD       | Min   | Max       | Obs |
|----------|----------|-------|-----------|-----|
| 2,240.06 | 4,526.31 | -1.00 | 20,000.00 | 471 |

**ca017\_3\_max\_3\_:** Max Bracket of ca017\_3\_3\_

| Mean     | SD       | Min   | Max       | Obs |
|----------|----------|-------|-----------|-----|
| 2,152.25 | 4,588.72 | -1.00 | 20,000.00 | 293 |

**ca017\_3\_max\_4\_:** Max Bracket of ca017\_3\_4\_

| Mean     | SD       | Min   | Max       | Obs |
|----------|----------|-------|-----------|-----|
| 1,471.13 | 3,275.25 | -1.00 | 20,000.00 | 172 |

**ca017\_3\_max\_5\_:** Max Bracket of ca017\_3\_5\_

| Mean   | SD       | Min   | Max      | Obs |
|--------|----------|-------|----------|-----|
| 792.04 | 1,320.46 | -1.00 | 5,000.00 | 79  |

**ca017\_3\_max\_6\_:** Max Bracket of ca017\_3\_6\_

| Mean   | SD       | Min   | Max      | Obs |
|--------|----------|-------|----------|-----|
| 892.62 | 1,718.43 | -1.00 | 5,000.00 | 29  |

**ca017\_3\_max\_7\_:** Max Bracket of ca017\_3\_7\_

| Mean   | SD       | Min   | Max      | Obs |
|--------|----------|-------|----------|-----|
| 536.94 | 1,255.58 | -1.00 | 5,000.00 | 16  |

**ca017\_3\_max\_8\_:** Max Bracket of ca017\_3\_8\_

| Mean | SD | Min | Max | Obs |
|------|----|-----|-----|-----|
|------|----|-----|-----|-----|

|        |        |       |          |   |
|--------|--------|-------|----------|---|
| 416.17 | 584.95 | -1.00 | 1,500.00 | 6 |
|--------|--------|-------|----------|---|

**ca017\_3\_max\_9\_:** Max Bracket of ca017\_3\_9\_

| Mean     | SD       | Min   | Max      | Obs |
|----------|----------|-------|----------|-----|
| 1,199.83 | 1,943.32 | -1.00 | 5,000.00 | 6   |

**ca017\_3\_max\_10\_:** Max Bracket of ca017\_3\_10\_

|                 |
|-----------------|
| No Observations |
|-----------------|

**ca017\_3\_max\_11\_:** Max Bracket of ca017\_3\_11\_

| Mean     | SD        | Min   | Max       | Obs |
|----------|-----------|-------|-----------|-----|
| 9,999.50 | 14,142.84 | -1.00 | 20,000.00 | 2   |

**ca017\_3\_max\_12\_:** Max Bracket of ca017\_3\_12\_

|                 |
|-----------------|
| No Observations |
|-----------------|

**ca017\_3\_max\_13\_:** Max Bracket of ca017\_3\_13\_

|                 |
|-----------------|
| No Observations |
|-----------------|

**ca017\_3\_max\_14\_:** Max Bracket of ca017\_3\_14\_

|                 |
|-----------------|
| No Observations |
|-----------------|

**ca017\_3\_max\_15\_:** Max Bracket of ca017\_3\_15\_

|                 |
|-----------------|
| No Observations |
|-----------------|

**ca017\_3\_max\_16\_:** Max Bracket of ca017\_3\_16\_

|                 |
|-----------------|
| No Observations |
|-----------------|

**ca017\_3\_max\_17\_:** Max Bracket of ca017\_3\_17\_

| Mean  | SD | Min   | Max   | Obs |
|-------|----|-------|-------|-----|
| -1.00 | .  | -1.00 | -1.00 | 1   |

**ca017\_4\_1\_:** Regular In-kind Payment Received From XChildPanAliveName[1]

| Mean   | SD       | Min  | Max       | Obs   |
|--------|----------|------|-----------|-------|
| 196.41 | 1,451.40 | 0.00 | 95,200.00 | 8,196 |

**ca017\_4\_2\_:** Regular In-kind Payment Received From XChildPanAliveName[2]

| Mean   | SD       | Min  | Max        | Obs   |
|--------|----------|------|------------|-------|
| 155.25 | 1,395.95 | 0.00 | 102,200.00 | 7,634 |

**ca017\_4\_3\_:** Regular In-kind Payment Received From XChildPanAliveName[3]

| Mean   | SD       | Min  | Max       | Obs   |
|--------|----------|------|-----------|-------|
| 140.74 | 1,094.53 | 0.00 | 36,000.00 | 4,383 |

**ca017\_4\_4\_:** Regular In-kind Payment Received From XChildPanAliveName[4]

| Mean  | SD     | Min  | Max      | Obs   |
|-------|--------|------|----------|-------|
| 92.14 | 442.90 | 0.00 | 8,000.00 | 2,294 |

**ca017\_4\_5\_:** Regular In-kind Payment Received From XChildPanAliveName[5]

| Mean  | SD     | Min  | Max      | Obs   |
|-------|--------|------|----------|-------|
| 66.57 | 294.80 | 0.00 | 4,000.00 | 1,100 |

**ca017\_4\_6\_:** Regular In-kind Payment Received From XChildPanAliveName[6]

| Mean  | SD     | Min  | Max      | Obs |
|-------|--------|------|----------|-----|
| 53.07 | 243.39 | 0.00 | 3,600.00 | 463 |

**ca017\_4\_7\_:** Regular In-kind Payment Received From XChildPanAliveName[7]

| Mean  | SD     | Min  | Max      | Obs |
|-------|--------|------|----------|-----|
| 64.64 | 364.96 | 0.00 | 5,000.00 | 210 |

**ca017\_4\_8\_:** Regular In-kind Payment Received From XChildPanAliveName[8]

| Mean  | SD     | Min  | Max      | Obs |
|-------|--------|------|----------|-----|
| 61.98 | 253.80 | 0.00 | 2,000.00 | 86  |

**ca017\_4\_9\_:** Regular In-kind Payment Received From XChildPanAliveName[9]

| Mean  | SD    | Min  | Max    | Obs |
|-------|-------|------|--------|-----|
| 20.00 | 59.24 | 0.00 | 300.00 | 32  |

**ca017\_4\_10\_:** Regular In-kind Payment Received From XChildPanAliveName[10]

| Mean  | SD     | Min  | Max    | Obs |
|-------|--------|------|--------|-----|
| 30.56 | 117.75 | 0.00 | 500.00 | 18  |

**ca017\_4\_11\_:** Regular In-kind Payment Received From XChildPanAliveName[11]

| Mean | SD   | Min  | Max  | Obs |
|------|------|------|------|-----|
| 0.00 | 0.00 | 0.00 | 0.00 | 8   |

ca017\_4\_12\_: Regular In-kind Payment Received From XChildPanAliveName[12]

| Mean | SD   | Min  | Max  | Obs |
|------|------|------|------|-----|
| 0.00 | 0.00 | 0.00 | 0.00 | 3   |

ca017\_4\_13\_: Regular In-kind Payment Received From XChildPanAliveName[13]

|                 |  |  |  |  |
|-----------------|--|--|--|--|
| No Observations |  |  |  |  |
|-----------------|--|--|--|--|

ca017\_4\_14\_: Regular In-kind Payment Received From XChildPanAliveName[14]

|                 |  |  |  |  |
|-----------------|--|--|--|--|
| No Observations |  |  |  |  |
|-----------------|--|--|--|--|

ca017\_4\_15\_: Regular In-kind Payment Received From XChildPanAliveName[15]

|                 |  |  |  |  |
|-----------------|--|--|--|--|
| No Observations |  |  |  |  |
|-----------------|--|--|--|--|

ca017\_4\_16\_: Regular In-kind Payment Received From XChildPanAliveName[16]

|                 |  |  |  |  |
|-----------------|--|--|--|--|
| No Observations |  |  |  |  |
|-----------------|--|--|--|--|

ca017\_4\_17\_: Regular In-kind Payment Received From XChildPanAliveName[17]

| Mean | SD | Min  | Max  | Obs |
|------|----|------|------|-----|
| 0.00 | .  | 0.00 | 0.00 | 1   |

ca017\_4\_min\_1\_: Min Bracket of ca017\_4\_1\_

| Mean   | SD       | Min   | Max       | Obs |
|--------|----------|-------|-----------|-----|
| 460.91 | 1,151.46 | -1.00 | 10,000.00 | 114 |

ca017\_4\_min\_2\_: Min Bracket of ca017\_4\_2\_

| Mean   | SD     | Min   | Max      | Obs |
|--------|--------|-------|----------|-----|
| 312.59 | 752.41 | -1.00 | 3,000.00 | 98  |

ca017\_4\_min\_3\_: Min Bracket of ca017\_4\_3\_

| Mean   | SD     | Min   | Max      | Obs |
|--------|--------|-------|----------|-----|
| 231.63 | 379.76 | -1.00 | 1,000.00 | 59  |

ca017\_4\_min\_4\_: Min Bracket of ca017\_4\_4\_

| Mean   | SD       | Min   | Max       | Obs |
|--------|----------|-------|-----------|-----|
| 677.59 | 2,113.98 | -1.00 | 10,000.00 | 46  |

**ca017\_4\_min\_5\_:** Min Bracket of ca017\_4\_5\_

| Mean   | SD     | Min   | Max      | Obs |
|--------|--------|-------|----------|-----|
| 105.56 | 251.89 | -1.00 | 1,000.00 | 16  |

**ca017\_4\_min\_6\_:** Min Bracket of ca017\_4\_6\_

| Mean   | SD     | Min   | Max      | Obs |
|--------|--------|-------|----------|-----|
| 382.75 | 871.89 | -1.00 | 3,000.00 | 12  |

**ca017\_4\_min\_7\_:** Min Bracket of ca017\_4\_7\_

| Mean   | SD     | Min   | Max      | Obs |
|--------|--------|-------|----------|-----|
| 499.50 | 577.93 | -1.00 | 1,000.00 | 4   |

**ca017\_4\_min\_8\_:** Min Bracket of ca017\_4\_8\_

| Mean     | SD | Min      | Max      | Obs |
|----------|----|----------|----------|-----|
| 1,000.00 | .  | 1,000.00 | 1,000.00 | 1   |

**ca017\_4\_min\_9\_:** Min Bracket of ca017\_4\_9\_

| Mean  | SD     | Min   | Max    | Obs |
|-------|--------|-------|--------|-----|
| 99.50 | 142.13 | -1.00 | 200.00 | 2   |

**ca017\_4\_max\_1\_:** Max Bracket of ca017\_4\_1\_

| Mean     | SD       | Min   | Max       | Obs |
|----------|----------|-------|-----------|-----|
| 1,156.92 | 2,179.34 | -1.00 | 10,000.00 | 115 |

**ca017\_4\_max\_2\_:** Max Bracket of ca017\_4\_2\_

| Mean   | SD       | Min   | Max       | Obs |
|--------|----------|-------|-----------|-----|
| 537.71 | 1,580.51 | -1.00 | 10,000.00 | 99  |

**ca017\_4\_max\_3\_:** Max Bracket of ca017\_4\_3\_

| Mean   | SD     | Min   | Max      | Obs |
|--------|--------|-------|----------|-----|
| 437.54 | 785.14 | -1.00 | 3,000.00 | 63  |

**ca017\_4\_max\_4\_:** Max Bracket of ca017\_4\_4\_

| Mean   | SD       | Min   | Max       | Obs |
|--------|----------|-------|-----------|-----|
| 422.72 | 1,523.24 | -1.00 | 10,000.00 | 47  |

#### ca017\_4\_max\_5\_: Max Bracket of ca017\_4\_5\_

| Mean   | SD     | Min   | Max      | Obs |
|--------|--------|-------|----------|-----|
| 149.25 | 338.98 | -1.00 | 1,000.00 | 16  |

#### ca017\_4\_max\_6\_: Max Bracket of ca017\_4\_6\_

| Mean   | SD       | Min   | Max      | Obs |
|--------|----------|-------|----------|-----|
| 849.42 | 1,327.40 | -1.00 | 3,000.00 | 12  |

#### ca017\_4\_max\_7\_: Max Bracket of ca017\_4\_7\_

| Mean     | SD       | Min   | Max      | Obs |
|----------|----------|-------|----------|-----|
| 1,499.50 | 1,732.63 | -1.00 | 3,000.00 | 4   |

#### ca017\_4\_max\_8\_: Max Bracket of ca017\_4\_8\_

| Mean     | SD | Min      | Max      | Obs |
|----------|----|----------|----------|-----|
| 3,000.00 | .  | 3,000.00 | 3,000.00 | 1   |

#### ca017\_4\_max\_9\_: Max Bracket of ca017\_4\_9\_

| Mean   | SD     | Min   | Max      | Obs |
|--------|--------|-------|----------|-----|
| 499.50 | 707.81 | -1.00 | 1,000.00 | 2   |

#### ca018\_1\_1\_: Total Money Provided to XChildPanAliveName[1]

| Mean     | SD        | Min  | Max          | Obs   |
|----------|-----------|------|--------------|-------|
| 4,227.60 | 35,136.53 | 0.00 | 2,000,000.00 | 8,217 |

#### ca018\_1\_2\_: Total Money Provided to XChildPanAliveName[2]

| Mean     | SD        | Min  | Max          | Obs   |
|----------|-----------|------|--------------|-------|
| 1,691.89 | 14,171.53 | 0.00 | 1,000,000.00 | 7,652 |

#### ca018\_1\_3\_: Total Money Provided to XChildPanAliveName[3]

| Mean   | SD        | Min  | Max        | Obs   |
|--------|-----------|------|------------|-------|
| 978.89 | 13,803.91 | 0.00 | 801,000.00 | 4,418 |

#### ca018\_1\_4\_: Total Money Provided to XChildPanAliveName[4]



| Mean   | SD       | Min  | Max        | Obs   |
|--------|----------|------|------------|-------|
| 534.90 | 5,843.57 | 0.00 | 200,000.00 | 2,319 |

**ca018\_1\_5\_:** Total Money Provided to XChildPanAliveName[5]

| Mean   | SD       | Min  | Max       | Obs   |
|--------|----------|------|-----------|-------|
| 259.60 | 1,978.63 | 0.00 | 40,000.00 | 1,110 |

**ca018\_1\_6\_:** Total Money Provided to XChildPanAliveName[6]

| Mean   | SD       | Min  | Max       | Obs |
|--------|----------|------|-----------|-----|
| 273.17 | 2,673.98 | 0.00 | 50,000.00 | 472 |

**ca018\_1\_7\_:** Total Money Provided to XChildPanAliveName[7]

| Mean   | SD       | Min  | Max       | Obs |
|--------|----------|------|-----------|-----|
| 508.28 | 4,666.25 | 0.00 | 65,000.00 | 211 |

**ca018\_1\_8\_:** Total Money Provided to XChildPanAliveName[8]

| Mean   | SD       | Min  | Max       | Obs |
|--------|----------|------|-----------|-----|
| 152.86 | 1,095.66 | 0.00 | 10,000.00 | 84  |

**ca018\_1\_9\_:** Total Money Provided to XChildPanAliveName[9]

| Mean  | SD    | Min  | Max    | Obs |
|-------|-------|------|--------|-----|
| 15.15 | 61.85 | 0.00 | 300.00 | 33  |

**ca018\_1\_10\_:** Total Money Provided to XChildPanAliveName[10]

| Mean  | SD     | Min  | Max    | Obs |
|-------|--------|------|--------|-----|
| 38.89 | 114.48 | 0.00 | 400.00 | 18  |

**ca018\_1\_11\_:** Total Money Provided to XChildPanAliveName[11]

| Mean   | SD     | Min  | Max    | Obs |
|--------|--------|------|--------|-----|
| 100.00 | 173.21 | 0.00 | 400.00 | 7   |

**ca018\_1\_12\_:** Total Money Provided to XChildPanAliveName[12]

| Mean   | SD     | Min  | Max      | Obs |
|--------|--------|------|----------|-----|
| 533.33 | 611.01 | 0.00 | 1,200.00 | 3   |

**ca018\_1\_13\_:** Total Money Provided to XChildPanAliveName[13]

---

No Observations

---

ca018\_1\_14\_: Total Money Provided to XChildPanAliveName[14]

---

No Observations

---

ca018\_1\_15\_: Total Money Provided to XChildPanAliveName[15]

---

No Observations

---

ca018\_1\_16\_: Total Money Provided to XChildPanAliveName[16]

---

No Observations

---

ca018\_1\_17\_: Total Money Provided to XChildPanAliveName[17]

| Mean | SD | Min  | Max  | Obs |
|------|----|------|------|-----|
| 0.00 | .  | 0.00 | 0.00 | 1   |

ca018\_1\_min\_1\_: Min Bracket of ca018\_1\_1\_

| Mean     | SD       | Min   | Max       | Obs |
|----------|----------|-------|-----------|-----|
| 2,610.21 | 5,840.07 | -1.00 | 20,000.00 | 94  |

ca018\_1\_min\_2\_: Min Bracket of ca018\_1\_2\_

| Mean     | SD       | Min   | Max       | Obs |
|----------|----------|-------|-----------|-----|
| 2,350.70 | 5,261.87 | -1.00 | 20,000.00 | 82  |

ca018\_1\_min\_3\_: Min Bracket of ca018\_1\_3\_

| Mean     | SD       | Min   | Max       | Obs |
|----------|----------|-------|-----------|-----|
| 2,503.27 | 5,455.58 | -1.00 | 20,000.00 | 26  |

ca018\_1\_min\_4\_: Min Bracket of ca018\_1\_4\_

| Mean     | SD       | Min   | Max       | Obs |
|----------|----------|-------|-----------|-----|
| 1,115.92 | 4,156.68 | -1.00 | 20,000.00 | 24  |

ca018\_1\_min\_5\_: Min Bracket of ca018\_1\_5\_

| Mean   | SD       | Min   | Max      | Obs |
|--------|----------|-------|----------|-----|
| 832.50 | 2,041.65 | -1.00 | 5,000.00 | 6   |

ca018\_1\_min\_6\_: Min Bracket of ca018\_1\_6\_

| Mean  | SD   | Min   | Max   | Obs |
|-------|------|-------|-------|-----|
| -1.00 | 0.00 | -1.00 | -1.00 | 3   |

**ca018\_1\_min\_7\_:** Min Bracket of ca018\_1\_7\_

| Mean  | SD   | Min   | Max   | Obs |
|-------|------|-------|-------|-----|
| -1.00 | 0.00 | -1.00 | -1.00 | 3   |

**ca018\_1\_min\_8\_:** Min Bracket of ca018\_1\_8\_

| Mean  | SD    | Min   | Max    | Obs |
|-------|-------|-------|--------|-----|
| 32.67 | 58.31 | -1.00 | 100.00 | 3   |

**ca018\_1\_min\_9\_:** Min Bracket of ca018\_1\_9\_

| Mean  | SD | Min   | Max   | Obs |
|-------|----|-------|-------|-----|
| -1.00 | .  | -1.00 | -1.00 | 1   |

**ca018\_1\_min\_10\_:** Min Bracket of ca018\_1\_10\_

|                 |  |  |  |  |
|-----------------|--|--|--|--|
| No Observations |  |  |  |  |
|-----------------|--|--|--|--|

**ca018\_1\_min\_11\_:** Min Bracket of ca018\_1\_11\_

| Mean   | SD | Min    | Max    | Obs |
|--------|----|--------|--------|-----|
| 100.00 | .  | 100.00 | 100.00 | 1   |

**ca018\_1\_max\_1\_:** Max Bracket of ca018\_1\_1\_

| Mean     | SD       | Min   | Max       | Obs |
|----------|----------|-------|-----------|-----|
| 2,945.52 | 6,016.17 | -1.00 | 20,000.00 | 87  |

**ca018\_1\_max\_2\_:** Max Bracket of ca018\_1\_2\_

| Mean     | SD       | Min   | Max       | Obs |
|----------|----------|-------|-----------|-----|
| 2,357.84 | 5,403.07 | -1.00 | 20,000.00 | 77  |

**ca018\_1\_max\_3\_:** Max Bracket of ca018\_1\_3\_

| Mean     | SD       | Min   | Max       | Obs |
|----------|----------|-------|-----------|-----|
| 2,914.22 | 6,356.30 | -1.00 | 20,000.00 | 27  |

**ca018\_1\_max\_4\_:** Max Bracket of ca018\_1\_4\_

| Mean | SD | Min | Max | Obs |
|------|----|-----|-----|-----|
|------|----|-----|-----|-----|

|        |          |       |           |    |
|--------|----------|-------|-----------|----|
| 999.22 | 4,156.24 | -1.00 | 20,000.00 | 23 |
|--------|----------|-------|-----------|----|

**ca018\_1\_max\_5\_:** Max Bracket of ca018\_1\_5\_

| Mean   | SD       | Min   | Max      | Obs |
|--------|----------|-------|----------|-----|
| 832.50 | 2,041.65 | -1.00 | 5,000.00 | 6   |

**ca018\_1\_max\_6\_:** Max Bracket of ca018\_1\_6\_

| Mean  | SD   | Min   | Max   | Obs |
|-------|------|-------|-------|-----|
| -1.00 | 0.00 | -1.00 | -1.00 | 3   |

**ca018\_1\_max\_7\_:** Max Bracket of ca018\_1\_7\_

| Mean  | SD   | Min   | Max   | Obs |
|-------|------|-------|-------|-----|
| -1.00 | 0.00 | -1.00 | -1.00 | 3   |

**ca018\_1\_max\_8\_:** Max Bracket of ca018\_1\_8\_

| Mean   | SD     | Min   | Max    | Obs |
|--------|--------|-------|--------|-----|
| 166.00 | 289.25 | -1.00 | 500.00 | 3   |

**ca018\_1\_max\_9\_:** Max Bracket of ca018\_1\_9\_

| Mean  | SD | Min   | Max   | Obs |
|-------|----|-------|-------|-----|
| -1.00 | .  | -1.00 | -1.00 | 1   |

**ca018\_1\_max\_10\_:** Max Bracket of ca018\_1\_10\_

|                 |  |  |  |  |
|-----------------|--|--|--|--|
| No Observations |  |  |  |  |
|-----------------|--|--|--|--|

**ca018\_1\_max\_11\_:** Max Bracket of ca018\_1\_11\_

| Mean   | SD | Min    | Max    | Obs |
|--------|----|--------|--------|-----|
| 500.00 | .  | 500.00 | 500.00 | 1   |

**ca018\_2\_1\_:** Regular Payment Provided to XChildPanAliveName[1]

| Mean   | SD       | Min  | Max        | Obs   |
|--------|----------|------|------------|-------|
| 853.07 | 8,521.73 | 0.00 | 500,000.00 | 8,274 |

**ca018\_2\_2\_:** Regular Payment Provided to XChildPanAliveName[2]

| Mean   | SD       | Min  | Max        | Obs   |
|--------|----------|------|------------|-------|
| 471.15 | 2,935.21 | 0.00 | 126,000.00 | 7,701 |

**ca018\_2\_3\_:** Regular Payment Provided to XChildPanAliveName[3]

| Mean   | SD       | Min  | Max        | Obs   |
|--------|----------|------|------------|-------|
| 275.68 | 4,186.13 | 0.00 | 260,000.00 | 4,432 |

**ca018\_2\_4\_:** Regular Payment Provided to XChildPanAliveName[4]

| Mean  | SD     | Min  | Max       | Obs   |
|-------|--------|------|-----------|-------|
| 97.72 | 906.52 | 0.00 | 30,000.00 | 2,328 |

**ca018\_2\_5\_:** Regular Payment Provided to XChildPanAliveName[5]

| Mean  | SD     | Min  | Max       | Obs   |
|-------|--------|------|-----------|-------|
| 76.64 | 616.01 | 0.00 | 10,000.00 | 1,111 |

**ca018\_2\_6\_:** Regular Payment Provided to XChildPanAliveName[6]

| Mean  | SD     | Min  | Max      | Obs |
|-------|--------|------|----------|-----|
| 38.81 | 230.10 | 0.00 | 4,000.00 | 472 |

**ca018\_2\_7\_:** Regular Payment Provided to XChildPanAliveName[7]

| Mean  | SD       | Min  | Max       | Obs |
|-------|----------|------|-----------|-----|
| 96.23 | 1,103.80 | 0.00 | 16,000.00 | 212 |

**ca018\_2\_8\_:** Regular Payment Provided to XChildPanAliveName[8]

| Mean  | SD     | Min  | Max      | Obs |
|-------|--------|------|----------|-----|
| 29.07 | 130.04 | 0.00 | 1,000.00 | 86  |

**ca018\_2\_9\_:** Regular Payment Provided to XChildPanAliveName[9]

| Mean  | SD    | Min  | Max    | Obs |
|-------|-------|------|--------|-----|
| 14.71 | 60.96 | 0.00 | 300.00 | 34  |

**ca018\_2\_10\_:** Regular Payment Provided to XChildPanAliveName[10]

| Mean  | SD     | Min  | Max    | Obs |
|-------|--------|------|--------|-----|
| 38.89 | 114.48 | 0.00 | 400.00 | 18  |

**ca018\_2\_11\_:** Regular Payment Provided to XChildPanAliveName[11]

| Mean  | SD     | Min  | Max    | Obs |
|-------|--------|------|--------|-----|
| 87.50 | 164.21 | 0.00 | 400.00 | 8   |

**ca018\_2\_12\_:** Regular Payment Provided to XChildPanAliveName[12]

| Mean   | SD     | Min  | Max    | Obs |
|--------|--------|------|--------|-----|
| 133.33 | 230.94 | 0.00 | 400.00 | 3   |

ca018\_2\_13\_: Regular Payment Provided to XChildPanAliveName[13]

|                 |
|-----------------|
| No Observations |
|-----------------|

ca018\_2\_14\_: Regular Payment Provided to XChildPanAliveName[14]

|                 |
|-----------------|
| No Observations |
|-----------------|

ca018\_2\_15\_: Regular Payment Provided to XChildPanAliveName[15]

|                 |
|-----------------|
| No Observations |
|-----------------|

ca018\_2\_16\_: Regular Payment Provided to XChildPanAliveName[16]

|                 |
|-----------------|
| No Observations |
|-----------------|

ca018\_2\_17\_: Regular Payment Provided to XChildPanAliveName[17]

| Mean | SD | Min  | Max  | Obs |
|------|----|------|------|-----|
| 0.00 | .  | 0.00 | 0.00 | 1   |

ca018\_2\_min\_1\_: Min Bracket of ca018\_2\_1\_

| Mean   | SD       | Min   | Max       | Obs |
|--------|----------|-------|-----------|-----|
| 315.78 | 1,668.96 | -1.00 | 10,000.00 | 36  |

ca018\_2\_min\_2\_: Min Bracket of ca018\_2\_2\_

| Mean   | SD       | Min   | Max       | Obs |
|--------|----------|-------|-----------|-----|
| 308.15 | 1,740.21 | -1.00 | 10,000.00 | 33  |

ca018\_2\_min\_3\_: Min Bracket of ca018\_2\_3\_

| Mean  | SD    | Min   | Max    | Obs |
|-------|-------|-------|--------|-----|
| 14.46 | 55.75 | -1.00 | 200.00 | 13  |

ca018\_2\_min\_4\_: Min Bracket of ca018\_2\_4\_

| Mean  | SD   | Min   | Max   | Obs |
|-------|------|-------|-------|-----|
| -1.00 | 0.00 | -1.00 | -1.00 | 15  |

ca018\_2\_min\_5\_: Min Bracket of ca018\_2\_5\_

| Mean  | SD   | Min   | Max   | Obs |
|-------|------|-------|-------|-----|
| -1.00 | 0.00 | -1.00 | -1.00 | 5   |

ca018\_2\_min\_6\_: Min Bracket of ca018\_2\_6\_

| Mean  | SD   | Min   | Max   | Obs |
|-------|------|-------|-------|-----|
| -1.00 | 0.00 | -1.00 | -1.00 | 3   |

ca018\_2\_min\_7\_: Min Bracket of ca018\_2\_7\_

| Mean  | SD   | Min   | Max   | Obs |
|-------|------|-------|-------|-----|
| -1.00 | 0.00 | -1.00 | -1.00 | 2   |

ca018\_2\_min\_8\_: Min Bracket of ca018\_2\_8\_

| Mean  | SD | Min   | Max   | Obs |
|-------|----|-------|-------|-----|
| -1.00 | .  | -1.00 | -1.00 | 1   |

ca018\_2\_max\_1\_: Max Bracket of ca018\_2\_1\_

| Mean   | SD       | Min   | Max       | Obs |
|--------|----------|-------|-----------|-----|
| 412.68 | 1,705.78 | -1.00 | 10,000.00 | 37  |

ca018\_2\_max\_2\_: Max Bracket of ca018\_2\_2\_

| Mean  | SD     | Min   | Max      | Obs |
|-------|--------|-------|----------|-----|
| 30.28 | 176.95 | -1.00 | 1,000.00 | 32  |

ca018\_2\_max\_3\_: Max Bracket of ca018\_2\_3\_

| Mean  | SD     | Min   | Max      | Obs |
|-------|--------|-------|----------|-----|
| 77.71 | 266.81 | -1.00 | 1,000.00 | 14  |

ca018\_2\_max\_4\_: Max Bracket of ca018\_2\_4\_

| Mean  | SD   | Min   | Max   | Obs |
|-------|------|-------|-------|-----|
| -1.00 | 0.00 | -1.00 | -1.00 | 15  |

ca018\_2\_max\_5\_: Max Bracket of ca018\_2\_5\_

| Mean  | SD   | Min   | Max   | Obs |
|-------|------|-------|-------|-----|
| -1.00 | 0.00 | -1.00 | -1.00 | 5   |

ca018\_2\_max\_6\_: Max Bracket of ca018\_2\_6\_

| Mean  | SD   | Min   | Max   | Obs |
|-------|------|-------|-------|-----|
| -1.00 | 0.00 | -1.00 | -1.00 | 3   |

**ca018\_2\_max\_7\_:** Max Bracket of ca018\_2\_7\_

| Mean  | SD   | Min   | Max   | Obs |
|-------|------|-------|-------|-----|
| -1.00 | 0.00 | -1.00 | -1.00 | 2   |

**ca018\_2\_max\_8\_:** Max Bracket of ca018\_2\_8\_

| Mean  | SD | Min   | Max   | Obs |
|-------|----|-------|-------|-----|
| -1.00 | .  | -1.00 | -1.00 | 1   |

**ca018\_3\_1\_:** Total In-kind Payment Provided to XChildPanAliveName[1]

| Mean   | SD       | Min  | Max        | Obs   |
|--------|----------|------|------------|-------|
| 485.64 | 2,755.29 | 0.00 | 120,000.00 | 8,106 |

**ca018\_3\_2\_:** Total In-kind Payment Provided to XChildPanAliveName[2]

| Mean   | SD       | Min  | Max       | Obs   |
|--------|----------|------|-----------|-------|
| 241.09 | 1,510.65 | 0.00 | 60,000.00 | 7,585 |

**ca018\_3\_3\_:** Total In-kind Payment Provided to XChildPanAliveName[3]

| Mean   | SD     | Min  | Max       | Obs   |
|--------|--------|------|-----------|-------|
| 114.77 | 677.74 | 0.00 | 20,000.00 | 4,399 |

**ca018\_3\_4\_:** Total In-kind Payment Provided to XChildPanAliveName[4]

| Mean  | SD     | Min  | Max       | Obs   |
|-------|--------|------|-----------|-------|
| 67.70 | 448.78 | 0.00 | 15,000.00 | 2,315 |

**ca018\_3\_5\_:** Total In-kind Payment Provided to XChildPanAliveName[5]

| Mean  | SD     | Min  | Max      | Obs   |
|-------|--------|------|----------|-------|
| 36.93 | 194.16 | 0.00 | 3,650.00 | 1,105 |

**ca018\_3\_6\_:** Total In-kind Payment Provided to XChildPanAliveName[6]

| Mean  | SD     | Min  | Max      | Obs |
|-------|--------|------|----------|-----|
| 36.04 | 220.77 | 0.00 | 3,000.00 | 469 |

**ca018\_3\_7\_:** Total In-kind Payment Provided to XChildPanAliveName[7]



| Mean  | SD     | Min  | Max      | Obs |
|-------|--------|------|----------|-----|
| 20.17 | 105.85 | 0.00 | 1,200.00 | 211 |

**ca018\_3\_8\_:** Total In-kind Payment Provided to XChildPanAliveName[8]

| Mean  | SD    | Min  | Max    | Obs |
|-------|-------|------|--------|-----|
| 11.26 | 44.72 | 0.00 | 260.00 | 87  |

**ca018\_3\_9\_:** Total In-kind Payment Provided to XChildPanAliveName[9]

| Mean | SD    | Min  | Max    | Obs |
|------|-------|------|--------|-----|
| 6.06 | 34.82 | 0.00 | 200.00 | 33  |

**ca018\_3\_10\_:** Total In-kind Payment Provided to XChildPanAliveName[10]

| Mean  | SD     | Min  | Max    | Obs |
|-------|--------|------|--------|-----|
| 41.67 | 143.74 | 0.00 | 600.00 | 18  |

**ca018\_3\_11\_:** Total In-kind Payment Provided to XChildPanAliveName[11]

| Mean | SD   | Min  | Max  | Obs |
|------|------|------|------|-----|
| 0.00 | 0.00 | 0.00 | 0.00 | 8   |

**ca018\_3\_12\_:** Total In-kind Payment Provided to XChildPanAliveName[12]

| Mean | SD   | Min  | Max  | Obs |
|------|------|------|------|-----|
| 0.00 | 0.00 | 0.00 | 0.00 | 3   |

**ca018\_3\_13\_:** Total In-kind Payment Provided to XChildPanAliveName[13]

|                 |  |  |  |  |
|-----------------|--|--|--|--|
| No Observations |  |  |  |  |
|-----------------|--|--|--|--|

**ca018\_3\_14\_:** Total In-kind Payment Provided to XChildPanAliveName[14]

|                 |  |  |  |  |
|-----------------|--|--|--|--|
| No Observations |  |  |  |  |
|-----------------|--|--|--|--|

**ca018\_3\_15\_:** Total In-kind Payment Provided to XChildPanAliveName[15]

|                 |  |  |  |  |
|-----------------|--|--|--|--|
| No Observations |  |  |  |  |
|-----------------|--|--|--|--|

**ca018\_3\_16\_:** Total In-kind Payment Provided to XChildPanAliveName[16]

|                 |  |  |  |  |
|-----------------|--|--|--|--|
| No Observations |  |  |  |  |
|-----------------|--|--|--|--|

**ca018\_3\_17\_:** Total In-kind Payment Provided to XChildPanAliveName[17]

| Mean | SD | Min  | Max  | Obs |
|------|----|------|------|-----|
| 0.00 | .  | 0.00 | 0.00 | 1   |

#### ca018\_3\_min\_1\_: Min Bracket of ca018\_3\_1\_

| Mean     | SD       | Min   | Max       | Obs |
|----------|----------|-------|-----------|-----|
| 1,029.76 | 2,383.98 | -1.00 | 20,000.00 | 196 |

#### ca018\_3\_min\_2\_: Min Bracket of ca018\_3\_2\_

| Mean   | SD       | Min   | Max       | Obs |
|--------|----------|-------|-----------|-----|
| 862.70 | 2,616.06 | -1.00 | 20,000.00 | 141 |

#### ca018\_3\_min\_3\_: Min Bracket of ca018\_3\_3\_

| Mean   | SD     | Min   | Max      | Obs |
|--------|--------|-------|----------|-----|
| 415.45 | 852.30 | -1.00 | 5,000.00 | 44  |

#### ca018\_3\_min\_4\_: Min Bracket of ca018\_3\_4\_

| Mean   | SD       | Min   | Max       | Obs |
|--------|----------|-------|-----------|-----|
| 832.70 | 3,834.70 | -1.00 | 20,000.00 | 27  |

#### ca018\_3\_min\_5\_: Min Bracket of ca018\_3\_5\_

| Mean   | SD       | Min   | Max      | Obs |
|--------|----------|-------|----------|-----|
| 926.64 | 2,014.32 | -1.00 | 5,000.00 | 11  |

#### ca018\_3\_min\_6\_: Min Bracket of ca018\_3\_6\_

| Mean  | SD    | Min   | Max    | Obs |
|-------|-------|-------|--------|-----|
| 19.20 | 45.17 | -1.00 | 100.00 | 5   |

#### ca018\_3\_min\_7\_: Min Bracket of ca018\_3\_7\_

| Mean     | SD       | Min   | Max      | Obs |
|----------|----------|-------|----------|-----|
| 1,666.00 | 2,887.33 | -1.00 | 5,000.00 | 3   |

#### ca018\_3\_min\_8\_: Min Bracket of ca018\_3\_8\_

|                 |  |  |  |  |
|-----------------|--|--|--|--|
| No Observations |  |  |  |  |
|-----------------|--|--|--|--|

#### ca018\_3\_min\_9\_: Min Bracket of ca018\_3\_9\_

| Mean | SD | Min | Max | Obs |
|------|----|-----|-----|-----|
|------|----|-----|-----|-----|

|       |   |       |       |   |
|-------|---|-------|-------|---|
| -1.00 | . | -1.00 | -1.00 | 1 |
|-------|---|-------|-------|---|

**ca018\_3\_max\_1\_ : Max Bracket of ca018\_3\_1\_**

| Mean     | SD       | Min   | Max       | Obs |
|----------|----------|-------|-----------|-----|
| 1,910.40 | 4,033.13 | -1.00 | 20,000.00 | 205 |

**ca018\_3\_max\_2\_ : Max Bracket of ca018\_3\_2\_**

| Mean     | SD       | Min   | Max       | Obs |
|----------|----------|-------|-----------|-----|
| 1,648.96 | 4,318.36 | -1.00 | 20,000.00 | 148 |

**ca018\_3\_max\_3\_ : Max Bracket of ca018\_3\_3\_**

| Mean   | SD       | Min   | Max      | Obs |
|--------|----------|-------|----------|-----|
| 801.72 | 1,524.16 | -1.00 | 5,000.00 | 47  |

**ca018\_3\_max\_4\_ : Max Bracket of ca018\_3\_4\_**

| Mean   | SD     | Min   | Max      | Obs |
|--------|--------|-------|----------|-----|
| 229.00 | 420.81 | -1.00 | 1,500.00 | 27  |

**ca018\_3\_max\_5\_ : Max Bracket of ca018\_3\_5\_**

| Mean     | SD       | Min   | Max      | Obs |
|----------|----------|-------|----------|-----|
| 1,008.55 | 1,982.96 | -1.00 | 5,000.00 | 11  |

**ca018\_3\_max\_6\_ : Max Bracket of ca018\_3\_6\_**

| Mean  | SD    | Min   | Max    | Obs |
|-------|-------|-------|--------|-----|
| 15.83 | 41.23 | -1.00 | 100.00 | 6   |

**ca018\_3\_max\_7\_ : Max Bracket of ca018\_3\_7\_**

| Mean     | SD       | Min   | Max      | Obs |
|----------|----------|-------|----------|-----|
| 1,666.00 | 2,887.33 | -1.00 | 5,000.00 | 3   |

**ca018\_3\_max\_8\_ : Max Bracket of ca018\_3\_8\_**

|                 |  |  |  |  |
|-----------------|--|--|--|--|
| No Observations |  |  |  |  |
|-----------------|--|--|--|--|

**ca018\_3\_max\_9\_ : Max Bracket of ca018\_3\_9\_**

| Mean  | SD | Min   | Max   | Obs |
|-------|----|-------|-------|-----|
| -1.00 | .  | -1.00 | -1.00 | 1   |

**ca018\_4\_1\_:** Regular In-kind Payment Provided to XChildPanAliveName[1]

| Mean  | SD       | Min  | Max       | Obs   |
|-------|----------|------|-----------|-------|
| 84.86 | 1,230.64 | 0.00 | 60,000.00 | 8,259 |

**ca018\_4\_2\_:** Regular In-kind Payment Provided to XChildPanAliveName[2]

| Mean  | SD     | Min  | Max       | Obs   |
|-------|--------|------|-----------|-------|
| 31.32 | 477.96 | 0.00 | 24,000.00 | 7,691 |

**ca018\_4\_3\_:** Regular In-kind Payment Provided to XChildPanAliveName[3]

| Mean  | SD     | Min  | Max       | Obs   |
|-------|--------|------|-----------|-------|
| 22.46 | 351.52 | 0.00 | 18,000.00 | 4,433 |

**ca018\_4\_4\_:** Regular In-kind Payment Provided to XChildPanAliveName[4]

| Mean  | SD     | Min  | Max      | Obs   |
|-------|--------|------|----------|-------|
| 12.47 | 160.80 | 0.00 | 5,000.00 | 2,328 |

**ca018\_4\_5\_:** Regular In-kind Payment Provided to XChildPanAliveName[5]

| Mean | SD    | Min  | Max      | Obs   |
|------|-------|------|----------|-------|
| 2.37 | 35.47 | 0.00 | 1,000.00 | 1,110 |

**ca018\_4\_6\_:** Regular In-kind Payment Provided to XChildPanAliveName[6]

| Mean | SD    | Min  | Max    | Obs |
|------|-------|------|--------|-----|
| 3.68 | 33.99 | 0.00 | 600.00 | 472 |

**ca018\_4\_7\_:** Regular In-kind Payment Provided to XChildPanAliveName[7]

| Mean | SD   | Min  | Max   | Obs |
|------|------|------|-------|-----|
| 0.65 | 6.49 | 0.00 | 80.00 | 212 |

**ca018\_4\_8\_:** Regular In-kind Payment Provided to XChildPanAliveName[8]

| Mean | SD    | Min  | Max    | Obs |
|------|-------|------|--------|-----|
| 2.30 | 21.44 | 0.00 | 200.00 | 87  |

**ca018\_4\_9\_:** Regular In-kind Payment Provided to XChildPanAliveName[9]

| Mean | SD   | Min  | Max  | Obs |
|------|------|------|------|-----|
| 0.00 | 0.00 | 0.00 | 0.00 | 34  |

**ca018\_4\_10\_:** Regular In-kind Payment Provided to XChildPanAliveName[10]

| Mean | SD   | Min  | Max  | Obs |
|------|------|------|------|-----|
| 0.00 | 0.00 | 0.00 | 0.00 | 18  |

**ca018\_4\_11\_:** Regular In-kind Payment Provided to XChildPanAliveName[11]

| Mean | SD   | Min  | Max  | Obs |
|------|------|------|------|-----|
| 0.00 | 0.00 | 0.00 | 0.00 | 8   |

**ca018\_4\_12\_:** Regular In-kind Payment Provided to XChildPanAliveName[12]

| Mean | SD   | Min  | Max  | Obs |
|------|------|------|------|-----|
| 0.00 | 0.00 | 0.00 | 0.00 | 3   |

**ca018\_4\_13\_:** Regular In-kind Payment Provided to XChildPanAliveName[13]

|                 |  |  |  |  |
|-----------------|--|--|--|--|
| No Observations |  |  |  |  |
|-----------------|--|--|--|--|

**ca018\_4\_14\_:** Regular In-kind Payment Provided to XChildPanAliveName[14]

|                 |  |  |  |  |
|-----------------|--|--|--|--|
| No Observations |  |  |  |  |
|-----------------|--|--|--|--|

**ca018\_4\_15\_:** Regular In-kind Payment Provided to XChildPanAliveName[15]

|                 |  |  |  |  |
|-----------------|--|--|--|--|
| No Observations |  |  |  |  |
|-----------------|--|--|--|--|

**ca018\_4\_16\_:** Regular In-kind Payment Provided to XChildPanAliveName[16]

|                 |  |  |  |  |
|-----------------|--|--|--|--|
| No Observations |  |  |  |  |
|-----------------|--|--|--|--|

**ca018\_4\_17\_:** Regular In-kind Payment Provided to XChildPanAliveName[17]

| Mean | SD | Min  | Max  | Obs |
|------|----|------|------|-----|
| 0.00 | .  | 0.00 | 0.00 | 1   |

**ca018\_4\_min\_1\_:** Min Bracket of ca018\_4\_1\_

| Mean   | SD     | Min   | Max      | Obs |
|--------|--------|-------|----------|-----|
| 137.22 | 477.85 | -1.00 | 3,000.00 | 50  |

**ca018\_4\_min\_2\_:** Min Bracket of ca018\_4\_2\_

| Mean   | SD     | Min   | Max      | Obs |
|--------|--------|-------|----------|-----|
| 224.13 | 697.81 | -1.00 | 3,000.00 | 40  |

**ca018\_4\_min\_3\_:** Min Bracket of ca018\_4\_3\_

| Mean   | SD     | Min   | Max      | Obs |
|--------|--------|-------|----------|-----|
| 245.31 | 829.54 | -1.00 | 3,000.00 | 13  |

#### ca018\_4\_min\_4\_: Min Bracket of ca018\_4\_4\_

| Mean  | SD    | Min   | Max    | Obs |
|-------|-------|-------|--------|-----|
| 12.40 | 51.90 | -1.00 | 200.00 | 15  |

#### ca018\_4\_min\_5\_: Min Bracket of ca018\_4\_5\_

| Mean  | SD   | Min   | Max   | Obs |
|-------|------|-------|-------|-----|
| -1.00 | 0.00 | -1.00 | -1.00 | 6   |

#### ca018\_4\_min\_6\_: Min Bracket of ca018\_4\_6\_

| Mean  | SD   | Min   | Max   | Obs |
|-------|------|-------|-------|-----|
| -1.00 | 0.00 | -1.00 | -1.00 | 3   |

#### ca018\_4\_min\_7\_: Min Bracket of ca018\_4\_7\_

| Mean  | SD   | Min   | Max   | Obs |
|-------|------|-------|-------|-----|
| -1.00 | 0.00 | -1.00 | -1.00 | 2   |

#### ca018\_4\_max\_1\_: Max Bracket of ca018\_4\_1\_

| Mean   | SD       | Min   | Max       | Obs |
|--------|----------|-------|-----------|-----|
| 549.23 | 2,001.83 | -1.00 | 10,000.00 | 52  |

#### ca018\_4\_max\_2\_: Max Bracket of ca018\_4\_2\_

| Mean   | SD       | Min   | Max       | Obs |
|--------|----------|-------|-----------|-----|
| 378.21 | 1,632.11 | -1.00 | 10,000.00 | 43  |

#### ca018\_4\_max\_3\_: Max Bracket of ca018\_4\_3\_

| Mean   | SD     | Min   | Max      | Obs |
|--------|--------|-------|----------|-----|
| 306.85 | 855.18 | -1.00 | 3,000.00 | 13  |

#### ca018\_4\_max\_4\_: Max Bracket of ca018\_4\_4\_

| Mean  | SD     | Min   | Max      | Obs |
|-------|--------|-------|----------|-----|
| 65.73 | 258.46 | -1.00 | 1,000.00 | 15  |

#### ca018\_4\_max\_5\_: Max Bracket of ca018\_4\_5\_

| Mean  | SD   | Min   | Max   | Obs |
|-------|------|-------|-------|-----|
| -1.00 | 0.00 | -1.00 | -1.00 | 6   |

**ca018\_4\_max\_6\_:** Max Bracket of ca018\_4\_6\_

| Mean  | SD   | Min   | Max   | Obs |
|-------|------|-------|-------|-----|
| -1.00 | 0.00 | -1.00 | -1.00 | 3   |

**ca018\_4\_max\_7\_:** Max Bracket of ca018\_4\_7\_

| Mean  | SD   | Min   | Max   | Obs |
|-------|------|-------|-------|-----|
| -1.00 | 0.00 | -1.00 | -1.00 | 2   |

**ca019\_1\_:** Relationship With XChildPanAliveName[1] Affected By the COVID-19 Pandemic?

|                | Freq.  | %      |
|----------------|--------|--------|
| 1 Got Better   | 497    | 4.63   |
| 2 Got Worse    | 365    | 3.40   |
| 3 No Influence | 9,870  | 91.97  |
| Total          | 10,732 | 100.00 |

**ca019\_2\_:** Relationship With XChildPanAliveName[2] Affected By the COVID-19 Pandemic?

|                | Freq. | %      |
|----------------|-------|--------|
| 1 Got Better   | 383   | 4.34   |
| 2 Got Worse    | 364   | 4.12   |
| 3 No Influence | 8,088 | 91.54  |
| Total          | 8,835 | 100.00 |

**ca019\_3\_:** Relationship With XChildPanAliveName[3] Affected By the COVID-19 Pandemic?

|                | Freq. | %      |
|----------------|-------|--------|
| 1 Got Better   | 180   | 3.72   |
| 2 Got Worse    | 211   | 4.36   |
| 3 No Influence | 4,451 | 91.92  |
| Total          | 4,842 | 100.00 |

**ca019\_4\_:** Relationship With XChildPanAliveName[4] Affected By the COVID-19 Pandemic?

|                | Freq. | %      |
|----------------|-------|--------|
| 1 Got Better   | 95    | 3.79   |
| 2 Got Worse    | 91    | 3.63   |
| 3 No Influence | 2,321 | 92.58  |
| Total          | 2,507 | 100.00 |

**ca019\_5\_:** Relationship With XChildPanAliveName[5] Affected By the COVID-19 Pandemic?

|                | Freq. | %      |
|----------------|-------|--------|
| 1 Got Better   | 46    | 3.96   |
| 2 Got Worse    | 44    | 3.78   |
| 3 No Influence | 1,073 | 92.26  |
| Total          | 1,163 | 100.00 |

**ca019\_6\_:** Relationship With XChildPanAliveName[6] Affected By the COVID-19 Pandemic?

|                | Freq. | %      |
|----------------|-------|--------|
| 1 Got Better   | 19    | 3.85   |
| 2 Got Worse    | 18    | 3.65   |
| 3 No Influence | 456   | 92.49  |
| Total          | 493   | 100.00 |

**ca019\_7\_:** Relationship With XChildPanAliveName[7] Affected By the COVID-19 Pandemic?

|                | Freq. | %      |
|----------------|-------|--------|
| 1 Got Better   | 9     | 3.98   |
| 2 Got Worse    | 10    | 4.42   |
| 3 No Influence | 207   | 91.59  |
| Total          | 226   | 100.00 |

**ca019\_8\_:** Relationship With XChildPanAliveName[8] Affected By the COVID-19 Pandemic?

|                | Freq. | %      |
|----------------|-------|--------|
| 1 Got Better   | 3     | 3.30   |
| 2 Got Worse    | 3     | 3.30   |
| 3 No Influence | 85    | 93.41  |
| Total          | 91    | 100.00 |

**ca019\_9\_:** Relationship With XChildPanAliveName[9] Affected By the COVID-19 Pandemic?

|                | Freq. | %      |
|----------------|-------|--------|
| 1 Got Better   | 1     | 2.78   |
| 2 Got Worse    | 5     | 13.89  |
| 3 No Influence | 30    | 83.33  |
| Total          | 36    | 100.00 |

**ca019\_10\_:** Relationship With XChildPanAliveName[10] Affected By the COVID-19 Pandemic?

|                | Freq. | %     |
|----------------|-------|-------|
| 1 Got Better   | 1     | 5.26  |
| 3 No Influence | 18    | 94.74 |



|       |    |        |
|-------|----|--------|
| Total | 19 | 100.00 |
|-------|----|--------|

ca019\_11\_: Relationship With XChildPanAliveName[11] Affected By the COVID-19 Pandemic?

|                | Freq. | %      |
|----------------|-------|--------|
| 3 No Influence | 8     | 100.00 |
| Total          | 8     | 100.00 |

ca019\_12\_: Relationship With XChildPanAliveName[12] Affected By the COVID-19 Pandemic?

|                | Freq. | %      |
|----------------|-------|--------|
| 3 No Influence | 3     | 100.00 |
| Total          | 3     | 100.00 |

ca019\_13\_: Relationship With XChildPanAliveName[13] Affected By the COVID-19 Pandemic?

|                | Freq. | %      |
|----------------|-------|--------|
| 3 No Influence | 1     | 100.00 |
| Total          | 1     | 100.00 |

ca019\_14\_: Relationship With XChildPanAliveName[14] Affected By the COVID-19 Pandemic?

|                 |
|-----------------|
| No Observations |
|-----------------|

ca019\_15\_: Relationship With XChildPanAliveName[15] Affected By the COVID-19 Pandemic?

|                 |
|-----------------|
| No Observations |
|-----------------|

ca019\_16\_: Relationship With XChildPanAliveName[16] Affected By the COVID-19 Pandemic?

|                 |
|-----------------|
| No Observations |
|-----------------|

ca019\_17\_: Relationship With XChildPanAliveName[17] Affected By the COVID-19 Pandemic?

|                | Freq. | %      |
|----------------|-------|--------|
| 3 No Influence | 1     | 100.00 |
| Total          | 1     | 100.00 |

ca020\_1\_: Was XChildCoupleDis[1]'s Income Affected By the COVID-19 Pandemic?

|  | Freq. | % |
|--|-------|---|
|--|-------|---|

|                    |        |        |
|--------------------|--------|--------|
| 1 Income Increased | 61     | 0.57   |
| 2 Income Decreased | 6,097  | 57.16  |
| 3 No Influence     | 3,768  | 35.33  |
| 997 Don't Know     | 738    | 6.92   |
| 999 Refuse         | 2      | 0.02   |
| Total              | 10,666 | 100.00 |

**ca020\_2\_:** Was XChildCoupleDis[2]'s Income Affected By the COVID-19 Pandemic?

|                    | Freq. | %      |
|--------------------|-------|--------|
| 1 Income Increased | 42    | 0.48   |
| 2 Income Decreased | 4,637 | 53.55  |
| 3 No Influence     | 3,220 | 37.18  |
| 997 Don't Know     | 757   | 8.74   |
| 999 Refuse         | 4     | 0.05   |
| Total              | 8,660 | 100.00 |

**ca020\_3\_:** Was XChildCoupleDis[3]'s Income Affected By the COVID-19 Pandemic?

|                    | Freq. | %      |
|--------------------|-------|--------|
| 1 Income Increased | 24    | 0.50   |
| 2 Income Decreased | 2,399 | 50.35  |
| 3 No Influence     | 1,874 | 39.33  |
| 997 Don't Know     | 466   | 9.78   |
| 999 Refuse         | 2     | 0.04   |
| Total              | 4,765 | 100.00 |

**ca020\_4\_:** Was XChildCoupleDis[4]'s Income Affected By the COVID-19 Pandemic?

|                    | Freq. | %      |
|--------------------|-------|--------|
| 1 Income Increased | 8     | 0.32   |
| 2 Income Decreased | 1,147 | 46.34  |
| 3 No Influence     | 1,036 | 41.86  |
| 997 Don't Know     | 283   | 11.43  |
| 999 Refuse         | 1     | 0.04   |
| Total              | 2,475 | 100.00 |

**ca020\_5\_:** Was XChildCoupleDis[5]'s Income Affected By the COVID-19 Pandemic?

|                    | Freq. | %      |
|--------------------|-------|--------|
| 1 Income Increased | 2     | 0.17   |
| 2 Income Decreased | 476   | 41.11  |
| 3 No Influence     | 527   | 45.51  |
| 997 Don't Know     | 153   | 13.21  |
| Total              | 1,158 | 100.00 |

**ca020\_6\_:** Was XChildCoupleDis[6]'s Income Affected By the COVID-19 Pandemic?

|                    | Freq. | %      |
|--------------------|-------|--------|
| 1 Income Increased | 3     | 0.61   |
| 2 Income Decreased | 185   | 37.91  |
| 3 No Influence     | 214   | 43.85  |
| 997 Don't Know     | 86    | 17.62  |
| Total              | 488   | 100.00 |

**ca020\_7\_:** Was XChildCoupleDis[7]'s Income Affected By the COVID-19 Pandemic?

|                    | Freq. | %      |
|--------------------|-------|--------|
| 2 Income Decreased | 74    | 33.64  |
| 3 No Influence     | 107   | 48.64  |
| 997 Don't Know     | 39    | 17.73  |
| Total              | 220   | 100.00 |

**ca020\_8\_:** Was XChildCoupleDis[8]'s Income Affected By the COVID-19 Pandemic?

|                    | Freq. | %      |
|--------------------|-------|--------|
| 1 Income Increased | 1     | 1.14   |
| 2 Income Decreased | 29    | 32.95  |
| 3 No Influence     | 44    | 50.00  |
| 997 Don't Know     | 14    | 15.91  |
| Total              | 88    | 100.00 |

**ca020\_9\_:** Was XChildCoupleDis[9]'s Income Affected By the COVID-19 Pandemic?

|                    | Freq. | %      |
|--------------------|-------|--------|
| 1 Income Increased | 1     | 2.78   |
| 2 Income Decreased | 11    | 30.56  |
| 3 No Influence     | 17    | 47.22  |
| 997 Don't Know     | 7     | 19.44  |
| Total              | 36    | 100.00 |

**ca020\_10\_:** Was XChildCoupleDis[10]'s Income Affected By the COVID-19 Pandemic?

|                    | Freq. | %      |
|--------------------|-------|--------|
| 2 Income Decreased | 6     | 31.58  |
| 3 No Influence     | 10    | 52.63  |
| 997 Don't Know     | 3     | 15.79  |
| Total              | 19    | 100.00 |

**ca020\_11\_:** Was XChildCoupleDis[11]'s Income Affected By the COVID-19 Pandemic?

|                    | Freq. | %     |
|--------------------|-------|-------|
| 2 Income Decreased | 2     | 25.00 |

|                |   |        |
|----------------|---|--------|
| 3 No Influence | 3 | 37.50  |
| 997 Don't Know | 3 | 37.50  |
| Total          | 8 | 100.00 |

**ca020\_12\_:** Was XChildCoupleDis[12]'s Income Affected By the COVID-19 Pandemic?

|                    | Freq. | %      |
|--------------------|-------|--------|
| 2 Income Decreased | 1     | 33.33  |
| 3 No Influence     | 2     | 66.67  |
| Total              | 3     | 100.00 |

**ca020\_13\_:** Was XChildCoupleDis[13]'s Income Affected By the COVID-19 Pandemic?

|                | Freq. | %      |
|----------------|-------|--------|
| 997 Don't Know | 1     | 100.00 |
| Total          | 1     | 100.00 |

**ca020\_14\_:** Was XChildCoupleDis[14]'s Income Affected By the COVID-19 Pandemic?

|                 |
|-----------------|
| No Observations |
|-----------------|

**ca020\_15\_:** Was XChildCoupleDis[15]'s Income Affected By the COVID-19 Pandemic?

|                 |
|-----------------|
| No Observations |
|-----------------|

**ca020\_16\_:** Was XChildCoupleDis[16]'s Income Affected By the COVID-19 Pandemic?

|                 |
|-----------------|
| No Observations |
|-----------------|

**ca020\_17\_:** Was XChildCoupleDis[17]'s Income Affected By the COVID-19 Pandemic?

|                | Freq. | %      |
|----------------|-------|--------|
| 997 Don't Know | 1     | 100.00 |
| Total          | 1     | 100.00 |

**ca020\_1\_1\_:** Percent of Increase in Income

| Mean  | SD    | Min   | Max    | Obs |
|-------|-------|-------|--------|-----|
| 26.72 | 28.82 | -1.00 | 100.00 | 61  |

**ca020\_1\_2\_:** Percent of Increase in Income

| Mean | SD | Min | Max | Obs |
|------|----|-----|-----|-----|
|------|----|-----|-----|-----|

|        |          |       |           |    |
|--------|----------|-------|-----------|----|
| 741.81 | 4,625.07 | -1.00 | 30,000.00 | 42 |
|--------|----------|-------|-----------|----|

**ca020\_1\_3\_** : Percent of Increase in Income

| Mean  | SD    | Min   | Max    | Obs |
|-------|-------|-------|--------|-----|
| 23.88 | 26.40 | -1.00 | 100.00 | 24  |

**ca020\_1\_4\_** : Percent of Increase in Income

| Mean  | SD    | Min   | Max   | Obs |
|-------|-------|-------|-------|-----|
| 13.38 | 15.19 | -1.00 | 40.00 | 8   |

**ca020\_1\_5\_** : Percent of Increase in Income

| Mean | SD   | Min  | Max   | Obs |
|------|------|------|-------|-----|
| 6.50 | 4.95 | 3.00 | 10.00 | 2   |

**ca020\_1\_6\_** : Percent of Increase in Income

| Mean  | SD    | Min   | Max   | Obs |
|-------|-------|-------|-------|-----|
| 26.67 | 20.82 | 10.00 | 50.00 | 3   |

**ca020\_1\_7\_** : Percent of Increase in Income

|                 |  |  |  |  |
|-----------------|--|--|--|--|
| No Observations |  |  |  |  |
|-----------------|--|--|--|--|

**ca020\_1\_8\_** : Percent of Increase in Income

| Mean  | SD | Min   | Max   | Obs |
|-------|----|-------|-------|-----|
| -1.00 | .  | -1.00 | -1.00 | 1   |

**ca020\_1\_9\_** : Percent of Increase in Income

| Mean  | SD | Min   | Max   | Obs |
|-------|----|-------|-------|-----|
| 10.00 | .  | 10.00 | 10.00 | 1   |

**ca020\_2\_1\_** : Percent of Decrease in Income

| Mean  | SD    | Min   | Max    | Obs   |
|-------|-------|-------|--------|-------|
| 38.42 | 29.67 | -1.00 | 100.00 | 6,097 |

**ca020\_2\_2\_** : Percent of Decrease in Income

| Mean  | SD    | Min   | Max    | Obs   |
|-------|-------|-------|--------|-------|
| 37.96 | 29.71 | -1.00 | 100.00 | 4,637 |

**ca020\_2\_3\_**: Percent of Decrease in Income

| Mean  | SD    | Min   | Max    | Obs   |
|-------|-------|-------|--------|-------|
| 37.51 | 29.71 | -1.00 | 100.00 | 2,399 |

**ca020\_2\_4\_**: Percent of Decrease in Income

| Mean  | SD    | Min   | Max    | Obs   |
|-------|-------|-------|--------|-------|
| 37.87 | 30.16 | -1.00 | 100.00 | 1,147 |

**ca020\_2\_5\_**: Percent of Decrease in Income

| Mean  | SD    | Min   | Max    | Obs |
|-------|-------|-------|--------|-----|
| 37.45 | 30.10 | -1.00 | 100.00 | 476 |

**ca020\_2\_6\_**: Percent of Decrease in Income

| Mean  | SD    | Min   | Max    | Obs |
|-------|-------|-------|--------|-----|
| 36.99 | 28.51 | -1.00 | 100.00 | 185 |

**ca020\_2\_7\_**: Percent of Decrease in Income

| Mean  | SD    | Min   | Max    | Obs |
|-------|-------|-------|--------|-----|
| 35.84 | 30.71 | -1.00 | 100.00 | 74  |

**ca020\_2\_8\_**: Percent of Decrease in Income

| Mean  | SD    | Min   | Max    | Obs |
|-------|-------|-------|--------|-----|
| 32.97 | 28.35 | -1.00 | 100.00 | 29  |

**ca020\_2\_9\_**: Percent of Decrease in Income

| Mean  | SD    | Min   | Max    | Obs |
|-------|-------|-------|--------|-----|
| 34.73 | 31.56 | -1.00 | 100.00 | 11  |

**ca020\_2\_10\_**: Percent of Decrease in Income

| Mean  | SD    | Min   | Max   | Obs |
|-------|-------|-------|-------|-----|
| 37.33 | 28.51 | -1.00 | 70.00 | 6   |

**ca020\_2\_11\_**: Percent of Decrease in Income

| Mean  | SD    | Min   | Max   | Obs |
|-------|-------|-------|-------|-----|
| 14.50 | 21.92 | -1.00 | 30.00 | 2   |

**ca020\_2\_12\_**: Percent of Decrease in Income

| Mean  | SD | Min   | Max   | Obs |
|-------|----|-------|-------|-----|
| 50.00 | .  | 50.00 | 50.00 | 1   |

**cb001: Select Household Member from List**

| A String Variable |        |
|-------------------|--------|
| Obs:              | 11,157 |

**cb002: Household Other Members**

| A String Variable |        |
|-------------------|--------|
| Obs:              | 11,395 |

**cb003\_1\_: XHHOtherMemberName[1]'s Gender**

|          | Freq. | %      |
|----------|-------|--------|
| 1 Male   | 1,184 | 32.85  |
| 2 Female | 2,420 | 67.15  |
| Total    | 3,604 | 100.00 |

**cb003\_2\_: XHHOtherMemberName[2]'s Gender**

|          | Freq. | %      |
|----------|-------|--------|
| 1 Male   | 1,104 | 48.61  |
| 2 Female | 1,167 | 51.39  |
| Total    | 2,271 | 100.00 |

**cb003\_3\_: XHHOtherMemberName[3]'s Gender**

|          | Freq. | %      |
|----------|-------|--------|
| 1 Male   | 552   | 46.86  |
| 2 Female | 626   | 53.14  |
| Total    | 1,178 | 100.00 |

**cb003\_4\_: XHHOtherMemberName[4]'s Gender**

|          | Freq. | %      |
|----------|-------|--------|
| 1 Male   | 171   | 50.00  |
| 2 Female | 171   | 50.00  |
| Total    | 342   | 100.00 |

**cb003\_5\_: XHHOtherMemberName[5]'s Gender**

|          | Freq. | %      |
|----------|-------|--------|
| 1 Male   | 66    | 48.89  |
| 2 Female | 69    | 51.11  |
| Total    | 135   | 100.00 |

**cb003\_6\_:** XHHOtherMemberName[6]'s Gender

|          | Freq. | %      |
|----------|-------|--------|
| 1 Male   | 25    | 43.10  |
| 2 Female | 33    | 56.90  |
| Total    | 58    | 100.00 |

**cb003\_7\_:** XHHOtherMemberName[7]'s Gender

|          | Freq. | %      |
|----------|-------|--------|
| 1 Male   | 12    | 42.86  |
| 2 Female | 16    | 57.14  |
| Total    | 28    | 100.00 |

**cb003\_8\_:** XHHOtherMemberName[8]'s Gender

|          | Freq. | %      |
|----------|-------|--------|
| 1 Male   | 5     | 29.41  |
| 2 Female | 12    | 70.59  |
| Total    | 17    | 100.00 |

**cb003\_9\_:** XHHOtherMemberName[9]'s Gender

|          | Freq. | %      |
|----------|-------|--------|
| 1 Male   | 5     | 83.33  |
| 2 Female | 1     | 16.67  |
| Total    | 6     | 100.00 |

**cb003\_10\_:** XHHOtherMemberName[10]'s Gender

|          | Freq. | %      |
|----------|-------|--------|
| 2 Female | 1     | 100.00 |
| Total    | 1     | 100.00 |

**cb004\_1\_:** XHHOtherMemberName[1]'s Age

| Mean  | SD    | Min  | Max    | Obs   |
|-------|-------|------|--------|-------|
| 33.04 | 23.29 | 0.00 | 106.00 | 3,520 |

**cb004\_2\_:** XHHOtherMemberName[2]'s Age

| Mean  | SD    | Min  | Max   | Obs   |
|-------|-------|------|-------|-------|
| 14.76 | 15.11 | 0.00 | 90.00 | 2,247 |

**cb004\_3\_:** XHHOtherMemberName[3]'s Age

| Mean  | SD    | Min  | Max   | Obs   |
|-------|-------|------|-------|-------|
| 12.30 | 13.25 | 0.00 | 98.00 | 1,163 |



**cb004\_4\_:** XHHOtherMemberName[4]'s Age

| Mean  | SD    | Min  | Max   | Obs |
|-------|-------|------|-------|-----|
| 12.50 | 14.00 | 0.00 | 90.00 | 335 |

**cb004\_5\_:** XHHOtherMemberName[5]'s Age

| Mean  | SD    | Min  | Max   | Obs |
|-------|-------|------|-------|-----|
| 11.32 | 13.36 | 0.00 | 94.00 | 131 |

**cb004\_6\_:** XHHOtherMemberName[6]'s Age

| Mean  | SD    | Min  | Max   | Obs |
|-------|-------|------|-------|-----|
| 11.31 | 15.63 | 0.00 | 91.00 | 58  |

**cb004\_7\_:** XHHOtherMemberName[7]'s Age

| Mean  | SD   | Min  | Max   | Obs |
|-------|------|------|-------|-----|
| 10.43 | 9.65 | 0.00 | 35.00 | 28  |

**cb004\_8\_:** XHHOtherMemberName[8]'s Age

| Mean | SD   | Min  | Max   | Obs |
|------|------|------|-------|-----|
| 8.76 | 9.61 | 1.00 | 31.00 | 17  |

**cb004\_9\_:** XHHOtherMemberName[9]'s Age

| Mean | SD   | Min  | Max   | Obs |
|------|------|------|-------|-----|
| 6.33 | 7.50 | 1.00 | 20.00 | 6   |

**cb004\_10\_:** XHHOtherMemberName[10]'s Age

| Mean | SD | Min  | Max  | Obs |
|------|----|------|------|-----|
| 3.00 | .  | 3.00 | 3.00 | 1   |

**cb005\_1\_:** XHHOtherMemberName[1] is XFamilyR's?

|                                | Freq. | %     |
|--------------------------------|-------|-------|
| 1 Daughter-in-law/Son-in-law   | 1,775 | 49.25 |
| 2 Grandchild                   | 1,289 | 35.77 |
| 3 Brother-in-law/Sister-in-law | 1     | 0.03  |
| 4 Father                       | 72    | 2.00  |
| 5 Mother                       | 160   | 4.44  |
| 6 Mother-in-law                | 101   | 2.80  |
| 7 Father-in-law                | 56    | 1.55  |
| 8 Child                        | 58    | 1.61  |
| 9 Sibling                      | 30    | 0.83  |
| 10 Other Kind of Relative      | 62    | 1.72  |

|       |       |        |
|-------|-------|--------|
| Total | 3,604 | 100.00 |
|-------|-------|--------|

**cb005\_2\_:** XHHOtherMemberName[2] is XFamilyR's?

|                                | Freq. | %      |
|--------------------------------|-------|--------|
| 1 Daughter-in-law/Son-in-law   | 171   | 7.53   |
| 2 Grandchild                   | 1,931 | 85.03  |
| 3 Brother-in-law/Sister-in-law | 1     | 0.04   |
| 4 Father                       | 5     | 0.22   |
| 5 Mother                       | 35    | 1.54   |
| 6 Mother-in-law                | 18    | 0.79   |
| 7 Father-in-law                | 10    | 0.44   |
| 8 Child                        | 10    | 0.44   |
| 9 Sibling                      | 6     | 0.26   |
| 10 Other Kind of Relative      | 84    | 3.70   |
| Total                          | 2,271 | 100.00 |

**cb005\_3\_:** XHHOtherMemberName[3] is XFamilyR's?

|                                | Freq. | %      |
|--------------------------------|-------|--------|
| 1 Daughter-in-law/Son-in-law   | 116   | 9.85   |
| 2 Grandchild                   | 971   | 82.43  |
| 3 Brother-in-law/Sister-in-law | 3     | 0.25   |
| 4 Father                       | 1     | 0.08   |
| 5 Mother                       | 1     | 0.08   |
| 6 Mother-in-law                | 7     | 0.59   |
| 7 Father-in-law                | 1     | 0.08   |
| 8 Child                        | 4     | 0.34   |
| 9 Sibling                      | 2     | 0.17   |
| 10 Other Kind of Relative      | 72    | 6.11   |
| Total                          | 1,178 | 100.00 |

**cb005\_4\_:** XHHOtherMemberName[4] is XFamilyR's?

|                                | Freq. | %      |
|--------------------------------|-------|--------|
| 1 Daughter-in-law/Son-in-law   | 40    | 11.70  |
| 2 Grandchild                   | 241   | 70.47  |
| 3 Brother-in-law/Sister-in-law | 3     | 0.88   |
| 5 Mother                       | 1     | 0.29   |
| 6 Mother-in-law                | 1     | 0.29   |
| 7 Father-in-law                | 1     | 0.29   |
| 9 Sibling                      | 3     | 0.88   |
| 10 Other Kind of Relative      | 52    | 15.20  |
| Total                          | 342   | 100.00 |

**cb005\_5\_:** XHHOtherMemberName[5] is XFamilyR's?

|                              | Freq. | %     |
|------------------------------|-------|-------|
| 1 Daughter-in-law/Son-in-law | 14    | 10.37 |
| 2 Grandchild                 | 91    | 67.41 |
| 6 Mother-in-law              | 1     | 0.74  |
| 7 Father-in-law              | 1     | 0.74  |
| 10 Other Kind of Relative    | 28    | 20.74 |

|       |     |        |
|-------|-----|--------|
| Total | 135 | 100.00 |
|-------|-----|--------|

**cb005\_6\_:** XHHOtherMemberName[6] is XFamilyR's?

|                              | Freq. | %      |
|------------------------------|-------|--------|
| 1 Daughter-in-law/Son-in-law | 5     | 8.62   |
| 2 Grandchild                 | 39    | 67.24  |
| 6 Mother-in-law              | 1     | 1.72   |
| 8 Child                      | 1     | 1.72   |
| 10 Other Kind of Relative    | 12    | 20.69  |
| Total                        | 58    | 100.00 |

**cb005\_7\_:** XHHOtherMemberName[7] is XFamilyR's?

|                              | Freq. | %      |
|------------------------------|-------|--------|
| 1 Daughter-in-law/Son-in-law | 3     | 10.71  |
| 2 Grandchild                 | 18    | 64.29  |
| 10 Other Kind of Relative    | 7     | 25.00  |
| Total                        | 28    | 100.00 |

**cb005\_8\_:** XHHOtherMemberName[8] is XFamilyR's?

|                              | Freq. | %      |
|------------------------------|-------|--------|
| 1 Daughter-in-law/Son-in-law | 2     | 11.76  |
| 2 Grandchild                 | 10    | 58.82  |
| 10 Other Kind of Relative    | 5     | 29.41  |
| Total                        | 17    | 100.00 |

**cb005\_9\_:** XHHOtherMemberName[9] is XFamilyR's?

|                           | Freq. | %      |
|---------------------------|-------|--------|
| 2 Grandchild              | 3     | 50.00  |
| 10 Other Kind of Relative | 3     | 50.00  |
| Total                     | 6     | 100.00 |

**cb005\_10\_:** XHHOtherMemberName[10] is XFamilyR's?

|              | Freq. | %      |
|--------------|-------|--------|
| 2 Grandchild | 1     | 100.00 |
| Total        | 1     | 100.00 |

**cb006\_1\_:** Which Child of XFamilyR has XHHOtherMemberName[1] Been Married With?

| Mean | SD   | Min  | Max   | Obs   |
|------|------|------|-------|-------|
| 2.35 | 8.98 | 1.00 | 99.00 | 1,775 |

**cb006\_2\_:** Which Child of XFamilyR has XHHOtherMemberName[2] Been Married With?

| Mean  | SD    | Min  | Max   | Obs |
|-------|-------|------|-------|-----|
| 11.94 | 29.96 | 1.00 | 99.00 | 171 |

**cb006\_3\_:** Which Child of XFamilyR has XHHOtherMemberName[3] Been Married With?

| Mean | SD    | Min  | Max   | Obs |
|------|-------|------|-------|-----|
| 4.09 | 15.56 | 1.00 | 99.00 | 116 |

**cb006\_4\_:** Which Child of XFamilyR has XHHOtherMemberName[4] Been Married With?

| Mean | SD    | Min  | Max   | Obs |
|------|-------|------|-------|-----|
| 4.33 | 15.40 | 1.00 | 99.00 | 40  |

**cb006\_5\_:** Which Child of XFamilyR has XHHOtherMemberName[5] Been Married With?

| Mean | SD    | Min  | Max   | Obs |
|------|-------|------|-------|-----|
| 9.00 | 25.93 | 1.00 | 99.00 | 14  |

**cb006\_6\_:** Which Child of XFamilyR has XHHOtherMemberName[6] Been Married With?

| Mean | SD   | Min  | Max  | Obs |
|------|------|------|------|-----|
| 2.00 | 0.71 | 1.00 | 3.00 | 5   |

**cb006\_7\_:** Which Child of XFamilyR has XHHOtherMemberName[7] Been Married With?

| Mean | SD   | Min  | Max  | Obs |
|------|------|------|------|-----|
| 2.67 | 1.53 | 1.00 | 4.00 | 3   |

**cb006\_8\_:** Which Child of XFamilyR has XHHOtherMemberName[8] Been Married With?

| Mean | SD   | Min  | Max  | Obs |
|------|------|------|------|-----|
| 1.50 | 0.71 | 1.00 | 2.00 | 2   |

**cb007\_1\_:** Who is XHHOtherMemberName[1]'s Parent?

| Mean | SD    | Min  | Max   | Obs   |
|------|-------|------|-------|-------|
| 4.39 | 16.30 | 1.00 | 99.00 | 1,289 |

**cb007\_2\_:** Who is XHHOtherMemberName[1]'s Parent?

| Mean | SD    | Min  | Max   | Obs   |
|------|-------|------|-------|-------|
| 2.91 | 11.69 | 1.00 | 99.00 | 1,931 |

**cb007\_3\_:** Who is XHHOtherMemberName[1]'s Parent?

| Mean | SD    | Min  | Max   | Obs |
|------|-------|------|-------|-----|
| 4.31 | 16.35 | 1.00 | 99.00 | 971 |

**cb007\_4\_:** Who is XHHOtherMemberName[1]'s Parent?

| Mean | SD    | Min  | Max   | Obs |
|------|-------|------|-------|-----|
| 6.95 | 22.05 | 1.00 | 99.00 | 241 |

**cb007\_5\_:** Who is XHHOtherMemberName[1]'s Parent?

| Mean | SD    | Min  | Max   | Obs |
|------|-------|------|-------|-----|
| 7.24 | 22.26 | 1.00 | 99.00 | 91  |

**cb007\_6\_:** Who is XHHOtherMemberName[1]'s Parent?

| Mean | SD    | Min  | Max   | Obs |
|------|-------|------|-------|-----|
| 4.54 | 15.55 | 1.00 | 99.00 | 39  |

**cb007\_7\_:** Who is XHHOtherMemberName[1]'s Parent?

| Mean | SD    | Min  | Max   | Obs |
|------|-------|------|-------|-----|
| 7.17 | 22.93 | 1.00 | 99.00 | 18  |

**cb007\_8\_:** Who is XHHOtherMemberName[1]'s Parent?

| Mean | SD   | Min  | Max  | Obs |
|------|------|------|------|-----|
| 2.10 | 0.88 | 1.00 | 4.00 | 10  |

**cb007\_9\_:** Who is XHHOtherMemberName[1]'s Parent?

| Mean | SD   | Min  | Max  | Obs |
|------|------|------|------|-----|
| 1.33 | 0.58 | 1.00 | 2.00 | 3   |

**cb007\_10\_:** Who is XHHOtherMemberName[1]'s Parent?

| Mean | SD | Min  | Max  | Obs |
|------|----|------|------|-----|
| 1.00 | .  | 1.00 | 1.00 | 1   |

**cc001:** Children/Grandchildren Were Unable to Return Home Due To the COVID-19 Pandemic

|       | Freq.  | %      |
|-------|--------|--------|
| 1 Yes | 2,349  | 20.61  |
| 2 No  | 9,046  | 79.39  |
| Total | 11,395 | 100.00 |

**cc001\_1: Number of Children/Grandchildren Who Were Unable to Return Home**

| Mean | SD   | Min  | Max   | Obs   |
|------|------|------|-------|-------|
| 3.33 | 2.60 | 1.00 | 15.00 | 2,349 |

**cc002: Relatives/Friends Were Unable to Visit XFamilyR**

|       | Freq.  | %      |
|-------|--------|--------|
| 1 Yes | 7,282  | 63.91  |
| 2 No  | 4,113  | 36.09  |
| Total | 11,395 | 100.00 |

**cc003: XFamilyRAndS Received Less Money in Lunar January(Zhengyue)**

|       | Freq. | %      |
|-------|-------|--------|
| 1 Yes | 2,427 | 31.22  |
| 2 No  | 5,347 | 68.78  |
| Total | 7,774 | 100.00 |

**cc003\_1: Amount of Yuan Less Than Previous Years**

| Mean     | SD       | Min  | Max        | Obs   |
|----------|----------|------|------------|-------|
| 1,277.87 | 2,603.46 | 0.00 | 100,000.00 | 2,427 |

**cc004: Spent Less Money Giving Hongbao(Red Envelop)**

|       | Freq. | %      |
|-------|-------|--------|
| 1 Yes | 3,193 | 41.07  |
| 2 No  | 4,581 | 58.93  |
| Total | 7,774 | 100.00 |

**cc004\_1: Amount of Yuan Less Than Previous Years**

| Mean     | SD       | Min  | Max       | Obs   |
|----------|----------|------|-----------|-------|
| 1,053.21 | 1,206.11 | 1.00 | 20,000.00 | 3,193 |

**cc005: Did XFamilyRAndS Mostly Live Together in Lunar January(Zhengyue)?**

|       | Freq. | %      |
|-------|-------|--------|
| 1 Yes | 7,961 | 96.08  |
| 2 No  | 325   | 3.92   |
| Total | 8,286 | 100.00 |

**cc006\_1\_:** Who Did XCoupleList[1] Live With in Lunar January(Zhengyue)?

| A String Variable |        |
|-------------------|--------|
| Obs:              | 11,237 |

**cc006\_2\_:** Who Did XCoupleList[2] Live With in Lunar January(Zhengyue)?

| A String Variable |     |
|-------------------|-----|
| Obs:              | 323 |

**cc007\_1\_:** Who Else Lived With CouLiveList[1] in Lunar January(Zhengyue)?

| A String Variable |        |
|-------------------|--------|
| Obs:              | 11,394 |

**cc007\_2\_:** Who Else Lived With CouLiveList[2] in Lunar January(Zhengyue)?

| A String Variable |     |
|-------------------|-----|
| Obs:              | 325 |

**cc008\_1\_:** More or Fewer People Lived With XCouLiveList[1] in Lunar January(Zhengyue)?

|                 | Freq.  | %      |
|-----------------|--------|--------|
| 1 More People   | 842    | 7.39   |
| 2 Fewer People  | 2,506  | 22.00  |
| 3 No Difference | 8,045  | 70.61  |
| Total           | 11,393 | 100.00 |

**cc008\_2\_:** More or Fewer People Lived With XCouLiveList[2] in Lunar January(Zhengyue)?

|                 | Freq. | %      |
|-----------------|-------|--------|
| 1 More People   | 19    | 5.85   |
| 2 Fewer People  | 118   | 36.31  |
| 3 No Difference | 188   | 57.85  |
| Total           | 325   | 100.00 |

**xhhmembernum:** Number of Household Members

| Mean | SD   | Min  | Max   | Obs    |
|------|------|------|-------|--------|
| 1.14 | 1.55 | 0.00 | 14.00 | 11,395 |

**xhhmemberage\_1\_:** XHHMemberName[1]'s Age

| Mean  | SD    | Min  | Max    | Obs   |
|-------|-------|------|--------|-------|
| 34.07 | 16.99 | 1.00 | 117.00 | 5,586 |

**xhhmemberage\_2\_**: XHHMemberName[2]'s Age

| Mean  | SD    | Min  | Max   | Obs   |
|-------|-------|------|-------|-------|
| 29.99 | 18.62 | 0.00 | 99.00 | 3,319 |

**xhhmemberage\_3\_**: XHHMemberName[3]'s Age

| Mean  | SD    | Min  | Max   | Obs   |
|-------|-------|------|-------|-------|
| 16.98 | 16.14 | 0.00 | 95.00 | 2,058 |

**xhhmemberage\_4\_**: XHHMemberName[4]'s Age

| Mean  | SD    | Min  | Max   | Obs   |
|-------|-------|------|-------|-------|
| 14.19 | 14.93 | 0.00 | 98.00 | 1,148 |

**xhhmemberage\_5\_**: XHHMemberName[5]'s Age

| Mean  | SD    | Min  | Max   | Obs |
|-------|-------|------|-------|-----|
| 13.00 | 14.76 | 0.00 | 95.00 | 365 |

**xhhmemberage\_6\_**: XHHMemberName[6]'s Age

| Mean  | SD    | Min  | Max   | Obs |
|-------|-------|------|-------|-----|
| 12.82 | 14.85 | 0.00 | 94.00 | 158 |

**xhhmemberage\_7\_**: XHHMemberName[7]'s Age

| Mean  | SD    | Min  | Max   | Obs |
|-------|-------|------|-------|-----|
| 12.76 | 15.55 | 0.00 | 91.00 | 85  |

**xhhmemberage\_8\_**: XHHMemberName[8]'s Age

| Mean  | SD    | Min  | Max   | Obs |
|-------|-------|------|-------|-----|
| 12.19 | 14.68 | 0.00 | 59.00 | 43  |

**xhhmemberage\_9\_**: XHHMemberName[9]'s Age

| Mean | SD   | Min  | Max   | Obs |
|------|------|------|-------|-----|
| 8.14 | 8.06 | 0.00 | 35.00 | 22  |

**xhhmemberage\_10\_**: XHHMemberName[10]'s Age

| Mean  | SD    | Min  | Max   | Obs |
|-------|-------|------|-------|-----|
| 10.29 | 10.37 | 1.00 | 31.00 | 14  |



**xhhmemberage\_11\_:** XHHMemberName[11]'s Age

| Mean  | SD   | Min  | Max   | Obs |
|-------|------|------|-------|-----|
| 11.43 | 9.93 | 1.00 | 28.00 | 7   |

**xhhmemberage\_12\_:** XHHMemberName[12]'s Age

| Mean | SD    | Min  | Max   | Obs |
|------|-------|------|-------|-----|
| 9.67 | 13.32 | 1.00 | 25.00 | 3   |

**xhhmemberage\_13\_:** XHHMemberName[13]'s Age

| Mean  | SD | Min   | Max   | Obs |
|-------|----|-------|-------|-----|
| 23.00 | .  | 23.00 | 23.00 | 1   |

**xhhmemberage\_14\_:** XHHMemberName[14]'s Age

| Mean  | SD | Min   | Max   | Obs |
|-------|----|-------|-------|-----|
| 20.00 | .  | 20.00 | 20.00 | 1   |

**xhhothmembrnum:** Number of Household Other Members

| Mean | SD   | Min  | Max   | Obs    |
|------|------|------|-------|--------|
| 0.67 | 1.19 | 0.00 | 10.00 | 11,395 |

**xaffectreunion:** Family Reunion Was Affected By the COVID-19 Pandemic

|       | Freq.  | %      |
|-------|--------|--------|
| 0 No  | 3,621  | 31.78  |
| 1 Yes | 7,774  | 68.22  |
| Total | 11,395 | 100.00 |

**xchildalivenum:** Number of Children Alive

| Mean | SD   | Min  | Max   | Obs    |
|------|------|------|-------|--------|
| 2.54 | 1.36 | 0.00 | 10.00 | 11,405 |

**xchildpanalivenum:** Number of Children Alive When the COVID Pandemic Started

| Mean | SD   | Min  | Max   | Obs    |
|------|------|------|-------|--------|
| 2.54 | 1.37 | 0.00 | 10.00 | 11,405 |

**xchildnum:** Number of Children

| Mean | SD | Min | Max | Obs |
|------|----|-----|-----|-----|
|------|----|-----|-----|-----|

|      |      |      |       |        |
|------|------|------|-------|--------|
| 2.56 | 1.38 | 0.00 | 10.00 | 11,405 |
|------|------|------|-------|--------|

#### xchildalive\_1\_: Is ZChildName[1] Still Alive When R is Interviewed

|       | Freq.  | %      |
|-------|--------|--------|
| 0 No  | 59     | 0.55   |
| 1 Yes | 10,725 | 99.45  |
| Total | 10,784 | 100.00 |

#### xchildalive\_2\_: Is ZChildName[2] Still Alive When R is Interviewed

|       | Freq. | %      |
|-------|-------|--------|
| 0 No  | 46    | 0.52   |
| 1 Yes | 8,833 | 99.48  |
| Total | 8,879 | 100.00 |

#### xchildalive\_3\_: Is ZChildName[3] Still Alive When R is Interviewed

|       | Freq. | %      |
|-------|-------|--------|
| 0 No  | 44    | 0.90   |
| 1 Yes | 4,836 | 99.10  |
| Total | 4,880 | 100.00 |

#### xchildalive\_4\_: Is ZChildName[4] Still Alive When R is Interviewed

|       | Freq. | %      |
|-------|-------|--------|
| 0 No  | 36    | 1.42   |
| 1 Yes | 2,500 | 98.58  |
| Total | 2,536 | 100.00 |

#### xchildalive\_5\_: Is ZChildName[5] Still Alive When R is Interviewed

|       | Freq. | %      |
|-------|-------|--------|
| 0 No  | 16    | 1.36   |
| 1 Yes | 1,161 | 98.64  |
| Total | 1,177 | 100.00 |

#### xchildalive\_6\_: Is ZChildName[6] Still Alive When R is Interviewed

|       | Freq. | %      |
|-------|-------|--------|
| 0 No  | 14    | 2.77   |
| 1 Yes | 491   | 97.23  |
| Total | 505   | 100.00 |

#### xchildalive\_7\_: Is ZChildName[7] Still Alive When R is Interviewed

|       | Freq. | %     |
|-------|-------|-------|
| 0 No  | 5     | 2.18  |
| 1 Yes | 224   | 97.82 |

|       |     |        |
|-------|-----|--------|
| Total | 229 | 100.00 |
|-------|-----|--------|

**xchildalive\_8\_:** Is ZChildName[8] Still Alive When R is Interviewed

|       | Freq. | %      |
|-------|-------|--------|
| 0 No  | 6     | 6.19   |
| 1 Yes | 91    | 93.81  |
| Total | 97    | 100.00 |

**xchildalive\_9\_:** Is ZChildName[9] Still Alive When R is Interviewed

|       | Freq. | %      |
|-------|-------|--------|
| 0 No  | 2     | 5.26   |
| 1 Yes | 36    | 94.74  |
| Total | 38    | 100.00 |

**xchildalive\_10\_:** Is ZChildName[10] Still Alive When R is Interviewed

|       | Freq. | %      |
|-------|-------|--------|
| 0 No  | 2     | 9.52   |
| 1 Yes | 19    | 90.48  |
| Total | 21    | 100.00 |

**xchildalive\_11\_:** Is ZChildName[11] Still Alive When R is Interviewed

|       | Freq. | %      |
|-------|-------|--------|
| 0 No  | 1     | 11.11  |
| 1 Yes | 8     | 88.89  |
| Total | 9     | 100.00 |

**xchildalive\_12\_:** Is ZChildName[12] Still Alive When R is Interviewed

|       | Freq. | %      |
|-------|-------|--------|
| 1 Yes | 3     | 100.00 |
| Total | 3     | 100.00 |

**xchildalive\_13\_:** Is ZChildName[13] Still Alive When R is Interviewed

|       | Freq. | %      |
|-------|-------|--------|
| 1 Yes | 1     | 100.00 |
| Total | 1     | 100.00 |

**xchildalive\_14\_:** Is ZChildName[14] Still Alive When R is Interviewed

|                 |  |  |
|-----------------|--|--|
| No Observations |  |  |
|-----------------|--|--|

**xchildalive\_15\_:** Is ZChildName[15] Still Alive When R is Interviewed

---

No Observations

---

**xchildalive\_16\_:** Is ZChildName[16] Still Alive When R is Interviewed

---

No Observations

---

**xchildalive\_17\_:** Is ZChildName[17] Still Alive When R is Interviewed

|       | Freq. | %      |
|-------|-------|--------|
| 1 Yes | 1     | 100.00 |
| Total | 1     | 100.00 |

**xchildpanalive\_1\_:** ZChildName[1] Was Still Alive When the COVID-19 Pandemic Started

|       | Freq.  | %      |
|-------|--------|--------|
| 0 No  | 50     | 0.46   |
| 1 Yes | 10,734 | 99.54  |
| Total | 10,784 | 100.00 |

**xchildpanalive\_2\_:** ZChildName[2] Was Still Alive When the COVID-19 Pandemic Started

|       | Freq. | %      |
|-------|-------|--------|
| 0 No  | 39    | 0.44   |
| 1 Yes | 8,840 | 99.56  |
| Total | 8,879 | 100.00 |

**xchildpanalive\_3\_:** ZChildName[3] Was Still Alive When the COVID-19 Pandemic Started

|       | Freq. | %      |
|-------|-------|--------|
| 0 No  | 36    | 0.74   |
| 1 Yes | 4,844 | 99.26  |
| Total | 4,880 | 100.00 |

**xchildpanalive\_4\_:** ZChildName[4] Was Still Alive When the COVID-19 Pandemic Started

|       | Freq. | %      |
|-------|-------|--------|
| 0 No  | 29    | 1.14   |
| 1 Yes | 2,507 | 98.86  |
| Total | 2,536 | 100.00 |

**xchildpanalive\_5\_:** ZChildName[5] Was Still Alive When the COVID-19 Pandemic Started

|      | Freq. | %    |
|------|-------|------|
| 0 No | 14    | 1.19 |

|       |       |        |
|-------|-------|--------|
| 1 Yes | 1,163 | 98.81  |
| Total | 1,177 | 100.00 |

**xchildpanalive\_6\_:** ZChildName[6] Was Still Alive When the COVID-19 Pandemic Started

|       | Freq. | %      |
|-------|-------|--------|
| 0 No  | 12    | 2.38   |
| 1 Yes | 493   | 97.62  |
| Total | 505   | 100.00 |

**xchildpanalive\_7\_:** ZChildName[7] Was Still Alive When the COVID-19 Pandemic Started

|       | Freq. | %      |
|-------|-------|--------|
| 0 No  | 3     | 1.31   |
| 1 Yes | 226   | 98.69  |
| Total | 229   | 100.00 |

**xchildpanalive\_8\_:** ZChildName[8] Was Still Alive When the COVID-19 Pandemic Started

|       | Freq. | %      |
|-------|-------|--------|
| 0 No  | 6     | 6.19   |
| 1 Yes | 91    | 93.81  |
| Total | 97    | 100.00 |

**xchildpanalive\_9\_:** ZChildName[9] Was Still Alive When the COVID-19 Pandemic Started

|       | Freq. | %      |
|-------|-------|--------|
| 0 No  | 2     | 5.26   |
| 1 Yes | 36    | 94.74  |
| Total | 38    | 100.00 |

**xchildpanalive\_10\_:** ZChildName[10] Was Still Alive When the COVID-19 Pandemic Started

|       | Freq. | %      |
|-------|-------|--------|
| 0 No  | 2     | 9.52   |
| 1 Yes | 19    | 90.48  |
| Total | 21    | 100.00 |

**xchildpanalive\_11\_:** ZChildName[11] Was Still Alive When the COVID-19 Pandemic Started

|       | Freq. | %      |
|-------|-------|--------|
| 0 No  | 1     | 11.11  |
| 1 Yes | 8     | 88.89  |
| Total | 9     | 100.00 |

**xchildpanalive\_12\_:** ZChildName[12] Was Still Alive When the COVID-19 Pandemic Started

|       | Freq. | %      |
|-------|-------|--------|
| 1 Yes | 3     | 100.00 |
| Total | 3     | 100.00 |

**xchildpanalive\_13\_:** ZChildName[13] Was Still Alive When the COVID-19 Pandemic Started

|       | Freq. | %      |
|-------|-------|--------|
| 1 Yes | 1     | 100.00 |
| Total | 1     | 100.00 |

**xchildpanalive\_14\_:** ZChildName[14] Was Still Alive When the COVID-19 Pandemic Started

|                 |
|-----------------|
| No Observations |
|-----------------|

**xchildpanalive\_15\_:** ZChildName[15] Was Still Alive When the COVID-19 Pandemic Started

|                 |
|-----------------|
| No Observations |
|-----------------|

**xchildpanalive\_16\_:** ZChildName[16] Was Still Alive When the COVID-19 Pandemic Started

|                 |
|-----------------|
| No Observations |
|-----------------|

**xchildpanalive\_17\_:** ZChildName[17] Was Still Alive When the COVID-19 Pandemic Started

|       | Freq. | %      |
|-------|-------|--------|
| 1 Yes | 1     | 100.00 |
| Total | 1     | 100.00 |

**xchildbirth\_1\_:** ZChildName[1]'s Birth Year (updated after CA005)

| Mean     | SD    | Min      | Max      | Obs    |
|----------|-------|----------|----------|--------|
| 1,981.56 | 10.56 | 1,942.00 | 2,015.00 | 10,734 |

**xchildbirth\_2\_:** ZChildName[2]'s Birth Year (updated after CA005)

| Mean     | SD    | Min      | Max      | Obs   |
|----------|-------|----------|----------|-------|
| 1,981.22 | 11.32 | 1,903.00 | 2,018.00 | 8,840 |

**xchildbirth\_3\_:** ZChildName[3]'s Birth Year (updated after CA005)

| Mean     | SD    | Min      | Max      | Obs   |
|----------|-------|----------|----------|-------|
| 1,978.10 | 10.63 | 1,900.00 | 2,018.00 | 4,844 |

**xchildbirth\_4\_:** ZChildName[4]'s Birth Year (updated after CA005)

| Mean     | SD    | Min      | Max      | Obs   |
|----------|-------|----------|----------|-------|
| 1,975.81 | 10.00 | 1,922.00 | 2,015.00 | 2,507 |

**xchildbirth\_5\_:** ZChildName[5]'s Birth Year (updated after CA005)

| Mean     | SD   | Min      | Max      | Obs   |
|----------|------|----------|----------|-------|
| 1,974.31 | 9.66 | 1,948.00 | 2,015.00 | 1,163 |

**xchildbirth\_6\_:** ZChildName[6]'s Birth Year (updated after CA005)

| Mean     | SD   | Min      | Max      | Obs |
|----------|------|----------|----------|-----|
| 1,973.82 | 9.34 | 1,947.00 | 2,015.00 | 493 |

**xchildbirth\_7\_:** ZChildName[7]'s Birth Year (updated after CA005)

| Mean     | SD    | Min      | Max      | Obs |
|----------|-------|----------|----------|-----|
| 1,973.24 | 10.35 | 1,948.00 | 2,015.00 | 226 |

**xchildbirth\_8\_:** ZChildName[8]'s Birth Year (updated after CA005)

| Mean     | SD    | Min      | Max      | Obs |
|----------|-------|----------|----------|-----|
| 1,974.14 | 11.54 | 1,950.00 | 2,015.00 | 91  |

**xchildbirth\_9\_:** ZChildName[9]'s Birth Year (updated after CA005)

| Mean     | SD   | Min      | Max      | Obs |
|----------|------|----------|----------|-----|
| 1,972.58 | 8.87 | 1,955.00 | 1,991.00 | 36  |

**xchildbirth\_10\_:** ZChildName[10]'s Birth Year (updated after CA005)

| Mean     | SD   | Min      | Max      | Obs |
|----------|------|----------|----------|-----|
| 1,970.89 | 4.19 | 1,961.00 | 1,977.00 | 19  |

**xchildbirth\_11\_:** ZChildName[11]'s Birth Year (updated after CA005)

| Mean     | SD   | Min      | Max      | Obs |
|----------|------|----------|----------|-----|
| 1,975.75 | 6.54 | 1,964.00 | 1,986.00 | 8   |

**xchildbirth\_12\_:** ZChildName[12]'s Birth Year (updated after CA005)

| Mean     | SD   | Min      | Max      | Obs |
|----------|------|----------|----------|-----|
| 1,981.33 | 5.86 | 1,977.00 | 1,988.00 | 3   |

**xchildbirth\_13\_:** ZChildName[13]'s Birth Year (updated after CA005)

| Mean     | SD | Min      | Max      | Obs |
|----------|----|----------|----------|-----|
| 1,988.00 | .  | 1,988.00 | 1,988.00 | 1   |

**xchildbirth\_14\_:** ZChildName[14]'s Birth Year (updated after CA005)

|                 |  |  |  |  |
|-----------------|--|--|--|--|
| No Observations |  |  |  |  |
|-----------------|--|--|--|--|

**xchildbirth\_15\_:** ZChildName[15]'s Birth Year (updated after CA005)

|                 |  |  |  |  |
|-----------------|--|--|--|--|
| No Observations |  |  |  |  |
|-----------------|--|--|--|--|

**xchildbirth\_16\_:** ZChildName[16]'s Birth Year (updated after CA005)

|                 |  |  |  |  |
|-----------------|--|--|--|--|
| No Observations |  |  |  |  |
|-----------------|--|--|--|--|

**xchildbirth\_17\_:** ZChildName[17]'s Birth Year (updated after CA005)

| Mean     | SD | Min      | Max      | Obs |
|----------|----|----------|----------|-----|
| 1,981.00 | .  | 1,981.00 | 1,981.00 | 1   |

**xchildgender\_1\_:** ZChildName[1]'s Gender (updated after CA006)

|          | Freq.  | %      |
|----------|--------|--------|
| 1 Male   | 7,070  | 65.87  |
| 2 Female | 3,664  | 34.13  |
| Total    | 10,734 | 100.00 |

**xchildgender\_2\_:** ZChildName[2]'s Gender (updated after CA006)

|          | Freq. | %      |
|----------|-------|--------|
| 1 Male   | 4,468 | 50.54  |
| 2 Female | 4,372 | 49.46  |
| Total    | 8,840 | 100.00 |

**xchildgender\_3\_:** ZChildName[3]'s Gender (updated after CA006)

|          | Freq. | %      |
|----------|-------|--------|
| 1 Male   | 2,023 | 41.76  |
| 2 Female | 2,821 | 58.24  |
| Total    | 4,844 | 100.00 |



**xchildgender\_4\_:** ZChildName[4]'s Gender (updated after CA006)

|          | Freq. | %      |
|----------|-------|--------|
| 1 Male   | 880   | 35.10  |
| 2 Female | 1,627 | 64.90  |
| Total    | 2,507 | 100.00 |

**xchildgender\_5\_:** ZChildName[5]'s Gender (updated after CA006)

|          | Freq. | %      |
|----------|-------|--------|
| 1 Male   | 356   | 30.61  |
| 2 Female | 807   | 69.39  |
| Total    | 1,163 | 100.00 |

**xchildgender\_6\_:** ZChildName[6]'s Gender (updated after CA006)

|          | Freq. | %      |
|----------|-------|--------|
| 1 Male   | 138   | 27.99  |
| 2 Female | 355   | 72.01  |
| Total    | 493   | 100.00 |

**xchildgender\_7\_:** ZChildName[7]'s Gender (updated after CA006)

|          | Freq. | %      |
|----------|-------|--------|
| 1 Male   | 69    | 30.53  |
| 2 Female | 157   | 69.47  |
| Total    | 226   | 100.00 |

**xchildgender\_8\_:** ZChildName[8]'s Gender (updated after CA006)

|          | Freq. | %      |
|----------|-------|--------|
| 1 Male   | 26    | 28.57  |
| 2 Female | 65    | 71.43  |
| Total    | 91    | 100.00 |

**xchildgender\_9\_:** ZChildName[9]'s Gender (updated after CA006)

|          | Freq. | %      |
|----------|-------|--------|
| 1 Male   | 8     | 22.22  |
| 2 Female | 28    | 77.78  |
| Total    | 36    | 100.00 |

**xchildgender\_10\_:** ZChildName[10]'s Gender (updated after CA006)

|          | Freq. | %      |
|----------|-------|--------|
| 1 Male   | 9     | 47.37  |
| 2 Female | 10    | 52.63  |
| Total    | 19    | 100.00 |

**xchildgender\_11\_:** ZChildName[11]'s Gender (updated after CA006)

|          | Freq. | %      |
|----------|-------|--------|
| 1 Male   | 2     | 25.00  |
| 2 Female | 6     | 75.00  |
| Total    | 8     | 100.00 |

**xchildgender\_12\_:** ZChildName[12]'s Gender (updated after CA006)

|          | Freq. | %      |
|----------|-------|--------|
| 1 Male   | 1     | 33.33  |
| 2 Female | 2     | 66.67  |
| Total    | 3     | 100.00 |

**xchildgender\_13\_:** ZChildName[13]'s Gender (updated after CA006)

|        | Freq. | %      |
|--------|-------|--------|
| 1 Male | 1     | 100.00 |
| Total  | 1     | 100.00 |

**xchildgender\_14\_:** ZChildName[14]'s Gender (updated after CA006)

|                 |  |  |
|-----------------|--|--|
| No Observations |  |  |
|-----------------|--|--|

**xchildgender\_15\_:** ZChildName[15]'s Gender (updated after CA006)

|                 |  |  |
|-----------------|--|--|
| No Observations |  |  |
|-----------------|--|--|

**xchildgender\_16\_:** ZChildName[16]'s Gender (updated after CA006)

|                 |  |  |
|-----------------|--|--|
| No Observations |  |  |
|-----------------|--|--|

**xchildgender\_17\_:** ZChildName[17]'s Gender (updated after CA006)

|          | Freq. | %      |
|----------|-------|--------|
| 2 Female | 1     | 100.00 |
| Total    | 1     | 100.00 |

**xchildedu\_1\_:** ZChildName[1]'s Highest Degree (update after CA007)

|                                            | Freq. | %     |
|--------------------------------------------|-------|-------|
| 1 No Formal Education(Illiterate)          | 272   | 2.53  |
| 2 Did not Finish Primary School            | 838   | 7.81  |
| 4 Elementary School                        | 1,958 | 18.24 |
| 5 Middle School                            | 3,500 | 32.61 |
| 6 High School                              | 1,383 | 12.88 |
| 7 Vocational School                        | 735   | 6.85  |
| 8 Two-/Three-Year College/Associate Degree | 879   | 8.19  |
| 9 Four-Year College/Bachelor's Degree      | 1,013 | 9.44  |

|                         |        |        |
|-------------------------|--------|--------|
| 10 Master's Degree      | 122    | 1.14   |
| 11 Doctoral Degree/Ph.D | 15     | 0.14   |
| 997 Don't Know          | 18     | 0.17   |
| 999 Refuse              | 1      | 0.01   |
| Total                   | 10,734 | 100.00 |

**xchildedu\_2\_:** ZChildName[2]'s Highest Degree (update after CA007)

|                                            | Freq. | %      |
|--------------------------------------------|-------|--------|
| 1 No Formal Education(Illiterate)          | 342   | 3.87   |
| 2 Did not Finish Primary School            | 980   | 11.09  |
| 3 Sishu/Home School                        | 1     | 0.01   |
| 4 Elementary School                        | 1,895 | 21.44  |
| 5 Middle School                            | 2,954 | 33.42  |
| 6 High School                              | 857   | 9.69   |
| 7 Vocational School                        | 530   | 6.00   |
| 8 Two-/Three-Year College/Associate Degree | 558   | 6.31   |
| 9 Four-Year College/Bachelor's Degree      | 642   | 7.26   |
| 10 Master's Degree                         | 53    | 0.60   |
| 11 Doctoral Degree/Ph.D                    | 8     | 0.09   |
| 997 Don't Know                             | 18    | 0.20   |
| 999 Refuse                                 | 2     | 0.02   |
| Total                                      | 8,840 | 100.00 |

**xchildedu\_3\_:** ZChildName[3]'s Highest Degree (update after CA007)

|                                            | Freq. | %      |
|--------------------------------------------|-------|--------|
| 1 No Formal Education(Illiterate)          | 317   | 6.54   |
| 2 Did not Finish Primary School            | 642   | 13.25  |
| 4 Elementary School                        | 1,196 | 24.69  |
| 5 Middle School                            | 1,596 | 32.95  |
| 6 High School                              | 410   | 8.46   |
| 7 Vocational School                        | 219   | 4.52   |
| 8 Two-/Three-Year College/Associate Degree | 219   | 4.52   |
| 9 Four-Year College/Bachelor's Degree      | 213   | 4.40   |
| 10 Master's Degree                         | 19    | 0.39   |
| 11 Doctoral Degree/Ph.D                    | 3     | 0.06   |
| 997 Don't Know                             | 9     | 0.19   |
| 999 Refuse                                 | 1     | 0.02   |
| Total                                      | 4,844 | 100.00 |

**xchildedu\_4\_:** ZChildName[4]'s Highest Degree (update after CA007)

|                                            | Freq. | %     |
|--------------------------------------------|-------|-------|
| 1 No Formal Education(Illiterate)          | 211   | 8.42  |
| 2 Did not Finish Primary School            | 405   | 16.15 |
| 3 Sishu/Home School                        | 1     | 0.04  |
| 4 Elementary School                        | 683   | 27.24 |
| 5 Middle School                            | 733   | 29.24 |
| 6 High School                              | 185   | 7.38  |
| 7 Vocational School                        | 88    | 3.51  |
| 8 Two-/Three-Year College/Associate Degree | 83    | 3.31  |
| 9 Four-Year College/Bachelor's Degree      | 94    | 3.75  |
| 10 Master's Degree                         | 6     | 0.24  |
| 11 Doctoral Degree/Ph.D                    | 2     | 0.08  |

|                |       |        |
|----------------|-------|--------|
| 997 Don't Know | 15    | 0.60   |
| 999 Refuse     | 1     | 0.04   |
| Total          | 2,507 | 100.00 |

#### xchildedu\_5\_: ZChildName[5]'s Highest Degree (update after CA007)

|                                            | Freq. | %      |
|--------------------------------------------|-------|--------|
| 1 No Formal Education(Illiterate)          | 164   | 14.10  |
| 2 Did not Finish Primary School            | 199   | 17.11  |
| 4 Elementary School                        | 304   | 26.14  |
| 5 Middle School                            | 312   | 26.83  |
| 6 High School                              | 77    | 6.62   |
| 7 Vocational School                        | 37    | 3.18   |
| 8 Two-/Three-Year College/Associate Degree | 19    | 1.63   |
| 9 Four-Year College/Bachelor's Degree      | 34    | 2.92   |
| 10 Master's Degree                         | 4     | 0.34   |
| 11 Doctoral Degree/Ph.D                    | 2     | 0.17   |
| 997 Don't Know                             | 11    | 0.95   |
| Total                                      | 1,163 | 100.00 |

#### xchildedu\_6\_: ZChildName[6]'s Highest Degree (update after CA007)

|                                            | Freq. | %      |
|--------------------------------------------|-------|--------|
| 1 No Formal Education(Illiterate)          | 82    | 16.63  |
| 2 Did not Finish Primary School            | 90    | 18.26  |
| 3 Sishu/Home School                        | 1     | 0.20   |
| 4 Elementary School                        | 118   | 23.94  |
| 5 Middle School                            | 130   | 26.37  |
| 6 High School                              | 28    | 5.68   |
| 7 Vocational School                        | 14    | 2.84   |
| 8 Two-/Three-Year College/Associate Degree | 7     | 1.42   |
| 9 Four-Year College/Bachelor's Degree      | 14    | 2.84   |
| 10 Master's Degree                         | 1     | 0.20   |
| 997 Don't Know                             | 8     | 1.62   |
| Total                                      | 493   | 100.00 |

#### xchildedu\_7\_: ZChildName[7]'s Highest Degree (update after CA007)

|                                            | Freq. | %      |
|--------------------------------------------|-------|--------|
| 1 No Formal Education(Illiterate)          | 50    | 22.12  |
| 2 Did not Finish Primary School            | 43    | 19.03  |
| 4 Elementary School                        | 54    | 23.89  |
| 5 Middle School                            | 46    | 20.35  |
| 6 High School                              | 14    | 6.19   |
| 7 Vocational School                        | 8     | 3.54   |
| 8 Two-/Three-Year College/Associate Degree | 1     | 0.44   |
| 9 Four-Year College/Bachelor's Degree      | 7     | 3.10   |
| 10 Master's Degree                         | 1     | 0.44   |
| 997 Don't Know                             | 2     | 0.88   |
| Total                                      | 226   | 100.00 |

#### xchildedu\_8\_: ZChildName[8]'s Highest Degree (update after CA007)

|                                            | Freq. | %      |
|--------------------------------------------|-------|--------|
| 1 No Formal Education(Illiterate)          | 20    | 21.98  |
| 2 Did not Finish Primary School            | 18    | 19.78  |
| 4 Elementary School                        | 20    | 21.98  |
| 5 Middle School                            | 19    | 20.88  |
| 6 High School                              | 5     | 5.49   |
| 7 Vocational School                        | 2     | 2.20   |
| 8 Two-/Three-Year College/Associate Degree | 4     | 4.40   |
| 9 Four-Year College/Bachelor's Degree      | 1     | 1.10   |
| 997 Don't Know                             | 2     | 2.20   |
| Total                                      | 91    | 100.00 |

**xchildedu\_9\_:** ZChildName[9]'s Highest Degree (update after CA007)

|                                            | Freq. | %      |
|--------------------------------------------|-------|--------|
| 1 No Formal Education(Illiterate)          | 9     | 25.00  |
| 2 Did not Finish Primary School            | 8     | 22.22  |
| 4 Elementary School                        | 5     | 13.89  |
| 5 Middle School                            | 11    | 30.56  |
| 6 High School                              | 1     | 2.78   |
| 8 Two-/Three-Year College/Associate Degree | 1     | 2.78   |
| 997 Don't Know                             | 1     | 2.78   |
| Total                                      | 36    | 100.00 |

**xchildedu\_10\_:** ZChildName[10]'s Highest Degree (update after CA007)

|                                            | Freq. | %      |
|--------------------------------------------|-------|--------|
| 1 No Formal Education(Illiterate)          | 4     | 21.05  |
| 2 Did not Finish Primary School            | 4     | 21.05  |
| 4 Elementary School                        | 4     | 21.05  |
| 5 Middle School                            | 4     | 21.05  |
| 8 Two-/Three-Year College/Associate Degree | 3     | 15.79  |
| Total                                      | 19    | 100.00 |

**xchildedu\_11\_:** ZChildName[11]'s Highest Degree (update after CA007)

|                                   | Freq. | %      |
|-----------------------------------|-------|--------|
| 1 No Formal Education(Illiterate) | 1     | 12.50  |
| 2 Did not Finish Primary School   | 1     | 12.50  |
| 4 Elementary School               | 4     | 50.00  |
| 5 Middle School                   | 1     | 12.50  |
| 997 Don't Know                    | 1     | 12.50  |
| Total                             | 8     | 100.00 |

**xchildedu\_12\_:** ZChildName[12]'s Highest Degree (update after CA007)

|                                 | Freq. | %      |
|---------------------------------|-------|--------|
| 2 Did not Finish Primary School | 1     | 33.33  |
| 5 Middle School                 | 2     | 66.67  |
| Total                           | 3     | 100.00 |

**xchildedu\_13\_:** ZChildName[13]'s Highest Degree (update after CA007)

|                     | Freq. | %      |
|---------------------|-------|--------|
| 4 Elementary School | 1     | 100.00 |
| Total               | 1     | 100.00 |

**xchildedu\_14\_:** ZChildName[14]'s Highest Degree (update after CA007)

|                 |
|-----------------|
| No Observations |
|-----------------|

**xchildedu\_15\_:** ZChildName[15]'s Highest Degree (update after CA007)

|                 |
|-----------------|
| No Observations |
|-----------------|

**xchildedu\_16\_:** ZChildName[16]'s Highest Degree (update after CA007)

|                 |
|-----------------|
| No Observations |
|-----------------|

**xchildedu\_17\_:** ZChildName[17]'s Highest Degree (update after CA007)

|                                   | Freq. | %      |
|-----------------------------------|-------|--------|
| 1 No Formal Education(Illiterate) | 1     | 100.00 |
| Total                             | 1     | 100.00 |

**zchildnum:** Number of Children

| Mean | SD   | Min  | Max   | Obs    |
|------|------|------|-------|--------|
| 2.72 | 1.47 | 1.00 | 17.00 | 11,192 |

**zchildbirth\_1\_:** ZChildName[1]'s Birth Year

| Mean     | SD    | Min      | Max      | Obs    |
|----------|-------|----------|----------|--------|
| 1,981.53 | 10.57 | 1,942.00 | 2,015.00 | 10,789 |

**zchildbirth\_2\_:** ZChildName[2]'s Birth Year

| Mean     | SD    | Min      | Max      | Obs   |
|----------|-------|----------|----------|-------|
| 1,981.19 | 11.34 | 1,903.00 | 2,018.00 | 8,879 |

**zchildbirth\_3\_:** ZChildName[3]'s Birth Year

| Mean     | SD    | Min      | Max      | Obs   |
|----------|-------|----------|----------|-------|
| 1,978.10 | 10.65 | 1,900.00 | 2,018.00 | 4,889 |

**zchildbirth\_4\_:** ZChildName[4]'s Birth Year

| Mean     | SD    | Min      | Max      | Obs   |
|----------|-------|----------|----------|-------|
| 1,975.91 | 10.12 | 1,922.00 | 2,018.00 | 2,542 |

**zchildbirth\_5\_:** ZChildName[5]'s Birth Year

| Mean     | SD   | Min      | Max      | Obs   |
|----------|------|----------|----------|-------|
| 1,974.29 | 9.77 | 1,948.00 | 2,015.00 | 1,174 |

**zchildbirth\_6\_:** ZChildName[6]'s Birth Year

| Mean     | SD   | Min      | Max      | Obs |
|----------|------|----------|----------|-----|
| 1,973.91 | 9.45 | 1,947.00 | 2,015.00 | 505 |

**zchildbirth\_7\_:** ZChildName[7]'s Birth Year

| Mean     | SD    | Min      | Max      | Obs |
|----------|-------|----------|----------|-----|
| 1,973.54 | 10.99 | 1,948.00 | 2,015.00 | 230 |

**zchildbirth\_8\_:** ZChildName[8]'s Birth Year

| Mean     | SD    | Min      | Max      | Obs |
|----------|-------|----------|----------|-----|
| 1,974.52 | 12.77 | 1,950.00 | 2,015.00 | 98  |

**zchildbirth\_9\_:** ZChildName[9]'s Birth Year

| Mean     | SD    | Min      | Max      | Obs |
|----------|-------|----------|----------|-----|
| 1,973.63 | 11.05 | 1,955.00 | 2,015.00 | 38  |

**zchildbirth\_10\_:** ZChildName[10]'s Birth Year

| Mean     | SD    | Min      | Max      | Obs |
|----------|-------|----------|----------|-----|
| 1,972.86 | 10.46 | 1,961.00 | 2,015.00 | 21  |

**zchildbirth\_11\_:** ZChildName[11]'s Birth Year

| Mean     | SD   | Min      | Max      | Obs |
|----------|------|----------|----------|-----|
| 1,974.33 | 7.45 | 1,963.00 | 1,986.00 | 9   |

**zchildbirth\_12\_:** ZChildName[12]'s Birth Year

| Mean     | SD   | Min      | Max      | Obs |
|----------|------|----------|----------|-----|
| 1,981.33 | 5.86 | 1,977.00 | 1,988.00 | 3   |

**zchildbirth\_13\_:** ZChildName[13]'s Birth Year

| Mean     | SD | Min      | Max      | Obs |
|----------|----|----------|----------|-----|
| 1,988.00 | .  | 1,988.00 | 1,988.00 | 1   |

**zchildbirth\_14\_:** ZChildName[14]'s Birth Year

|                 |
|-----------------|
| No Observations |
|-----------------|

**zchildbirth\_15\_:** ZChildName[15]'s Birth Year

|                 |
|-----------------|
| No Observations |
|-----------------|

**zchildbirth\_16\_:** ZChildName[16]'s Birth Year

|                 |
|-----------------|
| No Observations |
|-----------------|

**zchildbirth\_17\_:** ZChildName[17]'s Birth Year

| Mean     | SD | Min      | Max      | Obs |
|----------|----|----------|----------|-----|
| 1,981.00 | .  | 1,981.00 | 1,981.00 | 1   |

**zchildgender\_1\_:** ZChildName[1]'s Gender

|          | Freq.  | %      |
|----------|--------|--------|
| 1 Male   | 7,091  | 65.97  |
| 2 Female | 3,658  | 34.03  |
| Total    | 10,749 | 100.00 |

**zchildgender\_2\_:** ZChildName[2]'s Gender

|          | Freq. | %      |
|----------|-------|--------|
| 1 Male   | 4,476 | 50.56  |
| 2 Female | 4,377 | 49.44  |
| Total    | 8,853 | 100.00 |

**zchildgender\_3\_:** ZChildName[3]'s Gender

|          | Freq. | %      |
|----------|-------|--------|
| 1 Male   | 2,036 | 41.76  |
| 2 Female | 2,840 | 58.24  |
| Total    | 4,876 | 100.00 |

**zchildgender\_4\_:** ZChildName[4]'s Gender

|          | Freq. | %      |
|----------|-------|--------|
| 1 Male   | 900   | 35.43  |
| 2 Female | 1,640 | 64.57  |
| Total    | 2,540 | 100.00 |



**zchildgender\_5\_:** ZChildName[5]'s Gender

|          | Freq. | %      |
|----------|-------|--------|
| 1 Male   | 363   | 30.79  |
| 2 Female | 816   | 69.21  |
| Total    | 1,179 | 100.00 |

**zchildgender\_6\_:** ZChildName[6]'s Gender

|          | Freq. | %      |
|----------|-------|--------|
| 1 Male   | 142   | 28.06  |
| 2 Female | 364   | 71.94  |
| Total    | 506   | 100.00 |

**zchildgender\_7\_:** ZChildName[7]'s Gender

|          | Freq. | %      |
|----------|-------|--------|
| 1 Male   | 69    | 30.00  |
| 2 Female | 161   | 70.00  |
| Total    | 230   | 100.00 |

**zchildgender\_8\_:** ZChildName[8]'s Gender

|          | Freq. | %      |
|----------|-------|--------|
| 1 Male   | 27    | 27.27  |
| 2 Female | 72    | 72.73  |
| Total    | 99    | 100.00 |

**zchildgender\_9\_:** ZChildName[9]'s Gender

|          | Freq. | %      |
|----------|-------|--------|
| 1 Male   | 8     | 20.51  |
| 2 Female | 31    | 79.49  |
| Total    | 39    | 100.00 |

**zchildgender\_10\_:** ZChildName[10]'s Gender

|          | Freq. | %      |
|----------|-------|--------|
| 1 Male   | 9     | 42.86  |
| 2 Female | 12    | 57.14  |
| Total    | 21    | 100.00 |

**zchildgender\_11\_:** ZChildName[11]'s Gender

|          | Freq. | %      |
|----------|-------|--------|
| 1 Male   | 2     | 22.22  |
| 2 Female | 7     | 77.78  |
| Total    | 9     | 100.00 |

**zchildgender\_12\_:** ZChildName[12]'s Gender

|          | Freq. | %      |
|----------|-------|--------|
| 1 Male   | 1     | 33.33  |
| 2 Female | 2     | 66.67  |
| Total    | 3     | 100.00 |

**zchildgender\_13\_:** ZChildName[13]'s Gender

|        | Freq. | %      |
|--------|-------|--------|
| 1 Male | 1     | 100.00 |
| Total  | 1     | 100.00 |

**zchildgender\_14\_:** ZChildName[14]'s Gender

|                 |  |  |
|-----------------|--|--|
| No Observations |  |  |
|-----------------|--|--|

**zchildgender\_15\_:** ZChildName[15]'s Gender

|                 |  |  |
|-----------------|--|--|
| No Observations |  |  |
|-----------------|--|--|

**zchildgender\_16\_:** ZChildName[16]'s Gender

|                 |  |  |
|-----------------|--|--|
| No Observations |  |  |
|-----------------|--|--|

**zchildgender\_17\_:** ZChildName[17]'s Gender

|          | Freq. | %      |
|----------|-------|--------|
| 2 Female | 1     | 100.00 |
| Total    | 1     | 100.00 |

**zchildedu\_1\_:** ZChildName[1]'s Highest Degree

|                                            | Freq. | %      |
|--------------------------------------------|-------|--------|
| 1 No Formal Education(Illiterate)          | 263   | 2.64   |
| 2 Did not Finish Primary School            | 802   | 8.04   |
| 4 Elementary School                        | 1,874 | 18.78  |
| 5 Middle School                            | 3,326 | 33.33  |
| 6 High School                              | 1,293 | 12.96  |
| 7 Vocational School                        | 664   | 6.65   |
| 8 Two-/Three-Year College/Associate Degree | 769   | 7.71   |
| 9 Four-Year College/Bachelor's Degree      | 873   | 8.75   |
| 10 Master's Degree                         | 101   | 1.01   |
| 11 Doctoral Degree/Ph.D                    | 14    | 0.14   |
| Total                                      | 9,979 | 100.00 |

**zchildedu\_2\_:** ZChildName[2]'s Highest Degree

|  | Freq. | % |
|--|-------|---|
|--|-------|---|

|                                            |       |        |
|--------------------------------------------|-------|--------|
| 1 No Formal Education(Illiterate)          | 325   | 3.96   |
| 2 Did not Finish Primary School            | 925   | 11.28  |
| 3 Sishu/Home School                        | 1     | 0.01   |
| 4 Elementary School                        | 1,807 | 22.03  |
| 5 Middle School                            | 2,764 | 33.70  |
| 6 High School                              | 786   | 9.58   |
| 7 Vocational School                        | 488   | 5.95   |
| 8 Two-/Three-Year College/Associate Degree | 496   | 6.05   |
| 9 Four-Year College/Bachelor's Degree      | 562   | 6.85   |
| 10 Master's Degree                         | 42    | 0.51   |
| 11 Doctoral Degree/Ph.D                    | 6     | 0.07   |
| Total                                      | 8,202 | 100.00 |

### zchildedu\_3\_: ZChildName[3]'s Highest Degree

|                                            | Freq. | %      |
|--------------------------------------------|-------|--------|
| 1 No Formal Education(Illiterate)          | 294   | 6.51   |
| 2 Did not Finish Primary School            | 599   | 13.27  |
| 4 Elementary School                        | 1,135 | 25.14  |
| 5 Middle School                            | 1,507 | 33.38  |
| 6 High School                              | 371   | 8.22   |
| 7 Vocational School                        | 199   | 4.41   |
| 8 Two-/Three-Year College/Associate Degree | 196   | 4.34   |
| 9 Four-Year College/Bachelor's Degree      | 195   | 4.32   |
| 10 Master's Degree                         | 16    | 0.35   |
| 11 Doctoral Degree/Ph.D                    | 3     | 0.07   |
| Total                                      | 4,515 | 100.00 |

### zchildedu\_4\_: ZChildName[4]'s Highest Degree

|                                            | Freq. | %      |
|--------------------------------------------|-------|--------|
| 1 No Formal Education(Illiterate)          | 199   | 8.64   |
| 2 Did not Finish Primary School            | 380   | 16.50  |
| 4 Elementary School                        | 638   | 27.70  |
| 5 Middle School                            | 690   | 29.96  |
| 6 High School                              | 166   | 7.21   |
| 7 Vocational School                        | 76    | 3.30   |
| 8 Two-/Three-Year College/Associate Degree | 66    | 2.87   |
| 9 Four-Year College/Bachelor's Degree      | 81    | 3.52   |
| 10 Master's Degree                         | 6     | 0.26   |
| 11 Doctoral Degree/Ph.D                    | 1     | 0.04   |
| Total                                      | 2,303 | 100.00 |

### zchildedu\_5\_: ZChildName[5]'s Highest Degree

|                                            | Freq. | %     |
|--------------------------------------------|-------|-------|
| 1 No Formal Education(Illiterate)          | 156   | 14.80 |
| 2 Did not Finish Primary School            | 177   | 16.79 |
| 4 Elementary School                        | 282   | 26.76 |
| 5 Middle School                            | 292   | 27.70 |
| 6 High School                              | 66    | 6.26  |
| 7 Vocational School                        | 34    | 3.23  |
| 8 Two-/Three-Year College/Associate Degree | 15    | 1.42  |
| 9 Four-Year College/Bachelor's Degree      | 28    | 2.66  |
| 10 Master's Degree                         | 3     | 0.28  |

|                         |       |        |
|-------------------------|-------|--------|
| 11 Doctoral Degree/Ph.D | 1     | 0.09   |
| Total                   | 1,054 | 100.00 |

### zchildedu\_6\_: ZChildName[6]'s Highest Degree

|                                            | Freq. | %      |
|--------------------------------------------|-------|--------|
| 1 No Formal Education(Illiterate)          | 70    | 15.45  |
| 2 Did not Finish Primary School            | 91    | 20.09  |
| 3 Sishu/Home School                        | 1     | 0.22   |
| 4 Elementary School                        | 112   | 24.72  |
| 5 Middle School                            | 122   | 26.93  |
| 6 High School                              | 25    | 5.52   |
| 7 Vocational School                        | 10    | 2.21   |
| 8 Two-/Three-Year College/Associate Degree | 8     | 1.77   |
| 9 Four-Year College/Bachelor's Degree      | 13    | 2.87   |
| 10 Master's Degree                         | 1     | 0.22   |
| Total                                      | 453   | 100.00 |

### zchildedu\_7\_: ZChildName[7]'s Highest Degree

|                                            | Freq. | %      |
|--------------------------------------------|-------|--------|
| 1 No Formal Education(Illiterate)          | 41    | 20.92  |
| 2 Did not Finish Primary School            | 41    | 20.92  |
| 4 Elementary School                        | 50    | 25.51  |
| 5 Middle School                            | 38    | 19.39  |
| 6 High School                              | 11    | 5.61   |
| 7 Vocational School                        | 7     | 3.57   |
| 8 Two-/Three-Year College/Associate Degree | 1     | 0.51   |
| 9 Four-Year College/Bachelor's Degree      | 6     | 3.06   |
| 10 Master's Degree                         | 1     | 0.51   |
| Total                                      | 196   | 100.00 |

### zchildedu\_8\_: ZChildName[8]'s Highest Degree

|                                            | Freq. | %      |
|--------------------------------------------|-------|--------|
| 1 No Formal Education(Illiterate)          | 21    | 23.86  |
| 2 Did not Finish Primary School            | 19    | 21.59  |
| 4 Elementary School                        | 19    | 21.59  |
| 5 Middle School                            | 18    | 20.45  |
| 6 High School                              | 5     | 5.68   |
| 7 Vocational School                        | 2     | 2.27   |
| 8 Two-/Three-Year College/Associate Degree | 3     | 3.41   |
| 9 Four-Year College/Bachelor's Degree      | 1     | 1.14   |
| Total                                      | 88    | 100.00 |

### zchildedu\_9\_: ZChildName[9]'s Highest Degree

|                                   | Freq. | %     |
|-----------------------------------|-------|-------|
| 1 No Formal Education(Illiterate) | 7     | 20.59 |
| 2 Did not Finish Primary School   | 8     | 23.53 |
| 4 Elementary School               | 5     | 14.71 |
| 5 Middle School                   | 10    | 29.41 |
| 6 High School                     | 2     | 5.88  |

|                                            |    |        |
|--------------------------------------------|----|--------|
| 8 Two-/Three-Year College/Associate Degree | 2  | 5.88   |
| Total                                      | 34 | 100.00 |

**zchildedu\_10\_:** ZChildName[10]'s Highest Degree

|                                            | Freq. | %      |
|--------------------------------------------|-------|--------|
| 1 No Formal Education(Illiterate)          | 4     | 23.53  |
| 2 Did not Finish Primary School            | 5     | 29.41  |
| 4 Elementary School                        | 4     | 23.53  |
| 5 Middle School                            | 2     | 11.76  |
| 8 Two-/Three-Year College/Associate Degree | 2     | 11.76  |
| Total                                      | 17    | 100.00 |

**zchildedu\_11\_:** ZChildName[11]'s Highest Degree

|                                   | Freq. | %      |
|-----------------------------------|-------|--------|
| 1 No Formal Education(Illiterate) | 1     | 25.00  |
| 2 Did not Finish Primary School   | 1     | 25.00  |
| 4 Elementary School               | 2     | 50.00  |
| Total                             | 4     | 100.00 |

**zchildedu\_12\_:** ZChildName[12]'s Highest Degree

|                                 | Freq. | %      |
|---------------------------------|-------|--------|
| 2 Did not Finish Primary School | 1     | 50.00  |
| 5 Middle School                 | 1     | 50.00  |
| Total                           | 2     | 100.00 |

**versionID:** Version ID

| A String Variable |        |
|-------------------|--------|
| Obs:              | 11,406 |

*This page intentionally left blank*

## MODULE D

### Health Status and Functioning

**ID:** Individual ID

| A String Variable |        |
|-------------------|--------|
| Obs:              | 19,367 |

**householdID:** Household ID

| A String Variable |        |
|-------------------|--------|
| Obs:              | 19,367 |

**communityID:** Community ID

| A String Variable |        |
|-------------------|--------|
| Obs:              | 19,367 |

**proxy:** Proxy

|       | Freq. | %      |
|-------|-------|--------|
| 1 Yes | 1,784 | 100.00 |
| Total | 1,784 | 100.00 |

**proxy\_5:** Proxy for Health Module

|       | Freq. | %      |
|-------|-------|--------|
| 1 Yes | 1,774 | 99.44  |
| 2 No  | 10    | 0.56   |
| Total | 1,784 | 100.00 |

**da001:** Self-Reported Health Status

|  | Freq. | % |
|--|-------|---|
|--|-------|---|

|                |        |        |
|----------------|--------|--------|
| 1 Very Good    | 2,107  | 11.98  |
| 2 Good         | 2,245  | 12.76  |
| 3 Fair         | 8,860  | 50.36  |
| 4 Poor         | 3,194  | 18.16  |
| 5 Very Poor    | 1,170  | 6.65   |
| 997 Don't Know | 16     | 0.09   |
| Total          | 17,592 | 100.00 |

#### da002\_1\_: Doctor Diagnosed Disease [1] Compared to ZIWTime

|                          | Freq. | %      |
|--------------------------|-------|--------|
| 1 Better                 | 1,570 | 23.93  |
| 2 Worse                  | 1,242 | 18.93  |
| 3 Same                   | 3,465 | 52.80  |
| 99 Never Had the Disease | 285   | 4.34   |
| Total                    | 6,562 | 100.00 |

#### da002\_2\_: Doctor Diagnosed Disease [2] Compared to ZIWTime

|                          | Freq. | %      |
|--------------------------|-------|--------|
| 1 Better                 | 735   | 19.74  |
| 2 Worse                  | 757   | 20.33  |
| 3 Same                   | 1,974 | 53.01  |
| 99 Never Had the Disease | 258   | 6.93   |
| Total                    | 3,724 | 100.00 |

#### da002\_3\_: Doctor Diagnosed Disease [3] Compared to ZIWTime

|                          | Freq. | %      |
|--------------------------|-------|--------|
| 1 Better                 | 418   | 19.32  |
| 2 Worse                  | 518   | 23.94  |
| 3 Same                   | 1,018 | 47.04  |
| 99 Never Had the Disease | 210   | 9.70   |
| Total                    | 2,164 | 100.00 |

#### da002\_4\_: Doctor Diagnosed Disease [4] Compared to ZIWTime

|                          | Freq. | %      |
|--------------------------|-------|--------|
| 1 Better                 | 159   | 47.18  |
| 2 Worse                  | 30    | 8.90   |
| 3 Same                   | 88    | 26.11  |
| 99 Never Had the Disease | 60    | 17.80  |
| Total                    | 337   | 100.00 |

#### da002\_5\_: Doctor Diagnosed Disease [5] Compared to ZIWTime

|                          | Freq. | %      |
|--------------------------|-------|--------|
| 1 Better                 | 570   | 25.31  |
| 2 Worse                  | 565   | 25.09  |
| 3 Same                   | 815   | 36.19  |
| 99 Never Had the Disease | 302   | 13.41  |
| Total                    | 2,252 | 100.00 |



**da002\_6\_:** Doctor Diagnosed Disease [6] Compared to ZIWTime

|                          | Freq. | %      |
|--------------------------|-------|--------|
| 1 Better                 | 225   | 19.81  |
| 2 Worse                  | 191   | 16.81  |
| 3 Same                   | 534   | 47.01  |
| 99 Never Had the Disease | 186   | 16.37  |
| Total                    | 1,136 | 100.00 |

**da002\_7\_:** Doctor Diagnosed Disease [7] Compared to ZIWTime

|                          | Freq. | %      |
|--------------------------|-------|--------|
| 1 Better                 | 784   | 24.00  |
| 2 Worse                  | 800   | 24.49  |
| 3 Same                   | 1,415 | 43.31  |
| 99 Never Had the Disease | 268   | 8.20   |
| Total                    | 3,267 | 100.00 |

**da002\_8\_:** Doctor Diagnosed Disease [8] Compared to ZIWTime

|                          | Freq. | %      |
|--------------------------|-------|--------|
| 1 Better                 | 343   | 28.85  |
| 2 Worse                  | 252   | 21.19  |
| 3 Same                   | 370   | 31.12  |
| 99 Never Had the Disease | 224   | 18.84  |
| Total                    | 1,189 | 100.00 |

**da002\_9\_:** Doctor Diagnosed Disease [9] Compared to ZIWTime

|                          | Freq. | %      |
|--------------------------|-------|--------|
| 1 Better                 | 317   | 19.96  |
| 2 Worse                  | 396   | 24.94  |
| 3 Same                   | 658   | 41.44  |
| 99 Never Had the Disease | 217   | 13.66  |
| Total                    | 1,588 | 100.00 |

**da002\_10\_:** Doctor Diagnosed Disease [10] Compared to ZIWTime

|                          | Freq. | %      |
|--------------------------|-------|--------|
| 1 Better                 | 1,419 | 26.76  |
| 2 Worse                  | 1,146 | 21.61  |
| 3 Same                   | 2,413 | 45.50  |
| 99 Never Had the Disease | 325   | 6.13   |
| Total                    | 5,303 | 100.00 |

**da002\_11\_:** Doctor Diagnosed Disease [11] Compared to ZIWTime

|          | Freq. | %     |
|----------|-------|-------|
| 1 Better | 102   | 26.56 |
| 2 Worse  | 112   | 29.17 |
| 3 Same   | 128   | 33.33 |

|                          |     |        |
|--------------------------|-----|--------|
| 99 Never Had the Disease | 42  | 10.94  |
| Total                    | 384 | 100.00 |

#### da002\_12\_: Doctor Diagnosed Disease [12] Compared to ZIWTime

|                          | Freq. | %      |
|--------------------------|-------|--------|
| 2 Worse                  | 4     | 23.53  |
| 3 Same                   | 4     | 23.53  |
| 99 Never Had the Disease | 9     | 52.94  |
| Total                    | 17    | 100.00 |

#### da002\_13\_: Doctor Diagnosed Disease [13] Compared to ZIWTime

|                          | Freq. | %      |
|--------------------------|-------|--------|
| 1 Better                 | 24    | 6.98   |
| 2 Worse                  | 28    | 8.14   |
| 3 Same                   | 39    | 11.34  |
| 99 Never Had the Disease | 253   | 73.55  |
| Total                    | 344   | 100.00 |

#### da002\_14\_: Doctor Diagnosed Disease [14] Compared to ZIWTime

|                          | Freq. | %      |
|--------------------------|-------|--------|
| 1 Better                 | 1,292 | 19.79  |
| 2 Worse                  | 2,393 | 36.65  |
| 3 Same                   | 2,377 | 36.40  |
| 99 Never Had the Disease | 468   | 7.17   |
| Total                    | 6,530 | 100.00 |

#### da002\_15\_: Doctor Diagnosed Disease [15] Compared to ZIWTime

|                          | Freq. | %      |
|--------------------------|-------|--------|
| 1 Better                 | 213   | 24.01  |
| 2 Worse                  | 291   | 32.81  |
| 3 Same                   | 303   | 34.16  |
| 99 Never Had the Disease | 80    | 9.02   |
| Total                    | 887   | 100.00 |

#### da002\_1\_1\_: Self-know Disease [1] Compared to ZIWTime

|                          | Freq. | %      |
|--------------------------|-------|--------|
| 1 Better                 | 21    | 28.77  |
| 2 Worse                  | 3     | 4.11   |
| 3 Same                   | 14    | 19.18  |
| 99 Never Had the Disease | 35    | 47.95  |
| Total                    | 73    | 100.00 |

#### da002\_1\_5\_: Self-know Disease [5] Compared to ZIWTime

|  | Freq. | % |
|--|-------|---|
|--|-------|---|

|                          |     |        |
|--------------------------|-----|--------|
| 1 Better                 | 30  | 19.61  |
| 2 Worse                  | 17  | 11.11  |
| 3 Same                   | 45  | 29.41  |
| 99 Never Had the Disease | 61  | 39.87  |
| Total                    | 153 | 100.00 |

da002\_1\_11\_: Self-know Disease [11] Compared to ZIWTime

|                          | Freq. | %      |
|--------------------------|-------|--------|
| 1 Better                 | 18    | 13.43  |
| 2 Worse                  | 22    | 16.42  |
| 3 Same                   | 38    | 28.36  |
| 99 Never Had the Disease | 56    | 41.79  |
| Total                    | 134   | 100.00 |

da003\_1\_: Diagnosed Disease [1]

|       | Freq.  | %      |
|-------|--------|--------|
| 1 Yes | 1,450  | 11.08  |
| 2 No  | 11,639 | 88.92  |
| Total | 13,089 | 100.00 |

da003\_2\_: Diagnosed Disease [2]

|       | Freq.  | %      |
|-------|--------|--------|
| 1 Yes | 1,637  | 10.30  |
| 2 No  | 14,261 | 89.70  |
| Total | 15,898 | 100.00 |

da003\_3\_: Diagnosed Disease [3]

|       | Freq.  | %      |
|-------|--------|--------|
| 1 Yes | 900    | 5.17   |
| 2 No  | 16,510 | 94.83  |
| Total | 17,410 | 100.00 |

da003\_4\_: Diagnosed Disease [4]

|       | Freq.  | %      |
|-------|--------|--------|
| 1 Yes | 214    | 1.12   |
| 2 No  | 18,873 | 98.88  |
| Total | 19,087 | 100.00 |

da003\_5\_: Diagnosed Disease [5]

|       | Freq.  | %      |
|-------|--------|--------|
| 1 Yes | 809    | 4.65   |
| 2 No  | 16,605 | 95.35  |
| Total | 17,414 | 100.00 |

**da003\_6\_ : Diagnosed Disease [6]**

|       | Freq.  | %      |
|-------|--------|--------|
| 1 Yes | 444    | 2.41   |
| 2 No  | 17,970 | 97.59  |
| Total | 18,414 | 100.00 |

**da003\_7\_ : Diagnosed Disease [7]**

|       | Freq.  | %      |
|-------|--------|--------|
| 1 Yes | 1,017  | 6.21   |
| 2 No  | 15,347 | 93.79  |
| Total | 16,364 | 100.00 |

**da003\_8\_ : Diagnosed Disease [8]**

|       | Freq.  | %      |
|-------|--------|--------|
| 1 Yes | 416    | 2.26   |
| 2 No  | 17,982 | 97.74  |
| Total | 18,398 | 100.00 |

**da003\_9\_ : Diagnosed Disease [9]**

|       | Freq.  | %      |
|-------|--------|--------|
| 1 Yes | 630    | 3.50   |
| 2 No  | 17,362 | 96.50  |
| Total | 17,992 | 100.00 |

**da003\_10\_ : Diagnosed Disease [10]**

|       | Freq.  | %      |
|-------|--------|--------|
| 1 Yes | 1,112  | 7.73   |
| 2 No  | 13,273 | 92.27  |
| Total | 14,385 | 100.00 |

**da003\_11\_ : Diagnosed Disease [11]**

|       | Freq.  | %      |
|-------|--------|--------|
| 1 Yes | 241    | 1.27   |
| 2 No  | 18,780 | 98.73  |
| Total | 19,021 | 100.00 |

**da003\_12\_ : Diagnosed Disease [12]**

|       | Freq.  | %      |
|-------|--------|--------|
| 1 Yes | 799    | 4.13   |
| 2 No  | 18,556 | 95.87  |
| Total | 19,355 | 100.00 |

**da003\_13\_:** Diagnosed Disease [13]

|       | Freq.  | %      |
|-------|--------|--------|
| 1 Yes | 178    | 0.92   |
| 2 No  | 19,094 | 99.08  |
| Total | 19,272 | 100.00 |

**da003\_14\_:** Diagnosed Disease [14]

|       | Freq.  | %      |
|-------|--------|--------|
| 1 Yes | 1,350  | 10.15  |
| 2 No  | 11,951 | 89.85  |
| Total | 13,301 | 100.00 |

**da003\_15\_:** Diagnosed Disease [15]

|       | Freq.  | %      |
|-------|--------|--------|
| 1 Yes | 365    | 1.97   |
| 2 No  | 18,191 | 98.03  |
| Total | 18,556 | 100.00 |

**da004\_1\_:** Self-known Disease [1]

|              | Freq.  | %      |
|--------------|--------|--------|
| 1 Yes        | 172    | 1.48   |
| 2 No         | 10,011 | 86.29  |
| 3 Don't Know | 1,418  | 12.22  |
| Total        | 11,601 | 100.00 |

**da004\_5\_:** Self-known Disease [5]

|              | Freq.  | %      |
|--------------|--------|--------|
| 1 Yes        | 286    | 1.73   |
| 2 No         | 13,216 | 80.03  |
| 3 Don't Know | 3,011  | 18.23  |
| Total        | 16,513 | 100.00 |

**da004\_11\_:** Self-known Disease [11]

|              | Freq.  | %      |
|--------------|--------|--------|
| 1 Yes        | 312    | 1.67   |
| 2 No         | 14,785 | 79.06  |
| 3 Don't Know | 3,605  | 19.28  |
| Total        | 18,702 | 100.00 |

**da005:** Out-patient Service

|       | Freq.  | %     |
|-------|--------|-------|
| 1 Yes | 3,966  | 20.48 |
| 2 No  | 15,396 | 79.52 |

|       |        |        |
|-------|--------|--------|
| Total | 19,362 | 100.00 |
|-------|--------|--------|

**da006: Out-patient Service Times**

| Mean | SD   | Min  | Max   | Obs   |
|------|------|------|-------|-------|
| 2.23 | 2.56 | 0.00 | 31.00 | 3,966 |

**da007: In-patient Service**

|       | Freq.  | %      |
|-------|--------|--------|
| 1 Yes | 3,736  | 19.30  |
| 2 No  | 15,625 | 80.70  |
| Total | 19,361 | 100.00 |

**da008: In-patient Service Times**

| Mean | SD   | Min  | Max   | Obs   |
|------|------|------|-------|-------|
| 1.71 | 2.09 | 1.00 | 84.00 | 3,736 |

**da009: Delayed Medical Service**

|       | Freq.  | %      |
|-------|--------|--------|
| 1 Yes | 2,184  | 11.28  |
| 2 No  | 17,177 | 88.72  |
| Total | 19,361 | 100.00 |

**da010\_s1: Delayed Medical Service 1: In-patient Service, Big Surgery**

|       | Freq. | %      |
|-------|-------|--------|
| 0 No  | 2,080 | 95.24  |
| 1 Yes | 104   | 4.76   |
| Total | 2,184 | 100.00 |

**da010\_s2: Delayed Medical Service 1: Out-patient Service, Small Surgery**

|       | Freq. | %      |
|-------|-------|--------|
| 0 No  | 2,106 | 96.43  |
| 2 Yes | 78    | 3.57   |
| Total | 2,184 | 100.00 |

**da010\_s3: Delayed Medical Service 1: Out-patient Service**

|       | Freq. | %      |
|-------|-------|--------|
| 0 No  | 1,054 | 48.26  |
| 3 Yes | 1,130 | 51.74  |
| Total | 2,184 | 100.00 |

**da010\_s4: Delayed Medical Service 1: Prescription for medicine**

|       | Freq. | %      |
|-------|-------|--------|
| 0 No  | 1,658 | 75.92  |
| 4 Yes | 526   | 24.08  |
| Total | 2,184 | 100.00 |

**da010\_s5: Delayed Medical Service 1: Dental care**

|       | Freq. | %      |
|-------|-------|--------|
| 0 No  | 1,522 | 69.69  |
| 5 Yes | 662   | 30.31  |
| Total | 2,184 | 100.00 |

**da010\_s6: Delayed Medical Service 1: Others, Please Specify**

|       | Freq. | %      |
|-------|-------|--------|
| 0 No  | 1,909 | 87.41  |
| 6 Yes | 275   | 12.59  |
| Total | 2,184 | 100.00 |

**da011\_s1: Reason for Out-patient Service: New Symptoms**

|       | Freq. | %      |
|-------|-------|--------|
| 0 No  | 840   | 74.34  |
| 1 Yes | 290   | 25.66  |
| Total | 1,130 | 100.00 |

**da011\_s2: Reason for Out-patient Service: Prevalent Disease**

|       | Freq. | %      |
|-------|-------|--------|
| 0 No  | 341   | 30.18  |
| 2 Yes | 789   | 69.82  |
| Total | 1,130 | 100.00 |

**da011\_s3: Reason for Out-patient Service: Regular Physical Examination**

|       | Freq. | %      |
|-------|-------|--------|
| 0 No  | 1,014 | 89.73  |
| 3 Yes | 116   | 10.27  |
| Total | 1,130 | 100.00 |

**da012\_s1: Reason for Delayed: Unavailable for Appointment**

|       | Freq. | %      |
|-------|-------|--------|
| 0 No  | 1,780 | 81.50  |
| 1 Yes | 404   | 18.50  |
| Total | 2,184 | 100.00 |

**da012\_s2: Reason for Delayed: Change Schedule of Hospital**

|       | Freq. | %      |
|-------|-------|--------|
| 0 No  | 2,042 | 93.50  |
| 2 Yes | 142   | 6.50   |
| Total | 2,184 | 100.00 |

**da012\_s3: Reason for Delayed: I decided to Visit Later**

|       | Freq. | %      |
|-------|-------|--------|
| 0 No  | 1,630 | 74.63  |
| 3 Yes | 554   | 25.37  |
| Total | 2,184 | 100.00 |

**da012\_s4: Reason for Delayed: I am Afraid to go to Hospital**

|       | Freq. | %      |
|-------|-------|--------|
| 0 No  | 1,591 | 72.85  |
| 4 Yes | 593   | 27.15  |
| Total | 2,184 | 100.00 |

**da012\_s5: Reason for Delayed: Others, Please Specify**

|       | Freq. | %      |
|-------|-------|--------|
| 0 No  | 1,282 | 58.70  |
| 5 Yes | 902   | 41.30  |
| Total | 2,184 | 100.00 |

**da013: RIW: Time for the Latest Physical Examination**

|                                         | Freq.  | %      |
|-----------------------------------------|--------|--------|
| 1 Year and Month                        | 9,052  | 47.07  |
| 2 No Physical Examination Since ZIWTime | 10,178 | 52.93  |
| Total                                   | 19,230 | 100.00 |

**da013\_1: Year**

| Mean     | SD   | Min      | Max      | Obs   |
|----------|------|----------|----------|-------|
| 2,019.49 | 0.65 | 2,008.00 | 2,020.00 | 9,052 |

**da013\_2: Month**

| Mean | SD   | Min   | Max   | Obs   |
|------|------|-------|-------|-------|
| 5.18 | 3.24 | -1.00 | 12.00 | 9,052 |

**da014: NIW: Time for the Latest Physical Examination**

|                  | Freq. | %     |
|------------------|-------|-------|
| 1 Year and Month | 67    | 51.54 |



|                                    |     |        |
|------------------------------------|-----|--------|
| 2 No Physical Examination Lifetime | 63  | 48.46  |
| Total                              | 130 | 100.00 |

**da014\_1: Year**

| Mean     | SD   | Min      | Max      | Obs |
|----------|------|----------|----------|-----|
| 2,018.63 | 3.96 | 1,988.00 | 2,020.00 | 67  |

**da014\_2: Month**

| Mean | SD   | Min   | Max   | Obs |
|------|------|-------|-------|-----|
| 5.16 | 3.30 | -1.00 | 12.00 | 67  |

**da019: RIW: Traffic Accident/Injury and Received Medical Treatment Since ZIW-Time**

|       | Freq.  | %      |
|-------|--------|--------|
| 1 Yes | 517    | 2.69   |
| 2 No  | 18,713 | 97.31  |
| Total | 19,230 | 100.00 |

**da020: NIW: Traffic Accident/Injury and Received Medical Treatment**

|       | Freq. | %      |
|-------|-------|--------|
| 1 Yes | 15    | 11.54  |
| 2 No  | 115   | 88.46  |
| Total | 130   | 100.00 |

**da021: Traffic Accident/Injury Limit Daily Activities**

|       | Freq. | %      |
|-------|-------|--------|
| 1 Yes | 279   | 52.44  |
| 2 No  | 253   | 47.56  |
| Total | 532   | 100.00 |

**da022: Fallen Down since ZIWTime**

|       | Freq.  | %      |
|-------|--------|--------|
| 1 Yes | 3,315  | 17.24  |
| 2 No  | 15,915 | 82.76  |
| Total | 19,230 | 100.00 |

**da023: Fallen Down**

|       | Freq. | %      |
|-------|-------|--------|
| 1 Yes | 40    | 30.77  |
| 2 No  | 90    | 69.23  |
| Total | 130   | 100.00 |

**da024: Times Fallen Down Needing Medical Treatment**

| Mean | SD   | Min  | Max   | Obs   |
|------|------|------|-------|-------|
| 0.54 | 0.93 | 0.00 | 15.00 | 3,355 |

**da025: Fractured Hip since ZIWTime**

|       | Freq.  | %      |
|-------|--------|--------|
| 1 Yes | 164    | 0.85   |
| 2 No  | 19,066 | 99.15  |
| Total | 19,230 | 100.00 |

**da026: Fractured Hip**

|       | Freq. | %      |
|-------|-------|--------|
| 1 Yes | 3     | 2.31   |
| 2 No  | 127   | 97.69  |
| Total | 130   | 100.00 |

**da027: Troubled with Body Pain**

|               | Freq.  | %      |
|---------------|--------|--------|
| 1 None        | 8,132  | 42.01  |
| 2 A little    | 5,697  | 29.43  |
| 3 Somewhat    | 1,993  | 10.30  |
| 4 Quite a Bit | 1,729  | 8.93   |
| 5 Very        | 1,806  | 9.33   |
| Total         | 19,357 | 100.00 |

**da028\_s1: Body Parts Feeling Pain**

|                   | Freq.  | %      |
|-------------------|--------|--------|
| 0 No              | 7,216  | 64.29  |
| 1 Head (Headache) | 4,008  | 35.71  |
| Total             | 11,224 | 100.00 |

**da028\_s2: Body Parts Feeling Pain**

|            | Freq.  | %      |
|------------|--------|--------|
| 0 No       | 7,222  | 64.34  |
| 2 Shoulder | 4,002  | 35.66  |
| Total      | 11,224 | 100.00 |

**da028\_s3: Body Parts Feeling Pain**

|       | Freq.  | %      |
|-------|--------|--------|
| 0 No  | 8,151  | 72.62  |
| 3 Arm | 3,073  | 27.38  |
| Total | 11,224 | 100.00 |

**da028\_s4: Body Parts Feeling Pain**

|         | Freq.  | %      |
|---------|--------|--------|
| 0 No    | 9,222  | 82.16  |
| 4 Wrist | 2,002  | 17.84  |
| Total   | 11,224 | 100.00 |

**da028\_s5: Body Parts Feeling Pain**

|           | Freq.  | %      |
|-----------|--------|--------|
| 0 No      | 8,921  | 79.48  |
| 5 Fingers | 2,303  | 20.52  |
| Total     | 11,224 | 100.00 |

**da028\_s6: Body Parts Feeling Pain**

|         | Freq.  | %      |
|---------|--------|--------|
| 0 No    | 9,559  | 85.17  |
| 6 Chest | 1,665  | 14.83  |
| Total   | 11,224 | 100.00 |

**da028\_s7: Body Parts Feeling Pain**

|                         | Freq.  | %      |
|-------------------------|--------|--------|
| 0 No                    | 8,500  | 75.73  |
| 7 Stomach (Stomachache) | 2,724  | 24.27  |
| Total                   | 11,224 | 100.00 |

**da028\_s8: Body Parts Feeling Pain**

|        | Freq.  | %      |
|--------|--------|--------|
| 0 No   | 8,505  | 75.78  |
| 8 Back | 2,719  | 24.22  |
| Total  | 11,224 | 100.00 |

**da028\_s9: Body Parts Feeling Pain**

|         | Freq.  | %      |
|---------|--------|--------|
| 0 No    | 4,938  | 44.00  |
| 9 Waist | 6,286  | 56.00  |
| Total   | 11,224 | 100.00 |

**da028\_s10: Body Parts Feeling Pain**

|             | Freq.  | %      |
|-------------|--------|--------|
| 0 No        | 9,658  | 86.05  |
| 10 Buttocks | 1,566  | 13.95  |
| Total       | 11,224 | 100.00 |

**da028\_s11: Body Parts Feeling Pain**

|        | Freq.  | %      |
|--------|--------|--------|
| 0 No   | 6,688  | 59.59  |
| 11 Leg | 4,536  | 40.41  |
| Total  | 11,224 | 100.00 |

**da028\_s12: Body Parts Feeling Pain**

|          | Freq.  | %      |
|----------|--------|--------|
| 0 No     | 6,309  | 56.21  |
| 12 Knees | 4,915  | 43.79  |
| Total    | 11,224 | 100.00 |

**da028\_s13: Body Parts Feeling Pain**

|          | Freq.  | %      |
|----------|--------|--------|
| 0 No     | 9,080  | 80.90  |
| 13 Ankle | 2,144  | 19.10  |
| Total    | 11,224 | 100.00 |

**da028\_s14: Body Parts Feeling Pain**

|         | Freq.  | %      |
|---------|--------|--------|
| 0 No    | 9,826  | 87.54  |
| 14 Toes | 1,398  | 12.46  |
| Total   | 11,224 | 100.00 |

**da028\_s15: Body Parts Feeling Pain**

|         | Freq.  | %      |
|---------|--------|--------|
| 0 No    | 8,387  | 74.72  |
| 15 Neck | 2,837  | 25.28  |
| Total   | 11,224 | 100.00 |

**da028\_s16: Body Parts Feeling Pain**

|                          | Freq.  | %      |
|--------------------------|--------|--------|
| 0 No                     | 9,661  | 86.07  |
| 16 Other, Please Specify | 1,563  | 13.93  |
| Total                    | 11,224 | 100.00 |

**da029: Life Expectancy**

|                     | Freq. | %     |
|---------------------|-------|-------|
| 1 Almost Impossible | 2,056 | 11.64 |
| 2 Not Very Likely   | 2,175 | 12.31 |
| 3 Maybe             | 6,066 | 34.34 |
| 4 Very Likely       | 1,944 | 11.01 |
| 5 Almost Certain    | 2,563 | 14.51 |

|                |        |        |
|----------------|--------|--------|
| 997 Don't Know | 2,858  | 16.18  |
| Total          | 17,662 | 100.00 |

**da030: During Last Month Average Hours of Actual Sleep**

| Mean | SD   | Min   | Max   | Obs    |
|------|------|-------|-------|--------|
| 5.96 | 2.14 | -1.00 | 24.00 | 19,355 |

**da031: During Last Month Time for a Nap after Lunch**

| Mean  | SD    | Min   | Max    | Obs    |
|-------|-------|-------|--------|--------|
| 42.20 | 45.73 | -1.00 | 300.00 | 19,355 |

**da032\_1\_: Intensive Physical Activity More than 10 Mins Each Time**

|       | Freq.  | %      |
|-------|--------|--------|
| 1 Yes | 6,886  | 35.58  |
| 2 No  | 12,467 | 64.42  |
| Total | 19,353 | 100.00 |

**da032\_2\_: Moderate Physical Activity More than 10 Mins Each Time**

|       | Freq.  | %      |
|-------|--------|--------|
| 1 Yes | 10,759 | 55.59  |
| 2 No  | 8,594  | 44.41  |
| Total | 19,353 | 100.00 |

**da032\_3\_: Light Physical Activity More than 10 Mins Each Time**

|       | Freq.  | %      |
|-------|--------|--------|
| 1 Yes | 14,879 | 76.89  |
| 2 No  | 4,472  | 23.11  |
| Total | 19,351 | 100.00 |

**da033\_1\_: Days with Intensive Physical Activity**

| Mean | SD   | Min  | Max  | Obs   |
|------|------|------|------|-------|
| 4.83 | 2.17 | 1.00 | 7.00 | 6,886 |

**da033\_2\_: Days with Moderate Physical Activity**

| Mean | SD   | Min  | Max  | Obs    |
|------|------|------|------|--------|
| 5.14 | 2.17 | 1.00 | 7.00 | 10,759 |

**da033\_3\_: Days with Light Physical Activity**

| Mean | SD | Min | Max | Obs |
|------|----|-----|-----|-----|
|------|----|-----|-----|-----|

|      |      |      |      |        |
|------|------|------|------|--------|
| 5.94 | 1.75 | 1.00 | 7.00 | 14,879 |
|------|------|------|------|--------|

**da034\_1\_:** Time with Intensive Physical Activity

|             | Freq. | %      |
|-------------|-------|--------|
| 1 <2 Hours  | 1,826 | 26.52  |
| 2 >=2 Hours | 5,060 | 73.48  |
| Total       | 6,886 | 100.00 |

**da034\_2\_:** Time with Moderate Physical Activity

|             | Freq.  | %      |
|-------------|--------|--------|
| 1 <2 Hours  | 6,205  | 57.67  |
| 2 >=2 Hours | 4,554  | 42.33  |
| Total       | 10,759 | 100.00 |

**da034\_3\_:** Time with Light Physical Activity

|             | Freq.  | %      |
|-------------|--------|--------|
| 1 <2 Hours  | 9,515  | 63.95  |
| 2 >=2 Hours | 5,364  | 36.05  |
| Total       | 14,879 | 100.00 |

**da035\_1\_:** Time with Intensive Physical Activity

|                | Freq. | %      |
|----------------|-------|--------|
| 1 <30 Minutes  | 332   | 18.18  |
| 2 >=30 Minutes | 1,494 | 81.82  |
| Total          | 1,826 | 100.00 |

**da035\_2\_:** Time with Moderate Physical Activity

|                | Freq. | %      |
|----------------|-------|--------|
| 1 <30 Minutes  | 1,582 | 25.50  |
| 2 >=30 Minutes | 4,623 | 74.50  |
| Total          | 6,205 | 100.00 |

**da035\_3\_:** Time with Light Physical Activity

|                | Freq. | %      |
|----------------|-------|--------|
| 1 <30 Minutes  | 1,814 | 19.06  |
| 2 >=30 Minutes | 7,701 | 80.94  |
| Total          | 9,515 | 100.00 |

**da036\_1\_:** Time with Intensive Physical Activity

|             | Freq. | %     |
|-------------|-------|-------|
| 1 <4 Hours  | 1,775 | 35.08 |
| 2 >=4 Hours | 3,285 | 64.92 |

|       |       |        |
|-------|-------|--------|
| Total | 5,060 | 100.00 |
|-------|-------|--------|

**da036\_2\_:** Time with Moderate Physical Activity

|             | Freq. | %      |
|-------------|-------|--------|
| 1 <4 Hours  | 2,540 | 55.79  |
| 2 >=4 Hours | 2,013 | 44.21  |
| Total       | 4,553 | 100.00 |

**da036\_3\_:** Time with Light Physical Activity

|             | Freq. | %      |
|-------------|-------|--------|
| 1 <4 Hours  | 3,376 | 62.94  |
| 2 >=4 Hours | 1,988 | 37.06  |
| Total       | 5,364 | 100.00 |

**da037\_1\_:** Purpose for Intensive Physical Activity

|                          | Freq. | %      |
|--------------------------|-------|--------|
| 1 Job Demands            | 5,032 | 73.08  |
| 2 Entertainment          | 165   | 2.40   |
| 3 Exercise               | 1,153 | 16.74  |
| 4 Others, Please Specify | 536   | 7.78   |
| Total                    | 6,886 | 100.00 |

**da037\_2\_:** Purpose for Moderate Physical Activity

|                          | Freq.  | %      |
|--------------------------|--------|--------|
| 1 Job Demands            | 4,867  | 45.24  |
| 2 Entertainment          | 377    | 3.50   |
| 3 Exercise               | 2,408  | 22.38  |
| 4 Others, Please Specify | 3,107  | 28.88  |
| Total                    | 10,759 | 100.00 |

**da037\_3\_:** Purpose for Light Physical Activity

|                          | Freq.  | %      |
|--------------------------|--------|--------|
| 1 Job Demands            | 4,420  | 29.71  |
| 2 Entertainment          | 1,588  | 10.67  |
| 3 Exercise               | 7,476  | 50.25  |
| 4 Others, Please Specify | 1,395  | 9.38   |
| Total                    | 14,879 | 100.00 |

**da038\_s1:** Activities in Last Month

|                           | Freq.  | %      |
|---------------------------|--------|--------|
| 0 No                      | 13,165 | 68.03  |
| 1 Interacted With Friends | 6,186  | 31.97  |
| Total                     | 19,351 | 100.00 |

**da038\_s2: Activities in Last Month**

|                                                                         | Freq.  | %      |
|-------------------------------------------------------------------------|--------|--------|
| 0 No                                                                    | 16,517 | 85.35  |
| 2 Played Ma-jong, Played Chess, Played Cards, or Went to Community Club | 2,834  | 14.65  |
| Total                                                                   | 19,351 | 100.00 |

**da038\_s3: Activities in Last Month**

|                                                                           | Freq.  | %      |
|---------------------------------------------------------------------------|--------|--------|
| 0 No                                                                      | 16,362 | 84.55  |
| 3 Provided Help to Family, Friends, or Neighbors Who Do Not Live With You | 2,989  | 15.45  |
| Total                                                                     | 19,351 | 100.00 |

**da038\_s4: Activities in Last Month**

|                                                  | Freq.  | %      |
|--------------------------------------------------|--------|--------|
| 0 No                                             | 18,023 | 93.14  |
| 4 Went to a Sport, Social, or Other Kind of Club | 1,328  | 6.86   |
| Total                                            | 19,351 | 100.00 |

**da038\_s5: Activities in Last Month**

|                                                 | Freq.  | %      |
|-------------------------------------------------|--------|--------|
| 0 No                                            | 18,891 | 97.62  |
| 5 Took Part in a Community-Related Organization | 460    | 2.38   |
| Total                                           | 19,351 | 100.00 |

**da038\_s6: Activities in Last Month**

|                                                                                                    | Freq.  | %      |
|----------------------------------------------------------------------------------------------------|--------|--------|
| 0 No                                                                                               | 18,743 | 96.86  |
| 6 Done Voluntary or Charity work, or Cared for a Sick or Disabled Adult Who Does Not Live With You | 608    | 3.14   |
| Total                                                                                              | 19,351 | 100.00 |

**da038\_s7: Activities in Last Month**

|                                              | Freq.  | %      |
|----------------------------------------------|--------|--------|
| 0 No                                         | 19,044 | 98.41  |
| 7 Attended an Educational or Training Course | 307    | 1.59   |
| Total                                        | 19,351 | 100.00 |

**da038\_s8: Activities in Last Month**

|                          | Freq.  | %     |
|--------------------------|--------|-------|
| 0 No                     | 18,988 | 98.12 |
| 8 Others, Please Specify | 363    | 1.88  |



|       |        |        |
|-------|--------|--------|
| Total | 19,351 | 100.00 |
|-------|--------|--------|

**da038\_s9: Activities in Last Month**

|                 | Freq.  | %      |
|-----------------|--------|--------|
| 0 No            | 9,296  | 48.04  |
| 9 None of These | 10,055 | 51.96  |
| Total           | 19,351 | 100.00 |

**da039\_1\_: Frequency of Activities[1]**

|                     | Freq. | %      |
|---------------------|-------|--------|
| 1 Almost Daily      | 1,900 | 30.71  |
| 2 Almost Every Week | 1,348 | 21.79  |
| 3 Not Regularly     | 2,938 | 47.49  |
| Total               | 6,186 | 100.00 |

**da039\_2\_: Frequency of Activities[2]**

|                     | Freq. | %      |
|---------------------|-------|--------|
| 1 Almost Daily      | 715   | 25.23  |
| 2 Almost Every Week | 829   | 29.25  |
| 3 Not Regularly     | 1,290 | 45.52  |
| Total               | 2,834 | 100.00 |

**da039\_3\_: Frequency of Activities[3]**

|                     | Freq. | %      |
|---------------------|-------|--------|
| 1 Almost Daily      | 216   | 7.23   |
| 2 Almost Every Week | 522   | 17.46  |
| 3 Not Regularly     | 2,251 | 75.31  |
| Total               | 2,989 | 100.00 |

**da039\_4\_: Frequency of Activities[4]**

|                     | Freq. | %      |
|---------------------|-------|--------|
| 1 Almost Daily      | 782   | 58.89  |
| 2 Almost Every Week | 242   | 18.22  |
| 3 Not Regularly     | 304   | 22.89  |
| Total               | 1,328 | 100.00 |

**da039\_5\_: Frequency of Activities[5]**

|                     | Freq. | %      |
|---------------------|-------|--------|
| 1 Almost Daily      | 30    | 6.52   |
| 2 Almost Every Week | 105   | 22.83  |
| 3 Not Regularly     | 325   | 70.65  |
| Total               | 460   | 100.00 |

**da039\_6\_:** Frequency of Activities[6]

|                     | Freq. | %      |
|---------------------|-------|--------|
| 1 Almost Daily      | 62    | 10.20  |
| 2 Almost Every Week | 109   | 17.93  |
| 3 Not Regularly     | 437   | 71.88  |
| Total               | 608   | 100.00 |

**da039\_7\_:** Frequency of Activities[7]

|                     | Freq. | %      |
|---------------------|-------|--------|
| 1 Almost Daily      | 31    | 10.10  |
| 2 Almost Every Week | 54    | 17.59  |
| 3 Not Regularly     | 222   | 72.31  |
| Total               | 307   | 100.00 |

**da039\_8\_:** Frequency of Activities[8]

|                     | Freq. | %      |
|---------------------|-------|--------|
| 1 Almost Daily      | 80    | 22.04  |
| 2 Almost Every Week | 109   | 30.03  |
| 3 Not Regularly     | 174   | 47.93  |
| Total               | 363   | 100.00 |

**da040:** Used the Internet

|       | Freq.  | %      |
|-------|--------|--------|
| 1 Yes | 7,869  | 40.67  |
| 2 No  | 11,480 | 59.33  |
| Total | 19,349 | 100.00 |

**da041\_s1:** Devices to Use Internet: Desktop Computer

|       | Freq. | %      |
|-------|-------|--------|
| 0 No  | 7,299 | 92.76  |
| 1 Yes | 570   | 7.24   |
| Total | 7,869 | 100.00 |

**da041\_s2:** Devices to Use Internet: Laptop Computer

|       | Freq. | %      |
|-------|-------|--------|
| 0 No  | 7,668 | 97.45  |
| 2 Yes | 201   | 2.55   |
| Total | 7,869 | 100.00 |

**da041\_s3:** Devices to Use Internet: Tablet Computer

|      | Freq. | %     |
|------|-------|-------|
| 0 No | 7,642 | 97.12 |

|       |       |        |
|-------|-------|--------|
| 3 Yes | 227   | 2.88   |
| Total | 7,869 | 100.00 |

**da041\_s4: Devices to Use Internet: Cellphone**

|       | Freq. | %      |
|-------|-------|--------|
| 0 No  | 69    | 0.88   |
| 4 Yes | 7,800 | 99.12  |
| Total | 7,869 | 100.00 |

**da041\_s5: Devices to Use Internet: Others, Please Specify**

|       | Freq. | %      |
|-------|-------|--------|
| 0 No  | 7,837 | 99.59  |
| 5 Yes | 32    | 0.41   |
| Total | 7,869 | 100.00 |

**da042\_s1: Activities with Internet: Chatting**

|       | Freq. | %      |
|-------|-------|--------|
| 0 No  | 3,173 | 40.32  |
| 1 Yes | 4,696 | 59.68  |
| Total | 7,869 | 100.00 |

**da042\_s2: Activities with Internet: Reading News**

|       | Freq. | %      |
|-------|-------|--------|
| 0 No  | 2,392 | 30.40  |
| 2 Yes | 5,477 | 69.60  |
| Total | 7,869 | 100.00 |

**da042\_s3: Activities with Internet: Watching Videos**

|       | Freq. | %      |
|-------|-------|--------|
| 0 No  | 2,010 | 25.54  |
| 3 Yes | 5,859 | 74.46  |
| Total | 7,869 | 100.00 |

**da042\_s4: Activities with Internet: Playing Games**

|       | Freq. | %      |
|-------|-------|--------|
| 0 No  | 6,924 | 87.99  |
| 4 Yes | 945   | 12.01  |
| Total | 7,869 | 100.00 |

**da042\_s5: Activities with Internet: Money Management**

|      | Freq. | %     |
|------|-------|-------|
| 0 No | 7,575 | 96.26 |

|       |       |        |
|-------|-------|--------|
| 5 Yes | 294   | 3.74   |
| Total | 7,869 | 100.00 |

**da042\_s6: Activities with Internet: Others, Please Specify**

|       | Freq. | %      |
|-------|-------|--------|
| 0 No  | 6,845 | 86.99  |
| 6 Yes | 1,024 | 13.01  |
| Total | 7,869 | 100.00 |

**da043: Payment with Mobile Phone**

|       | Freq. | %      |
|-------|-------|--------|
| 1 Yes | 4,922 | 62.55  |
| 2 No  | 2,947 | 37.45  |
| Total | 7,869 | 100.00 |

**da044: Use Wechat**

|       | Freq. | %      |
|-------|-------|--------|
| 1 Yes | 7,174 | 91.17  |
| 2 No  | 695   | 8.83   |
| Total | 7,869 | 100.00 |

**da045: Use Wechat Moments**

|       | Freq. | %      |
|-------|-------|--------|
| 1 Yes | 4,208 | 58.66  |
| 2 No  | 2,966 | 41.34  |
| Total | 7,174 | 100.00 |

**da046: Ever Smoked**

|       | Freq.  | %      |
|-------|--------|--------|
| 1 Yes | 423    | 3.62   |
| 2 No  | 11,274 | 96.38  |
| Total | 11,697 | 100.00 |

**da047: Still Smoke or already Quit**

|                | Freq. | %      |
|----------------|-------|--------|
| 1 Still smoke  | 4,911 | 60.82  |
| 2 Quit         | 2,565 | 31.76  |
| 3 Never Smoked | 599   | 7.42   |
| Total          | 8,075 | 100.00 |

**da048: Products Normally Use**

|  | Freq. | % |
|--|-------|---|
|--|-------|---|

|                                  |       |        |
|----------------------------------|-------|--------|
| 1 Smoking a Pipe                 | 414   | 5.54   |
| 2 Smoking Self-Rolled Cigarettes | 670   | 8.96   |
| 3 Filtered Cigarette             | 5,674 | 75.90  |
| 4 Unfiltered Cigarette           | 453   | 6.06   |
| 5 Cigar                          | 2     | 0.03   |
| 6 Water Cigarettes               | 263   | 3.52   |
| Total                            | 7,476 | 100.00 |

**da049: Time Totally Quit Smoking**

|        | Freq. | %      |
|--------|-------|--------|
| 1 Age  | 702   | 27.37  |
| 2 Year | 1,863 | 72.63  |
| Total  | 2,565 | 100.00 |

**da049\_1: Age**

| Mean  | SD    | Min   | Max   | Obs |
|-------|-------|-------|-------|-----|
| 45.59 | 19.67 | -1.00 | 88.00 | 702 |

**da049\_2: Year**

| Mean     | SD     | Min   | Max      | Obs   |
|----------|--------|-------|----------|-------|
| 1,967.83 | 291.88 | -1.00 | 2,020.00 | 1,863 |

**da050\_1: Current Cigarettes in One Day**

| Mean  | SD    | Min  | Max    | Obs   |
|-------|-------|------|--------|-------|
| 16.57 | 11.27 | 0.00 | 100.00 | 4,911 |

**da050\_2: Cigarettes in One Day Before Quit**

| Mean  | SD    | Min   | Max    | Obs   |
|-------|-------|-------|--------|-------|
| 20.46 | 16.89 | -1.00 | 100.00 | 2,565 |

**da051: Frequency Drank Alcoholic Beverages in the Past Year**

|                                    | Freq.  | %      |
|------------------------------------|--------|--------|
| 1 Drink More than Once a Month     | 5,093  | 26.32  |
| 2 Drink But Less than Once a Month | 1,835  | 9.48   |
| 3 None of These                    | 12,421 | 64.19  |
| Total                              | 19,349 | 100.00 |

**da052: Frequency Drinking Per Month in the Last Year**

|                              | Freq. | %     |
|------------------------------|-------|-------|
| 1 Once a Month               | 415   | 8.15  |
| 2 Two or Three Times a Month | 972   | 19.09 |
| 3 Once a Week                | 506   | 9.94  |

|                             |       |        |
|-----------------------------|-------|--------|
| 4 Two or Three Times a Week | 693   | 13.61  |
| 5 Four to six times a Week  | 230   | 4.52   |
| 6 Once a Day                | 1,308 | 25.68  |
| 7 Twice a Day               | 748   | 14.69  |
| 8 More than Twice a Day     | 221   | 4.34   |
| Total                       | 5,093 | 100.00 |

**db001: Difficulty with Dressing**

|                                       | Freq.  | %      |
|---------------------------------------|--------|--------|
| 1 Don't Have Any Difficulty           | 17,791 | 91.95  |
| 2 Have Difficulty But Can Still Do It | 959    | 4.96   |
| 3 Have Difficulty and Need Help       | 428    | 2.21   |
| 4 Can Not Do It                       | 171    | 0.88   |
| Total                                 | 19,349 | 100.00 |

**db002: Anyone Ever Helped**

|       | Freq. | %      |
|-------|-------|--------|
| 1 Yes | 738   | 47.37  |
| 2 No  | 820   | 52.63  |
| Total | 1,558 | 100.00 |

**db003: Difficulty with Bathing or Showering**

|                                       | Freq.  | %      |
|---------------------------------------|--------|--------|
| 1 Don't Have Any Difficulty           | 17,633 | 91.13  |
| 2 Have Difficulty But Can Still Do It | 729    | 3.77   |
| 3 Have Difficulty and Need Help       | 724    | 3.74   |
| 4 Can Not Do It                       | 263    | 1.36   |
| Total                                 | 19,349 | 100.00 |

**db004: Anyone Ever Helped**

|       | Freq. | %      |
|-------|-------|--------|
| 1 Yes | 1,017 | 59.27  |
| 2 No  | 699   | 40.73  |
| Total | 1,716 | 100.00 |

**db005: Difficulty with Eating**

|                                       | Freq.  | %      |
|---------------------------------------|--------|--------|
| 1 Don't Have Any Difficulty           | 18,645 | 96.36  |
| 2 Have Difficulty But Can Still Do It | 413    | 2.13   |
| 3 Have Difficulty and Need Help       | 177    | 0.91   |
| 4 Can Not Do It                       | 114    | 0.59   |
| Total                                 | 19,349 | 100.00 |

**db006: Anyone Ever Helped**

|       | Freq. | %      |
|-------|-------|--------|
| 1 Yes | 353   | 50.14  |
| 2 No  | 351   | 49.86  |
| Total | 704   | 100.00 |

**db007: Difficulty with Getting into or out of Bed**

|                                       | Freq.  | %      |
|---------------------------------------|--------|--------|
| 1 Don't Have Any Difficulty           | 17,816 | 92.08  |
| 2 Have Difficulty But Can Still Do It | 1,128  | 5.83   |
| 3 Have Difficulty and Need Help       | 253    | 1.31   |
| 4 Can Not Do It                       | 152    | 0.79   |
| Total                                 | 19,349 | 100.00 |

**db008: Anyone Ever Helped**

|       | Freq. | %      |
|-------|-------|--------|
| 1 Yes | 492   | 32.11  |
| 2 No  | 1,040 | 67.89  |
| Total | 1,532 | 100.00 |

**db009: Difficulty with Using the Toilet**

|                                       | Freq.  | %      |
|---------------------------------------|--------|--------|
| 1 Don't Have Any Difficulty           | 16,439 | 84.96  |
| 2 Have Difficulty But Can Still Do It | 2,399  | 12.40  |
| 3 Have Difficulty and Need Help       | 300    | 1.55   |
| 4 Can Not Do It                       | 210    | 1.09   |
| Total                                 | 19,348 | 100.00 |

**db010: Anyone Ever Helped**

|       | Freq. | %      |
|-------|-------|--------|
| 1 Yes | 526   | 18.08  |
| 2 No  | 2,383 | 81.92  |
| Total | 2,909 | 100.00 |

**db011: Difficulty with Controlling Urination and Defecation**

|                                       | Freq.  | %      |
|---------------------------------------|--------|--------|
| 1 Don't Have Any Difficulty           | 18,381 | 95.00  |
| 2 Have Difficulty But Can Still Do It | 627    | 3.24   |
| 3 Have Difficulty and Need Help       | 193    | 1.00   |
| 4 Can Not Do It                       | 147    | 0.76   |
| Total                                 | 19,348 | 100.00 |

**db012: Difficulty with Household Chores**

|  | Freq. | % |
|--|-------|---|
|--|-------|---|

|                                       |        |        |
|---------------------------------------|--------|--------|
| 1 Don't Have Any Difficulty           | 16,545 | 85.51  |
| 2 Have Difficulty But Can Still Do It | 1,262  | 6.52   |
| 3 Have Difficulty and Need Help       | 717    | 3.71   |
| 4 Can Not Do It                       | 824    | 4.26   |
| Total                                 | 19,348 | 100.00 |

**db013: Anyone Ever Helped**

|       | Freq. | %      |
|-------|-------|--------|
| 1 Yes | 1,690 | 60.29  |
| 2 No  | 1,113 | 39.71  |
| Total | 2,803 | 100.00 |

**db014: Difficulty with Preparing Hot Meals**

|                                       | Freq.  | %      |
|---------------------------------------|--------|--------|
| 1 Don't Have Any Difficulty           | 17,273 | 89.28  |
| 2 Have Difficulty But Can Still Do It | 662    | 3.42   |
| 3 Have Difficulty and Need Help       | 550    | 2.84   |
| 4 Can Not Do It                       | 862    | 4.46   |
| Total                                 | 19,347 | 100.00 |

**db015: Anyone Ever Helped**

|       | Freq. | %      |
|-------|-------|--------|
| 1 Yes | 1,455 | 70.15  |
| 2 No  | 619   | 29.85  |
| Total | 2,074 | 100.00 |

**db016: Difficulty with Shopping for Groceries**

|                                       | Freq.  | %      |
|---------------------------------------|--------|--------|
| 1 Don't Have Any Difficulty           | 17,698 | 91.48  |
| 2 Have Difficulty But Can Still Do It | 394    | 2.04   |
| 3 Have Difficulty and Need Help       | 468    | 2.42   |
| 4 Can Not Do It                       | 787    | 4.07   |
| Total                                 | 19,347 | 100.00 |

**db017: Anyone Ever Helped**

|       | Freq. | %      |
|-------|-------|--------|
| 1 Yes | 1,308 | 79.32  |
| 2 No  | 341   | 20.68  |
| Total | 1,649 | 100.00 |

**db018: Difficulty with Making Phone Calls**

|                                       | Freq.  | %     |
|---------------------------------------|--------|-------|
| 1 Don't Have Any Difficulty           | 17,532 | 90.62 |
| 2 Have Difficulty But Can Still Do It | 333    | 1.72  |



|                                 |        |        |
|---------------------------------|--------|--------|
| 3 Have Difficulty and Need Help | 502    | 2.59   |
| 4 Can Not Do It                 | 980    | 5.07   |
| Total                           | 19,347 | 100.00 |

**db019: Anyone Ever Helped**

|       | Freq. | %      |
|-------|-------|--------|
| 1 Yes | 1,206 | 66.45  |
| 2 No  | 609   | 33.55  |
| Total | 1,815 | 100.00 |

**db020: Difficulty with Taking Medications**

|                                       | Freq.  | %      |
|---------------------------------------|--------|--------|
| 1 Don't Have Any Difficulty           | 18,081 | 93.46  |
| 2 Have Difficulty But Can Still Do It | 470    | 2.43   |
| 3 Have Difficulty and Need Help       | 531    | 2.74   |
| 4 Can Not Do It                       | 265    | 1.37   |
| Total                                 | 19,347 | 100.00 |

**db021: Anyone Ever Helped**

|       | Freq. | %      |
|-------|-------|--------|
| 1 Yes | 814   | 64.30  |
| 2 No  | 452   | 35.70  |
| Total | 1,266 | 100.00 |

**db022: Difficulty with Managing Money**

|                                       | Freq.  | %      |
|---------------------------------------|--------|--------|
| 1 Don't Have Any Difficulty           | 17,414 | 90.01  |
| 2 Have Difficulty But Can Still Do It | 493    | 2.55   |
| 3 Have Difficulty and Need Help       | 617    | 3.19   |
| 4 Can Not Do It                       | 823    | 4.25   |
| Total                                 | 19,347 | 100.00 |

**db023: Anyone Ever Helped**

|       | Freq. | %      |
|-------|-------|--------|
| 1 Yes | 1,273 | 65.86  |
| 2 No  | 660   | 34.14  |
| Total | 1,933 | 100.00 |

**db024\_s1: Helper[1]**

|          | Freq. | %      |
|----------|-------|--------|
| 0 No     | 1,372 | 39.56  |
| 1 Spouse | 2,096 | 60.44  |
| Total    | 3,468 | 100.00 |

## db024\_s2: Helper[2]

|                                                | Freq. | %      |
|------------------------------------------------|-------|--------|
| 0 No                                           | 3,440 | 99.19  |
| 2 Father, Mother, Father-in-Law, Mother-in-Law | 28    | 0.81   |
| Total                                          | 3,468 | 100.00 |

## db024\_s3: Helper[3]

|                                                        | Freq. | %      |
|--------------------------------------------------------|-------|--------|
| 0 No                                                   | 1,501 | 43.28  |
| 3 Children, Children's Spouse, Grandson, Granddaughter | 1,967 | 56.72  |
| Total                                                  | 3,468 | 100.00 |

## db024\_s4: Helper[4]

|                                                                  | Freq. | %      |
|------------------------------------------------------------------|-------|--------|
| 0 No                                                             | 3,334 | 96.14  |
| 4 Sibling, Brother-in-Law, Sister-in-Law, Sibling of Spouse, Etc | 134   | 3.86   |
| Total                                                            | 3,468 | 100.00 |

## db024\_s5: Helper[5]

|                  | Freq. | %      |
|------------------|-------|--------|
| 0 No             | 3,414 | 98.44  |
| 5 Other Relative | 54    | 1.56   |
| Total            | 3,468 | 100.00 |

## db024\_s6: Helper[6]

|                               | Freq. | %      |
|-------------------------------|-------|--------|
| 0 No                          | 3,418 | 98.56  |
| 6 Paid Helper (Such as Nanny) | 50    | 1.44   |
| Total                         | 3,468 | 100.00 |

## db024\_s7: Helper[7]

|                                     | Freq. | %      |
|-------------------------------------|-------|--------|
| 0 No                                | 3,466 | 99.94  |
| 7 Volunteer or Employee of Facility | 2     | 0.06   |
| Total                               | 3,468 | 100.00 |

## db024\_s8: Helper[8]

|                | Freq. | %      |
|----------------|-------|--------|
| 0 No           | 3,435 | 99.05  |
| 8 Nursing Home | 33    | 0.95   |
| Total          | 3,468 | 100.00 |

## db024\_s9: Helper[9]

|                                         | Freq. | %      |
|-----------------------------------------|-------|--------|
| 0 No                                    | 3,465 | 99.91  |
| 9 Staff from Home-based Nursing Service | 3     | 0.09   |
| Total                                   | 3,468 | 100.00 |

## db024\_s10: Helper[10]

|                            | Freq. | %      |
|----------------------------|-------|--------|
| 0 No                       | 3,448 | 99.42  |
| 10 Help from the Community | 20    | 0.58   |
| Total                      | 3,468 | 100.00 |

## db024\_s11: Helper[11]

|                          | Freq. | %      |
|--------------------------|-------|--------|
| 0 No                     | 3,244 | 93.54  |
| 11 Other, Please Specify | 224   | 6.46   |
| Total                    | 3,468 | 100.00 |

## db024\_1: Number of Paid Helpers

| Mean | SD   | Min  | Max  | Obs |
|------|------|------|------|-----|
| 1.02 | 0.14 | 1.00 | 2.00 | 50  |

## db025\_s1: Who Help the Most

|          | Freq. | %      |
|----------|-------|--------|
| 0 No     | 20    | 71.43  |
| 1 Father | 8     | 28.57  |
| Total    | 28    | 100.00 |

## db025\_s2: Who Help the Most

|          | Freq. | %      |
|----------|-------|--------|
| 0 No     | 10    | 35.71  |
| 2 Mother | 18    | 64.29  |
| Total    | 28    | 100.00 |

## db025\_s3: Who Help the Most

|                 | Freq. | %      |
|-----------------|-------|--------|
| 0 No            | 25    | 89.29  |
| 3 Father-in-Law | 3     | 10.71  |
| Total           | 28    | 100.00 |

## db025\_s4: Who Help the Most

|                 | Freq. | %      |
|-----------------|-------|--------|
| 0 No            | 19    | 67.86  |
| 4 Mother-in-Law | 9     | 32.14  |
| Total           | 28    | 100.00 |

**db026\_s1: Which Child's Family Helped**

|                                 | Freq. | %      |
|---------------------------------|-------|--------|
| 0 No                            | 639   | 32.49  |
| 1 Preload XChildPanAliveName[1] | 1,328 | 67.51  |
| Total                           | 1,967 | 100.00 |

**db026\_s2: Which Child's Family Helped**

|                                 | Freq. | %      |
|---------------------------------|-------|--------|
| 0 No                            | 1,035 | 52.62  |
| 2 Preload XChildPanAliveName[2] | 932   | 47.38  |
| Total                           | 1,967 | 100.00 |

**db026\_s3: Which Child's Family Helped**

|                                 | Freq. | %      |
|---------------------------------|-------|--------|
| 0 No                            | 1,363 | 69.29  |
| 3 Preload XChildPanAliveName[3] | 604   | 30.71  |
| Total                           | 1,967 | 100.00 |

**db026\_s4: Which Child's Family Helped**

|                                 | Freq. | %      |
|---------------------------------|-------|--------|
| 0 No                            | 1,602 | 81.44  |
| 4 Preload XChildPanAliveName[4] | 365   | 18.56  |
| Total                           | 1,967 | 100.00 |

**db026\_s5: Which Child's Family Helped**

|                                 | Freq. | %      |
|---------------------------------|-------|--------|
| 0 No                            | 1,774 | 90.19  |
| 5 Preload XChildPanAliveName[5] | 193   | 9.81   |
| Total                           | 1,967 | 100.00 |

**db026\_s6: Which Child's Family Helped**

|                                 | Freq. | %      |
|---------------------------------|-------|--------|
| 0 No                            | 1,894 | 96.29  |
| 6 Preload XChildPanAliveName[6] | 73    | 3.71   |
| Total                           | 1,967 | 100.00 |

**db026\_s7: Which Child's Family Helped**

|                                 | Freq. | %      |
|---------------------------------|-------|--------|
| 0 No                            | 1,934 | 98.32  |
| 7 Preload XChildPanAliveName[7] | 33    | 1.68   |
| Total                           | 1,967 | 100.00 |

**db026\_s8: Which Child's Family Helped**

|                                 | Freq. | %      |
|---------------------------------|-------|--------|
| 0 No                            | 1,956 | 99.44  |
| 8 Preload XChildPanAliveName[8] | 11    | 0.56   |
| Total                           | 1,967 | 100.00 |

**db026\_s9: Which Child's Family Helped**

|                                 | Freq. | %      |
|---------------------------------|-------|--------|
| 0 No                            | 1,966 | 99.95  |
| 9 Preload XChildPanAliveName[9] | 1     | 0.05   |
| Total                           | 1,967 | 100.00 |

**db026\_s10: Which Child's Family Helped**

|                                   | Freq. | %      |
|-----------------------------------|-------|--------|
| 0 No                              | 1,966 | 99.95  |
| 10 Preload XChildPanAliveName[10] | 1     | 0.05   |
| Total                             | 1,967 | 100.00 |

**db026\_s11: Which Child's Family Helped**

|                                   | Freq. | %      |
|-----------------------------------|-------|--------|
| 0 No                              | 1,966 | 99.95  |
| 11 Preload XChildPanAliveName[11] | 1     | 0.05   |
| Total                             | 1,967 | 100.00 |

**db026\_s12: Which Child's Family Helped**

|       | Freq. | %      |
|-------|-------|--------|
| 0 No  | 1,967 | 100.00 |
| Total | 1,967 | 100.00 |

**db026\_s13: Which Child's Family Helped**

|                                   | Freq. | %      |
|-----------------------------------|-------|--------|
| 0 No                              | 1,966 | 99.95  |
| 13 Preload XChildPanAliveName[13] | 1     | 0.05   |
| Total                             | 1,967 | 100.00 |

**db026\_s14: Which Child's Family Helped**

|       | Freq. | %      |
|-------|-------|--------|
| 0 No  | 1,967 | 100.00 |
| Total | 1,967 | 100.00 |

**db026\_s15: Which Child's Family Helped**

|       | Freq. | %      |
|-------|-------|--------|
| 0 No  | 1,967 | 100.00 |
| Total | 1,967 | 100.00 |

**db026\_s16: Which Child's Family Helped**

|       | Freq. | %      |
|-------|-------|--------|
| 0 No  | 1,967 | 100.00 |
| Total | 1,967 | 100.00 |

**db026\_s17: Which Child's Family Helped**

|       | Freq. | %      |
|-------|-------|--------|
| 0 No  | 1,967 | 100.00 |
| Total | 1,967 | 100.00 |

**db026\_s18: Which Child's Family Helped**

|       | Freq. | %      |
|-------|-------|--------|
| 0 No  | 1,967 | 100.00 |
| Total | 1,967 | 100.00 |

**db026\_s19: Which Child's Family Helped**

|       | Freq. | %      |
|-------|-------|--------|
| 0 No  | 1,967 | 100.00 |
| Total | 1,967 | 100.00 |

**db026\_s20: Which Child's Family Helped**

|       | Freq. | %      |
|-------|-------|--------|
| 0 No  | 1,967 | 100.00 |
| Total | 1,967 | 100.00 |

**db026\_s21: Which Child's Family Helped**

|       | Freq. | %      |
|-------|-------|--------|
| 0 No  | 1,967 | 100.00 |
| Total | 1,967 | 100.00 |

**db026\_s22: Which Child's Family Helped**

|       | Freq. | %      |
|-------|-------|--------|
| 0 No  | 1,967 | 100.00 |
| Total | 1,967 | 100.00 |

**db026\_s23: Which Child's Family Helped**

|       | Freq. | %      |
|-------|-------|--------|
| 0 No  | 1,967 | 100.00 |
| Total | 1,967 | 100.00 |

**db026\_s24: Which Child's Family Helped**

|       | Freq. | %      |
|-------|-------|--------|
| 0 No  | 1,967 | 100.00 |
| Total | 1,967 | 100.00 |

**db026\_s25: Which Child's Family Helped**

|       | Freq. | %      |
|-------|-------|--------|
| 0 No  | 1,967 | 100.00 |
| Total | 1,967 | 100.00 |

**db026\_s26: Which Child's Family Helped**

|                    | Freq. | %      |
|--------------------|-------|--------|
| 0 No               | 1,896 | 96.39  |
| 26 Other Child[26] | 71    | 3.61   |
| Total              | 1,967 | 100.00 |

**db026\_s27: Which Child's Family Helped**

|                    | Freq. | %      |
|--------------------|-------|--------|
| 0 No               | 1,949 | 99.08  |
| 27 Other Child[27] | 18    | 0.92   |
| Total              | 1,967 | 100.00 |

**db026\_s28: Which Child's Family Helped**

|                    | Freq. | %      |
|--------------------|-------|--------|
| 0 No               | 1,962 | 99.75  |
| 28 Other Child[28] | 5     | 0.25   |
| Total              | 1,967 | 100.00 |

**db026\_s29: Which Child's Family Helped**

|      | Freq. | %     |
|------|-------|-------|
| 0 No | 1,964 | 99.85 |

|                    |       |        |
|--------------------|-------|--------|
| 29 Other Child[29] | 3     | 0.15   |
| Total              | 1,967 | 100.00 |

**db026\_s30: Which Child's Family Helped**

|       | Freq. | %      |
|-------|-------|--------|
| 0 No  | 1,967 | 100.00 |
| Total | 1,967 | 100.00 |

**db026\_s31: Which Child's Family Helped**

|       | Freq. | %      |
|-------|-------|--------|
| 0 No  | 1,967 | 100.00 |
| Total | 1,967 | 100.00 |

**db026\_s32: Which Child's Family Helped**

|       | Freq. | %      |
|-------|-------|--------|
| 0 No  | 1,967 | 100.00 |
| Total | 1,967 | 100.00 |

**db026\_s33: Which Child's Family Helped**

|       | Freq. | %      |
|-------|-------|--------|
| 0 No  | 1,967 | 100.00 |
| Total | 1,967 | 100.00 |

**db026\_s34: Which Child's Family Helped**

|       | Freq. | %      |
|-------|-------|--------|
| 0 No  | 1,967 | 100.00 |
| Total | 1,967 | 100.00 |

**db026\_s35: Which Child's Family Helped**

|       | Freq. | %      |
|-------|-------|--------|
| 0 No  | 1,967 | 100.00 |
| Total | 1,967 | 100.00 |

**db027\_1\_\_s1: Who in Child[1]'s Family Helped**

|                   | Freq. | %      |
|-------------------|-------|--------|
| 0 No              | 181   | 13.63  |
| 1 Himself/herself | 1,147 | 86.37  |
| Total             | 1,328 | 100.00 |

**db027\_1\_\_s2: Who in Child[1]'s Family Helped**



|                  | Freq. | %      |
|------------------|-------|--------|
| 0 No             | 605   | 45.56  |
| 2 His/her Spouse | 723   | 54.44  |
| Total            | 1,328 | 100.00 |

**db027\_1\_\_s3: Who in Child[1]'s Family Helped**

|                    | Freq. | %      |
|--------------------|-------|--------|
| 0 No               | 757   | 57.00  |
| 3 His/her Children | 571   | 43.00  |
| Total              | 1,328 | 100.00 |

**db027\_2\_\_s1: Who in Child[2]'s Family Helped**

|                   | Freq. | %      |
|-------------------|-------|--------|
| 0 No              | 88    | 9.44   |
| 1 Himself/herself | 844   | 90.56  |
| Total             | 932   | 100.00 |

**db027\_2\_\_s2: Who in Child[2]'s Family Helped**

|                  | Freq. | %      |
|------------------|-------|--------|
| 0 No             | 462   | 49.57  |
| 2 His/her Spouse | 470   | 50.43  |
| Total            | 932   | 100.00 |

**db027\_2\_\_s3: Who in Child[2]'s Family Helped**

|                    | Freq. | %      |
|--------------------|-------|--------|
| 0 No               | 586   | 62.88  |
| 3 His/her Children | 346   | 37.12  |
| Total              | 932   | 100.00 |

**db027\_3\_\_s1: Who in Child[3]'s Family Helped**

|                   | Freq. | %      |
|-------------------|-------|--------|
| 0 No              | 49    | 8.11   |
| 1 Himself/herself | 555   | 91.89  |
| Total             | 604   | 100.00 |

**db027\_3\_\_s2: Who in Child[3]'s Family Helped**

|                  | Freq. | %      |
|------------------|-------|--------|
| 0 No             | 306   | 50.66  |
| 2 His/her Spouse | 298   | 49.34  |
| Total            | 604   | 100.00 |

**db027\_3\_\_s3: Who in Child[3]'s Family Helped**

|                    | Freq. | %      |
|--------------------|-------|--------|
| 0 No               | 389   | 64.40  |
| 3 His/her Children | 215   | 35.60  |
| Total              | 604   | 100.00 |

**db027\_4\_\_s1: Who in Child[4]’s Family Helped**

|                   | Freq. | %      |
|-------------------|-------|--------|
| 0 No              | 23    | 6.30   |
| 1 Himself/herself | 342   | 93.70  |
| Total             | 365   | 100.00 |

**db027\_4\_\_s2: Who in Child[4]’s Family Helped**

|                  | Freq. | %      |
|------------------|-------|--------|
| 0 No             | 194   | 53.15  |
| 2 His/her Spouse | 171   | 46.85  |
| Total            | 365   | 100.00 |

**db027\_4\_\_s3: Who in Child[4]’s Family Helped**

|                    | Freq. | %      |
|--------------------|-------|--------|
| 0 No               | 252   | 69.04  |
| 3 His/her Children | 113   | 30.96  |
| Total              | 365   | 100.00 |

**db027\_5\_\_s1: Who in Child[5]’s Family Helped**

|                   | Freq. | %      |
|-------------------|-------|--------|
| 0 No              | 12    | 6.22   |
| 1 Himself/herself | 181   | 93.78  |
| Total             | 193   | 100.00 |

**db027\_5\_\_s2: Who in Child[5]’s Family Helped**

|                  | Freq. | %      |
|------------------|-------|--------|
| 0 No             | 89    | 46.11  |
| 2 His/her Spouse | 104   | 53.89  |
| Total            | 193   | 100.00 |

**db027\_5\_\_s3: Who in Child[5]’s Family Helped**

|                    | Freq. | %      |
|--------------------|-------|--------|
| 0 No               | 131   | 67.88  |
| 3 His/her Children | 62    | 32.12  |
| Total              | 193   | 100.00 |

**db027\_6\_\_s1: Who in Child[6]’s Family Helped**

|                   | Freq. | %      |
|-------------------|-------|--------|
| 0 No              | 3     | 4.11   |
| 1 Himself/herself | 70    | 95.89  |
| Total             | 73    | 100.00 |

## db027\_6\_\_s2: Who in Child[6]'s Family Helped

|                  | Freq. | %      |
|------------------|-------|--------|
| 0 No             | 36    | 49.32  |
| 2 His/her Spouse | 37    | 50.68  |
| Total            | 73    | 100.00 |

## db027\_6\_\_s3: Who in Child[6]'s Family Helped

|                    | Freq. | %      |
|--------------------|-------|--------|
| 0 No               | 49    | 67.12  |
| 3 His/her Children | 24    | 32.88  |
| Total              | 73    | 100.00 |

## db027\_7\_\_s1: Who in Child[7]'s Family Helped

|                   | Freq. | %      |
|-------------------|-------|--------|
| 1 Himself/herself | 33    | 100.00 |
| Total             | 33    | 100.00 |

## db027\_7\_\_s2: Who in Child[7]'s Family Helped

|                  | Freq. | %      |
|------------------|-------|--------|
| 0 No             | 15    | 45.45  |
| 2 His/her Spouse | 18    | 54.55  |
| Total            | 33    | 100.00 |

## db027\_7\_\_s3: Who in Child[7]'s Family Helped

|                    | Freq. | %      |
|--------------------|-------|--------|
| 0 No               | 25    | 75.76  |
| 3 His/her Children | 8     | 24.24  |
| Total              | 33    | 100.00 |

## db027\_8\_\_s1: Who in Child[8]'s Family Helped

|                   | Freq. | %      |
|-------------------|-------|--------|
| 1 Himself/herself | 11    | 100.00 |
| Total             | 11    | 100.00 |

## db027\_8\_\_s2: Who in Child[8]'s Family Helped

|                  | Freq. | %      |
|------------------|-------|--------|
| 0 No             | 7     | 63.64  |
| 2 His/her Spouse | 4     | 36.36  |
| Total            | 11    | 100.00 |

**db027\_8\_\_s3: Who in Child[8]'s Family Helped**

|                    | Freq. | %      |
|--------------------|-------|--------|
| 0 No               | 9     | 81.82  |
| 3 His/her Children | 2     | 18.18  |
| Total              | 11    | 100.00 |

**db027\_9\_\_s1: Who in Child[9]'s Family Helped**

|                   | Freq. | %      |
|-------------------|-------|--------|
| 1 Himself/herself | 1     | 100.00 |
| Total             | 1     | 100.00 |

**db027\_9\_\_s2: Who in Child[9]'s Family Helped**

|                  | Freq. | %      |
|------------------|-------|--------|
| 2 His/her Spouse | 1     | 100.00 |
| Total            | 1     | 100.00 |

**db027\_9\_\_s3: Who in Child[9]'s Family Helped**

|                    | Freq. | %      |
|--------------------|-------|--------|
| 3 His/her Children | 1     | 100.00 |
| Total              | 1     | 100.00 |

**db027\_10\_\_s1: Who in Child[10]'s Family Helped**

|                   | Freq. | %      |
|-------------------|-------|--------|
| 1 Himself/herself | 1     | 100.00 |
| Total             | 1     | 100.00 |

**db027\_10\_\_s2: Who in Child[10]'s Family Helped**

|       | Freq. | %      |
|-------|-------|--------|
| 0 No  | 1     | 100.00 |
| Total | 1     | 100.00 |

**db027\_10\_\_s3: Who in Child[10]'s Family Helped**

|       | Freq. | %      |
|-------|-------|--------|
| 0 No  | 1     | 100.00 |
| Total | 1     | 100.00 |

**db027\_11\_\_s1: Who in Child[11]'s Family Helped**

|                   | Freq. | %      |
|-------------------|-------|--------|
| 1 Himself/herself | 1     | 100.00 |
| Total             | 1     | 100.00 |

**db027\_11\_\_s2: Who in Child[11]'s Family Helped**

|       | Freq. | %      |
|-------|-------|--------|
| 0 No  | 1     | 100.00 |
| Total | 1     | 100.00 |

**db027\_11\_\_s3: Who in Child[11]'s Family Helped**

|       | Freq. | %      |
|-------|-------|--------|
| 0 No  | 1     | 100.00 |
| Total | 1     | 100.00 |

**db027\_12\_\_s1: Who in Child[12]'s Family Helped**

|                 |
|-----------------|
| No Observations |
|-----------------|

**db027\_12\_\_s2: Who in Child[12]'s Family Helped**

|                 |
|-----------------|
| No Observations |
|-----------------|

**db027\_12\_\_s3: Who in Child[12]'s Family Helped**

|                 |
|-----------------|
| No Observations |
|-----------------|

**db027\_13\_\_s1: Who in Child[13]'s Family Helped**

|                   | Freq. | %      |
|-------------------|-------|--------|
| 1 Himself/herself | 1     | 100.00 |
| Total             | 1     | 100.00 |

**db027\_13\_\_s2: Who in Child[13]'s Family Helped**

|                  | Freq. | %      |
|------------------|-------|--------|
| 2 His/her Spouse | 1     | 100.00 |
| Total            | 1     | 100.00 |

**db027\_13\_\_s3: Who in Child[13]'s Family Helped**

|                    | Freq. | %      |
|--------------------|-------|--------|
| 3 His/her Children | 1     | 100.00 |
| Total              | 1     | 100.00 |

db027\_14\_\_s1: Who in Child[14]'s Family Helped

---

No Observations

---

db027\_14\_\_s2: Who in Child[14]'s Family Helped

---

No Observations

---

db027\_14\_\_s3: Who in Child[14]'s Family Helped

---

No Observations

---

db027\_15\_\_s1: Who in Child[15]'s Family Helped

---

No Observations

---

db027\_15\_\_s2: Who in Child[15]'s Family Helped

---

No Observations

---

db027\_15\_\_s3: Who in Child[15]'s Family Helped

---

No Observations

---

db027\_16\_\_s1: Who in Child[16]'s Family Helped

---

No Observations

---

db027\_16\_\_s2: Who in Child[16]'s Family Helped

---

No Observations

---

db027\_16\_\_s3: Who in Child[16]'s Family Helped

---

No Observations

---

db027\_17\_\_s1: Who in Child[17]'s Family Helped

---

No Observations

---

db027\_17\_\_s2: Who in Child[17]'s Family Helped

---

No Observations

---

db027\_17\_\_s3: Who in Child[17]'s Family Helped

---

No Observations

---

db027\_18\_\_s1: Who in Child[18]'s Family Helped

No Observations

db027\_18\_\_s2: Who in Child[18]'s Family Helped

No Observations

db027\_18\_\_s3: Who in Child[18]'s Family Helped

No Observations

db027\_19\_\_s1: Who in Child[19]'s Family Helped

No Observations

db027\_19\_\_s2: Who in Child[19]'s Family Helped

No Observations

db027\_19\_\_s3: Who in Child[19]'s Family Helped

No Observations

db027\_20\_\_s1: Who in Child[20]'s Family Helped

No Observations

db027\_20\_\_s2: Who in Child[20]'s Family Helped

No Observations

db027\_20\_\_s3: Who in Child[20]'s Family Helped

No Observations

db027\_21\_\_s1: Who in Child[21]'s Family Helped

No Observations

db027\_21\_\_s2: Who in Child[21]'s Family Helped

No Observations

db027\_21\_\_s3: Who in Child[21]'s Family Helped

No Observations

db027\_22\_\_s1: Who in Child[22]'s Family Helped

---

No Observations

---

db027\_22\_\_s2: Who in Child[22]'s Family Helped

---

No Observations

---

db027\_22\_\_s3: Who in Child[22]'s Family Helped

---

No Observations

---

db027\_23\_\_s1: Who in Child[23]'s Family Helped

---

No Observations

---

db027\_23\_\_s2: Who in Child[23]'s Family Helped

---

No Observations

---

db027\_23\_\_s3: Who in Child[23]'s Family Helped

---

No Observations

---

db027\_24\_\_s1: Who in Child[24]'s Family Helped

---

No Observations

---

db027\_24\_\_s2: Who in Child[24]'s Family Helped

---

No Observations

---

db027\_24\_\_s3: Who in Child[24]'s Family Helped

---

No Observations

---

db027\_25\_\_s1: Who in Child[25]'s Family Helped

---

No Observations

---

db027\_25\_\_s2: Who in Child[25]'s Family Helped

---

No Observations

---

db027\_25\_\_s3: Who in Child[25]'s Family Helped

---

No Observations

---



**db027\_26\_\_s1: Who in Child[26]'s Family Helped**

|                   | Freq. | %      |
|-------------------|-------|--------|
| 0 No              | 13    | 18.31  |
| 1 Himself/herself | 58    | 81.69  |
| Total             | 71    | 100.00 |

**db027\_26\_\_s2: Who in Child[26]'s Family Helped**

|                  | Freq. | %      |
|------------------|-------|--------|
| 0 No             | 48    | 67.61  |
| 2 His/her Spouse | 23    | 32.39  |
| Total            | 71    | 100.00 |

**db027\_26\_\_s3: Who in Child[26]'s Family Helped**

|                    | Freq. | %      |
|--------------------|-------|--------|
| 0 No               | 47    | 66.20  |
| 3 His/her Children | 24    | 33.80  |
| Total              | 71    | 100.00 |

**db027\_27\_\_s1: Who in Child[27]'s Family Helped**

|                   | Freq. | %      |
|-------------------|-------|--------|
| 1 Himself/herself | 18    | 100.00 |
| Total             | 18    | 100.00 |

**db027\_27\_\_s2: Who in Child[27]'s Family Helped**

|                  | Freq. | %      |
|------------------|-------|--------|
| 0 No             | 11    | 61.11  |
| 2 His/her Spouse | 7     | 38.89  |
| Total            | 18    | 100.00 |

**db027\_27\_\_s3: Who in Child[27]'s Family Helped**

|                    | Freq. | %      |
|--------------------|-------|--------|
| 0 No               | 15    | 83.33  |
| 3 His/her Children | 3     | 16.67  |
| Total              | 18    | 100.00 |

**db027\_28\_\_s1: Who in Child[28]'s Family Helped**

|                   | Freq. | %      |
|-------------------|-------|--------|
| 1 Himself/herself | 5     | 100.00 |
| Total             | 5     | 100.00 |

**db027\_28\_\_s2: Who in Child[28]'s Family Helped**

|                  | Freq. | %      |
|------------------|-------|--------|
| 0 No             | 3     | 60.00  |
| 2 His/her Spouse | 2     | 40.00  |
| Total            | 5     | 100.00 |

**db027\_28\_\_s3: Who in Child[28]'s Family Helped**

|                    | Freq. | %      |
|--------------------|-------|--------|
| 0 No               | 3     | 60.00  |
| 3 His/her Children | 2     | 40.00  |
| Total              | 5     | 100.00 |

**db027\_29\_\_s1: Who in Child[29]'s Family Helped**

|                   | Freq. | %      |
|-------------------|-------|--------|
| 1 Himself/herself | 3     | 100.00 |
| Total             | 3     | 100.00 |

**db027\_29\_\_s2: Who in Child[29]'s Family Helped**

|       | Freq. | %      |
|-------|-------|--------|
| 0 No  | 3     | 100.00 |
| Total | 3     | 100.00 |

**db027\_29\_\_s3: Who in Child[29]'s Family Helped**

|                    | Freq. | %      |
|--------------------|-------|--------|
| 0 No               | 2     | 66.67  |
| 3 His/her Children | 1     | 33.33  |
| Total              | 3     | 100.00 |

**db027\_30\_\_s1: Who in Child[30]'s Family Helped**

|                 |
|-----------------|
| No Observations |
|-----------------|

**db027\_30\_\_s2: Who in Child[30]'s Family Helped**

|                 |
|-----------------|
| No Observations |
|-----------------|

**db027\_30\_\_s3: Who in Child[30]'s Family Helped**

|                 |
|-----------------|
| No Observations |
|-----------------|

**db027\_31\_\_s1: Who in Child[31]'s Family Helped**

|                 |
|-----------------|
| No Observations |
|-----------------|

db027\_31\_\_s2: Who in Child[31]'s Family Helped

No Observations

db027\_31\_\_s3: Who in Child[31]'s Family Helped

No Observations

db027\_32\_\_s1: Who in Child[32]'s Family Helped

No Observations

db027\_32\_\_s2: Who in Child[32]'s Family Helped

No Observations

db027\_32\_\_s3: Who in Child[32]'s Family Helped

No Observations

db027\_33\_\_s1: Who in Child[33]'s Family Helped

No Observations

db027\_33\_\_s2: Who in Child[33]'s Family Helped

No Observations

db027\_33\_\_s3: Who in Child[33]'s Family Helped

No Observations

db027\_34\_\_s1: Who in Child[34]'s Family Helped

No Observations

db027\_34\_\_s2: Who in Child[34]'s Family Helped

No Observations

db027\_34\_\_s3: Who in Child[34]'s Family Helped

No Observations

db027\_35\_\_s1: Who in Child[35]'s Family Helped

No Observations

**db027\_35\_\_s2: Who in Child[35]’s Family Helped**

No Observations

**db027\_35\_\_s3: Who in Child[35]’s Family Helped**

No Observations

**db027\_1\_1\_: Number of Children Helped**

| Mean | SD   | Min   | Max  | Obs |
|------|------|-------|------|-----|
| 1.63 | 0.74 | -1.00 | 5.00 | 572 |

**db027\_1\_2\_: Number of Children Helped**

| Mean | SD   | Min  | Max  | Obs |
|------|------|------|------|-----|
| 1.63 | 0.68 | 1.00 | 4.00 | 346 |

**db027\_1\_3\_: Number of Children Helped**

| Mean | SD   | Min  | Max  | Obs |
|------|------|------|------|-----|
| 1.66 | 0.74 | 1.00 | 5.00 | 215 |

**db027\_1\_4\_: Number of Children Helped**

| Mean | SD   | Min  | Max  | Obs |
|------|------|------|------|-----|
| 1.72 | 0.73 | 1.00 | 5.00 | 113 |

**db027\_1\_5\_: Number of Children Helped**

| Mean | SD   | Min  | Max  | Obs |
|------|------|------|------|-----|
| 1.79 | 1.04 | 1.00 | 6.00 | 62  |

**db027\_1\_6\_: Number of Children Helped**

| Mean | SD   | Min  | Max  | Obs |
|------|------|------|------|-----|
| 1.67 | 1.01 | 1.00 | 5.00 | 24  |

**db027\_1\_7\_: Number of Children Helped**

| Mean | SD   | Min  | Max  | Obs |
|------|------|------|------|-----|
| 2.13 | 1.64 | 1.00 | 6.00 | 8   |

**db027\_1\_8\_: Number of Children Helped**

| Mean | SD   | Min  | Max  | Obs |
|------|------|------|------|-----|
| 2.00 | 0.00 | 2.00 | 2.00 | 2   |

db027\_1\_9\_: Number of Children Helped

| Mean | SD | Min  | Max  | Obs |
|------|----|------|------|-----|
| 2.00 | .  | 2.00 | 2.00 | 1   |

db027\_1\_10\_: Number of Children Helped

|                 |
|-----------------|
| No Observations |
|-----------------|

db027\_1\_11\_: Number of Children Helped

|                 |
|-----------------|
| No Observations |
|-----------------|

db027\_1\_12\_: Number of Children Helped

|                 |
|-----------------|
| No Observations |
|-----------------|

db027\_1\_13\_: Number of Children Helped

| Mean | SD | Min  | Max  | Obs |
|------|----|------|------|-----|
| 1.00 | .  | 1.00 | 1.00 | 1   |

db027\_1\_14\_: Number of Children Helped

|                 |
|-----------------|
| No Observations |
|-----------------|

db027\_1\_15\_: Number of Children Helped

|                 |
|-----------------|
| No Observations |
|-----------------|

db027\_1\_16\_: Number of Children Helped

|                 |
|-----------------|
| No Observations |
|-----------------|

db027\_1\_17\_: Number of Children Helped

|                 |
|-----------------|
| No Observations |
|-----------------|

db027\_1\_18\_: Number of Children Helped

|                 |
|-----------------|
| No Observations |
|-----------------|

db027\_1\_19\_: Number of Children Helped

|                 |
|-----------------|
| No Observations |
|-----------------|

db027\_1\_20\_: Number of Children Helped

|                 |
|-----------------|
| No Observations |
|-----------------|

db027\_1\_21\_: Number of Children Helped

|                 |
|-----------------|
| No Observations |
|-----------------|

db027\_1\_22\_: Number of Children Helped

|                 |
|-----------------|
| No Observations |
|-----------------|

db027\_1\_23\_: Number of Children Helped

|                 |
|-----------------|
| No Observations |
|-----------------|

db027\_1\_24\_: Number of Children Helped

|                 |
|-----------------|
| No Observations |
|-----------------|

db027\_1\_25\_: Number of Children Helped

|                 |
|-----------------|
| No Observations |
|-----------------|

db027\_1\_26\_: Number of Children Helped

| Mean | SD   | Min  | Max  | Obs |
|------|------|------|------|-----|
| 1.71 | 0.95 | 1.00 | 5.00 | 24  |

db027\_1\_27\_: Number of Children Helped

| Mean | SD   | Min  | Max  | Obs |
|------|------|------|------|-----|
| 1.67 | 0.58 | 1.00 | 2.00 | 3   |

db027\_1\_28\_: Number of Children Helped

| Mean | SD   | Min  | Max  | Obs |
|------|------|------|------|-----|
| 2.00 | 0.00 | 2.00 | 2.00 | 2   |

db027\_1\_29\_: Number of Children Helped

| Mean | SD | Min | Max | Obs |
|------|----|-----|-----|-----|
|------|----|-----|-----|-----|

|      |   |      |      |   |
|------|---|------|------|---|
| 1.00 | . | 1.00 | 1.00 | 1 |
|------|---|------|------|---|

**db027\_1\_30\_:** Number of Children Helped

|                 |
|-----------------|
| No Observations |
|-----------------|

**db027\_1\_31\_:** Number of Children Helped

|                 |
|-----------------|
| No Observations |
|-----------------|

**db027\_1\_32\_:** Number of Children Helped

|                 |
|-----------------|
| No Observations |
|-----------------|

**db027\_1\_33\_:** Number of Children Helped

|                 |
|-----------------|
| No Observations |
|-----------------|

**db027\_1\_34\_:** Number of Children Helped

|                 |
|-----------------|
| No Observations |
|-----------------|

**db027\_1\_35\_:** Number of Children Helped

|                 |
|-----------------|
| No Observations |
|-----------------|

**db028\_s1:** Which Sibling's Family Helps

|                       | Freq. | %      |
|-----------------------|-------|--------|
| 0 No                  | 83    | 61.94  |
| 1 Preload XSibName[1] | 51    | 38.06  |
| Total                 | 134   | 100.00 |

**db028\_s2:** Which Sibling's Family Helps

|                       | Freq. | %      |
|-----------------------|-------|--------|
| 0 No                  | 82    | 61.19  |
| 2 Preload XSibName[2] | 52    | 38.81  |
| Total                 | 134   | 100.00 |

**db028\_s3:** Which Sibling's Family Helps

|                       | Freq. | %      |
|-----------------------|-------|--------|
| 0 No                  | 88    | 65.67  |
| 3 Preload XSibName[3] | 46    | 34.33  |
| Total                 | 134   | 100.00 |

**db028\_s4:** Which Sibling's Family Helps

|                       | Freq. | %      |
|-----------------------|-------|--------|
| 0 No                  | 94    | 70.15  |
| 4 Preload XSibName[4] | 40    | 29.85  |
| Total                 | 134   | 100.00 |

**db028\_s5: Which Sibling's Family Helps**

|                       | Freq. | %      |
|-----------------------|-------|--------|
| 0 No                  | 105   | 78.36  |
| 5 Preload XSibName[5] | 29    | 21.64  |
| Total                 | 134   | 100.00 |

**db028\_s6: Which Sibling's Family Helps**

|                       | Freq. | %      |
|-----------------------|-------|--------|
| 0 No                  | 115   | 85.82  |
| 6 Preload XSibName[6] | 19    | 14.18  |
| Total                 | 134   | 100.00 |

**db028\_s7: Which Sibling's Family Helps**

|                       | Freq. | %      |
|-----------------------|-------|--------|
| 0 No                  | 127   | 94.78  |
| 7 Preload XSibName[7] | 7     | 5.22   |
| Total                 | 134   | 100.00 |

**db028\_s8: Which Sibling's Family Helps**

|                       | Freq. | %      |
|-----------------------|-------|--------|
| 0 No                  | 133   | 99.25  |
| 8 Preload XSibName[8] | 1     | 0.75   |
| Total                 | 134   | 100.00 |

**db028\_s9: Which Sibling's Family Helps**

|                       | Freq. | %      |
|-----------------------|-------|--------|
| 0 No                  | 133   | 99.25  |
| 9 Preload XSibName[9] | 1     | 0.75   |
| Total                 | 134   | 100.00 |

**db028\_s10: Which Sibling's Family Helps**

|       | Freq. | %      |
|-------|-------|--------|
| 0 No  | 134   | 100.00 |
| Total | 134   | 100.00 |

**db028\_s11: Which Sibling's Family Helps**



|       | Freq. | %      |
|-------|-------|--------|
| 0 No  | 134   | 100.00 |
| Total | 134   | 100.00 |

**db028\_s12: Which Sibling's Family Helps**

|       | Freq. | %      |
|-------|-------|--------|
| 0 No  | 134   | 100.00 |
| Total | 134   | 100.00 |

**db028\_s13: Which Sibling's Family Helps**

|       | Freq. | %      |
|-------|-------|--------|
| 0 No  | 134   | 100.00 |
| Total | 134   | 100.00 |

**db028\_s14: Which Sibling's Family Helps**

|       | Freq. | %      |
|-------|-------|--------|
| 0 No  | 134   | 100.00 |
| Total | 134   | 100.00 |

**db028\_s15: Which Sibling's Family Helps**

|       | Freq. | %      |
|-------|-------|--------|
| 0 No  | 134   | 100.00 |
| Total | 134   | 100.00 |

**db028\_s16: Which Sibling's Family Helps**

|                         | Freq. | %      |
|-------------------------|-------|--------|
| 0 No                    | 108   | 80.60  |
| 16 Preload XSibName[16] | 26    | 19.40  |
| Total                   | 134   | 100.00 |

**db028\_s17: Which Sibling's Family Helps**

|                         | Freq. | %      |
|-------------------------|-------|--------|
| 0 No                    | 102   | 76.12  |
| 17 Preload XSibName[17] | 32    | 23.88  |
| Total                   | 134   | 100.00 |

**db028\_s18: Which Sibling's Family Helps**

|                         | Freq. | %     |
|-------------------------|-------|-------|
| 0 No                    | 101   | 75.37 |
| 18 Preload XSibName[18] | 33    | 24.63 |

|       |     |        |
|-------|-----|--------|
| Total | 134 | 100.00 |
|-------|-----|--------|

**db028\_s19: Which Sibling's Family Helps**

|                         | Freq. | %      |
|-------------------------|-------|--------|
| 0 No                    | 113   | 84.33  |
| 19 Preload XSibName[19] | 21    | 15.67  |
| Total                   | 134   | 100.00 |

**db028\_s20: Which Sibling's Family Helps**

|                         | Freq. | %      |
|-------------------------|-------|--------|
| 0 No                    | 129   | 96.27  |
| 20 Preload XSibName[20] | 5     | 3.73   |
| Total                   | 134   | 100.00 |

**db028\_s21: Which Sibling's Family Helps**

|                         | Freq. | %      |
|-------------------------|-------|--------|
| 0 No                    | 130   | 97.01  |
| 21 Preload XSibName[21] | 4     | 2.99   |
| Total                   | 134   | 100.00 |

**db028\_s22: Which Sibling's Family Helps**

|                         | Freq. | %      |
|-------------------------|-------|--------|
| 0 No                    | 131   | 97.76  |
| 22 Preload XSibName[22] | 3     | 2.24   |
| Total                   | 134   | 100.00 |

**db028\_s23: Which Sibling's Family Helps**

|       | Freq. | %      |
|-------|-------|--------|
| 0 No  | 134   | 100.00 |
| Total | 134   | 100.00 |

**db028\_s24: Which Sibling's Family Helps**

|       | Freq. | %      |
|-------|-------|--------|
| 0 No  | 134   | 100.00 |
| Total | 134   | 100.00 |

**db028\_s25: Which Sibling's Family Helps**

|       | Freq. | %      |
|-------|-------|--------|
| 0 No  | 134   | 100.00 |
| Total | 134   | 100.00 |

**db028\_s26: Which Sibling's Family Helps**

|       | Freq. | %      |
|-------|-------|--------|
| 0 No  | 134   | 100.00 |
| Total | 134   | 100.00 |

**db028\_s27: Which Sibling's Family Helps**

|       | Freq. | %      |
|-------|-------|--------|
| 0 No  | 134   | 100.00 |
| Total | 134   | 100.00 |

**db028\_s28: Which Sibling's Family Helps**

|       | Freq. | %      |
|-------|-------|--------|
| 0 No  | 134   | 100.00 |
| Total | 134   | 100.00 |

**db028\_s29: Which Sibling's Family Helps**

|       | Freq. | %      |
|-------|-------|--------|
| 0 No  | 134   | 100.00 |
| Total | 134   | 100.00 |

**db028\_s30: Which Sibling's Family Helps**

|       | Freq. | %      |
|-------|-------|--------|
| 0 No  | 134   | 100.00 |
| Total | 134   | 100.00 |

**db028\_s31: Which Sibling's Family Helps**

|                      | Freq. | %      |
|----------------------|-------|--------|
| 0 No                 | 114   | 85.07  |
| 31 Other Sibling[31] | 20    | 14.93  |
| Total                | 134   | 100.00 |

**db028\_s32: Which Sibling's Family Helps**

|                      | Freq. | %      |
|----------------------|-------|--------|
| 0 No                 | 130   | 97.01  |
| 32 Other Sibling[32] | 4     | 2.99   |
| Total                | 134   | 100.00 |

**db028\_s33: Which Sibling's Family Helps**

|      | Freq. | %     |
|------|-------|-------|
| 0 No | 133   | 99.25 |

|                      |     |        |
|----------------------|-----|--------|
| 33 Other Sibling[33] | 1   | 0.75   |
| Total                | 134 | 100.00 |

**db028\_s34: Which Sibling's Family Helps**

|                      | Freq. | %      |
|----------------------|-------|--------|
| 0 No                 | 133   | 99.25  |
| 34 Other Sibling[34] | 1     | 0.75   |
| Total                | 134   | 100.00 |

**db028\_s35: Which Sibling's Family Helps**

|       | Freq. | %      |
|-------|-------|--------|
| 0 No  | 134   | 100.00 |
| Total | 134   | 100.00 |

**db028\_s36: Which Sibling's Family Helps**

|       | Freq. | %      |
|-------|-------|--------|
| 0 No  | 134   | 100.00 |
| Total | 134   | 100.00 |

**db028\_s37: Which Sibling's Family Helps**

|       | Freq. | %      |
|-------|-------|--------|
| 0 No  | 134   | 100.00 |
| Total | 134   | 100.00 |

**db028\_s38: Which Sibling's Family Helps**

|       | Freq. | %      |
|-------|-------|--------|
| 0 No  | 134   | 100.00 |
| Total | 134   | 100.00 |

**db028\_s39: Which Sibling's Family Helps**

|       | Freq. | %      |
|-------|-------|--------|
| 0 No  | 134   | 100.00 |
| Total | 134   | 100.00 |

**db028\_s40: Which Sibling's Family Helps**

|       | Freq. | %      |
|-------|-------|--------|
| 0 No  | 134   | 100.00 |
| Total | 134   | 100.00 |

**db029\_1\_s1: Who Help in Person from Sibling[1]'s Family**

|                   | Freq. | %      |
|-------------------|-------|--------|
| 0 No              | 6     | 11.76  |
| 1 Himself/herself | 45    | 88.24  |
| Total             | 51    | 100.00 |

**db029\_1\_\_s2: Who Help in Person from Sibling[1]'s Family**

|                  | Freq. | %      |
|------------------|-------|--------|
| 0 No             | 22    | 43.14  |
| 2 His/her Spouse | 29    | 56.86  |
| Total            | 51    | 100.00 |

**db029\_1\_\_s3: Who Help in Person from Sibling[1]'s Family**

|                    | Freq. | %      |
|--------------------|-------|--------|
| 0 No               | 24    | 47.06  |
| 3 His/her Children | 27    | 52.94  |
| Total              | 51    | 100.00 |

**db029\_2\_\_s1: Who Help in Person from Sibling[2]'s Family**

|                   | Freq. | %      |
|-------------------|-------|--------|
| 0 No              | 6     | 11.54  |
| 1 Himself/herself | 46    | 88.46  |
| Total             | 52    | 100.00 |

**db029\_2\_\_s2: Who Help in Person from Sibling[2]'s Family**

|                  | Freq. | %      |
|------------------|-------|--------|
| 0 No             | 26    | 50.00  |
| 2 His/her Spouse | 26    | 50.00  |
| Total            | 52    | 100.00 |

**db029\_2\_\_s3: Who Help in Person from Sibling[2]'s Family**

|                    | Freq. | %      |
|--------------------|-------|--------|
| 0 No               | 28    | 53.85  |
| 3 His/her Children | 24    | 46.15  |
| Total              | 52    | 100.00 |

**db029\_3\_\_s1: Who Help in Person from Sibling[3]'s Family**

|                   | Freq. | %      |
|-------------------|-------|--------|
| 0 No              | 3     | 6.52   |
| 1 Himself/herself | 43    | 93.48  |
| Total             | 46    | 100.00 |

**db029\_3\_\_s2: Who Help in Person from Sibling[3]'s Family**

|                  | Freq. | %      |
|------------------|-------|--------|
| 0 No             | 21    | 45.65  |
| 2 His/her Spouse | 25    | 54.35  |
| Total            | 46    | 100.00 |

**db029\_3\_\_s3: Who Help in Person from Sibling[3]'s Family**

|                    | Freq. | %      |
|--------------------|-------|--------|
| 0 No               | 27    | 58.70  |
| 3 His/her Children | 19    | 41.30  |
| Total              | 46    | 100.00 |

**db029\_4\_\_s1: Who Help in Person from Sibling[4]'s Family**

|                   | Freq. | %      |
|-------------------|-------|--------|
| 0 No              | 1     | 2.50   |
| 1 Himself/herself | 39    | 97.50  |
| Total             | 40    | 100.00 |

**db029\_4\_\_s2: Who Help in Person from Sibling[4]'s Family**

|                  | Freq. | %      |
|------------------|-------|--------|
| 0 No             | 25    | 62.50  |
| 2 His/her Spouse | 15    | 37.50  |
| Total            | 40    | 100.00 |

**db029\_4\_\_s3: Who Help in Person from Sibling[4]'s Family**

|                    | Freq. | %      |
|--------------------|-------|--------|
| 0 No               | 27    | 67.50  |
| 3 His/her Children | 13    | 32.50  |
| Total              | 40    | 100.00 |

**db029\_5\_\_s1: Who Help in Person from Sibling[5]'s Family**

|                   | Freq. | %      |
|-------------------|-------|--------|
| 0 No              | 1     | 3.45   |
| 1 Himself/herself | 28    | 96.55  |
| Total             | 29    | 100.00 |

**db029\_5\_\_s2: Who Help in Person from Sibling[5]'s Family**

|                  | Freq. | %      |
|------------------|-------|--------|
| 0 No             | 13    | 44.83  |
| 2 His/her Spouse | 16    | 55.17  |
| Total            | 29    | 100.00 |

**db029\_5\_\_s3: Who Help in Person from Sibling[5]'s Family**

|                    | Freq. | %      |
|--------------------|-------|--------|
| 0 No               | 18    | 62.07  |
| 3 His/her Children | 11    | 37.93  |
| Total              | 29    | 100.00 |

**db029\_6\_\_s1: Who Help in Person from Sibling[6]'s Family**

|                   | Freq. | %      |
|-------------------|-------|--------|
| 1 Himself/herself | 19    | 100.00 |
| Total             | 19    | 100.00 |

**db029\_6\_\_s2: Who Help in Person from Sibling[6]'s Family**

|                  | Freq. | %      |
|------------------|-------|--------|
| 0 No             | 7     | 36.84  |
| 2 His/her Spouse | 12    | 63.16  |
| Total            | 19    | 100.00 |

**db029\_6\_\_s3: Who Help in Person from Sibling[6]'s Family**

|                    | Freq. | %      |
|--------------------|-------|--------|
| 0 No               | 10    | 52.63  |
| 3 His/her Children | 9     | 47.37  |
| Total              | 19    | 100.00 |

**db029\_7\_\_s1: Who Help in Person from Sibling[7]'s Family**

|                   | Freq. | %      |
|-------------------|-------|--------|
| 1 Himself/herself | 7     | 100.00 |
| Total             | 7     | 100.00 |

**db029\_7\_\_s2: Who Help in Person from Sibling[7]'s Family**

|                  | Freq. | %      |
|------------------|-------|--------|
| 0 No             | 3     | 42.86  |
| 2 His/her Spouse | 4     | 57.14  |
| Total            | 7     | 100.00 |

**db029\_7\_\_s3: Who Help in Person from Sibling[7]'s Family**

|                    | Freq. | %      |
|--------------------|-------|--------|
| 0 No               | 3     | 42.86  |
| 3 His/her Children | 4     | 57.14  |
| Total              | 7     | 100.00 |

**db029\_8\_\_s1: Who Help in Person from Sibling[8]'s Family**

|                   | Freq. | %      |
|-------------------|-------|--------|
| 1 Himself/herself | 1     | 100.00 |
| Total             | 1     | 100.00 |

**db029\_8\_\_s2: Who Help in Person from Sibling[8]'s Family**

|                  | Freq. | %      |
|------------------|-------|--------|
| 2 His/her Spouse | 1     | 100.00 |
| Total            | 1     | 100.00 |

**db029\_8\_\_s3: Who Help in Person from Sibling[8]'s Family**

|       | Freq. | %      |
|-------|-------|--------|
| 0 No  | 1     | 100.00 |
| Total | 1     | 100.00 |

**db029\_9\_\_s1: Who Help in Person from Sibling[9]'s Family**

|                   | Freq. | %      |
|-------------------|-------|--------|
| 1 Himself/herself | 1     | 100.00 |
| Total             | 1     | 100.00 |

**db029\_9\_\_s2: Who Help in Person from Sibling[9]'s Family**

|                  | Freq. | %      |
|------------------|-------|--------|
| 2 His/her Spouse | 1     | 100.00 |
| Total            | 1     | 100.00 |

**db029\_9\_\_s3: Who Help in Person from Sibling[9]'s Family**

|       | Freq. | %      |
|-------|-------|--------|
| 0 No  | 1     | 100.00 |
| Total | 1     | 100.00 |

**db029\_10\_\_s1: Who Help in Person from Sibling[10]'s Family**

|                 |
|-----------------|
| No Observations |
|-----------------|

**db029\_10\_\_s2: Who Help in Person from Sibling[10]'s Family**

|                 |
|-----------------|
| No Observations |
|-----------------|

**db029\_10\_\_s3: Who Help in Person from Sibling[10]'s Family**

|                 |
|-----------------|
| No Observations |
|-----------------|



db029\_11\_\_s1: Who Help in Person from Sibling[11]'s Family

No Observations

db029\_11\_\_s2: Who Help in Person from Sibling[11]'s Family

No Observations

db029\_11\_\_s3: Who Help in Person from Sibling[11]'s Family

No Observations

db029\_12\_\_s1: Who Help in Person from Sibling[12]'s Family

No Observations

db029\_12\_\_s2: Who Help in Person from Sibling[12]'s Family

No Observations

db029\_12\_\_s3: Who Help in Person from Sibling[12]'s Family

No Observations

db029\_13\_\_s1: Who Help in Person from Sibling[13]'s Family

No Observations

db029\_13\_\_s2: Who Help in Person from Sibling[13]'s Family

No Observations

db029\_13\_\_s3: Who Help in Person from Sibling[13]'s Family

No Observations

db029\_14\_\_s1: Who Help in Person from Sibling[14]'s Family

No Observations

db029\_14\_\_s2: Who Help in Person from Sibling[14]'s Family

No Observations

db029\_14\_\_s3: Who Help in Person from Sibling[14]'s Family

No Observations

**db029\_15\_\_s1: Who Help in Person from Sibling[15]'s Family**

|                 |
|-----------------|
| No Observations |
|-----------------|

**db029\_15\_\_s2: Who Help in Person from Sibling[15]'s Family**

|                 |
|-----------------|
| No Observations |
|-----------------|

**db029\_15\_\_s3: Who Help in Person from Sibling[15]'s Family**

|                 |
|-----------------|
| No Observations |
|-----------------|

**db029\_16\_\_s1: Who Help in Person from Sibling[16]'s Family**

|                   | Freq. | %      |
|-------------------|-------|--------|
| 0 No              | 3     | 12.00  |
| 1 Himself/herself | 22    | 88.00  |
| Total             | 25    | 100.00 |

**db029\_16\_\_s2: Who Help in Person from Sibling[16]'s Family**

|                  | Freq. | %      |
|------------------|-------|--------|
| 0 No             | 14    | 56.00  |
| 2 His/her Spouse | 11    | 44.00  |
| Total            | 25    | 100.00 |

**db029\_16\_\_s3: Who Help in Person from Sibling[16]'s Family**

|                    | Freq. | %      |
|--------------------|-------|--------|
| 0 No               | 12    | 48.00  |
| 3 His/her Children | 13    | 52.00  |
| Total              | 25    | 100.00 |

**db029\_17\_\_s1: Who Help in Person from Sibling[17]'s Family**

|                   | Freq. | %      |
|-------------------|-------|--------|
| 0 No              | 7     | 22.58  |
| 1 Himself/herself | 24    | 77.42  |
| Total             | 31    | 100.00 |

**db029\_17\_\_s2: Who Help in Person from Sibling[17]'s Family**

|                  | Freq. | %      |
|------------------|-------|--------|
| 0 No             | 20    | 64.52  |
| 2 His/her Spouse | 11    | 35.48  |
| Total            | 31    | 100.00 |

**db029\_17\_\_s3: Who Help in Person from Sibling[17]'s Family**

|                    | Freq. | %      |
|--------------------|-------|--------|
| 0 No               | 15    | 48.39  |
| 3 His/her Children | 16    | 51.61  |
| Total              | 31    | 100.00 |

**db029\_18\_\_s1: Who Help in Person from Sibling[18]'s Family**

|                   | Freq. | %      |
|-------------------|-------|--------|
| 0 No              | 1     | 3.13   |
| 1 Himself/herself | 31    | 96.88  |
| Total             | 32    | 100.00 |

**db029\_18\_\_s2: Who Help in Person from Sibling[18]'s Family**

|                  | Freq. | %      |
|------------------|-------|--------|
| 0 No             | 14    | 43.75  |
| 2 His/her Spouse | 18    | 56.25  |
| Total            | 32    | 100.00 |

**db029\_18\_\_s3: Who Help in Person from Sibling[18]'s Family**

|                    | Freq. | %      |
|--------------------|-------|--------|
| 0 No               | 16    | 50.00  |
| 3 His/her Children | 16    | 50.00  |
| Total              | 32    | 100.00 |

**db029\_19\_\_s1: Who Help in Person from Sibling[19]'s Family**

|                   | Freq. | %      |
|-------------------|-------|--------|
| 0 No              | 1     | 5.00   |
| 1 Himself/herself | 19    | 95.00  |
| Total             | 20    | 100.00 |

**db029\_19\_\_s2: Who Help in Person from Sibling[19]'s Family**

|                  | Freq. | %      |
|------------------|-------|--------|
| 0 No             | 8     | 40.00  |
| 2 His/her Spouse | 12    | 60.00  |
| Total            | 20    | 100.00 |

**db029\_19\_\_s3: Who Help in Person from Sibling[19]'s Family**

|                    | Freq. | %      |
|--------------------|-------|--------|
| 0 No               | 11    | 55.00  |
| 3 His/her Children | 9     | 45.00  |
| Total              | 20    | 100.00 |

**db029\_20\_\_s1: Who Help in Person from Sibling[20]'s Family**

|                   | Freq. | %      |
|-------------------|-------|--------|
| 1 Himself/herself | 5     | 100.00 |
| Total             | 5     | 100.00 |

**db029\_20\_\_s2: Who Help in Person from Sibling[20]'s Family**

|                  | Freq. | %      |
|------------------|-------|--------|
| 2 His/her Spouse | 5     | 100.00 |
| Total            | 5     | 100.00 |

**db029\_20\_\_s3: Who Help in Person from Sibling[20]'s Family**

|                    | Freq. | %      |
|--------------------|-------|--------|
| 0 No               | 2     | 40.00  |
| 3 His/her Children | 3     | 60.00  |
| Total              | 5     | 100.00 |

**db029\_21\_\_s1: Who Help in Person from Sibling[21]'s Family**

|                   | Freq. | %      |
|-------------------|-------|--------|
| 0 No              | 1     | 25.00  |
| 1 Himself/herself | 3     | 75.00  |
| Total             | 4     | 100.00 |

**db029\_21\_\_s2: Who Help in Person from Sibling[21]'s Family**

|                  | Freq. | %      |
|------------------|-------|--------|
| 0 No             | 1     | 25.00  |
| 2 His/her Spouse | 3     | 75.00  |
| Total            | 4     | 100.00 |

**db029\_21\_\_s3: Who Help in Person from Sibling[21]'s Family**

|                    | Freq. | %      |
|--------------------|-------|--------|
| 0 No               | 2     | 50.00  |
| 3 His/her Children | 2     | 50.00  |
| Total              | 4     | 100.00 |

**db029\_22\_\_s1: Who Help in Person from Sibling[22]'s Family**

|                   | Freq. | %      |
|-------------------|-------|--------|
| 1 Himself/herself | 3     | 100.00 |
| Total             | 3     | 100.00 |

**db029\_22\_\_s2: Who Help in Person from Sibling[22]'s Family**

|  | Freq. | % |
|--|-------|---|
|--|-------|---|

|                  |   |        |
|------------------|---|--------|
| 0 No             | 1 | 33.33  |
| 2 His/her Spouse | 2 | 66.67  |
| Total            | 3 | 100.00 |

**db029\_22\_\_s3: Who Help in Person from Sibling[22]'s Family**

|                    | Freq. | %      |
|--------------------|-------|--------|
| 0 No               | 1     | 33.33  |
| 3 His/her Children | 2     | 66.67  |
| Total              | 3     | 100.00 |

**db029\_23\_\_s1: Who Help in Person from Sibling[23]'s Family**

|                 |
|-----------------|
| No Observations |
|-----------------|

**db029\_23\_\_s2: Who Help in Person from Sibling[23]'s Family**

|                 |
|-----------------|
| No Observations |
|-----------------|

**db029\_23\_\_s3: Who Help in Person from Sibling[23]'s Family**

|                 |
|-----------------|
| No Observations |
|-----------------|

**db029\_24\_\_s1: Who Help in Person from Sibling[24]'s Family**

|                 |
|-----------------|
| No Observations |
|-----------------|

**db029\_24\_\_s2: Who Help in Person from Sibling[24]'s Family**

|                 |
|-----------------|
| No Observations |
|-----------------|

**db029\_24\_\_s3: Who Help in Person from Sibling[24]'s Family**

|                 |
|-----------------|
| No Observations |
|-----------------|

**db029\_25\_\_s1: Who Help in Person from Sibling[25]'s Family**

|                 |
|-----------------|
| No Observations |
|-----------------|

**db029\_25\_\_s2: Who Help in Person from Sibling[25]'s Family**

|                 |
|-----------------|
| No Observations |
|-----------------|

**db029\_25\_\_s3: Who Help in Person from Sibling[25]'s Family**

|                 |
|-----------------|
| No Observations |
|-----------------|

db029\_26\_\_s1: Who Help in Person from Sibling[26]'s Family

---

No Observations

---

db029\_26\_\_s2: Who Help in Person from Sibling[26]'s Family

---

No Observations

---

db029\_26\_\_s3: Who Help in Person from Sibling[26]'s Family

---

No Observations

---

db029\_27\_\_s1: Who Help in Person from Sibling[27]'s Family

---

No Observations

---

db029\_27\_\_s2: Who Help in Person from Sibling[27]'s Family

---

No Observations

---

db029\_27\_\_s3: Who Help in Person from Sibling[27]'s Family

---

No Observations

---

db029\_28\_\_s1: Who Help in Person from Sibling[28]'s Family

---

No Observations

---

db029\_28\_\_s2: Who Help in Person from Sibling[28]'s Family

---

No Observations

---

db029\_28\_\_s3: Who Help in Person from Sibling[28]'s Family

---

No Observations

---

db029\_29\_\_s1: Who Help in Person from Sibling[29]'s Family

---

No Observations

---

db029\_29\_\_s2: Who Help in Person from Sibling[29]'s Family

---

No Observations

---

db029\_29\_\_s3: Who Help in Person from Sibling[29]'s Family

---

No Observations

---

**db029\_30\_\_s1: Who Help in Person from Sibling[30]'s Family**

|                 |
|-----------------|
| No Observations |
|-----------------|

**db029\_30\_\_s2: Who Help in Person from Sibling[30]'s Family**

|                 |
|-----------------|
| No Observations |
|-----------------|

**db029\_30\_\_s3: Who Help in Person from Sibling[30]'s Family**

|                 |
|-----------------|
| No Observations |
|-----------------|

**db029\_31\_\_s1: Who Help in Person from Sibling[31]'s Family**

|                   | Freq. | %      |
|-------------------|-------|--------|
| 0 No              | 5     | 25.00  |
| 1 Himself/herself | 15    | 75.00  |
| Total             | 20    | 100.00 |

**db029\_31\_\_s2: Who Help in Person from Sibling[31]'s Family**

|                  | Freq. | %      |
|------------------|-------|--------|
| 0 No             | 13    | 65.00  |
| 2 His/her Spouse | 7     | 35.00  |
| Total            | 20    | 100.00 |

**db029\_31\_\_s3: Who Help in Person from Sibling[31]'s Family**

|                    | Freq. | %      |
|--------------------|-------|--------|
| 0 No               | 13    | 65.00  |
| 3 His/her Children | 7     | 35.00  |
| Total              | 20    | 100.00 |

**db029\_32\_\_s1: Who Help in Person from Sibling[32]'s Family**

|                   | Freq. | %      |
|-------------------|-------|--------|
| 0 No              | 2     | 50.00  |
| 1 Himself/herself | 2     | 50.00  |
| Total             | 4     | 100.00 |

**db029\_32\_\_s2: Who Help in Person from Sibling[32]'s Family**

|                  | Freq. | %      |
|------------------|-------|--------|
| 0 No             | 3     | 75.00  |
| 2 His/her Spouse | 1     | 25.00  |
| Total            | 4     | 100.00 |

**db029\_32\_\_s3: Who Help in Person from Sibling[32]'s Family**

|                    | Freq. | %      |
|--------------------|-------|--------|
| 0 No               | 3     | 75.00  |
| 3 His/her Children | 1     | 25.00  |
| Total              | 4     | 100.00 |

**db029\_33\_\_s1: Who Help in Person from Sibling[33]'s Family**

|                   | Freq. | %      |
|-------------------|-------|--------|
| 1 Himself/herself | 1     | 100.00 |
| Total             | 1     | 100.00 |

**db029\_33\_\_s2: Who Help in Person from Sibling[33]'s Family**

|                  | Freq. | %      |
|------------------|-------|--------|
| 2 His/her Spouse | 1     | 100.00 |
| Total            | 1     | 100.00 |

**db029\_33\_\_s3: Who Help in Person from Sibling[33]'s Family**

|                    | Freq. | %      |
|--------------------|-------|--------|
| 3 His/her Children | 1     | 100.00 |
| Total              | 1     | 100.00 |

**db029\_34\_\_s1: Who Help in Person from Sibling[34]'s Family**

|                   | Freq. | %      |
|-------------------|-------|--------|
| 1 Himself/herself | 1     | 100.00 |
| Total             | 1     | 100.00 |

**db029\_34\_\_s2: Who Help in Person from Sibling[34]'s Family**

|                  | Freq. | %      |
|------------------|-------|--------|
| 2 His/her Spouse | 1     | 100.00 |
| Total            | 1     | 100.00 |

**db029\_34\_\_s3: Who Help in Person from Sibling[34]'s Family**

|                    | Freq. | %      |
|--------------------|-------|--------|
| 3 His/her Children | 1     | 100.00 |
| Total              | 1     | 100.00 |

**db029\_35\_\_s1: Who Help in Person from Sibling[35]'s Family**

|                 |  |  |
|-----------------|--|--|
| No Observations |  |  |
|-----------------|--|--|

**db029\_35\_\_s2: Who Help in Person from Sibling[35]'s Family**



---

No Observations

---

db029\_35\_\_s3: Who Help in Person from Sibling[35]'s Family

---

No Observations

---

db029\_36\_\_s1: Who Help in Person from Sibling[36]'s Family

---

No Observations

---

db029\_36\_\_s2: Who Help in Person from Sibling[36]'s Family

---

No Observations

---

db029\_36\_\_s3: Who Help in Person from Sibling[36]'s Family

---

No Observations

---

db029\_37\_\_s1: Who Help in Person from Sibling[37]'s Family

---

No Observations

---

db029\_37\_\_s2: Who Help in Person from Sibling[37]'s Family

---

No Observations

---

db029\_37\_\_s3: Who Help in Person from Sibling[37]'s Family

---

No Observations

---

db029\_38\_\_s1: Who Help in Person from Sibling[38]'s Family

---

No Observations

---

db029\_38\_\_s2: Who Help in Person from Sibling[38]'s Family

---

No Observations

---

db029\_38\_\_s3: Who Help in Person from Sibling[38]'s Family

---

No Observations

---

db029\_39\_\_s1: Who Help in Person from Sibling[39]'s Family

---

No Observations

---

**db029\_39\_\_s2: Who Help in Person from Sibling[39]'s Family**

|                 |
|-----------------|
| No Observations |
|-----------------|

**db029\_39\_\_s3: Who Help in Person from Sibling[39]'s Family**

|                 |
|-----------------|
| No Observations |
|-----------------|

**db029\_40\_\_s1: Who Help in Person from Sibling[40]'s Family**

|                 |
|-----------------|
| No Observations |
|-----------------|

**db029\_40\_\_s2: Who Help in Person from Sibling[40]'s Family**

|                 |
|-----------------|
| No Observations |
|-----------------|

**db029\_40\_\_s3: Who Help in Person from Sibling[40]'s Family**

|                 |
|-----------------|
| No Observations |
|-----------------|

**db029\_1\_1\_: Number of Children Helped**

| Mean | SD   | Min  | Max   | Obs |
|------|------|------|-------|-----|
| 2.19 | 2.24 | 1.00 | 10.00 | 27  |

**db029\_1\_2\_: Number of Children Helped**

| Mean | SD   | Min  | Max  | Obs |
|------|------|------|------|-----|
| 2.08 | 1.32 | 1.00 | 7.00 | 24  |

**db029\_1\_3\_: Number of Children Helped**

| Mean | SD   | Min  | Max  | Obs |
|------|------|------|------|-----|
| 1.79 | 0.71 | 1.00 | 3.00 | 19  |

**db029\_1\_4\_: Number of Children Helped**

| Mean | SD   | Min  | Max  | Obs |
|------|------|------|------|-----|
| 2.15 | 1.07 | 1.00 | 5.00 | 13  |

**db029\_1\_5\_: Number of Children Helped**

| Mean | SD   | Min  | Max  | Obs |
|------|------|------|------|-----|
| 2.00 | 0.77 | 1.00 | 3.00 | 11  |

**db029\_1\_6\_: Number of Children Helped**

| Mean | SD   | Min  | Max  | Obs |
|------|------|------|------|-----|
| 2.00 | 0.71 | 1.00 | 3.00 | 9   |

db029\_1\_7\_: Number of Children Helped

| Mean | SD   | Min  | Max  | Obs |
|------|------|------|------|-----|
| 2.75 | 0.96 | 2.00 | 4.00 | 4   |

db029\_1\_8\_: Number of Children Helped

|                 |
|-----------------|
| No Observations |
|-----------------|

db029\_1\_9\_: Number of Children Helped

|                 |
|-----------------|
| No Observations |
|-----------------|

db029\_1\_10\_: Number of Children Helped

|                 |
|-----------------|
| No Observations |
|-----------------|

db029\_1\_11\_: Number of Children Helped

|                 |
|-----------------|
| No Observations |
|-----------------|

db029\_1\_12\_: Number of Children Helped

|                 |
|-----------------|
| No Observations |
|-----------------|

db029\_1\_13\_: Number of Children Helped

|                 |
|-----------------|
| No Observations |
|-----------------|

db029\_1\_14\_: Number of Children Helped

|                 |
|-----------------|
| No Observations |
|-----------------|

db029\_1\_15\_: Number of Children Helped

|                 |
|-----------------|
| No Observations |
|-----------------|

db029\_1\_16\_: Number of Children Helped

| Mean | SD   | Min  | Max  | Obs |
|------|------|------|------|-----|
| 2.77 | 1.59 | 1.00 | 6.00 | 13  |

**db029\_1\_17\_:** Number of Children Helped

| Mean | SD   | Min   | Max  | Obs |
|------|------|-------|------|-----|
| 1.88 | 1.63 | -1.00 | 6.00 | 16  |

**db029\_1\_18\_:** Number of Children Helped

| Mean | SD   | Min  | Max  | Obs |
|------|------|------|------|-----|
| 2.13 | 0.96 | 1.00 | 4.00 | 16  |

**db029\_1\_19\_:** Number of Children Helped

| Mean | SD   | Min  | Max  | Obs |
|------|------|------|------|-----|
| 2.11 | 0.78 | 1.00 | 3.00 | 9   |

**db029\_1\_20\_:** Number of Children Helped

| Mean | SD   | Min  | Max  | Obs |
|------|------|------|------|-----|
| 3.00 | 1.73 | 2.00 | 5.00 | 3   |

**db029\_1\_21\_:** Number of Children Helped

| Mean | SD   | Min  | Max  | Obs |
|------|------|------|------|-----|
| 2.50 | 2.12 | 1.00 | 4.00 | 2   |

**db029\_1\_22\_:** Number of Children Helped

| Mean | SD   | Min  | Max  | Obs |
|------|------|------|------|-----|
| 3.00 | 1.41 | 2.00 | 4.00 | 2   |

**db029\_1\_23\_:** Number of Children Helped

|                 |  |  |  |  |
|-----------------|--|--|--|--|
| No Observations |  |  |  |  |
|-----------------|--|--|--|--|

**db029\_1\_24\_:** Number of Children Helped

|                 |  |  |  |  |
|-----------------|--|--|--|--|
| No Observations |  |  |  |  |
|-----------------|--|--|--|--|

**db029\_1\_25\_:** Number of Children Helped

|                 |  |  |  |  |
|-----------------|--|--|--|--|
| No Observations |  |  |  |  |
|-----------------|--|--|--|--|

**db029\_1\_26\_:** Number of Children Helped

|                 |  |  |  |  |
|-----------------|--|--|--|--|
| No Observations |  |  |  |  |
|-----------------|--|--|--|--|

db029\_1\_27\_: Number of Children Helped

|                 |
|-----------------|
| No Observations |
|-----------------|

db029\_1\_28\_: Number of Children Helped

|                 |
|-----------------|
| No Observations |
|-----------------|

db029\_1\_29\_: Number of Children Helped

|                 |
|-----------------|
| No Observations |
|-----------------|

db029\_1\_30\_: Number of Children Helped

|                 |
|-----------------|
| No Observations |
|-----------------|

db029\_1\_31\_: Number of Children Helped

| Mean | SD   | Min  | Max  | Obs |
|------|------|------|------|-----|
| 2.29 | 1.89 | 1.00 | 5.00 | 7   |

db029\_1\_32\_: Number of Children Helped

| Mean | SD | Min  | Max  | Obs |
|------|----|------|------|-----|
| 1.00 | .  | 1.00 | 1.00 | 1   |

db029\_1\_33\_: Number of Children Helped

| Mean | SD | Min  | Max  | Obs |
|------|----|------|------|-----|
| 2.00 | .  | 2.00 | 2.00 | 1   |

db029\_1\_34\_: Number of Children Helped

| Mean | SD | Min  | Max  | Obs |
|------|----|------|------|-----|
| 2.00 | .  | 2.00 | 2.00 | 1   |

db029\_1\_35\_: Number of Children Helped

|                 |
|-----------------|
| No Observations |
|-----------------|

db029\_1\_36\_: Number of Children Helped

|                 |
|-----------------|
| No Observations |
|-----------------|

db029\_1\_37\_: Number of Children Helped

---

No Observations

---

**db029\_1\_38\_:** Number of Children Helped

---

No Observations

---

**db029\_1\_39\_:** Number of Children Helped

---

No Observations

---

**db029\_1\_40\_:** Number of Children Helped

---

No Observations

---

**db030:** Number of Relatives Help in Person

| Mean | SD   | Min   | Max   | Obs |
|------|------|-------|-------|-----|
| 2.67 | 3.51 | -1.00 | 20.00 | 54  |

**db031:** Number of Others Who Help in Person

| Mean | SD   | Min   | Max   | Obs |
|------|------|-------|-------|-----|
| 2.32 | 5.34 | -1.00 | 70.00 | 224 |

**db032\_s1:** Choose Most Important 7 Helpers

|             | Freq. | %      |
|-------------|-------|--------|
| 0 No        | 24    | 9.72   |
| 1 Helper[1] | 223   | 90.28  |
| Total       | 247   | 100.00 |

**db032\_s2:** Choose Most Important 7 Helpers

|             | Freq. | %      |
|-------------|-------|--------|
| 0 No        | 48    | 19.43  |
| 2 Helper[2] | 199   | 80.57  |
| Total       | 247   | 100.00 |

**db032\_s3:** Choose Most Important 7 Helpers

|             | Freq. | %      |
|-------------|-------|--------|
| 0 No        | 84    | 34.01  |
| 3 Helper[3] | 163   | 65.99  |
| Total       | 247   | 100.00 |

**db032\_s4:** Choose Most Important 7 Helpers

|             | Freq. | %      |
|-------------|-------|--------|
| 0 No        | 68    | 27.53  |
| 4 Helper[4] | 179   | 72.47  |
| Total       | 247   | 100.00 |

**db032\_s5: Choose Most Important 7 Helpers**

|             | Freq. | %      |
|-------------|-------|--------|
| 0 No        | 56    | 22.67  |
| 5 Helper[5] | 191   | 77.33  |
| Total       | 247   | 100.00 |

**db032\_s6: Choose Most Important 7 Helpers**

|             | Freq. | %      |
|-------------|-------|--------|
| 0 No        | 103   | 41.70  |
| 6 Helper[6] | 144   | 58.30  |
| Total       | 247   | 100.00 |

**db032\_s7: Choose Most Important 7 Helpers**

|             | Freq. | %      |
|-------------|-------|--------|
| 0 No        | 81    | 32.79  |
| 7 Helper[7] | 166   | 67.21  |
| Total       | 247   | 100.00 |

**db032\_s8: Choose Most Important 7 Helpers**

|             | Freq. | %      |
|-------------|-------|--------|
| 0 No        | 106   | 42.91  |
| 8 Helper[8] | 141   | 57.09  |
| Total       | 247   | 100.00 |

**db032\_s9: Choose Most Important 7 Helpers**

|             | Freq. | %      |
|-------------|-------|--------|
| 0 No        | 156   | 63.16  |
| 9 Helper[9] | 91    | 36.84  |
| Total       | 247   | 100.00 |

**db032\_s10: Choose Most Important 7 Helpers**

|               | Freq. | %      |
|---------------|-------|--------|
| 0 No          | 175   | 70.85  |
| 10 Helper[10] | 72    | 29.15  |
| Total         | 247   | 100.00 |

**db032\_s11: Choose Most Important 7 Helpers**

|               | Freq. | %      |
|---------------|-------|--------|
| 0 No          | 199   | 80.57  |
| 11 Helper[11] | 48    | 19.43  |
| Total         | 247   | 100.00 |

**db032\_s12: Choose Most Important 7 Helpers**

|               | Freq. | %      |
|---------------|-------|--------|
| 0 No          | 221   | 89.47  |
| 12 Helper[12] | 26    | 10.53  |
| Total         | 247   | 100.00 |

**db032\_s13: Choose Most Important 7 Helpers**

|               | Freq. | %      |
|---------------|-------|--------|
| 0 No          | 226   | 91.50  |
| 13 Helper[13] | 21    | 8.50   |
| Total         | 247   | 100.00 |

**db032\_s14: Choose Most Important 7 Helpers**

|               | Freq. | %      |
|---------------|-------|--------|
| 0 No          | 225   | 91.09  |
| 14 Helper[14] | 22    | 8.91   |
| Total         | 247   | 100.00 |

**db032\_s15: Choose Most Important 7 Helpers**

|               | Freq. | %      |
|---------------|-------|--------|
| 0 No          | 234   | 94.74  |
| 15 Helper[15] | 13    | 5.26   |
| Total         | 247   | 100.00 |

**db032\_s16: Choose Most Important 7 Helpers**

|               | Freq. | %      |
|---------------|-------|--------|
| 0 No          | 237   | 95.95  |
| 16 Helper[16] | 10    | 4.05   |
| Total         | 247   | 100.00 |

**db032\_s17: Choose Most Important 7 Helpers**

|               | Freq. | %      |
|---------------|-------|--------|
| 0 No          | 240   | 97.17  |
| 17 Helper[17] | 7     | 2.83   |
| Total         | 247   | 100.00 |

**db032\_s18: Choose Most Important 7 Helpers**



|               | Freq. | %      |
|---------------|-------|--------|
| 0 No          | 244   | 98.79  |
| 18 Helper[18] | 3     | 1.21   |
| Total         | 247   | 100.00 |

## db032\_s19: Choose Most Important 7 Helpers

|               | Freq. | %      |
|---------------|-------|--------|
| 0 No          | 242   | 97.98  |
| 19 Helper[19] | 5     | 2.02   |
| Total         | 247   | 100.00 |

## db032\_s20: Choose Most Important 7 Helpers

|               | Freq. | %      |
|---------------|-------|--------|
| 0 No          | 244   | 98.79  |
| 20 Helper[20] | 3     | 1.21   |
| Total         | 247   | 100.00 |

## db032\_s21: Choose Most Important 7 Helpers

|       | Freq. | %      |
|-------|-------|--------|
| 0 No  | 247   | 100.00 |
| Total | 247   | 100.00 |

## db032\_s22: Choose Most Important 7 Helpers

|               | Freq. | %      |
|---------------|-------|--------|
| 0 No          | 246   | 99.60  |
| 22 Helper[22] | 1     | 0.40   |
| Total         | 247   | 100.00 |

## db032\_s23: Choose Most Important 7 Helpers

|       | Freq. | %      |
|-------|-------|--------|
| 0 No  | 247   | 100.00 |
| Total | 247   | 100.00 |

## db032\_s24: Choose Most Important 7 Helpers

|       | Freq. | %      |
|-------|-------|--------|
| 0 No  | 247   | 100.00 |
| Total | 247   | 100.00 |

## db032\_s25: Choose Most Important 7 Helpers

|  | Freq. | % |
|--|-------|---|
|--|-------|---|

|               |     |        |
|---------------|-----|--------|
| 0 No          | 246 | 99.60  |
| 25 Helper[25] | 1   | 0.40   |
| Total         | 247 | 100.00 |

**db033\_1\_:** Days Helper[1] Helped

| Mean  | SD    | Min   | Max   | Obs   |
|-------|-------|-------|-------|-------|
| 18.78 | 13.10 | -1.00 | 31.00 | 3,443 |

**db033\_2\_:** Days Helper[2] Helped

| Mean  | SD    | Min   | Max   | Obs   |
|-------|-------|-------|-------|-------|
| 11.67 | 12.48 | -1.00 | 31.00 | 1,647 |

**db033\_3\_:** Days Helper[3] Helped

| Mean | SD    | Min   | Max   | Obs   |
|------|-------|-------|-------|-------|
| 8.71 | 11.36 | -1.00 | 31.00 | 1,080 |

**db033\_4\_:** Days Helper[4] Helped

| Mean | SD    | Min   | Max   | Obs |
|------|-------|-------|-------|-----|
| 7.55 | 10.27 | -1.00 | 31.00 | 731 |

**db033\_5\_:** Days Helper[5] Helped

| Mean | SD   | Min   | Max   | Obs |
|------|------|-------|-------|-----|
| 6.51 | 9.43 | -1.00 | 31.00 | 498 |

**db033\_6\_:** Days Helper[6] Helped

| Mean | SD   | Min   | Max   | Obs |
|------|------|-------|-------|-----|
| 5.66 | 8.81 | -1.00 | 31.00 | 324 |

**db033\_7\_:** Days Helper[7] Helped

| Mean | SD   | Min   | Max   | Obs |
|------|------|-------|-------|-----|
| 5.55 | 8.73 | -1.00 | 31.00 | 233 |

**db033\_8\_:** Days Helper[8] Helped

| Mean | SD   | Min   | Max   | Obs |
|------|------|-------|-------|-----|
| 5.66 | 8.96 | -1.00 | 31.00 | 141 |

**db033\_9\_:** Days Helper[9] Helped

| Mean | SD   | Min   | Max   | Obs |
|------|------|-------|-------|-----|
| 5.87 | 9.03 | -1.00 | 30.00 | 91  |

**db033\_10\_:** Days Helper[10] Helped

| Mean | SD   | Min   | Max   | Obs |
|------|------|-------|-------|-----|
| 4.86 | 8.01 | -1.00 | 30.00 | 72  |

**db033\_11\_:** Days Helper[11] Helped

| Mean | SD   | Min   | Max   | Obs |
|------|------|-------|-------|-----|
| 5.42 | 8.63 | -1.00 | 31.00 | 48  |

**db033\_12\_:** Days Helper[12] Helped

| Mean | SD    | Min  | Max   | Obs |
|------|-------|------|-------|-----|
| 7.73 | 10.75 | 0.00 | 30.00 | 26  |

**db033\_13\_:** Days Helper[13] Helped

| Mean | SD    | Min   | Max   | Obs |
|------|-------|-------|-------|-----|
| 9.29 | 11.85 | -1.00 | 30.00 | 21  |

**db033\_14\_:** Days Helper[14] Helped

| Mean | SD   | Min   | Max   | Obs |
|------|------|-------|-------|-----|
| 6.95 | 9.05 | -1.00 | 30.00 | 22  |

**db033\_15\_:** Days Helper[15] Helped

| Mean  | SD    | Min  | Max   | Obs |
|-------|-------|------|-------|-----|
| 10.08 | 10.41 | 0.00 | 30.00 | 13  |

**db033\_16\_:** Days Helper[16] Helped

| Mean  | SD    | Min  | Max   | Obs |
|-------|-------|------|-------|-----|
| 11.80 | 13.34 | 0.00 | 30.00 | 10  |

**db033\_17\_:** Days Helper[17] Helped

| Mean | SD    | Min  | Max   | Obs |
|------|-------|------|-------|-----|
| 5.00 | 11.18 | 0.00 | 30.00 | 7   |

**db033\_18\_:** Days Helper[18] Helped

| Mean  | SD    | Min  | Max   | Obs |
|-------|-------|------|-------|-----|
| 12.00 | 15.72 | 1.00 | 30.00 | 3   |

#### db033\_19\_: Days Helper[19] Helped

| Mean | SD   | Min  | Max  | Obs |
|------|------|------|------|-----|
| 1.40 | 1.34 | 0.00 | 3.00 | 5   |

#### db033\_20\_: Days Helper[20] Helped

| Mean | SD   | Min  | Max  | Obs |
|------|------|------|------|-----|
| 2.67 | 1.53 | 1.00 | 4.00 | 3   |

#### db033\_21\_: Days Helper[21] Helped

|                 |  |  |  |  |
|-----------------|--|--|--|--|
| No Observations |  |  |  |  |
|-----------------|--|--|--|--|

#### db033\_22\_: Days Helper[22] Helped

| Mean | SD | Min  | Max  | Obs |
|------|----|------|------|-----|
| 3.00 | .  | 3.00 | 3.00 | 1   |

#### db033\_23\_: Days Helper[23] Helped

|                 |  |  |  |  |
|-----------------|--|--|--|--|
| No Observations |  |  |  |  |
|-----------------|--|--|--|--|

#### db033\_24\_: Days Helper[24] Helped

|                 |  |  |  |  |
|-----------------|--|--|--|--|
| No Observations |  |  |  |  |
|-----------------|--|--|--|--|

#### db033\_25\_: Days Helper[25] Helped

| Mean | SD | Min  | Max  | Obs |
|------|----|------|------|-----|
| 3.00 | .  | 3.00 | 3.00 | 1   |

#### db034\_1\_: Hours Helper[1] Helped

| Mean | SD   | Min   | Max   | Obs   |
|------|------|-------|-------|-------|
| 3.32 | 5.61 | -1.00 | 24.00 | 3,443 |

#### db034\_2\_: Hours Helper[2] Helped

| Mean | SD   | Min   | Max   | Obs   |
|------|------|-------|-------|-------|
| 3.02 | 5.12 | -1.00 | 24.00 | 1,647 |

**db034\_3\_:** Hours Helper[3] Helped

| Mean | SD   | Min   | Max   | Obs   |
|------|------|-------|-------|-------|
| 2.69 | 4.65 | -1.00 | 24.00 | 1,080 |

**db034\_4\_:** Hours Helper[4] Helped

| Mean | SD   | Min   | Max   | Obs |
|------|------|-------|-------|-----|
| 3.01 | 5.08 | -1.00 | 24.00 | 731 |

**db034\_5\_:** Hours Helper[5] Helped

| Mean | SD   | Min   | Max   | Obs |
|------|------|-------|-------|-----|
| 3.01 | 5.05 | -1.00 | 24.00 | 498 |

**db034\_6\_:** Hours Helper[6] Helped

| Mean | SD   | Min   | Max   | Obs |
|------|------|-------|-------|-----|
| 3.24 | 5.52 | -1.00 | 24.00 | 324 |

**db034\_7\_:** Hours Helper[7] Helped

| Mean | SD   | Min   | Max   | Obs |
|------|------|-------|-------|-----|
| 3.47 | 5.56 | -1.00 | 24.00 | 233 |

**db034\_8\_:** Hours Helper[8] Helped

| Mean | SD   | Min   | Max   | Obs |
|------|------|-------|-------|-----|
| 2.89 | 5.20 | -1.00 | 24.00 | 141 |

**db034\_9\_:** Hours Helper[9] Helped

| Mean | SD   | Min   | Max   | Obs |
|------|------|-------|-------|-----|
| 2.57 | 4.38 | -1.00 | 24.00 | 91  |

**db034\_10\_:** Hours Helper[10] Helped

| Mean | SD   | Min   | Max   | Obs |
|------|------|-------|-------|-----|
| 3.17 | 5.64 | -1.00 | 24.00 | 72  |

**db034\_11\_:** Hours Helper[11] Helped

| Mean | SD   | Min   | Max   | Obs |
|------|------|-------|-------|-----|
| 3.02 | 4.88 | -1.00 | 24.00 | 48  |

**db034\_12\_:** Hours Helper[12] Helped

| Mean | SD   | Min  | Max   | Obs |
|------|------|------|-------|-----|
| 3.19 | 3.26 | 0.00 | 15.00 | 26  |

**db034\_13\_:** Hours Helper[13] Helped

| Mean | SD   | Min   | Max   | Obs |
|------|------|-------|-------|-----|
| 3.38 | 5.29 | -1.00 | 24.00 | 21  |

**db034\_14\_:** Hours Helper[14] Helped

| Mean | SD   | Min   | Max   | Obs |
|------|------|-------|-------|-----|
| 2.77 | 5.06 | -1.00 | 24.00 | 22  |

**db034\_15\_:** Hours Helper[15] Helped

| Mean | SD   | Min   | Max  | Obs |
|------|------|-------|------|-----|
| 2.00 | 2.31 | -1.00 | 6.00 | 13  |

**db034\_16\_:** Hours Helper[16] Helped

| Mean | SD   | Min   | Max  | Obs |
|------|------|-------|------|-----|
| 2.10 | 3.00 | -1.00 | 8.00 | 10  |

**db034\_17\_:** Hours Helper[17] Helped

| Mean | SD   | Min   | Max   | Obs |
|------|------|-------|-------|-----|
| 4.71 | 8.75 | -1.00 | 24.00 | 7   |

**db034\_18\_:** Hours Helper[18] Helped

| Mean | SD   | Min  | Max  | Obs |
|------|------|------|------|-----|
| 4.67 | 2.08 | 3.00 | 7.00 | 3   |

**db034\_19\_:** Hours Helper[19] Helped

| Mean | SD   | Min  | Max  | Obs |
|------|------|------|------|-----|
| 3.40 | 3.13 | 0.00 | 8.00 | 5   |

**db034\_20\_:** Hours Helper[20] Helped

| Mean | SD   | Min  | Max  | Obs |
|------|------|------|------|-----|
| 2.67 | 1.15 | 2.00 | 4.00 | 3   |

**db034\_21\_:** Hours Helper[21] Helped

---

No Observations

---

## db034\_22\_: Hours Helper[22] Helped

| Mean | SD | Min  | Max  | Obs |
|------|----|------|------|-----|
| 2.00 | .  | 2.00 | 2.00 | 1   |

---

## db034\_23\_: Hours Helper[23] Helped

---

No Observations

---

## db034\_24\_: Hours Helper[24] Helped

---

No Observations

---

## db034\_25\_: Hours Helper[25] Helped

| Mean | SD | Min  | Max  | Obs |
|------|----|------|------|-----|
| 2.00 | .  | 2.00 | 2.00 | 1   |

---

## db035\_1\_: Helper[1] Living in Your Home

|       | Freq. | %      |
|-------|-------|--------|
| 1 Yes | 2,915 | 84.66  |
| 2 No  | 528   | 15.34  |
| Total | 3,443 | 100.00 |

---

## db035\_2\_: Helper[2] Living in Your Home

|       | Freq. | %      |
|-------|-------|--------|
| 1 Yes | 1,054 | 64.00  |
| 2 No  | 593   | 36.00  |
| Total | 1,647 | 100.00 |

---

## db035\_3\_: Helper[3] Living in Your Home

|       | Freq. | %      |
|-------|-------|--------|
| 1 Yes | 644   | 59.63  |
| 2 No  | 436   | 40.37  |
| Total | 1,080 | 100.00 |

---

## db035\_4\_: Helper[4] Living in Your Home

|       | Freq. | %      |
|-------|-------|--------|
| 1 Yes | 379   | 51.85  |
| 2 No  | 352   | 48.15  |
| Total | 731   | 100.00 |

---

**db035\_5\_:** Helper[5] Living in Your Home

|       | Freq. | %      |
|-------|-------|--------|
| 1 Yes | 225   | 45.18  |
| 2 No  | 273   | 54.82  |
| Total | 498   | 100.00 |

**db035\_6\_:** Helper[6] Living in Your Home

|       | Freq. | %      |
|-------|-------|--------|
| 1 Yes | 134   | 41.36  |
| 2 No  | 190   | 58.64  |
| Total | 324   | 100.00 |

**db035\_7\_:** Helper[7] Living in Your Home

|       | Freq. | %      |
|-------|-------|--------|
| 1 Yes | 107   | 45.92  |
| 2 No  | 126   | 54.08  |
| Total | 233   | 100.00 |

**db035\_8\_:** Helper[8] Living in Your Home

|       | Freq. | %      |
|-------|-------|--------|
| 1 Yes | 48    | 34.04  |
| 2 No  | 93    | 65.96  |
| Total | 141   | 100.00 |

**db035\_9\_:** Helper[9] Living in Your Home

|       | Freq. | %      |
|-------|-------|--------|
| 1 Yes | 36    | 39.56  |
| 2 No  | 55    | 60.44  |
| Total | 91    | 100.00 |

**db035\_10\_:** Helper[10] Living in Your Home

|       | Freq. | %      |
|-------|-------|--------|
| 1 Yes | 26    | 36.11  |
| 2 No  | 46    | 63.89  |
| Total | 72    | 100.00 |

**db035\_11\_:** Helper[11] Living in Your Home

|       | Freq. | %      |
|-------|-------|--------|
| 1 Yes | 19    | 39.58  |
| 2 No  | 29    | 60.42  |
| Total | 48    | 100.00 |



**db035\_12\_:** Helper[12] Living in Your Home

|       | Freq. | %      |
|-------|-------|--------|
| 1 Yes | 7     | 26.92  |
| 2 No  | 19    | 73.08  |
| Total | 26    | 100.00 |

**db035\_13\_:** Helper[13] Living in Your Home

|       | Freq. | %      |
|-------|-------|--------|
| 1 Yes | 7     | 33.33  |
| 2 No  | 14    | 66.67  |
| Total | 21    | 100.00 |

**db035\_14\_:** Helper[14] Living in Your Home

|       | Freq. | %      |
|-------|-------|--------|
| 1 Yes | 10    | 45.45  |
| 2 No  | 12    | 54.55  |
| Total | 22    | 100.00 |

**db035\_15\_:** Helper[15] Living in Your Home

|       | Freq. | %      |
|-------|-------|--------|
| 1 Yes | 7     | 53.85  |
| 2 No  | 6     | 46.15  |
| Total | 13    | 100.00 |

**db035\_16\_:** Helper[16] Living in Your Home

|       | Freq. | %      |
|-------|-------|--------|
| 1 Yes | 5     | 50.00  |
| 2 No  | 5     | 50.00  |
| Total | 10    | 100.00 |

**db035\_17\_:** Helper[17] Living in Your Home

|       | Freq. | %      |
|-------|-------|--------|
| 1 Yes | 2     | 28.57  |
| 2 No  | 5     | 71.43  |
| Total | 7     | 100.00 |

**db035\_18\_:** Helper[18] Living in Your Home

|       | Freq. | %      |
|-------|-------|--------|
| 1 Yes | 1     | 33.33  |
| 2 No  | 2     | 66.67  |
| Total | 3     | 100.00 |

**db035\_19\_:** Helper[19] Living in Your Home

|       | Freq. | %      |
|-------|-------|--------|
| 1 Yes | 1     | 20.00  |
| 2 No  | 4     | 80.00  |
| Total | 5     | 100.00 |

**db035\_20\_:** Helper[20] Living in Your Home

|       | Freq. | %      |
|-------|-------|--------|
| 1 Yes | 1     | 33.33  |
| 2 No  | 2     | 66.67  |
| Total | 3     | 100.00 |

**db035\_21\_:** Helper[21] Living in Your Home

|                 |
|-----------------|
| No Observations |
|-----------------|

**db035\_22\_:** Helper[22] Living in Your Home

|       | Freq. | %      |
|-------|-------|--------|
| 2 No  | 1     | 100.00 |
| Total | 1     | 100.00 |

**db035\_23\_:** Helper[23] Living in Your Home

|                 |
|-----------------|
| No Observations |
|-----------------|

**db035\_24\_:** Helper[24] Living in Your Home

|                 |
|-----------------|
| No Observations |
|-----------------|

**db035\_25\_:** Helper[25] Living in Your Home

|       | Freq. | %      |
|-------|-------|--------|
| 2 No  | 1     | 100.00 |
| Total | 1     | 100.00 |

**db048:** Change of Received Care Because of Pademic

|                | Freq. | %      |
|----------------|-------|--------|
| 1 Become More  | 265   | 7.64   |
| 2 Become Less  | 216   | 6.23   |
| 3 Don't Change | 2,986 | 86.13  |
| Total          | 3,467 | 100.00 |

**db036:** Any Possible Helper in the Future

|       | Freq.  | %      |
|-------|--------|--------|
| 1 Yes | 10,809 | 68.07  |
| 2 No  | 5,070  | 31.93  |
| Total | 15,879 | 100.00 |

## db037\_s1: Helper[1]'s Relationship to You

|          | Freq.  | %      |
|----------|--------|--------|
| 0 No     | 4,820  | 44.59  |
| 1 Spouse | 5,989  | 55.41  |
| Total    | 10,809 | 100.00 |

## db037\_s2: Helper[2]'s Relationship to You

|                                                | Freq.  | %      |
|------------------------------------------------|--------|--------|
| 0 No                                           | 10,753 | 99.48  |
| 2 Father, Mother, Father-in-Law, Mother-in-Law | 56     | 0.52   |
| Total                                          | 10,809 | 100.00 |

## db037\_s3: Helper[3]'s Relationship to You

|                                                        | Freq.  | %      |
|--------------------------------------------------------|--------|--------|
| 0 No                                                   | 1,320  | 12.21  |
| 3 Children, Children's Spouse, Grandson, Granddaughter | 9,489  | 87.79  |
| Total                                                  | 10,809 | 100.00 |

## db037\_s4: Helper[4]'s Relationship to You

|                                                                  | Freq.  | %      |
|------------------------------------------------------------------|--------|--------|
| 0 No                                                             | 10,171 | 94.10  |
| 4 Sibling, Brother-in-Law, Sister-in-Law, Sibling of Spouse, Etc | 638    | 5.90   |
| Total                                                            | 10,809 | 100.00 |

## db037\_s5: Helper[5]'s Relationship to You

|                  | Freq.  | %      |
|------------------|--------|--------|
| 0 No             | 10,693 | 98.93  |
| 5 Other Relative | 116    | 1.07   |
| Total            | 10,809 | 100.00 |

## db037\_s6: Helper[6]'s Relationship to You

|                               | Freq.  | %      |
|-------------------------------|--------|--------|
| 0 No                          | 10,598 | 98.05  |
| 6 Paid Helper (Such as Nanny) | 211    | 1.95   |
| Total                         | 10,809 | 100.00 |

**db037\_s7: Helper[7]'s Relationship to You**

|                                     | Freq.  | %      |
|-------------------------------------|--------|--------|
| 0 No                                | 10,732 | 99.29  |
| 7 Volunteer or Employee of Facility | 77     | 0.71   |
| Total                               | 10,809 | 100.00 |

**db037\_s8: Helper[8]'s Relationship to You**

|                | Freq.  | %      |
|----------------|--------|--------|
| 0 No           | 10,486 | 97.01  |
| 8 Nursing Home | 323    | 2.99   |
| Total          | 10,809 | 100.00 |

**db037\_s9: Helper[9]'s Relationship to You**

|                                         | Freq.  | %      |
|-----------------------------------------|--------|--------|
| 0 No                                    | 10,692 | 98.92  |
| 9 Staff from Home-based Nursing Service | 117    | 1.08   |
| Total                                   | 10,809 | 100.00 |

**db037\_s10: Helper[10]'s Relationship to You**

|                            | Freq.  | %      |
|----------------------------|--------|--------|
| 0 No                       | 10,674 | 98.75  |
| 10 Help from the Community | 135    | 1.25   |
| Total                      | 10,809 | 100.00 |

**db037\_s11: Helper[11]'s Relationship to You**

|                          | Freq.  | %      |
|--------------------------|--------|--------|
| 0 No                     | 10,745 | 99.41  |
| 11 Other, Please Specify | 64     | 0.59   |
| Total                    | 10,809 | 100.00 |

**db037\_1: Number of Paid Helpers**

| Mean | SD   | Min   | Max  | Obs |
|------|------|-------|------|-----|
| 0.90 | 0.55 | -1.00 | 3.00 | 211 |

**db038\_s1: Who Will Help You in Future**

|          | Freq. | %      |
|----------|-------|--------|
| 0 No     | 23    | 41.07  |
| 1 Father | 33    | 58.93  |
| Total    | 56    | 100.00 |

**db038\_s2: Who Will Help You in Future**

|          | Freq. | %      |
|----------|-------|--------|
| 0 No     | 9     | 16.07  |
| 2 Mother | 47    | 83.93  |
| Total    | 56    | 100.00 |

## db038\_s3: Who Will Help You in Future

|                 | Freq. | %      |
|-----------------|-------|--------|
| 0 No            | 38    | 67.86  |
| 3 Father-in-Law | 18    | 32.14  |
| Total           | 56    | 100.00 |

## db038\_s4: Who Will Help You in Future

|                 | Freq. | %      |
|-----------------|-------|--------|
| 0 No            | 30    | 53.57  |
| 4 Mother-in-Law | 26    | 46.43  |
| Total           | 56    | 100.00 |

## db039\_s1: Which Child's Family Will Help You in Future

|                         | Freq. | %      |
|-------------------------|-------|--------|
| 0 No                    | 998   | 10.52  |
| 1 Preload XChildName[1] | 8,491 | 89.48  |
| Total                   | 9,489 | 100.00 |

## db039\_s2: Which Child's Family Will Help You in Future

|                         | Freq. | %      |
|-------------------------|-------|--------|
| 0 No                    | 2,951 | 31.10  |
| 2 Preload XChildName[2] | 6,538 | 68.90  |
| Total                   | 9,489 | 100.00 |

## db039\_s3: Which Child's Family Will Help You in Future

|                         | Freq. | %      |
|-------------------------|-------|--------|
| 0 No                    | 6,459 | 68.07  |
| 3 Preload XChildName[3] | 3,030 | 31.93  |
| Total                   | 9,489 | 100.00 |

## db039\_s4: Which Child's Family Will Help You in Future

|                         | Freq. | %      |
|-------------------------|-------|--------|
| 0 No                    | 8,183 | 86.24  |
| 4 Preload XChildName[4] | 1,306 | 13.76  |
| Total                   | 9,489 | 100.00 |

## db039\_s5: Which Child's Family Will Help You in Future

|                         | Freq. | %      |
|-------------------------|-------|--------|
| 0 No                    | 9,005 | 94.90  |
| 5 Preload XChildName[5] | 484   | 5.10   |
| Total                   | 9,489 | 100.00 |

**db039\_s6: Which Child's Family Will Help You in Future**

|                         | Freq. | %      |
|-------------------------|-------|--------|
| 0 No                    | 9,327 | 98.29  |
| 6 Preload XChildName[6] | 162   | 1.71   |
| Total                   | 9,489 | 100.00 |

**db039\_s7: Which Child's Family Will Help You in Future**

|                         | Freq. | %      |
|-------------------------|-------|--------|
| 0 No                    | 9,430 | 99.38  |
| 7 Preload XChildName[7] | 59    | 0.62   |
| Total                   | 9,489 | 100.00 |

**db039\_s8: Which Child's Family Will Help You in Future**

|                         | Freq. | %      |
|-------------------------|-------|--------|
| 0 No                    | 9,465 | 99.75  |
| 8 Preload XChildName[8] | 24    | 0.25   |
| Total                   | 9,489 | 100.00 |

**db039\_s9: Which Child's Family Will Help You in Future**

|                         | Freq. | %      |
|-------------------------|-------|--------|
| 0 No                    | 9,480 | 99.91  |
| 9 Preload XChildName[9] | 9     | 0.09   |
| Total                   | 9,489 | 100.00 |

**db039\_s10: Which Child's Family Will Help You in Future**

|                           | Freq. | %      |
|---------------------------|-------|--------|
| 0 No                      | 9,485 | 99.96  |
| 10 Preload XChildName[10] | 4     | 0.04   |
| Total                     | 9,489 | 100.00 |

**db039\_s11: Which Child's Family Will Help You in Future**

|                           | Freq. | %      |
|---------------------------|-------|--------|
| 0 No                      | 9,487 | 99.98  |
| 11 Preload XChildName[11] | 2     | 0.02   |
| Total                     | 9,489 | 100.00 |

**db039\_s12: Which Child's Family Will Help You in Future**

|                           | Freq. | %      |
|---------------------------|-------|--------|
| 0 No                      | 9,488 | 99.99  |
| 12 Preload XChildName[12] | 1     | 0.01   |
| Total                     | 9,489 | 100.00 |

**db039\_s13:** Which Child's Family Will Help You in Future

|       | Freq. | %      |
|-------|-------|--------|
| 0 No  | 9,489 | 100.00 |
| Total | 9,489 | 100.00 |

**db039\_s14:** Which Child's Family Will Help You in Future

|       | Freq. | %      |
|-------|-------|--------|
| 0 No  | 9,489 | 100.00 |
| Total | 9,489 | 100.00 |

**db039\_s15:** Which Child's Family Will Help You in Future

|       | Freq. | %      |
|-------|-------|--------|
| 0 No  | 9,489 | 100.00 |
| Total | 9,489 | 100.00 |

**db039\_s16:** Which Child's Family Will Help You in Future

|       | Freq. | %      |
|-------|-------|--------|
| 0 No  | 9,489 | 100.00 |
| Total | 9,489 | 100.00 |

**db039\_s17:** Which Child's Family Will Help You in Future

|       | Freq. | %      |
|-------|-------|--------|
| 0 No  | 9,489 | 100.00 |
| Total | 9,489 | 100.00 |

**db039\_s18:** Which Child's Family Will Help You in Future

|       | Freq. | %      |
|-------|-------|--------|
| 0 No  | 9,489 | 100.00 |
| Total | 9,489 | 100.00 |

**db039\_s19:** Which Child's Family Will Help You in Future

|       | Freq. | %      |
|-------|-------|--------|
| 0 No  | 9,489 | 100.00 |
| Total | 9,489 | 100.00 |

**db039\_s20: Which Child's Family Will Help You in Future**

|       | Freq. | %      |
|-------|-------|--------|
| 0 No  | 9,489 | 100.00 |
| Total | 9,489 | 100.00 |

**db039\_s21: Which Child's Family Will Help You in Future**

|       | Freq. | %      |
|-------|-------|--------|
| 0 No  | 9,489 | 100.00 |
| Total | 9,489 | 100.00 |

**db039\_s22: Which Child's Family Will Help You in Future**

|       | Freq. | %      |
|-------|-------|--------|
| 0 No  | 9,489 | 100.00 |
| Total | 9,489 | 100.00 |

**db039\_s23: Which Child's Family Will Help You in Future**

|       | Freq. | %      |
|-------|-------|--------|
| 0 No  | 9,489 | 100.00 |
| Total | 9,489 | 100.00 |

**db039\_s24: Which Child's Family Will Help You in Future**

|       | Freq. | %      |
|-------|-------|--------|
| 0 No  | 9,489 | 100.00 |
| Total | 9,489 | 100.00 |

**db039\_s25: Which Child's Family Will Help You in Future**

|       | Freq. | %      |
|-------|-------|--------|
| 0 No  | 9,489 | 100.00 |
| Total | 9,489 | 100.00 |

**db039\_s26: Which Child's Family Will Help You in Future**

|                    | Freq. | %      |
|--------------------|-------|--------|
| 0 No               | 9,177 | 96.71  |
| 26 Other Child[26] | 312   | 3.29   |
| Total              | 9,489 | 100.00 |

**db039\_s27: Which Child's Family Will Help You in Future**

|                    | Freq. | %     |
|--------------------|-------|-------|
| 0 No               | 9,350 | 98.54 |
| 27 Other Child[27] | 139   | 1.46  |



|       |       |        |
|-------|-------|--------|
| Total | 9,489 | 100.00 |
|-------|-------|--------|

**db039\_s28: Which Child's Family Will Help You in Future**

|                    | Freq. | %      |
|--------------------|-------|--------|
| 0 No               | 9,432 | 99.40  |
| 28 Other Child[28] | 57    | 0.60   |
| Total              | 9,489 | 100.00 |

**db039\_s29: Which Child's Family Will Help You in Future**

|                    | Freq. | %      |
|--------------------|-------|--------|
| 0 No               | 9,462 | 99.72  |
| 29 Other Child[29] | 27    | 0.28   |
| Total              | 9,489 | 100.00 |

**db039\_s30: Which Child's Family Will Help You in Future**

|                    | Freq. | %      |
|--------------------|-------|--------|
| 0 No               | 9,479 | 99.89  |
| 30 Other Child[30] | 10    | 0.11   |
| Total              | 9,489 | 100.00 |

**db039\_s31: Which Child's Family Will Help You in Future**

|                    | Freq. | %      |
|--------------------|-------|--------|
| 0 No               | 9,484 | 99.95  |
| 31 Other Child[31] | 5     | 0.05   |
| Total              | 9,489 | 100.00 |

**db039\_s32: Which Child's Family Will Help You in Future**

|                    | Freq. | %      |
|--------------------|-------|--------|
| 0 No               | 9,486 | 99.97  |
| 32 Other Child[32] | 3     | 0.03   |
| Total              | 9,489 | 100.00 |

**db039\_s33: Which Child's Family Will Help You in Future**

|                    | Freq. | %      |
|--------------------|-------|--------|
| 0 No               | 9,486 | 99.97  |
| 33 Other Child[33] | 3     | 0.03   |
| Total              | 9,489 | 100.00 |

**db039\_s34: Which Child's Family Will Help You in Future**

|       | Freq. | %      |
|-------|-------|--------|
| 0 No  | 9,489 | 100.00 |
| Total | 9,489 | 100.00 |

**db039\_s35: Which Child's Family Will Help You in Future**

|                    | Freq. | %      |
|--------------------|-------|--------|
| 0 No               | 9,487 | 99.98  |
| 35 Other Child[35] | 2     | 0.02   |
| Total              | 9,489 | 100.00 |

**db040\_s1: Which Sibling's Family Will Help You**

|                       | Freq. | %      |
|-----------------------|-------|--------|
| 0 No                  | 240   | 37.68  |
| 1 Preload XSibName[1] | 397   | 62.32  |
| Total                 | 637   | 100.00 |

**db040\_s2: Which Sibling's Family Will Help You**

|                       | Freq. | %      |
|-----------------------|-------|--------|
| 0 No                  | 255   | 40.03  |
| 2 Preload XSibName[2] | 382   | 59.97  |
| Total                 | 637   | 100.00 |

**db040\_s3: Which Sibling's Family Will Help You**

|                       | Freq. | %      |
|-----------------------|-------|--------|
| 0 No                  | 282   | 44.27  |
| 3 Preload XSibName[3] | 355   | 55.73  |
| Total                 | 637   | 100.00 |

**db040\_s4: Which Sibling's Family Will Help You**

|                       | Freq. | %      |
|-----------------------|-------|--------|
| 0 No                  | 381   | 59.81  |
| 4 Preload XSibName[4] | 256   | 40.19  |
| Total                 | 637   | 100.00 |

**db040\_s5: Which Sibling's Family Will Help You**

|                       | Freq. | %      |
|-----------------------|-------|--------|
| 0 No                  | 469   | 73.63  |
| 5 Preload XSibName[5] | 168   | 26.37  |
| Total                 | 637   | 100.00 |

**db040\_s6: Which Sibling's Family Will Help You**

|                       | Freq. | %      |
|-----------------------|-------|--------|
| 0 No                  | 558   | 87.60  |
| 6 Preload XSibName[6] | 79    | 12.40  |
| Total                 | 637   | 100.00 |

**db040\_s7: Which Sibling's Family Will Help You**

|                       | Freq. | %      |
|-----------------------|-------|--------|
| 0 No                  | 608   | 95.45  |
| 7 Preload XSibName[7] | 29    | 4.55   |
| Total                 | 637   | 100.00 |

**db040\_s8: Which Sibling's Family Will Help You**

|                       | Freq. | %      |
|-----------------------|-------|--------|
| 0 No                  | 621   | 97.49  |
| 8 Preload XSibName[8] | 16    | 2.51   |
| Total                 | 637   | 100.00 |

**db040\_s9: Which Sibling's Family Will Help You**

|                       | Freq. | %      |
|-----------------------|-------|--------|
| 0 No                  | 631   | 99.06  |
| 9 Preload XSibName[9] | 6     | 0.94   |
| Total                 | 637   | 100.00 |

**db040\_s10: Which Sibling's Family Will Help You**

|                         | Freq. | %      |
|-------------------------|-------|--------|
| 0 No                    | 635   | 99.69  |
| 10 Preload XSibName[10] | 2     | 0.31   |
| Total                   | 637   | 100.00 |

**db040\_s11: Which Sibling's Family Will Help You**

|       | Freq. | %      |
|-------|-------|--------|
| 0 No  | 637   | 100.00 |
| Total | 637   | 100.00 |

**db040\_s12: Which Sibling's Family Will Help You**

|       | Freq. | %      |
|-------|-------|--------|
| 0 No  | 637   | 100.00 |
| Total | 637   | 100.00 |

**db040\_s13: Which Sibling's Family Will Help You**

|       | Freq. | %      |
|-------|-------|--------|
| 0 No  | 637   | 100.00 |
| Total | 637   | 100.00 |

**db040\_s14: Which Sibling's Family Will Help You**

|       | Freq. | %      |
|-------|-------|--------|
| 0 No  | 637   | 100.00 |
| Total | 637   | 100.00 |

**db040\_s15: Which Sibling's Family Will Help You**

|       | Freq. | %      |
|-------|-------|--------|
| 0 No  | 637   | 100.00 |
| Total | 637   | 100.00 |

**db040\_s16: Which Sibling's Family Will Help You**

|                         | Freq. | %      |
|-------------------------|-------|--------|
| 0 No                    | 418   | 65.62  |
| 16 Preload XSibName[16] | 219   | 34.38  |
| Total                   | 637   | 100.00 |

**db040\_s17: Which Sibling's Family Will Help You**

|                         | Freq. | %      |
|-------------------------|-------|--------|
| 0 No                    | 412   | 64.68  |
| 17 Preload XSibName[17] | 225   | 35.32  |
| Total                   | 637   | 100.00 |

**db040\_s18: Which Sibling's Family Will Help You**

|                         | Freq. | %      |
|-------------------------|-------|--------|
| 0 No                    | 437   | 68.60  |
| 18 Preload XSibName[18] | 200   | 31.40  |
| Total                   | 637   | 100.00 |

**db040\_s19: Which Sibling's Family Will Help You**

|                         | Freq. | %      |
|-------------------------|-------|--------|
| 0 No                    | 496   | 77.86  |
| 19 Preload XSibName[19] | 141   | 22.14  |
| Total                   | 637   | 100.00 |

**db040\_s20: Which Sibling's Family Will Help You**

|                         | Freq. | %      |
|-------------------------|-------|--------|
| 0 No                    | 548   | 86.03  |
| 20 Preload XSibName[20] | 89    | 13.97  |
| Total                   | 637   | 100.00 |

**db040\_s21: Which Sibling's Family Will Help You**

|                         | Freq. | %      |
|-------------------------|-------|--------|
| 0 No                    | 603   | 94.66  |
| 21 Preload XSibName[21] | 34    | 5.34   |
| Total                   | 637   | 100.00 |

**db040\_s22: Which Sibling's Family Will Help You**

|                         | Freq. | %      |
|-------------------------|-------|--------|
| 0 No                    | 621   | 97.49  |
| 22 Preload XSibName[22] | 16    | 2.51   |
| Total                   | 637   | 100.00 |

**db040\_s23: Which Sibling's Family Will Help You**

|                         | Freq. | %      |
|-------------------------|-------|--------|
| 0 No                    | 631   | 99.06  |
| 23 Preload XSibName[23] | 6     | 0.94   |
| Total                   | 637   | 100.00 |

**db040\_s24: Which Sibling's Family Will Help You**

|                         | Freq. | %      |
|-------------------------|-------|--------|
| 0 No                    | 636   | 99.84  |
| 24 Preload XSibName[24] | 1     | 0.16   |
| Total                   | 637   | 100.00 |

**db040\_s25: Which Sibling's Family Will Help You**

|                         | Freq. | %      |
|-------------------------|-------|--------|
| 0 No                    | 635   | 99.69  |
| 25 Preload XSibName[25] | 2     | 0.31   |
| Total                   | 637   | 100.00 |

**db040\_s26: Which Sibling's Family Will Help You**

|       | Freq. | %      |
|-------|-------|--------|
| 0 No  | 637   | 100.00 |
| Total | 637   | 100.00 |

**db040\_s27: Which Sibling's Family Will Help You**

|       | Freq. | %      |
|-------|-------|--------|
| 0 No  | 637   | 100.00 |
| Total | 637   | 100.00 |

**db040\_s28: Which Sibling's Family Will Help You**

|       | Freq. | %      |
|-------|-------|--------|
| 0 No  | 637   | 100.00 |
| Total | 637   | 100.00 |

**db040\_s29:** Which Sibling's Family Will Help You

|       | Freq. | %      |
|-------|-------|--------|
| 0 No  | 637   | 100.00 |
| Total | 637   | 100.00 |

**db040\_s30:** Which Sibling's Family Will Help You

|       | Freq. | %      |
|-------|-------|--------|
| 0 No  | 637   | 100.00 |
| Total | 637   | 100.00 |

**db040\_s31:** Which Sibling's Family Will Help You

|                      | Freq. | %      |
|----------------------|-------|--------|
| 0 No                 | 590   | 92.62  |
| 31 Other Sibling[31] | 47    | 7.38   |
| Total                | 637   | 100.00 |

**db040\_s32:** Which Sibling's Family Will Help You

|                      | Freq. | %      |
|----------------------|-------|--------|
| 0 No                 | 622   | 97.65  |
| 32 Other Sibling[32] | 15    | 2.35   |
| Total                | 637   | 100.00 |

**db040\_s33:** Which Sibling's Family Will Help You

|                      | Freq. | %      |
|----------------------|-------|--------|
| 0 No                 | 635   | 99.69  |
| 33 Other Sibling[33] | 2     | 0.31   |
| Total                | 637   | 100.00 |

**db040\_s34:** Which Sibling's Family Will Help You

|       | Freq. | %      |
|-------|-------|--------|
| 0 No  | 637   | 100.00 |
| Total | 637   | 100.00 |

**db040\_s35:** Which Sibling's Family Will Help You

|      | Freq. | %      |
|------|-------|--------|
| 0 No | 637   | 100.00 |

|       |     |        |
|-------|-----|--------|
| Total | 637 | 100.00 |
|-------|-----|--------|

**db040\_s36: Which Sibling's Family Will Help You**

|       | Freq. | %      |
|-------|-------|--------|
| 0 No  | 637   | 100.00 |
| Total | 637   | 100.00 |

**db040\_s37: Which Sibling's Family Will Help You**

|       | Freq. | %      |
|-------|-------|--------|
| 0 No  | 637   | 100.00 |
| Total | 637   | 100.00 |

**db040\_s38: Which Sibling's Family Will Help You**

|       | Freq. | %      |
|-------|-------|--------|
| 0 No  | 637   | 100.00 |
| Total | 637   | 100.00 |

**db040\_s39: Which Sibling's Family Will Help You**

|       | Freq. | %      |
|-------|-------|--------|
| 0 No  | 637   | 100.00 |
| Total | 637   | 100.00 |

**db040\_s40: Which Sibling's Family Will Help You**

|       | Freq. | %      |
|-------|-------|--------|
| 0 No  | 637   | 100.00 |
| Total | 637   | 100.00 |

**db041: Number of Relatives Help in Person**

| Mean | SD   | Min   | Max   | Obs |
|------|------|-------|-------|-----|
| 4.05 | 6.56 | -1.00 | 50.00 | 116 |

**db042: Number of Others Who Help in Person**

| Mean | SD    | Min   | Max   | Obs |
|------|-------|-------|-------|-----|
| 3.70 | 10.39 | -1.00 | 80.00 | 64  |

**db043: Can't Work Because of Disability or Health**

|                              | Freq. | %     |
|------------------------------|-------|-------|
| 1 I Can't Work at All        | 2,419 | 12.50 |
| 2 I Can't Work for Long Time | 4,692 | 24.25 |

|                             |        |        |
|-----------------------------|--------|--------|
| 3 I Have No Problem Working | 12,234 | 63.24  |
| Total                       | 19,345 | 100.00 |

**db044: Can't Do Household Work Because of Disability or Health**

|                            | Freq.  | %      |
|----------------------------|--------|--------|
| 1 I Can't Do at All        | 189    | 1.12   |
| 2 I Can't Do for Long Time | 3,484  | 20.58  |
| 3 I Have No Problem        | 13,253 | 78.30  |
| Total                      | 16,926 | 100.00 |

**db045: How often the Respondent Receive Assistance**

|                                                   | Freq.  | %      |
|---------------------------------------------------|--------|--------|
| 1 Never                                           | 15,476 | 80.00  |
| 2 A Few Times                                     | 2,368  | 12.24  |
| 3 Most or All of the Time                         | 317    | 1.64   |
| 4 The Section Was Completed by a Proxy Respondent | 1,184  | 6.12   |
| Total                                             | 19,345 | 100.00 |

**db046: Relationship to R**

|                                 | Freq. | %      |
|---------------------------------|-------|--------|
| 1 Spouse                        | 626   | 52.87  |
| 2 Mother                        | 4     | 0.34   |
| 3 Father                        | 2     | 0.17   |
| 4 Mother-in-Law                 | 6     | 0.51   |
| 5 Father-in-Law                 | 5     | 0.42   |
| 6 Sibling                       | 25    | 2.11   |
| 7 Brother-in-Law, sister-in-Law | 7     | 0.59   |
| 8 Child                         | 282   | 23.82  |
| 9 Spouse of Child               | 98    | 8.28   |
| 10 Grandchild                   | 48    | 4.05   |
| 11 Other Relative               | 27    | 2.28   |
| 12 Helper or Other Non-Relative | 54    | 4.56   |
| Total                           | 1,184 | 100.00 |

**db047: Main Reason for Proxy**

|                                             | Freq. | %      |
|---------------------------------------------|-------|--------|
| 1 Respondent Has Serious Physical Handicaps | 473   | 39.95  |
| 2 Respondent Has Serious Mental Handicaps   | 122   | 10.30  |
| 3 Respondent Has Rejected this Interview    | 315   | 26.60  |
| 4 Others, Please Specify                    | 274   | 23.14  |
| Total                                       | 1,184 | 100.00 |

**dc001: Checking Year**

|                | Freq.  | %     |
|----------------|--------|-------|
| 1 Correct      | 11,811 | 67.21 |
| 2 Error        | 2,845  | 16.19 |
| 997 Don't Know | 2,897  | 16.49 |



|             |        |        |
|-------------|--------|--------|
| 999 Refused | 20     | 0.11   |
| Total       | 17,573 | 100.00 |

**dc002: Checking Season**

|                | Freq.  | %      |
|----------------|--------|--------|
| 1 Correct      | 13,353 | 75.99  |
| 2 Error        | 2,046  | 11.64  |
| 997 Don't Know | 2,155  | 12.26  |
| 999 Refused    | 19     | 0.11   |
| Total          | 17,573 | 100.00 |

**dc003: Checking Date**

|                | Freq.  | %      |
|----------------|--------|--------|
| 1 Correct      | 11,531 | 65.62  |
| 2 Error        | 2,875  | 16.36  |
| 997 Don't Know | 3,150  | 17.93  |
| 999 Refused    | 17     | 0.10   |
| Total          | 17,573 | 100.00 |

**dc004: Checking Day**

|                | Freq.  | %      |
|----------------|--------|--------|
| 1 Correct      | 10,698 | 60.88  |
| 2 Error        | 2,705  | 15.39  |
| 997 Don't Know | 4,155  | 23.65  |
| 999 Refused    | 14     | 0.08   |
| Total          | 17,572 | 100.00 |

**dc005: Checking Month**

|                | Freq.  | %      |
|----------------|--------|--------|
| 1 Correct      | 15,825 | 90.06  |
| 2 Error        | 973    | 5.54   |
| 997 Don't Know | 762    | 4.34   |
| 999 Refused    | 12     | 0.07   |
| Total          | 17,572 | 100.00 |

**dc006: Self-Rated Memory**

|                | Freq.  | %      |
|----------------|--------|--------|
| 1 Excellent    | 92     | 0.52   |
| 2 Very Good    | 738    | 4.20   |
| 3 Good         | 1,220  | 6.94   |
| 4 Fair         | 9,898  | 56.33  |
| 5 Poor         | 5,568  | 31.69  |
| 997 Don't Know | 56     | 0.32   |
| Total          | 17,572 | 100.00 |

**dc007\_1: Result for 100-7**

|                 | Freq.  | %      |
|-----------------|--------|--------|
| 1 Record Answer | 14,149 | 80.52  |
| 997 Don't Know  | 2,546  | 14.49  |
| 999 Refused     | 876    | 4.99   |
| Total           | 17,571 | 100.00 |

#### dc007\_1\_1: Specific Result from 100-7

| Mean       | SD          | Min  | Max      | Obs    |
|------------|-------------|------|----------|--------|
| 663,423.95 | 78908514.63 | 0.00 | 9.39e+09 | 14,151 |

#### dc007\_2: Result for dc007\_1\_1-7

|                 | Freq.  | %      |
|-----------------|--------|--------|
| 1 Record Answer | 12,930 | 91.38  |
| 997 Don't Know  | 1,063  | 7.51   |
| 999 Refused     | 156    | 1.10   |
| Total           | 14,149 | 100.00 |

#### dc007\_2\_1: Specific Result from dc007\_1\_1-7

| Mean       | SD          | Min   | Max      | Obs    |
|------------|-------------|-------|----------|--------|
| 726,056.50 | 82550208.84 | -1.00 | 9.39e+09 | 12,930 |

#### dc007\_3: Result for dc007\_2\_1-7

|                 | Freq.  | %      |
|-----------------|--------|--------|
| 1 Record Answer | 12,374 | 95.70  |
| 997 Don't Know  | 458    | 3.54   |
| 999 Refused     | 98     | 0.76   |
| Total           | 12,930 | 100.00 |

#### dc007\_3\_1: Specific Result from dc007\_2\_1-7

| Mean  | SD    | Min  | Max    | Obs    |
|-------|-------|------|--------|--------|
| 77.46 | 11.11 | 0.00 | 979.00 | 12,374 |

#### dc007\_4: Result for dc007\_4\_1-7

|                 | Freq.  | %      |
|-----------------|--------|--------|
| 1 Record Answer | 12,027 | 97.20  |
| 997 Don't Know  | 285    | 2.30   |
| 999 Refused     | 62     | 0.50   |
| Total           | 12,374 | 100.00 |

#### dc007\_4\_1: Specific Result from dc007\_3\_1-7

| Mean  | SD    | Min   | Max    | Obs    |
|-------|-------|-------|--------|--------|
| 69.86 | 11.88 | -1.00 | 972.00 | 12,027 |

**dc007\_5: Result for dc007\_4\_1-7**

|                 | Freq.  | %      |
|-----------------|--------|--------|
| 1 Record Answer | 11,706 | 97.33  |
| 997 Don't Know  | 282    | 2.34   |
| 999 Refused     | 39     | 0.32   |
| Total           | 12,027 | 100.00 |

**dc007\_5\_1: Specific Result from dc007\_4\_1-7**

| Mean  | SD    | Min   | Max    | Obs    |
|-------|-------|-------|--------|--------|
| 62.95 | 12.63 | -1.00 | 965.00 | 11,707 |

**dc008: Use Pen Paper or Other Instruments for Mathematics**

|            | Freq.  | %      |
|------------|--------|--------|
| 1 Used     | 1,615  | 11.41  |
| 2 Not Used | 12,534 | 88.59  |
| Total      | 14,149 | 100.00 |

**dc009: Draw**

|                | Freq.  | %      |
|----------------|--------|--------|
| 1 Correct      | 5,371  | 30.57  |
| 2 Error        | 10,105 | 57.51  |
| 3 Not Assessed | 610    | 3.47   |
| 997 Don't Know | 592    | 3.37   |
| 999 Refused    | 892    | 5.08   |
| Total          | 17,570 | 100.00 |

**dc010\_1: Understand WR Test**

|       | Freq.  | %      |
|-------|--------|--------|
| 1 Yes | 17,005 | 96.78  |
| 2 No  | 565    | 3.22   |
| Total | 17,570 | 100.00 |

**dc010\_2: Understand WR Test**

|       | Freq. | %      |
|-------|-------|--------|
| 1 Yes | 70    | 12.39  |
| 2 No  | 495   | 87.61  |
| Total | 565   | 100.00 |

**dc010\_3: Understand WR Test**

|       | Freq. | %      |
|-------|-------|--------|
| 1 Yes | 60    | 12.12  |
| 2 No  | 435   | 87.88  |
| Total | 495   | 100.00 |

**dc011\_s1: Reasons for Rufused Word Recall Test**

|           | Freq. | %      |
|-----------|-------|--------|
| 0 No      | 206   | 37.66  |
| 1 Refused | 341   | 62.34  |
| Total     | 547   | 100.00 |

**dc011\_s2: Reasons for Rufused Word Recall Test**

|       | Freq. | %      |
|-------|-------|--------|
| 0 No  | 547   | 100.00 |
| Total | 547   | 100.00 |

**dc011\_s3: Reasons for Rufused Word Recall Test**

|                   | Freq. | %      |
|-------------------|-------|--------|
| 0 No              | 538   | 98.35  |
| 3 Dumb at Old Age | 9     | 1.65   |
| Total             | 547   | 100.00 |

**dc011\_s4: Reasons for Rufused Word Recall Test**

|        | Freq. | %      |
|--------|-------|--------|
| 0 No   | 446   | 81.54  |
| 4 Deaf | 101   | 18.46  |
| Total  | 547   | 100.00 |

**dc011\_s5: Reasons for Rufused Word Recall Test**

|                          | Freq. | %      |
|--------------------------|-------|--------|
| 0 No                     | 349   | 63.80  |
| 5 Others, Please Sepficy | 198   | 36.20  |
| Total                    | 547   | 100.00 |

**dc012\_s1: Wordlist[9]**

|       | Freq.  | %      |
|-------|--------|--------|
| 0 No  | 7,463  | 42.48  |
| 1 Yes | 10,107 | 57.52  |
| Total | 17,570 | 100.00 |

**dc012\_s2: Wordlist[3]**

|       | Freq.  | %      |
|-------|--------|--------|
| 0 No  | 12,754 | 72.59  |
| 2 Yes | 4,816  | 27.41  |
| Total | 17,570 | 100.00 |

## dc012\_s3: Wordlist[1]

|       | Freq.  | %      |
|-------|--------|--------|
| 0 No  | 13,906 | 79.15  |
| 3 Yes | 3,664  | 20.85  |
| Total | 17,570 | 100.00 |

## dc012\_s4: Wordlist[2]

|       | Freq.  | %      |
|-------|--------|--------|
| 0 No  | 16,153 | 91.94  |
| 4 Yes | 1,417  | 8.06   |
| Total | 17,570 | 100.00 |

## dc012\_s5: Wordlist[10]

|       | Freq.  | %      |
|-------|--------|--------|
| 0 No  | 13,672 | 77.81  |
| 5 Yes | 3,898  | 22.19  |
| Total | 17,570 | 100.00 |

## dc012\_s6: Wordlist[4]

|       | Freq.  | %      |
|-------|--------|--------|
| 0 No  | 12,744 | 72.53  |
| 6 Yes | 4,826  | 27.47  |
| Total | 17,570 | 100.00 |

## dc012\_s7: Wordlist[5]

|       | Freq.  | %      |
|-------|--------|--------|
| 0 No  | 9,867  | 56.16  |
| 7 Yes | 7,703  | 43.84  |
| Total | 17,570 | 100.00 |

## dc012\_s8: Wordlist[6]

|       | Freq.  | %      |
|-------|--------|--------|
| 0 No  | 14,812 | 84.30  |
| 8 Yes | 2,758  | 15.70  |
| Total | 17,570 | 100.00 |

## dc012\_s9: Wordlist[8]

|       | Freq.  | %      |
|-------|--------|--------|
| 0 No  | 7,724  | 43.96  |
| 9 Yes | 9,846  | 56.04  |
| Total | 17,570 | 100.00 |

dc012\_s10: Wordlist[7]

|        | Freq.  | %      |
|--------|--------|--------|
| 0 No   | 7,629  | 43.42  |
| 10 Yes | 9,941  | 56.58  |
| Total  | 17,570 | 100.00 |

dc012\_s11: None of the Above

|        | Freq.  | %      |
|--------|--------|--------|
| 0 No   | 16,326 | 92.92  |
| 11 Yes | 1,244  | 7.08   |
| Total  | 17,570 | 100.00 |

dc012\_s12: Refused to Recall

|        | Freq.  | %      |
|--------|--------|--------|
| 0 No   | 17,143 | 97.57  |
| 12 Yes | 427    | 2.43   |
| Total  | 17,570 | 100.00 |

dc012\_s13: Can't Understand or Incapable of the Test

|        | Freq.  | %      |
|--------|--------|--------|
| 0 No   | 17,023 | 96.89  |
| 13 Yes | 547    | 3.11   |
| Total  | 17,570 | 100.00 |

dc013\_s1: Wordlist[5]

|       | Freq.  | %      |
|-------|--------|--------|
| 0 No  | 6,093  | 36.71  |
| 1 Yes | 10,503 | 63.29  |
| Total | 16,596 | 100.00 |

dc013\_s2: Wordlist[2]

|       | Freq.  | %      |
|-------|--------|--------|
| 0 No  | 12,600 | 75.92  |
| 2 Yes | 3,996  | 24.08  |
| Total | 16,596 | 100.00 |

dc013\_s3: Wordlist[9]

|       | Freq.  | %      |
|-------|--------|--------|
| 0 No  | 6,196  | 37.33  |
| 3 Yes | 10,400 | 62.67  |
| Total | 16,596 | 100.00 |

## dc013\_s4: Wordlist[10]

|       | Freq.  | %      |
|-------|--------|--------|
| 0 No  | 9,402  | 56.65  |
| 4 Yes | 7,194  | 43.35  |
| Total | 16,596 | 100.00 |

## dc013\_s5: Wordlist[3]

|       | Freq.  | %      |
|-------|--------|--------|
| 0 No  | 9,042  | 54.48  |
| 5 Yes | 7,554  | 45.52  |
| Total | 16,596 | 100.00 |

## dc013\_s6: Wordlist[1]

|       | Freq.  | %      |
|-------|--------|--------|
| 0 No  | 9,680  | 58.33  |
| 6 Yes | 6,916  | 41.67  |
| Total | 16,596 | 100.00 |

## dc013\_s7: Wordlist[8]

|       | Freq.  | %      |
|-------|--------|--------|
| 0 No  | 6,045  | 36.42  |
| 7 Yes | 10,551 | 63.58  |
| Total | 16,596 | 100.00 |

## dc013\_s8: Wordlist[4]

|       | Freq.  | %      |
|-------|--------|--------|
| 0 No  | 6,258  | 37.71  |
| 8 Yes | 10,338 | 62.29  |
| Total | 16,596 | 100.00 |

## dc013\_s9: Wordlist[6]

|       | Freq.  | %      |
|-------|--------|--------|
| 0 No  | 9,163  | 55.21  |
| 9 Yes | 7,433  | 44.79  |
| Total | 16,596 | 100.00 |

## dc013\_s10: Wordlist[7]

|        | Freq.  | %      |
|--------|--------|--------|
| 0 No   | 5,028  | 30.30  |
| 10 Yes | 11,568 | 69.70  |
| Total  | 16,596 | 100.00 |

dc013\_s11: None of the Above

|        | Freq.  | %      |
|--------|--------|--------|
| 0 No   | 15,985 | 96.32  |
| 11 Yes | 611    | 3.68   |
| Total  | 16,596 | 100.00 |

dc013\_s12: Refused to Recall

|        | Freq.  | %      |
|--------|--------|--------|
| 0 No   | 16,330 | 98.40  |
| 12 Yes | 266    | 1.60   |
| Total  | 16,596 | 100.00 |

dc014\_s1: Wordlist[1]

|       | Freq.  | %      |
|-------|--------|--------|
| 0 No  | 7,158  | 43.83  |
| 1 Yes | 9,172  | 56.17  |
| Total | 16,330 | 100.00 |

dc014\_s2: Wordlist[2]

|       | Freq.  | %      |
|-------|--------|--------|
| 0 No  | 10,072 | 61.68  |
| 2 Yes | 6,258  | 38.32  |
| Total | 16,330 | 100.00 |

dc014\_s3: Wordlist[3]

|       | Freq.  | %      |
|-------|--------|--------|
| 0 No  | 7,662  | 46.92  |
| 3 Yes | 8,668  | 53.08  |
| Total | 16,330 | 100.00 |

dc014\_s4: Wordlist[4]

|       | Freq.  | %      |
|-------|--------|--------|
| 0 No  | 7,111  | 43.55  |
| 4 Yes | 9,219  | 56.45  |
| Total | 16,330 | 100.00 |

dc014\_s5: Wordlist[5]



|       | Freq.  | %      |
|-------|--------|--------|
| 0 No  | 5,178  | 31.71  |
| 5 Yes | 11,152 | 68.29  |
| Total | 16,330 | 100.00 |

**dc014\_s6: Wordlist[6]**

|       | Freq.  | %      |
|-------|--------|--------|
| 0 No  | 9,862  | 60.39  |
| 6 Yes | 6,468  | 39.61  |
| Total | 16,330 | 100.00 |

**dc014\_s7: Wordlist[7]**

|       | Freq.  | %      |
|-------|--------|--------|
| 0 No  | 6,681  | 40.91  |
| 7 Yes | 9,649  | 59.09  |
| Total | 16,330 | 100.00 |

**dc014\_s8: Wordlist[8]**

|       | Freq.  | %      |
|-------|--------|--------|
| 0 No  | 4,381  | 26.83  |
| 8 Yes | 11,949 | 73.17  |
| Total | 16,330 | 100.00 |

**dc014\_s9: Wordlist[9]**

|       | Freq.  | %      |
|-------|--------|--------|
| 0 No  | 4,494  | 27.52  |
| 9 Yes | 11,836 | 72.48  |
| Total | 16,330 | 100.00 |

**dc014\_s10: Wordlist[10]**

|        | Freq.  | %      |
|--------|--------|--------|
| 0 No   | 4,749  | 29.08  |
| 10 Yes | 11,581 | 70.92  |
| Total  | 16,330 | 100.00 |

**dc014\_s11: None of the Above**

|        | Freq.  | %      |
|--------|--------|--------|
| 0 No   | 15,741 | 96.39  |
| 11 Yes | 589    | 3.61   |
| Total  | 16,330 | 100.00 |

**dc014\_s12: Refused to Recall**

|        | Freq.  | %      |
|--------|--------|--------|
| 0 No   | 16,096 | 98.57  |
| 12 Yes | 234    | 1.43   |
| Total  | 16,330 | 100.00 |

**dc015\_s1: Whether any of the Following Apply**

|                                              | Freq.  | %      |
|----------------------------------------------|--------|--------|
| 0 No                                         | 16,297 | 95.74  |
| 1 Interruption Occured during Administration | 726    | 4.26   |
| Total                                        | 17,023 | 100.00 |

**dc015\_s2: Whether any of the Following Apply**

|                          | Freq.  | %      |
|--------------------------|--------|--------|
| 0 No                     | 15,621 | 91.76  |
| 2 Others, Please Specify | 1,402  | 8.24   |
| Total                    | 17,023 | 100.00 |

**dc015\_s3: Whether any of the Following Apply**

|                     | Freq.  | %      |
|---------------------|--------|--------|
| 0 No                | 2,063  | 12.12  |
| 3 None of the above | 14,960 | 87.88  |
| Total               | 17,023 | 100.00 |

**dc016: Bothered by Things**

|                                                      | Freq.  | %      |
|------------------------------------------------------|--------|--------|
| 1 Rarely or None (<1 Day)                            | 8,686  | 49.44  |
| 2 Some or A Little (1-2 Days)                        | 2,746  | 15.63  |
| 3 Occasionally or Moderate Amount of Time (3-4 Days) | 3,534  | 20.12  |
| 4 Most of the Time (5-7 Days)                        | 2,321  | 13.21  |
| 997 Don't Know                                       | 242    | 1.38   |
| 999 Refused                                          | 39     | 0.22   |
| Total                                                | 17,568 | 100.00 |

**dc017: Had Trouble Keeping Mind**

|                                                      | Freq.  | %      |
|------------------------------------------------------|--------|--------|
| 1 Rarely or None (<1 Day)                            | 8,574  | 48.80  |
| 2 Some or A Little (1-2 Days)                        | 2,653  | 15.10  |
| 3 Occasionally or Moderate Amount of Time (3-4 Days) | 3,531  | 20.10  |
| 4 Most of the Time (5-7 Days)                        | 2,336  | 13.30  |
| 997 Don't Know                                       | 426    | 2.42   |
| 999 Refused                                          | 48     | 0.27   |
| Total                                                | 17,568 | 100.00 |

**dc018: Felt Depressed**

|                                                      | Freq.  | %      |
|------------------------------------------------------|--------|--------|
| 1 Rarely or None (<1 Day)                            | 9,059  | 51.57  |
| 2 Some or A Little (1-2 Days)                        | 2,656  | 15.12  |
| 3 Occasionally or Moderate Amount of Time (3-4 Days) | 3,435  | 19.55  |
| 4 Most of the Time (5-7 Days)                        | 1,964  | 11.18  |
| 997 Don't Know                                       | 415    | 2.36   |
| 999 Refused                                          | 39     | 0.22   |
| Total                                                | 17,568 | 100.00 |

**dc019: I Felt Everything I Did Was An Effort**

|                                                      | Freq.  | %      |
|------------------------------------------------------|--------|--------|
| 1 Rarely or None (<1 Day)                            | 9,283  | 52.84  |
| 2 Some or A Little (1-2 Days)                        | 2,242  | 12.76  |
| 3 Occasionally or Moderate Amount of Time (3-4 Days) | 3,001  | 17.08  |
| 4 Most of the Time (5-7 Days)                        | 2,738  | 15.59  |
| 997 Don't Know                                       | 258    | 1.47   |
| 999 Refused                                          | 46     | 0.26   |
| Total                                                | 17,568 | 100.00 |

**dc020: I Felt Hopeful about the Future**

|                                                      | Freq.  | %      |
|------------------------------------------------------|--------|--------|
| 1 Rarely or None (<1 Day)                            | 5,188  | 29.53  |
| 2 Some or A Little (1-2 Days)                        | 1,870  | 10.64  |
| 3 Occasionally or Moderate Amount of Time (3-4 Days) | 3,375  | 19.21  |
| 4 Most of the Time (5-7 Days)                        | 6,364  | 36.22  |
| 997 Don't Know                                       | 708    | 4.03   |
| 999 Refused                                          | 63     | 0.36   |
| Total                                                | 17,568 | 100.00 |

**dc021: I Felt Fearful**

|                                                      | Freq.  | %      |
|------------------------------------------------------|--------|--------|
| 1 Rarely or None (<1 Day)                            | 13,636 | 77.62  |
| 2 Some or A Little (1-2 Days)                        | 1,273  | 7.25   |
| 3 Occasionally or Moderate Amount of Time (3-4 Days) | 1,599  | 9.10   |
| 4 Most of the Time (5-7 Days)                        | 940    | 5.35   |
| 997 Don't Know                                       | 91     | 0.52   |
| 999 Refused                                          | 28     | 0.16   |
| Total                                                | 17,567 | 100.00 |

**dc022: My Sleep Was Restless**

|                                                      | Freq. | %     |
|------------------------------------------------------|-------|-------|
| 1 Rarely or None (<1 Day)                            | 8,425 | 47.96 |
| 2 Some or A Little (1-2 Days)                        | 2,285 | 13.01 |
| 3 Occasionally or Moderate Amount of Time (3-4 Days) | 3,347 | 19.05 |
| 4 Most of the Time (5-7 Days)                        | 3,412 | 19.42 |
| 997 Don't Know                                       | 71    | 0.40  |
| 999 Refused                                          | 26    | 0.15  |

|       |        |        |
|-------|--------|--------|
| Total | 17,566 | 100.00 |
|-------|--------|--------|

**dc023: I Was Happy**

|                                                      | Freq.  | %      |
|------------------------------------------------------|--------|--------|
| 1 Rarely or None (<1 Day)                            | 3,643  | 20.74  |
| 2 Some or A Little (1-2 Days)                        | 1,745  | 9.93   |
| 3 Occasionally or Moderate Amount of Time (3-4 Days) | 3,993  | 22.73  |
| 4 Most of the Time (5-7 Days)                        | 7,961  | 45.32  |
| 997 Don't Know                                       | 183    | 1.04   |
| 999 Refused                                          | 41     | 0.23   |
| Total                                                | 17,566 | 100.00 |

**dc024: I Felt Lonely**

|                                                      | Freq.  | %      |
|------------------------------------------------------|--------|--------|
| 1 Rarely or None (<1 Day)                            | 12,251 | 69.74  |
| 2 Some or A Little (1-2 Days)                        | 1,500  | 8.54   |
| 3 Occasionally or Moderate Amount of Time (3-4 Days) | 2,076  | 11.82  |
| 4 Most of the Time (5-7 Days)                        | 1,482  | 8.44   |
| 997 Don't Know                                       | 216    | 1.23   |
| 999 Refused                                          | 41     | 0.23   |
| Total                                                | 17,566 | 100.00 |

**dc025: I Could Not Get on**

|                                                      | Freq.  | %      |
|------------------------------------------------------|--------|--------|
| 1 Rarely or None (<1 Day)                            | 13,335 | 75.91  |
| 2 Some or A Little (1-2 Days)                        | 1,158  | 6.59   |
| 3 Occasionally or Moderate Amount of Time (3-4 Days) | 1,579  | 8.99   |
| 4 Most of the Time (5-7 Days)                        | 1,140  | 6.49   |
| 997 Don't Know                                       | 298    | 1.70   |
| 999 Refused                                          | 56     | 0.32   |
| Total                                                | 17,566 | 100.00 |

**dc026: Life Satisfaction**

|                        | Freq.  | %      |
|------------------------|--------|--------|
| 1 Completely Satisfied | 860    | 4.90   |
| 2 Very Satisfied       | 5,394  | 30.71  |
| 3 Somewhat Satisfied   | 9,357  | 53.27  |
| 4 Not Very Satisfied   | 1,451  | 8.26   |
| 5 Not at All Satisfied | 504    | 2.87   |
| Total                  | 17,566 | 100.00 |

**dc027: Children Satisfaction**

|                        | Freq. | %     |
|------------------------|-------|-------|
| 1 Completely Satisfied | 1,229 | 7.12  |
| 2 Very Satisfied       | 8,044 | 46.58 |
| 3 Somewhat Satisfied   | 7,099 | 41.11 |
| 4 Not Very Satisfied   | 664   | 3.85  |

|                        |        |        |
|------------------------|--------|--------|
| 5 Not at All Satisfied | 212    | 1.23   |
| 6 No Child             | 21     | 0.12   |
| Total                  | 17,269 | 100.00 |

**dc028\_s1: Wordlist[1]**

|       | Freq.  | %      |
|-------|--------|--------|
| 0 No  | 8,830  | 53.21  |
| 1 Yes | 7,764  | 46.79  |
| Total | 16,594 | 100.00 |

**dc028\_s2: Wordlist[2]**

|       | Freq.  | %      |
|-------|--------|--------|
| 0 No  | 10,648 | 64.17  |
| 2 Yes | 5,946  | 35.83  |
| Total | 16,594 | 100.00 |

**dc028\_s3: Wordlist[3]**

|       | Freq.  | %      |
|-------|--------|--------|
| 0 No  | 8,056  | 48.55  |
| 3 Yes | 8,538  | 51.45  |
| Total | 16,594 | 100.00 |

**dc028\_s4: Wordlist[4]**

|       | Freq.  | %      |
|-------|--------|--------|
| 0 No  | 9,341  | 56.29  |
| 4 Yes | 7,253  | 43.71  |
| Total | 16,594 | 100.00 |

**dc028\_s5: Wordlist[5]**

|       | Freq.  | %      |
|-------|--------|--------|
| 0 No  | 6,074  | 36.60  |
| 5 Yes | 10,520 | 63.40  |
| Total | 16,594 | 100.00 |

**dc028\_s6: Wordlist[6]**

|       | Freq.  | %      |
|-------|--------|--------|
| 0 No  | 11,639 | 70.14  |
| 6 Yes | 4,955  | 29.86  |
| Total | 16,594 | 100.00 |

**dc028\_s7: Wordlist[7]**

|  | Freq. | % |
|--|-------|---|
|--|-------|---|

|       |        |        |
|-------|--------|--------|
| 0 No  | 7,861  | 47.37  |
| 7 Yes | 8,733  | 52.63  |
| Total | 16,594 | 100.00 |

## dc028\_s8: Wordlist[8]

|       | Freq.  | %      |
|-------|--------|--------|
| 0 No  | 7,392  | 44.55  |
| 8 Yes | 9,202  | 55.45  |
| Total | 16,594 | 100.00 |

## dc028\_s9: Wordlist[9]

|       | Freq.  | %      |
|-------|--------|--------|
| 0 No  | 6,373  | 38.41  |
| 9 Yes | 10,221 | 61.59  |
| Total | 16,594 | 100.00 |

## dc028\_s10: Wordlist[10]

|        | Freq.  | %      |
|--------|--------|--------|
| 0 No   | 8,336  | 50.24  |
| 10 Yes | 8,258  | 49.76  |
| Total  | 16,594 | 100.00 |

## dc028\_s11: None of the Above

|        | Freq.  | %      |
|--------|--------|--------|
| 0 No   | 14,880 | 89.67  |
| 11 Yes | 1,714  | 10.33  |
| Total  | 16,594 | 100.00 |

## dc028\_s12: Refused to Recall

|        | Freq.  | %      |
|--------|--------|--------|
| 0 No   | 16,312 | 98.30  |
| 12 Yes | 282    | 1.70   |
| Total  | 16,594 | 100.00 |

## dc029\_s1: Things Happened during Respondent Interview

|                      | Freq.  | %      |
|----------------------|--------|--------|
| 0 No                 | 17,200 | 97.92  |
| 1 R Had Poor Eysight | 366    | 2.08   |
| Total                | 17,566 | 100.00 |

## dc029\_s2: Things Happened during Respondent Interview

|  | Freq. | % |
|--|-------|---|
|--|-------|---|

|                                                  |        |        |
|--------------------------------------------------|--------|--------|
| 0 No                                             | 16,819 | 95.75  |
| 2 R Had Poor Hearing and Didn't Wear Hearing Aid | 747    | 4.25   |
| Total                                            | 17,566 | 100.00 |

**dc029\_s3: Things Happened during Respondent Interview**

|                      | Freq.  | %      |
|----------------------|--------|--------|
| 0 No                 | 17,521 | 99.74  |
| 3 R Wore Hearing Aid | 45     | 0.26   |
| Total                | 17,566 | 100.00 |

**dc029\_s4: Things Happened during Respondent Interview**

|                                                  | Freq.  | %      |
|--------------------------------------------------|--------|--------|
| 0 No                                             | 17,420 | 99.17  |
| 4 R Had Tremor Hand, Which Interfered Some Tests | 146    | 0.83   |
| Total                                            | 17,566 | 100.00 |

**dc029\_s5: Things Happened during Respondent Interview**

|                                                      | Freq.  | %      |
|------------------------------------------------------|--------|--------|
| 0 No                                                 | 16,516 | 94.02  |
| 5 Interview Was Interfered by Other Affairs or Noisy | 1,050  | 5.98   |
| Total                                                | 17,566 | 100.00 |

**dc029\_s6: Things Happened during Respondent Interview**

|                                              | Freq.  | %      |
|----------------------------------------------|--------|--------|
| 0 No                                         | 17,087 | 97.27  |
| 6 Quality Not Good for Emotion Problems of R | 479    | 2.73   |
| Total                                        | 17,566 | 100.00 |

**dc029\_s7: Things Happened during Respondent Interview**

|                          | Freq.  | %      |
|--------------------------|--------|--------|
| 0 No                     | 16,844 | 95.89  |
| 7 Others, Please Specify | 722    | 4.11   |
| Total                    | 17,566 | 100.00 |

**dc029\_s8: Things Happened during Respondent Interview**

|                     | Freq.  | %      |
|---------------------|--------|--------|
| 0 No                | 2,993  | 17.04  |
| 8 None of the Above | 14,573 | 82.96  |
| Total               | 17,566 | 100.00 |

**dc030: Language Used by Interviewers**

|  | Freq. | % |
|--|-------|---|
|--|-------|---|

|                                 |        |        |
|---------------------------------|--------|--------|
| 1 Mandarin                      | 9,343  | 53.19  |
| 2 Local Dialect                 | 7,285  | 41.47  |
| 3 Other Dialect, Please Specify | 938    | 5.34   |
| Total                           | 17,566 | 100.00 |

**xrage:** Age of Respondent

| Mean  | SD    | Min   | Max    | Obs    |
|-------|-------|-------|--------|--------|
| 61.56 | 10.07 | 18.00 | 108.00 | 19,367 |

**xrtype:** Respondent Type

|                 | Freq.  | %      |
|-----------------|--------|--------|
| 1 RE Interview  | 19,237 | 99.33  |
| 2 New Interview | 130    | 0.67   |
| Total           | 19,367 | 100.00 |

**xchrodistype\_1\_:** Name of Disease [1]

| A String Variable |        |
|-------------------|--------|
| Obs:              | 19,366 |

**xchrodistype\_2\_:** Name of Disease [2]

| A String Variable |        |
|-------------------|--------|
| Obs:              | 19,366 |

**xchrodistype\_3\_:** Name of Disease [3]

| A String Variable |        |
|-------------------|--------|
| Obs:              | 19,366 |

**xchrodistype\_4\_:** Name of Disease [4]

| A String Variable |        |
|-------------------|--------|
| Obs:              | 19,366 |

**xchrodistype\_5\_:** Name of Disease [5]

| A String Variable |        |
|-------------------|--------|
| Obs:              | 19,366 |

**xchrodistype\_6\_:** Name of Disease [6]

| A String Variable |        |
|-------------------|--------|
| Obs:              | 19,366 |



**xchrodistype\_7\_:** Name of Disease [7]

| A String Variable |        |
|-------------------|--------|
| Obs:              | 19,366 |

**xchrodistype\_8\_:** Name of Disease [8]

| A String Variable |        |
|-------------------|--------|
| Obs:              | 19,366 |

**xchrodistype\_9\_:** Name of Disease [9]

| A String Variable |        |
|-------------------|--------|
| Obs:              | 19,366 |

**xchrodistype\_10\_:** Name of Disease [10]

| A String Variable |        |
|-------------------|--------|
| Obs:              | 19,366 |

**xchrodistype\_11\_:** Name of Disease [11]

| A String Variable |        |
|-------------------|--------|
| Obs:              | 19,366 |

**xchrodistype\_12\_:** Name of Disease [12]

| A String Variable |        |
|-------------------|--------|
| Obs:              | 19,366 |

**xchrodistype\_13\_:** Name of Disease [13]

| A String Variable |        |
|-------------------|--------|
| Obs:              | 19,366 |

**xchrodistype\_14\_:** Name of Disease [14]

| A String Variable |        |
|-------------------|--------|
| Obs:              | 19,366 |

**xchrodistype\_15\_:** Name of Disease [15]

| A String Variable |        |
|-------------------|--------|
| Obs:              | 19,366 |

**xfagepossibility: Specific Life Expectancy**

| Mean  | SD   | Min   | Max    | Obs    |
|-------|------|-------|--------|--------|
| 78.50 | 5.67 | 75.00 | 115.00 | 17,662 |

**xpsyacttype\_1\_: Intensive Physical Activity**

| A String Variable |  |  |  |        |
|-------------------|--|--|--|--------|
| Obs:              |  |  |  | 19,355 |

**xpsyacttype\_2\_: Moderate Physical Activity**

| A String Variable |  |  |  |        |
|-------------------|--|--|--|--------|
| Obs:              |  |  |  | 19,355 |

**xpsyacttype\_3\_: Light Physical Activity**

| A String Variable |  |  |  |        |
|-------------------|--|--|--|--------|
| Obs:              |  |  |  | 19,355 |

**xsoctype\_1\_: Interacted With Friends**

| A String Variable |  |  |  |       |
|-------------------|--|--|--|-------|
| Obs:              |  |  |  | 6,186 |

**xsoctype\_2\_: Played Ma-jong, Played Chess, Played Cards, or Went to Community Club**

| A String Variable |  |  |  |       |
|-------------------|--|--|--|-------|
| Obs:              |  |  |  | 2,834 |

**xsoctype\_3\_: Provided Help to Family, Friends, or Neighbors Who Do Not Live With You**

| A String Variable |  |  |  |       |
|-------------------|--|--|--|-------|
| Obs:              |  |  |  | 2,989 |

**xsoctype\_4\_: Went to a Sport, Social, or Other Kind of Club**

| A String Variable |  |  |  |       |
|-------------------|--|--|--|-------|
| Obs:              |  |  |  | 1,328 |

**xsoctype\_5\_: Took Part in a Community-Related Organization**

| A String Variable |  |  |  |     |
|-------------------|--|--|--|-----|
| Obs:              |  |  |  | 460 |

**xsoctype\_6\_:** Done Voluntary or Charity work, or Cared for a Sick or Disabled Adult Who Does N

| A String Variable |     |
|-------------------|-----|
| Obs:              | 608 |

**xsoctype\_7\_:** Attended an Educational or Training Course

| A String Variable |     |
|-------------------|-----|
| Obs:              | 307 |

**xsoctype\_8\_:** Others

| A String Variable |     |
|-------------------|-----|
| Obs:              | 363 |

**xhelperselect:** Have Helper or Not

|       | Freq.  | %      |
|-------|--------|--------|
| 0 No  | 15,879 | 82.07  |
| 1 Yes | 3,468  | 17.93  |
| Total | 19,347 | 100.00 |

**xhelpernum:** Number of Helpers

| Mean | SD   | Min  | Max   | Obs   |
|------|------|------|-------|-------|
| 2.81 | 3.34 | 1.00 | 39.00 | 3,467 |

**xselectnum:** Numbers Selected

| Mean | SD   | Min  | Max  | Obs |
|------|------|------|------|-----|
| 7.00 | 0.00 | 7.00 | 7.00 | 247 |

**xhelpercurrent:** Have Helper in Current

|       | Freq.  | %      |
|-------|--------|--------|
| 0 No  | 15,879 | 82.08  |
| 1 Yes | 3,467  | 17.92  |
| Total | 19,346 | 100.00 |

**xwordlist\_1\_:** Wordlist[1]

| A String Variable |        |
|-------------------|--------|
| Obs:              | 17,570 |

**xwordlist\_2\_:** Wordlist[2]

|                   |  |        |
|-------------------|--|--------|
| A String Variable |  |        |
| Obs:              |  | 17,570 |

**xwordlist\_3\_:** Wordlist[3]

|                   |  |        |
|-------------------|--|--------|
| A String Variable |  |        |
| Obs:              |  | 17,570 |

**xwordlist\_4\_:** Wordlist[4]

|                   |  |        |
|-------------------|--|--------|
| A String Variable |  |        |
| Obs:              |  | 17,570 |

**xwordlist\_5\_:** Wordlist[5]

|                   |  |        |
|-------------------|--|--------|
| A String Variable |  |        |
| Obs:              |  | 17,570 |

**xwordlist\_6\_:** Wordlist[6]

|                   |  |        |
|-------------------|--|--------|
| A String Variable |  |        |
| Obs:              |  | 17,570 |

**xwordlist\_7\_:** Wordlist[7]

|                   |  |        |
|-------------------|--|--------|
| A String Variable |  |        |
| Obs:              |  | 17,570 |

**xwordlist\_8\_:** Wordlist[8]

|                   |  |        |
|-------------------|--|--------|
| A String Variable |  |        |
| Obs:              |  | 17,570 |

**xwordlist\_9\_:** Wordlist[9]

|                   |  |        |
|-------------------|--|--------|
| A String Variable |  |        |
| Obs:              |  | 17,570 |

**xwordlist\_10\_:** Wordlist[10]

|                   |  |        |
|-------------------|--|--------|
| A String Variable |  |        |
| Obs:              |  | 17,570 |

**xwordrecallbr:** Had Immediate WR test

|       | Freq.  | %      |
|-------|--------|--------|
| 0 No  | 972    | 5.53   |
| 1 Yes | 16,594 | 94.47  |
| Total | 17,566 | 100.00 |

**ziwtime:** R's LAST IW Time

| A String Variable |  |        |
|-------------------|--|--------|
| Obs:              |  | 19,237 |

**zsmoke:** Smoking in LAST IW Time

|       | Freq. | %      |
|-------|-------|--------|
| 1 Yes | 7,657 | 100.00 |
| Total | 7,657 | 100.00 |

**zchildnum:** Number of Children in LAST IW Time

| Mean | SD   | Min  | Max   | Obs    |
|------|------|------|-------|--------|
| 2.63 | 1.40 | 1.00 | 17.00 | 18,977 |

**zdisease\_1\_:** Had Doctor DIagnosed Disease[1] Listed in DA007 at ZIWTime

|       | Freq. | %      |
|-------|-------|--------|
| 1 Yes | 6,563 | 100.00 |
| Total | 6,563 | 100.00 |

**zdisease\_2\_:** Had Doctor DIagnosed Disease[2] Listed in DA007 at ZIWTime

|       | Freq. | %      |
|-------|-------|--------|
| 1 Yes | 3,726 | 100.00 |
| Total | 3,726 | 100.00 |

**zdisease\_3\_:** Had Doctor DIagnosed Disease[3] Listed in DA007 at ZIWTime

|       | Freq. | %      |
|-------|-------|--------|
| 1 Yes | 2,165 | 100.00 |
| Total | 2,165 | 100.00 |

**zdisease\_4\_:** Had Doctor DIagnosed Disease[4] Listed in DA007 at ZIWTime

|       | Freq. | %      |
|-------|-------|--------|
| 1 Yes | 337   | 100.00 |
| Total | 337   | 100.00 |

**zdisease\_5\_:** Had Doctor DIagnosed Disease[5] Listed in DA007 at ZIWTime

|       | Freq. | %      |
|-------|-------|--------|
| 1 Yes | 2,252 | 100.00 |
| Total | 2,252 | 100.00 |

**zdisese\_6\_:** Had Doctor DIagnosed Disease[6] Listed in DA007 at ZIWTime

|       | Freq. | %      |
|-------|-------|--------|
| 1 Yes | 1,137 | 100.00 |
| Total | 1,137 | 100.00 |

**zdisese\_7\_:** Had Doctor DIagnosed Disease[7] Listed in DA007 at ZIWTime

|       | Freq. | %      |
|-------|-------|--------|
| 1 Yes | 3,268 | 100.00 |
| Total | 3,268 | 100.00 |

**zdisese\_8\_:** Had Doctor DIagnosed Disease[8] Listed in DA007 at ZIWTime

|       | Freq. | %      |
|-------|-------|--------|
| 1 Yes | 1,189 | 100.00 |
| Total | 1,189 | 100.00 |

**zdisese\_9\_:** Had Doctor DIagnosed Disease[9] Listed in DA007 at ZIWTime

|       | Freq. | %      |
|-------|-------|--------|
| 1 Yes | 1,588 | 100.00 |
| Total | 1,588 | 100.00 |

**zdisese\_10\_:** Had Doctor DIagnosed Disease[10] Listed in DA007 at ZIWTime

|       | Freq. | %      |
|-------|-------|--------|
| 1 Yes | 5,303 | 100.00 |
| Total | 5,303 | 100.00 |

**zdisese\_11\_:** Had Doctor DIagnosed Disease[11] Listed in DA007 at ZIWTime

|       | Freq. | %      |
|-------|-------|--------|
| 1 Yes | 384   | 100.00 |
| Total | 384   | 100.00 |

**zdisese\_12\_:** Had Doctor DIagnosed Disease[12] Listed in DA007 at ZIWTime

|       | Freq. | %      |
|-------|-------|--------|
| 1 Yes | 17    | 100.00 |
| Total | 17    | 100.00 |

**zdisease\_13\_:** Had Doctor DIagnosed Disease[13] Listed in DA007 at ZIWTime

|       | Freq. | %      |
|-------|-------|--------|
| 1 Yes | 344   | 100.00 |
| Total | 344   | 100.00 |

**zdisease\_14\_:** Had Doctor DIagnosed Disease[14] Listed in DA007 at ZIWTime

|       | Freq. | %      |
|-------|-------|--------|
| 1 Yes | 6,530 | 100.00 |
| Total | 6,530 | 100.00 |

**zdisease\_15\_:** Had Doctor DIagnosed Disease[15] Listed in DA007 at ZIWTime

|       | Freq. | %      |
|-------|-------|--------|
| 1 Yes | 887   | 100.00 |
| Total | 887   | 100.00 |

**zselfdisease\_1\_:** Had only Self-known Disease[1] Listed in DA007 at ZIWTime

|       | Freq. | %      |
|-------|-------|--------|
| 1 Yes | 148   | 100.00 |
| Total | 148   | 100.00 |

**zselfdisease\_5\_:** Had only Self-known Disease[5] Listed in DA007 at ZIWTime

|       | Freq. | %      |
|-------|-------|--------|
| 1 Yes | 225   | 100.00 |
| Total | 225   | 100.00 |

**zselfdisease\_11\_:** Had only Self-known Disease[11] Listed in DA007 at ZIWTime

|       | Freq. | %      |
|-------|-------|--------|
| 1 Yes | 148   | 100.00 |
| Total | 148   | 100.00 |

**versionID:** Version ID

| A String Variable |  |        |
|-------------------|--|--------|
| Obs:              |  | 19,367 |

*This page intentionally left blank*



---

## Work and Retirement

---

ID: Individual ID

| A String Variable |        |
|-------------------|--------|
| Obs:              | 19,361 |

householdID: Household ID

| A String Variable |        |
|-------------------|--------|
| Obs:              | 19,361 |

communityID: Community ID

| A String Variable |        |
|-------------------|--------|
| Obs:              | 19,361 |

fa001: Has Farm Work

|       | Freq.  | %      |
|-------|--------|--------|
| 1 Yes | 9,062  | 46.81  |
| 2 No  | 10,297 | 53.19  |
| Total | 19,359 | 100.00 |

fa002\_s1: Farm Work Self-employed

|       | Freq. | %      |
|-------|-------|--------|
| 0 No  | 211   | 2.33   |
| 1 Yes | 8,851 | 97.67  |
| Total | 9,062 | 100.00 |

fa002\_s2: Farm Employed

|       | Freq. | %      |
|-------|-------|--------|
| 0 No  | 8,287 | 91.45  |
| 2 Yes | 775   | 8.55   |
| Total | 9,062 | 100.00 |

**fa004: Has Nonfarm Work**

|       | Freq.  | %      |
|-------|--------|--------|
| 1 Yes | 5,512  | 28.47  |
| 2 No  | 13,846 | 71.53  |
| Total | 19,358 | 100.00 |

**fa005: On Vacation**

|       | Freq.  | %      |
|-------|--------|--------|
| 1 Yes | 304    | 2.20   |
| 2 No  | 13,542 | 97.80  |
| Total | 13,846 | 100.00 |

**fa007: Expect to Return to the Job or Not**

|       | Freq. | %      |
|-------|-------|--------|
| 1 Yes | 223   | 73.36  |
| 2 No  | 81    | 26.64  |
| Total | 304   | 100.00 |

**fa008: Still Get Paid on the Job or Not**

|       | Freq. | %      |
|-------|-------|--------|
| 1 Yes | 10    | 12.35  |
| 2 No  | 71    | 87.65  |
| Total | 81    | 100.00 |

**fa009: Has More than One Nonfarm Job**

|       | Freq. | %      |
|-------|-------|--------|
| 1 Yes | 281   | 5.12   |
| 2 No  | 5,207 | 94.88  |
| Total | 5,488 | 100.00 |

**fa010: Main Job Employed or Self Employed**

|                                  | Freq. | %      |
|----------------------------------|-------|--------|
| 1 Employed Nonfarm               | 375   | 69.70  |
| 2 Self-employed Nonfarm          | 86    | 15.99  |
| 3 Unpaid Family Business Nonfarm | 15    | 2.79   |
| 4 Farm Employed                  | 62    | 11.52  |
| Total                            | 538   | 100.00 |

**fa011: Job Employed or Self-Employed**

|                                  | Freq. | %      |
|----------------------------------|-------|--------|
| 1 Employed Nonfarm               | 3,831 | 73.57  |
| 2 Self-employed Nonfarm          | 1,000 | 19.20  |
| 3 Unpaid Family Business Nonfarm | 376   | 7.22   |
| Total                            | 5,207 | 100.00 |

**fa013: Since When Started to Work After the LastIW**

|                      | Freq. | %      |
|----------------------|-------|--------|
| 1 Yes                | 607   | 39.99  |
| 995 Deny             | 876   | 57.71  |
| 999 Refuse to Answer | 35    | 2.31   |
| Total                | 1,518 | 100.00 |

**fa013\_1: Year (When Started to Work since the LastIW)**

| Mean     | SD   | Min      | Max      | Obs |
|----------|------|----------|----------|-----|
| 2,019.08 | 0.96 | 2,014.00 | 2,020.00 | 607 |

**fa013\_2: Month (When Started to Work since the LastIW)**

| Mean | SD   | Min  | Max   | Obs |
|------|------|------|-------|-----|
| 5.72 | 2.97 | 1.00 | 12.00 | 551 |

**fa014: Double Check on FA013**

|                 | Freq. | %      |
|-----------------|-------|--------|
| 1 Yes           | 871   | 99.43  |
| 997 Do not Know | 5     | 0.57   |
| Total           | 876   | 100.00 |

**fa015: Reason to Start to Work**

|                    | Freq. | %      |
|--------------------|-------|--------|
| More Income        | 365   | 60.13  |
| Better Health      | 36    | 5.93   |
| Family Issues      | 38    | 6.26   |
| As Workout         | 51    | 8.40   |
| No Specific Reason | 40    | 6.59   |
| Others             | 77    | 12.69  |
| Total              | 607   | 100.00 |

**fa016: Since When Stopped Working After the LastIW**

|                      | Freq. | %     |
|----------------------|-------|-------|
| 1 Yes                | 1,277 | 73.82 |
| 995 Deny             | 415   | 23.99 |
| 999 Refuse to Answer | 38    | 2.20  |

|       |       |        |
|-------|-------|--------|
| Total | 1,730 | 100.00 |
|-------|-------|--------|

**fa016\_1: Year (Since When Stopped Working)**

| Mean     | SD   | Min      | Max      | Obs   |
|----------|------|----------|----------|-------|
| 2,018.78 | 1.12 | 2,011.00 | 2,020.00 | 1,278 |

**fa016\_2: Month (Since When Stopped Working)**

| Mean | SD   | Min  | Max   | Obs   |
|------|------|------|-------|-------|
| 5.98 | 3.50 | 1.00 | 12.00 | 1,158 |

**fa017: Double Check on FA016**

|                 | Freq. | %      |
|-----------------|-------|--------|
| 1 Yes           | 412   | 99.28  |
| 997 Do not Know | 3     | 0.72   |
| Total           | 415   | 100.00 |

**fa018\_1: Year (Since When Stopped Working if not Worked in the LastIW)**

| Mean     | SD   | Min      | Max      | Obs |
|----------|------|----------|----------|-----|
| 2,011.47 | 7.24 | 1,980.00 | 2,020.00 | 415 |

**fa018\_2: Month (Since When Stopped Working if not Worked in the LastIW)**

| Mean | SD   | Min  | Max   | Obs |
|------|------|------|-------|-----|
| 5.68 | 3.54 | 1.00 | 12.00 | 226 |

**fa019: Reason to Stop Working**

|                      | Freq. | %      |
|----------------------|-------|--------|
| External Reason      | 80    | 4.73   |
| Inadequate Income    | 60    | 3.55   |
| Inconvenience        | 26    | 1.54   |
| Health Issues        | 789   | 46.63  |
| Family Issues        | 360   | 21.28  |
| Retirement           | 136   | 8.04   |
| Temporary Suspension | 17    | 1.00   |
| Others               | 224   | 13.24  |
| Total                | 1,692 | 100.00 |

**fb001: Location of farm work**

|                                                         | Freq. | %     |
|---------------------------------------------------------|-------|-------|
| 1 Same as the Residence                                 | 8,097 | 91.48 |
| 2 Another Neighborhood but Same County as the Residence | 379   | 4.28  |
| 3 Other Domestic Location                               | 367   | 4.15  |
| 4 Abroad                                                | 3     | 0.03  |

|                      |       |        |
|----------------------|-------|--------|
| 999 Refuse to Answer | 5     | 0.06   |
| Total                | 8,851 | 100.00 |

**fb002\_s1: Industry: Plantation**

|       | Freq. | %      |
|-------|-------|--------|
| 0 No  | 426   | 4.81   |
| 1 Yes | 8,424 | 95.19  |
| Total | 8,850 | 100.00 |

**fb002\_s2: Industry: Forestry**

|       | Freq. | %      |
|-------|-------|--------|
| 0 No  | 8,180 | 92.43  |
| 2 Yes | 670   | 7.57   |
| Total | 8,850 | 100.00 |

**fb002\_s3: Industry: Husbandry**

|       | Freq. | %      |
|-------|-------|--------|
| 0 No  | 5,170 | 58.42  |
| 3 Yes | 3,680 | 41.58  |
| Total | 8,850 | 100.00 |

**fb002\_s4: Industry: Fishing**

|       | Freq. | %      |
|-------|-------|--------|
| 0 No  | 8,559 | 96.71  |
| 4 Yes | 291   | 3.29   |
| Total | 8,850 | 100.00 |

**fb002\_s5: Industry: Farming Technology**

|       | Freq. | %      |
|-------|-------|--------|
| 0 No  | 8,806 | 99.50  |
| 5 Yes | 44    | 0.50   |
| Total | 8,850 | 100.00 |

**fb002\_s997: Do not Know**

|         | Freq. | %      |
|---------|-------|--------|
| 0 No    | 8,848 | 99.98  |
| 997 Yes | 2     | 0.02   |
| Total   | 8,850 | 100.00 |

**fb003: Type (Occupation) of the Household Farm Work**

|  | Freq. | % |
|--|-------|---|
|--|-------|---|

|                            |       |        |
|----------------------------|-------|--------|
| 1 Manual Labor             | 8,405 | 94.97  |
| 2 Management               | 163   | 1.84   |
| 3 Machine/Vehicle Operator | 166   | 1.88   |
| 4 Sales                    | 51    | 0.58   |
| 5 Other                    | 65    | 0.73   |
| Total                      | 8,850 | 100.00 |

**fb005: Months for Household Farm Work**

| Mean | SD   | Min  | Max   | Obs   |
|------|------|------|-------|-------|
| 7.20 | 4.29 | 1.00 | 12.00 | 8,850 |

**fb006: Days for Household Farm Work**

| Mean | SD   | Min  | Max  | Obs   |
|------|------|------|------|-------|
| 4.63 | 2.21 | 1.00 | 7.00 | 8,850 |

**fb007: Hours for Household Farm Work**

| Mean | SD   | Min  | Max   | Obs   |
|------|------|------|-------|-------|
| 5.39 | 3.00 | 1.00 | 24.00 | 8,850 |

**fc001: Receive Wage from the Workplace or Dispatch Company**

|                    | Freq. | %      |
|--------------------|-------|--------|
| 1 Workplace        | 3,648 | 76.24  |
| 2 Dispatch Company | 155   | 3.24   |
| 3 Individual       | 982   | 20.52  |
| Total              | 4,785 | 100.00 |

**fc002: Type of the Employer**

|                        | Freq. | %      |
|------------------------|-------|--------|
| 1 Government           | 424   | 8.86   |
| 2 Institutions         | 365   | 7.63   |
| 3 NGO                  | 27    | 0.56   |
| 4 Firm                 | 1,338 | 27.96  |
| 5 Individual Firm      | 1,754 | 36.66  |
| 6 Farmer               | 545   | 11.39  |
| 7 Individual Household | 127   | 2.65   |
| 8 Other                | 99    | 2.07   |
| 997 Do not Know        | 106   | 2.22   |
| Total                  | 4,785 | 100.00 |

**fc003: Same Employer as in the LastIW**

|          | Freq. | %     |
|----------|-------|-------|
| 1 Yes    | 1,712 | 62.69 |
| 2 No     | 972   | 35.59 |
| 995 Deny | 47    | 1.72  |

|       |       |        |
|-------|-------|--------|
| Total | 2,731 | 100.00 |
|-------|-------|--------|

**fc004: Location of the Workplace**

|                                                         | Freq. | %      |
|---------------------------------------------------------|-------|--------|
| 1 Same as the Residence                                 | 2,657 | 55.53  |
| 2 Another Neighborhood but Same County as the Residence | 1,518 | 31.72  |
| 3 Other Domestic Location                               | 531   | 11.10  |
| 4 Abroad                                                | 56    | 1.17   |
| 999 Refuse to Answer                                    | 23    | 0.48   |
| Total                                                   | 4,785 | 100.00 |

**fc006: Civil Servant or Not**

|       | Freq. | %      |
|-------|-------|--------|
| 1 Yes | 50    | 11.79  |
| 2 No  | 374   | 88.21  |
| Total | 424   | 100.00 |

**fc008: Formal Employee or Not**

|       | Freq. | %      |
|-------|-------|--------|
| 1 Yes | 198   | 54.25  |
| 2 No  | 167   | 45.75  |
| Total | 365   | 100.00 |

**fc012: Supervise Anyone or Not**

|       | Freq. | %      |
|-------|-------|--------|
| 1 Yes | 581   | 12.14  |
| 2 No  | 4,204 | 87.86  |
| Total | 4,785 | 100.00 |

**fc016: Has Any Written Labor Contract with the Current Employer or Not**

|       | Freq. | %      |
|-------|-------|--------|
| 1 Yes | 1,167 | 24.39  |
| 2 No  | 3,618 | 75.61  |
| Total | 4,785 | 100.00 |

**fc017: Labor Contract Period**

|                                   | Freq. | %      |
|-----------------------------------|-------|--------|
| 1 Defined Preiod                  | 714   | 61.18  |
| 2 Not Defined                     | 329   | 28.19  |
| 3 Same as the Term of the Project | 63    | 5.40   |
| 997 Do not Know                   | 61    | 5.23   |
| Total                             | 1,167 | 100.00 |

**fc017\_1: Year**

| Mean | SD   | Min  | Max   | Obs |
|------|------|------|-------|-----|
| 2.09 | 3.21 | 0.00 | 44.00 | 691 |

**fc017\_2: Month**

| Mean | SD   | Min  | Max  | Obs |
|------|------|------|------|-----|
| 0.28 | 1.23 | 0.00 | 9.00 | 684 |

**fc018: Double Check on the Time When Started Working for This Employer**

|                      | Freq. | %      |
|----------------------|-------|--------|
| 1 Yes                | 1,540 | 87.80  |
| 2 No                 | 209   | 11.92  |
| 999 Refuse to Answer | 5     | 0.29   |
| Total                | 1,754 | 100.00 |

**fc018\_1: Year**

| Mean     | SD   | Min      | Max      | Obs |
|----------|------|----------|----------|-----|
| 2,014.41 | 8.27 | 1,985.00 | 2,020.00 | 201 |

**fc018\_2: Month**

| Mean | SD   | Min  | Max   | Obs |
|------|------|------|-------|-----|
| 5.66 | 3.04 | 1.00 | 12.00 | 189 |

**fc019\_1: When Did You Start Working for This Employer(Year)**

| Mean     | SD   | Min      | Max      | Obs   |
|----------|------|----------|----------|-------|
| 2,017.52 | 6.38 | 1,964.00 | 2,020.00 | 2,875 |

**fc019\_2: When Did You Start Working for This Employer(Month)**

| Mean | SD   | Min  | Max   | Obs   |
|------|------|------|-------|-------|
| 5.67 | 2.63 | 1.00 | 12.00 | 2,675 |

**fc025: Months of Working in the Past Year**

| Mean | SD   | Min  | Max   | Obs   |
|------|------|------|-------|-------|
| 7.34 | 4.23 | 1.00 | 12.00 | 4,784 |

**fc026: Days of Working per Week**

| Mean | SD | Min | Max | Obs |
|------|----|-----|-----|-----|
|------|----|-----|-----|-----|



|      |      |      |      |       |
|------|------|------|------|-------|
| 5.37 | 1.86 | 1.00 | 7.00 | 4,784 |
|------|------|------|------|-------|

**fc027: Hours of Working per Day**

| Mean | SD   | Min  | Max   | Obs   |
|------|------|------|-------|-------|
| 8.64 | 3.02 | 1.00 | 24.00 | 4,784 |

**fc032: Periodic Pattern of Wage Payment**

|                      | Freq. | %      |
|----------------------|-------|--------|
| 1 Yearly Pay         | 328   | 6.86   |
| 2 Monthly Pay        | 2,523 | 52.74  |
| 3 Weekly Pay         | 12    | 0.25   |
| 4 Daily Pay          | 782   | 16.35  |
| 5 Hourly Pay         | 134   | 2.80   |
| 6 Contract-based     | 302   | 6.31   |
| 7 Performance-based  | 405   | 8.47   |
| 8 Other              | 264   | 5.52   |
| 997 Do not Know      | 32    | 0.67   |
| 999 Refuse to Answer | 2     | 0.04   |
| Total                | 4,784 | 100.00 |

**fc033: Annual Salary**

| Mean      | SD        | Min  | Max        | Obs |
|-----------|-----------|------|------------|-----|
| 22,817.66 | 21,569.12 | 0.00 | 150,000.00 | 319 |

**fc034: Monthly Salary**

| Mean     | SD       | Min  | Max       | Obs   |
|----------|----------|------|-----------|-------|
| 3,372.68 | 3,049.14 | 0.00 | 70,000.00 | 2,479 |

**fc035: Weekly Salary**

| Mean   | SD     | Min  | Max      | Obs |
|--------|--------|------|----------|-----|
| 806.67 | 713.37 | 0.00 | 2,000.00 | 12  |

**fc036: Daily Salary**

| Mean   | SD    | Min   | Max    | Obs |
|--------|-------|-------|--------|-----|
| 134.72 | 72.93 | 10.00 | 700.00 | 774 |

**fc037: Hourly Salary**

| Mean  | SD    | Min  | Max    | Obs |
|-------|-------|------|--------|-----|
| 15.29 | 15.32 | 5.00 | 100.00 | 129 |

**fc038: Estimated Monthly Salary**

| Mean     | SD       | Min  | Max       | Obs   |
|----------|----------|------|-----------|-------|
| 2,252.87 | 2,405.05 | 0.00 | 20,000.00 | 1,823 |

**fc039: All Other Bonuses Last Year**

| Mean     | SD        | Min  | Max        | Obs   |
|----------|-----------|------|------------|-------|
| 2,186.53 | 11,203.57 | 0.00 | 200,000.00 | 4,702 |

**fc040: Salary Reported Net Tax**

|                          | Freq. | %      |
|--------------------------|-------|--------|
| Taxable and Deducted     | 734   | 15.35  |
| Taxable but not Deducted | 398   | 8.32   |
| Not Taxable              | 3,556 | 74.35  |
| 997 Do not Know          | 94    | 1.97   |
| 999 Refuse to Answer     | 1     | 0.02   |
| Total                    | 4,783 | 100.00 |

**fc041: Payroll Tax**

|                 | Freq. | %      |
|-----------------|-------|--------|
| Percentage      | 200   | 17.67  |
| Monthly Payment | 400   | 35.34  |
| Yearly Payment  | 292   | 25.80  |
| 997 Do not Know | 240   | 21.20  |
| Total           | 1,132 | 100.00 |

**fc041\_1: Percentage**

| Mean  | SD    | Min  | Max   | Obs |
|-------|-------|------|-------|-----|
| 14.41 | 10.90 | 1.00 | 50.00 | 200 |

**fc041\_2: Monthly Tax**

| Mean     | SD     | Min    | Max      | Obs |
|----------|--------|--------|----------|-----|
| 1,018.20 | 976.34 | 100.00 | 6,100.00 | 400 |

**fc041\_3: Yearly Tax**

| Mean     | SD       | Min    | Max        | Obs |
|----------|----------|--------|------------|-----|
| 2,922.35 | 8,845.16 | 100.00 | 100,000.00 | 292 |

**fc042\_s1: Meal**

|       | Freq. | %     |
|-------|-------|-------|
| 0 No  | 3,133 | 65.50 |
| 1 Yes | 1,650 | 34.50 |

|       |       |        |
|-------|-------|--------|
| Total | 4,783 | 100.00 |
|-------|-------|--------|

**fc042\_s2: Transportation**

|       | Freq. | %      |
|-------|-------|--------|
| 0 No  | 4,478 | 93.62  |
| 2 Yes | 305   | 6.38   |
| Total | 4,783 | 100.00 |

**fc042\_s3: Housing**

|       | Freq. | %      |
|-------|-------|--------|
| 0 No  | 3,964 | 82.88  |
| 3 Yes | 819   | 17.12  |
| Total | 4,783 | 100.00 |

**fc042\_s4: Others**

|       | Freq. | %      |
|-------|-------|--------|
| 0 No  | 4,376 | 91.49  |
| 4 Yes | 407   | 8.51   |
| Total | 4,783 | 100.00 |

**fc042\_s5: No Benefits**

|       | Freq. | %      |
|-------|-------|--------|
| 0 No  | 2,245 | 46.94  |
| 5 Yes | 2,538 | 53.06  |
| Total | 4,783 | 100.00 |

**fc042\_s999: Do not Know**

|         | Freq. | %      |
|---------|-------|--------|
| 0 No    | 4,753 | 99.37  |
| 999 Yes | 30    | 0.63   |
| Total   | 4,783 | 100.00 |

**fc042\_1: Meal Benefits**

| Mean   | SD     | Min   | Max      | Obs   |
|--------|--------|-------|----------|-------|
| 368.40 | 353.62 | 10.00 | 3,000.00 | 1,514 |

**fc042\_2: Transportation Benefits**

| Mean   | SD       | Min   | Max       | Obs |
|--------|----------|-------|-----------|-----|
| 547.32 | 1,019.29 | 10.00 | 10,000.00 | 254 |

**fc042\_3: Housing Benefits**

| Mean   | SD       | Min   | Max        | Obs |
|--------|----------|-------|------------|-----|
| 720.76 | 4,139.25 | 10.00 | 100,000.00 | 598 |

**fc042\_4: Other Benefits not Mentioned Above**

| Mean   | SD     | Min   | Max       | Obs |
|--------|--------|-------|-----------|-----|
| 271.30 | 855.06 | 10.00 | 10,000.00 | 370 |

**fd002: Location of the Self Employment Business**

|                                                         | Freq. | %      |
|---------------------------------------------------------|-------|--------|
| 1 Same as the Residence                                 | 1,174 | 79.49  |
| 2 Another Neighborhood but Same County as the Residence | 210   | 14.22  |
| 3 Other Domestic Location                               | 72    | 4.87   |
| 4 Abroad                                                | 17    | 1.15   |
| 999 Refuse to Answer                                    | 4     | 0.27   |
| Total                                                   | 1,477 | 100.00 |

**fd004: Number of Employees**

| Mean | SD   | Min  | Max    | Obs   |
|------|------|------|--------|-------|
| 1.73 | 9.01 | 0.00 | 200.00 | 1,477 |

**fd007: Months of Working in the Past Year**

| Mean | SD   | Min  | Max   | Obs   |
|------|------|------|-------|-------|
| 8.98 | 3.65 | 1.00 | 12.00 | 1,477 |

**fd008: Days of Working per Week**

| Mean | SD   | Min  | Max  | Obs   |
|------|------|------|------|-------|
| 5.73 | 1.90 | 1.00 | 7.00 | 1,477 |

**fd009: Hours of Working per Day**

| Mean | SD   | Min  | Max   | Obs   |
|------|------|------|-------|-------|
| 7.62 | 4.00 | 1.00 | 24.00 | 1,477 |

**fe001: Days of Working on Side Jobs per Week**

| Mean | SD   | Min  | Max  | Obs |
|------|------|------|------|-----|
| 4.45 | 2.35 | 0.00 | 7.00 | 537 |

**fe002: Hours of Working on Side Jobs per Day**

| Mean | SD   | Min  | Max   | Obs |
|------|------|------|-------|-----|
| 6.92 | 3.54 | 1.00 | 24.00 | 537 |

**ff001: Total Days of Working Last Year**

| Mean   | SD     | Min  | Max    | Obs    |
|--------|--------|------|--------|--------|
| 140.21 | 137.50 | 0.00 | 366.00 | 19,028 |

**ff002: Has Recreational Work**

|       | Freq. | %      |
|-------|-------|--------|
| 1 Yes | 172   | 2.49   |
| 2 No  | 6,734 | 97.51  |
| Total | 6,906 | 100.00 |

**ff003: Did You Search for a Job Last Month**

|       | Freq. | %      |
|-------|-------|--------|
| 1 Yes | 137   | 1.98   |
| 2 No  | 6,769 | 98.02  |
| Total | 6,906 | 100.00 |

**ff004: Expected Time to Stop Working**

|                           | Freq.  | %      |
|---------------------------|--------|--------|
| Until an Age              | 3,062  | 24.33  |
| After Some Years          | 750    | 5.96   |
| Nonstop Given Good Health | 8,484  | 67.42  |
| 997 Do not Know           | 281    | 2.23   |
| 999 Refuse to Answer      | 7      | 0.06   |
| Total                     | 12,584 | 100.00 |

**ff004\_1: Age by Then to Stop Working**

| Mean  | SD   | Min   | Max    | Obs   |
|-------|------|-------|--------|-------|
| 64.91 | 7.08 | 46.00 | 100.00 | 3,062 |

**ff004\_2: Number of Years to Continue Working**

| Mean | SD   | Min  | Max   | Obs |
|------|------|------|-------|-----|
| 2.86 | 3.07 | 0.00 | 20.00 | 746 |

**ff005: Expected Time to Stop Working Affected by the Pandemic**

|                 | Freq. | %    |
|-----------------|-------|------|
| # Years Earlier | 245   | 1.77 |
| # Years Delayed | 414   | 2.99 |

|                      |        |        |
|----------------------|--------|--------|
| Not Affected         | 12,948 | 93.61  |
| 997 Do not Know      | 216    | 1.56   |
| 999 Refuse to Answer | 9      | 0.07   |
| Total                | 13,832 | 100.00 |

**ff005\_1: Number of Years Earlier**

| Mean | SD   | Min  | Max   | Obs |
|------|------|------|-------|-----|
| 3.80 | 3.16 | 1.00 | 30.00 | 208 |

**ff005\_2: Number of Years Delayed**

| Mean | SD   | Min  | Max   | Obs |
|------|------|------|-------|-----|
| 2.86 | 2.22 | 1.00 | 20.00 | 344 |

**fg001: Work at Home During the Pandemic**

|       | Freq.  | %      |
|-------|--------|--------|
| 1 Yes | 463    | 3.59   |
| 2 No  | 12,431 | 96.41  |
| Total | 12,894 | 100.00 |

**fg002: Got Paid Even not Working During the Pandemic**

|                  | Freq.  | %      |
|------------------|--------|--------|
| 1 Yes, Paid Less | 421    | 3.27   |
| 2 Yes, Paid More | 2      | 0.02   |
| 3 No             | 12,471 | 96.72  |
| Total            | 12,894 | 100.00 |

**fg002\_1: Percentage**

| Mean  | SD    | Min  | Max    | Obs |
|-------|-------|------|--------|-----|
| 77.12 | 28.77 | 1.00 | 100.00 | 405 |

**fg002\_2: Duration**

| Mean | SD   | Min  | Max   | Obs |
|------|------|------|-------|-----|
| 7.01 | 5.28 | 1.00 | 30.00 | 407 |

**fg003: Self-Employed Farming Affected by the Pandemic**

|                                         | Freq. | %     |
|-----------------------------------------|-------|-------|
| Would not Have This Type of Work Anyway | 3,213 | 24.92 |
| Worked Less                             | 1,965 | 15.24 |
| Worked More                             | 188   | 1.46  |
| Not Affected                            | 7,501 | 58.17 |
| 999 Refuse to Answer                    | 27    | 0.21  |

|       |        |        |
|-------|--------|--------|
| Total | 12,894 | 100.00 |
|-------|--------|--------|

**fg003\_1: Number of More Weeks**

| Mean | SD   | Min  | Max   | Obs   |
|------|------|------|-------|-------|
| 5.43 | 4.08 | 1.00 | 32.00 | 1,850 |

**fg003\_2: Number of Fewer Weeks**

| Mean | SD   | Min  | Max   | Obs |
|------|------|------|-------|-----|
| 4.03 | 3.85 | 1.00 | 27.00 | 180 |

**fg004: Employed Work Affected by the Pandemic**

|                                         | Freq.  | %      |
|-----------------------------------------|--------|--------|
| Would not Have This Type of Work Anyway | 6,414  | 49.74  |
| Worked Less                             | 3,273  | 25.38  |
| Worked More                             | 139    | 1.08   |
| Not Affected                            | 3,046  | 23.62  |
| 999 Refuse to Answer                    | 22     | 0.17   |
| Total                                   | 12,894 | 100.00 |

**fg004\_1: Number of More Weeks**

| Mean | SD   | Min  | Max   | Obs   |
|------|------|------|-------|-------|
| 8.29 | 5.63 | 1.00 | 34.00 | 3,144 |

**fg004\_2: Number of Fewer Weeks**

| Mean | SD   | Min  | Max   | Obs |
|------|------|------|-------|-----|
| 5.34 | 4.50 | 1.00 | 24.00 | 128 |

**fg005: Self-Employed Work Affected by the Pandemic**

|                                            | Freq.  | %      |
|--------------------------------------------|--------|--------|
| Not Affected                               | 10,092 | 78.28  |
| Worked Less                                | 1,433  | 11.11  |
| Worked More                                | 20     | 0.16   |
| Having not Worked After the Lunar New Year | 1,340  | 10.39  |
| 999 Refuse to Answer                       | 8      | 0.06   |
| Total                                      | 12,893 | 100.00 |

**fg005\_1: Number of More Weeks**

| Mean | SD   | Min  | Max   | Obs   |
|------|------|------|-------|-------|
| 9.04 | 5.84 | 1.00 | 34.00 | 1,400 |

**fg005\_2: Number of Fewer Weeks**

| Mean | SD   | Min  | Max   | Obs |
|------|------|------|-------|-----|
| 7.50 | 6.59 | 1.00 | 24.00 | 20  |

**fg008: Work Hours Affected by the Pandemic**

| Mean | SD    | Min  | Max    | Obs    |
|------|-------|------|--------|--------|
| 4.36 | 51.91 | 1.00 | 999.00 | 12,893 |

**fg008\_1: Number of More Hours per Week**

| Mean  | SD    | Min  | Max   | Obs   |
|-------|-------|------|-------|-------|
| 12.45 | 10.24 | 1.00 | 40.00 | 1,645 |

**fg008\_2: Number of Fewer Hours per Week**

| Mean  | SD   | Min  | Max   | Obs |
|-------|------|------|-------|-----|
| 11.08 | 8.73 | 1.00 | 40.00 | 338 |

**fg009: Unemployment Insurance Received During the Pandemic**

|       | Freq.  | %      |
|-------|--------|--------|
| 1 Yes | 17     | 0.13   |
| 2 No  | 12,876 | 99.87  |
| Total | 12,893 | 100.00 |

**fg010\_1: Months of Payment**

| Mean | SD   | Min  | Max  | Obs |
|------|------|------|------|-----|
| 4.47 | 2.42 | 1.00 | 8.00 | 15  |

**fg010\_2: Monthly Payment**

| Mean     | SD     | Min   | Max      | Obs |
|----------|--------|-------|----------|-----|
| 1,173.94 | 839.14 | 19.00 | 2,640.00 | 16  |

**fh001: Retirement Processed**

|       | Freq.  | %      |
|-------|--------|--------|
| 1 Yes | 787    | 4.70   |
| 2 No  | 15,955 | 95.30  |
| Total | 16,742 | 100.00 |

**fh002: Type of Retirement**

|  | Freq. | % |
|--|-------|---|
|--|-------|---|



|                                                   |     |        |
|---------------------------------------------------|-----|--------|
| Formal Retirement                                 | 705 | 89.58  |
| Early Retirement                                  | 54  | 6.86   |
| Internal Retirement First Then Formal Retirement  | 22  | 2.80   |
| Internal Retirement but Not Yet Formal Retirement | 6   | 0.76   |
| Total                                             | 787 | 100.00 |

**fh003\_1: Year of Retirement**

| Mean     | SD   | Min      | Max      | Obs |
|----------|------|----------|----------|-----|
| 2,012.15 | 8.45 | 1,972.00 | 2,020.00 | 722 |

**fh003\_2: Month**

| Mean | SD   | Min  | Max   | Obs |
|------|------|------|-------|-----|
| 6.93 | 3.48 | 1.00 | 12.00 | 658 |

**fh004\_1: Expected Year of Retirement**

| Mean     | SD   | Min      | Max      | Obs |
|----------|------|----------|----------|-----|
| 2,022.17 | 2.56 | 2,020.00 | 2,026.00 | 6   |

**fh004\_2: Expected Month**

| Mean | SD   | Min  | Max   | Obs |
|------|------|------|-------|-----|
| 7.83 | 4.02 | 2.00 | 12.00 | 6   |

**ff001\_min: FF001 Min**

| Mean   | SD    | Min   | Max    | Obs |
|--------|-------|-------|--------|-----|
| 102.49 | 86.24 | -1.00 | 250.00 | 318 |

**ff001\_max: FF001 Max**

| Mean   | SD    | Min   | Max    | Obs |
|--------|-------|-------|--------|-----|
| 104.16 | 90.34 | -1.00 | 250.00 | 296 |

**fc036\_min: FC036 Min**

| Mean   | SD    | Min   | Max    | Obs |
|--------|-------|-------|--------|-----|
| 114.88 | 80.03 | -1.00 | 200.00 | 8   |

**fc036\_max: FC036 Max**

| Mean   | SD     | Min   | Max    | Obs |
|--------|--------|-------|--------|-----|
| 181.13 | 151.21 | -1.00 | 500.00 | 8   |

**fc038\_min: FC038 Min**

| Mean     | SD       | Min   | Max      | Obs |
|----------|----------|-------|----------|-----|
| 1,037.64 | 1,291.11 | -1.00 | 5,000.00 | 92  |

**fc038\_max: FC038 Max**

| Mean     | SD       | Min   | Max       | Obs |
|----------|----------|-------|-----------|-----|
| 1,427.59 | 1,954.08 | -1.00 | 10,000.00 | 111 |

**fc039\_min: FC039 Min**

| Mean     | SD       | Min   | Max       | Obs |
|----------|----------|-------|-----------|-----|
| 1,844.61 | 3,120.02 | -1.00 | 20,000.00 | 71  |

**fc039\_max: FC039 Max**

| Mean     | SD       | Min   | Max       | Obs |
|----------|----------|-------|-----------|-----|
| 2,562.11 | 3,543.31 | -1.00 | 20,000.00 | 80  |

**fc034\_min: FC034 Min**

| Mean     | SD       | Min   | Max      | Obs |
|----------|----------|-------|----------|-----|
| 1,768.90 | 1,831.52 | -1.00 | 5,000.00 | 39  |

**fc034\_max: FC034 Max**

| Mean     | SD       | Min   | Max       | Obs |
|----------|----------|-------|-----------|-----|
| 2,604.33 | 3,058.37 | -1.00 | 10,000.00 | 43  |

**fc042\_2\_min: FC042\_2 Min**

| Mean   | SD     | Min   | Max      | Obs |
|--------|--------|-------|----------|-----|
| 165.45 | 279.50 | -1.00 | 1,000.00 | 47  |

**fc042\_2\_max: FC042\_2 Max**

| Mean   | SD     | Min   | Max      | Obs |
|--------|--------|-------|----------|-----|
| 258.67 | 362.04 | -1.00 | 1,000.00 | 49  |

**fc042\_1\_min: FC042\_1 Min**

| Mean   | SD     | Min   | Max      | Obs |
|--------|--------|-------|----------|-----|
| 207.15 | 287.73 | -1.00 | 1,000.00 | 118 |

**fc042\_1\_max: FC042\_1 Max**

| Mean   | SD     | Min   | Max      | Obs |
|--------|--------|-------|----------|-----|
| 287.55 | 350.68 | -1.00 | 1,000.00 | 133 |

**fc042\_3\_min:** FC042\_3 Min

| Mean   | SD     | Min   | Max      | Obs |
|--------|--------|-------|----------|-----|
| 381.76 | 800.24 | -1.00 | 5,000.00 | 170 |

**fc042\_3\_max:** FC042\_3 Max

| Mean   | SD       | Min   | Max      | Obs |
|--------|----------|-------|----------|-----|
| 675.27 | 1,063.10 | -1.00 | 5,000.00 | 222 |

**fc042\_4\_min:** FC042\_4 Min

| Mean  | SD    | Min   | Max    | Obs |
|-------|-------|-------|--------|-----|
| 62.13 | 49.95 | -1.00 | 100.00 | 24  |

**fc042\_4\_max:** FC042\_4 Max

| Mean   | SD     | Min   | Max    | Obs |
|--------|--------|-------|--------|-----|
| 218.70 | 213.45 | -1.00 | 500.00 | 37  |

**fc033\_min:** FC033 Min

| Mean      | SD        | Min   | Max       | Obs |
|-----------|-----------|-------|-----------|-----|
| 14,285.29 | 19,024.17 | -1.00 | 50,000.00 | 7   |

**fc033\_max:** FC033 Max

| Mean      | SD        | Min   | Max        | Obs |
|-----------|-----------|-------|------------|-----|
| 27,777.44 | 33,829.95 | -1.00 | 100,000.00 | 9   |

**fc037\_min:** FC037 Min

| Mean  | SD    | Min   | Max   | Obs |
|-------|-------|-------|-------|-----|
| 12.25 | 12.92 | -1.00 | 30.00 | 4   |

**fc037\_max:** FC037 Max

| Mean  | SD    | Min   | Max   | Obs |
|-------|-------|-------|-------|-----|
| 15.80 | 13.72 | -1.00 | 30.00 | 5   |

**xworking:** Working

| Mean | SD   | Min  | Max  | Obs    |
|------|------|------|------|--------|
| 0.64 | 0.48 | 0.00 | 1.00 | 19,358 |

**xemployed:** Self-Employed

| Mean | SD   | Min  | Max  | Obs   |
|------|------|------|------|-------|
| 0.76 | 0.42 | 0.00 | 1.00 | 6,263 |

**xfgsample:** Selected to Answer Work Questions During the Pandemic

| Mean | SD   | Min  | Max  | Obs    |
|------|------|------|------|--------|
| 0.67 | 0.47 | 0.00 | 1.00 | 19,353 |

**xworkjuststarted:** Current Employed Job Started no More Than a Year or a Month

| Mean | SD   | Min  | Max  | Obs   |
|------|------|------|------|-------|
| 0.64 | 0.86 | 0.00 | 2.00 | 4,784 |

**xmainjobdays:** Days of Main Job

| Mean  | SD     | Min  | Max    | Obs    |
|-------|--------|------|--------|--------|
| 91.76 | 143.83 | 0.00 | 364.00 | 19,355 |

**xhhldfarmdays:** Days of Household Farming

| Mean  | SD     | Min  | Max    | Obs    |
|-------|--------|------|--------|--------|
| 66.79 | 109.19 | 0.00 | 336.00 | 19,355 |

**xsidejobdays:** Days of Side Job

| Mean | SD    | Min  | Max    | Obs    |
|------|-------|------|--------|--------|
| 6.42 | 43.07 | 0.00 | 364.00 | 19,355 |

**xgetjob:** Started to Work Since LastIW

| Mean | SD   | Min  | Max  | Obs    |
|------|------|------|------|--------|
| 0.08 | 0.27 | 0.00 | 1.00 | 19,358 |

**xquitjob:** Stopped Working Since LastIW

| Mean | SD   | Min  | Max  | Obs    |
|------|------|------|------|--------|
| 0.10 | 0.30 | 0.00 | 1.00 | 17,840 |

**proxy\_7:** Answered by a Proxy if Eligible

|       | Freq. | %      |
|-------|-------|--------|
| 1 Yes | 1,775 | 99.22  |
| 2 No  | 14    | 0.78   |
| Total | 1,789 | 100.00 |

**xrage: Age**

| Mean  | SD    | Min   | Max    | Obs    |
|-------|-------|-------|--------|--------|
| 61.56 | 10.07 | 18.00 | 108.00 | 19,361 |

**xiwmonth: Interview Month**

| Mean | SD   | Min  | Max   | Obs    |
|------|------|------|-------|--------|
| 7.52 | 0.51 | 6.00 | 11.00 | 19,361 |

**xiwyear: Interview Year**

| Mean     | SD   | Min      | Max      | Obs    |
|----------|------|----------|----------|--------|
| 2,020.00 | 0.04 | 2,017.00 | 2,020.00 | 19,361 |

**ziwtime: Preloaded: Time of LastIW**

| A String Variable |  |  |  |        |
|-------------------|--|--|--|--------|
| Obs:              |  |  |  | 19,232 |

**ziwyear: Preloaded: Year of LastIW**

| Mean     | SD   | Min      | Max      | Obs    |
|----------|------|----------|----------|--------|
| 2,017.72 | 0.99 | 2,011.00 | 2,018.00 | 19,232 |

**zworking: Preloaded: Working LastIW**

|                | Freq.  | %      |
|----------------|--------|--------|
| 0 No           | 6,446  | 34.17  |
| 1 Working      | 12,351 | 65.47  |
| 2 Never Worked | 68     | 0.36   |
| Total          | 18,865 | 100.00 |

**zrretired: Preloaded: Retirement LastIW**

| Mean | SD   | Min  | Max  | Obs    |
|------|------|------|------|--------|
| 0.14 | 0.35 | 0.00 | 1.00 | 18,888 |

**zfd011\_1: Preloaded: Starting Time for the Employer LastIW**

| Mean | SD | Min | Max | Obs |
|------|----|-----|-----|-----|
|------|----|-----|-----|-----|

2,010.64

10.36

1,963.00

2,018.00

4,747

---

**versionID:** Version ID

---

A String Variable

---

Obs:

19,361

---

## MODULE G1

### Household Income

householdID: Household ID

| A String Variable |        |
|-------------------|--------|
| Obs:              | 11,377 |

communityID: Community ID

| A String Variable |        |
|-------------------|--------|
| Obs:              | 11,377 |

gb001: Family Financial Respondent

|                             | Freq.  | %      |
|-----------------------------|--------|--------|
| 1 HHMemberName[1]           | 562    | 4.94   |
| 2 HHMemberName[2]           | 226    | 1.99   |
| 3 HHMemberName[3]           | 31     | 0.27   |
| 4 HHMemberName[4]           | 18     | 0.16   |
| 5 HHMemberName[5]           | 3      | 0.03   |
| 6 HHMemberName[6]           | 1      | 0.01   |
| 8 HHMemberName[8]           | 1      | 0.01   |
| 26 Main Respondent          | 6,685  | 58.81  |
| 27 Main Respondent's Spouse | 3,841  | 33.79  |
| Total                       | 11,368 | 100.00 |

gb002\_1\_: Wage and Bonus Income HHMemberName[1] Receive

|                       | Freq. | %      |
|-----------------------|-------|--------|
| 1 Yes                 | 2,338 | 48.12  |
| 2 No                  | 2,430 | 50.01  |
| 997 Do not Know       | 90    | 1.85   |
| 999 Refused to Answer | 1     | 0.02   |
| Total                 | 4,859 | 100.00 |

gb002\_2\_: Wage and Bonus Income HHMemberName[2] Receive

|                       | Freq. | %      |
|-----------------------|-------|--------|
| 1 Yes                 | 970   | 38.89  |
| 2 No                  | 1,473 | 59.06  |
| 997 Do not Know       | 50    | 2.00   |
| 999 Refused to Answer | 1     | 0.04   |
| Total                 | 2,494 | 100.00 |

**gb002\_3\_:** Wage and Bonus Income HHMemberName[3] Receive

|                 | Freq. | %      |
|-----------------|-------|--------|
| 1 Yes           | 215   | 26.38  |
| 2 No            | 588   | 72.15  |
| 997 Do not Know | 12    | 1.47   |
| Total           | 815   | 100.00 |

**gb002\_4\_:** Wage and Bonus Income HHMemberName[4] Receive

|                 | Freq. | %      |
|-----------------|-------|--------|
| 1 Yes           | 114   | 32.66  |
| 2 No            | 223   | 63.90  |
| 997 Do not Know | 12    | 3.44   |
| Total           | 349   | 100.00 |

**gb002\_5\_:** Wage and Bonus Income HHMemberName[5] Receive

|                 | Freq. | %      |
|-----------------|-------|--------|
| 1 Yes           | 33    | 34.74  |
| 2 No            | 61    | 64.21  |
| 997 Do not Know | 1     | 1.05   |
| Total           | 95    | 100.00 |

**gb002\_6\_:** Wage and Bonus Income HHMemberName[6] Receive

|                 | Freq. | %      |
|-----------------|-------|--------|
| 1 Yes           | 11    | 28.21  |
| 2 No            | 27    | 69.23  |
| 997 Do not Know | 1     | 2.56   |
| Total           | 39    | 100.00 |

**gb002\_7\_:** Wage and Bonus Income HHMemberName[7] Receive

|                 | Freq. | %      |
|-----------------|-------|--------|
| 1 Yes           | 5     | 26.32  |
| 2 No            | 13    | 68.42  |
| 997 Do not Know | 1     | 5.26   |
| Total           | 19    | 100.00 |

**gb002\_8\_:** Wage and Bonus Income HHMemberName[8] Receive



|       | Freq. | %      |
|-------|-------|--------|
| 1 Yes | 5     | 50.00  |
| 2 No  | 5     | 50.00  |
| Total | 10    | 100.00 |

**gb002\_9\_:** Wage and Bonus Income HHMemberName[9] Receive

|       | Freq. | %      |
|-------|-------|--------|
| 1 Yes | 1     | 50.00  |
| 2 No  | 1     | 50.00  |
| Total | 2     | 100.00 |

**gb002\_10\_:** Wage and Bonus Income HHMemberName[10] Receive

|       | Freq. | %      |
|-------|-------|--------|
| 1 Yes | 3     | 60.00  |
| 2 No  | 2     | 40.00  |
| Total | 5     | 100.00 |

**gb002\_11\_:** Wage and Bonus Income HHMemberName[11] Receive

|       | Freq. | %      |
|-------|-------|--------|
| 1 Yes | 1     | 50.00  |
| 2 No  | 1     | 50.00  |
| Total | 2     | 100.00 |

**gb002\_12\_:** Wage and Bonus Income HHMemberName[12] Receive

|       | Freq. | %      |
|-------|-------|--------|
| 2 No  | 1     | 100.00 |
| Total | 1     | 100.00 |

**gb002\_13\_:** Wage and Bonus Income HHMemberName[13] Receive

|       | Freq. | %      |
|-------|-------|--------|
| 2 No  | 1     | 100.00 |
| Total | 1     | 100.00 |

**gb002\_14\_:** Wage and Bonus Income HHMemberName[14] Receive

|       | Freq. | %      |
|-------|-------|--------|
| 2 No  | 1     | 100.00 |
| Total | 1     | 100.00 |

**gb003\_1\_:** Amount HHMemberName[1] Receive

| Mean | SD | Min | Max | Obs |
|------|----|-----|-----|-----|
|------|----|-----|-----|-----|

|           |           |       |              |       |
|-----------|-----------|-------|--------------|-------|
| 29,183.18 | 45,651.84 | -1.00 | 1,400,000.00 | 2,338 |
|-----------|-----------|-------|--------------|-------|

**gb003\_2\_:** Amount HHMemberName[2] Receive

| Mean      | SD        | Min   | Max        | Obs |
|-----------|-----------|-------|------------|-----|
| 26,761.64 | 35,135.18 | -1.00 | 400,000.00 | 970 |

**gb003\_3\_:** Amount HHMemberName[3] Receive

| Mean      | SD        | Min   | Max        | Obs |
|-----------|-----------|-------|------------|-----|
| 20,487.67 | 23,741.21 | -1.00 | 180,000.00 | 215 |

**gb003\_4\_:** Amount HHMemberName[4] Receive

| Mean      | SD        | Min   | Max        | Obs |
|-----------|-----------|-------|------------|-----|
| 27,791.90 | 35,562.11 | -1.00 | 200,000.00 | 114 |

**gb003\_5\_:** Amount HHMemberName[5] Receive

| Mean      | SD        | Min   | Max        | Obs |
|-----------|-----------|-------|------------|-----|
| 17,845.21 | 22,823.05 | -1.00 | 100,000.00 | 33  |

**gb003\_6\_:** Amount HHMemberName[6] Receive

| Mean      | SD        | Min   | Max        | Obs |
|-----------|-----------|-------|------------|-----|
| 46,908.91 | 67,955.20 | -1.00 | 240,000.00 | 11  |

**gb003\_7\_:** Amount HHMemberName[7] Receive

| Mean       | SD         | Min   | Max        | Obs |
|------------|------------|-------|------------|-----|
| 161,999.60 | 313,241.38 | -1.00 | 720,000.00 | 5   |

**gb003\_8\_:** Amount HHMemberName[8] Receive

| Mean      | SD        | Min      | Max       | Obs |
|-----------|-----------|----------|-----------|-----|
| 23,560.00 | 27,748.30 | 4,000.00 | 72,000.00 | 5   |

**gb003\_9\_:** Amount HHMemberName[9] Receive

| Mean      | SD | Min       | Max       | Obs |
|-----------|----|-----------|-----------|-----|
| 19,000.00 | .  | 19,000.00 | 19,000.00 | 1   |

**gb003\_10\_:** Amount HHMemberName[10] Receive

| Mean | SD | Min | Max | Obs |
|------|----|-----|-----|-----|
|------|----|-----|-----|-----|

|           |          |          |           |   |
|-----------|----------|----------|-----------|---|
| 15,666.67 | 6,658.33 | 8,000.00 | 20,000.00 | 3 |
|-----------|----------|----------|-----------|---|

**gb003\_11\_ : Amount HHMemberName[11] Receive**

| Mean  | SD | Min   | Max   | Obs |
|-------|----|-------|-------|-----|
| -1.00 | .  | -1.00 | -1.00 | 1   |

**gb003\_min\_1\_ : Min Bracket of gb003\_1\_**

| Mean      | SD        | Min   | Max        | Obs |
|-----------|-----------|-------|------------|-----|
| 19,782.79 | 22,959.49 | -1.00 | 100,000.00 | 461 |

**gb003\_max\_1\_ : Max Bracket of gb003\_1\_**

| Mean      | SD        | Min   | Max        | Obs |
|-----------|-----------|-------|------------|-----|
| 27,451.10 | 29,720.94 | -1.00 | 100,000.00 | 463 |

**gb003\_min\_2\_ : Min Bracket of gb003\_2\_**

| Mean      | SD        | Min   | Max        | Obs |
|-----------|-----------|-------|------------|-----|
| 16,725.26 | 22,308.95 | -1.00 | 100,000.00 | 226 |

**gb003\_max\_2\_ : Max Bracket of gb003\_2\_**

| Mean      | SD        | Min   | Max        | Obs |
|-----------|-----------|-------|------------|-----|
| 24,108.31 | 28,800.36 | -1.00 | 100,000.00 | 230 |

**gb003\_min\_3\_ : Min Bracket of gb003\_3\_**

| Mean      | SD        | Min   | Max        | Obs |
|-----------|-----------|-------|------------|-----|
| 14,183.27 | 19,668.03 | -1.00 | 100,000.00 | 49  |

**gb003\_max\_3\_ : Max Bracket of gb003\_3\_**

| Mean      | SD        | Min   | Max        | Obs |
|-----------|-----------|-------|------------|-----|
| 24,038.12 | 30,212.58 | -1.00 | 100,000.00 | 52  |

**gb003\_min\_4\_ : Min Bracket of gb003\_4\_**

| Mean      | SD        | Min   | Max       | Obs |
|-----------|-----------|-------|-----------|-----|
| 10,869.09 | 14,667.29 | -1.00 | 50,000.00 | 23  |

**gb003\_max\_4\_ : Max Bracket of gb003\_4\_**

| Mean | SD | Min | Max | Obs |
|------|----|-----|-----|-----|
|------|----|-----|-----|-----|

|           |           |       |            |    |
|-----------|-----------|-------|------------|----|
| 19,564.74 | 30,782.29 | -1.00 | 100,000.00 | 23 |
|-----------|-----------|-------|------------|----|

**gb003\_min\_5\_**: Min Bracket of gb003\_5\_

| Mean      | SD        | Min   | Max       | Obs |
|-----------|-----------|-------|-----------|-----|
| 12,857.00 | 12,198.93 | -1.00 | 30,000.00 | 7   |

**gb003\_max\_5\_**: Max Bracket of gb003\_5\_

| Mean      | SD        | Min   | Max       | Obs |
|-----------|-----------|-------|-----------|-----|
| 21,874.75 | 18,114.57 | -1.00 | 50,000.00 | 8   |

**gb003\_min\_6\_**: Min Bracket of gb003\_6\_

| Mean     | SD       | Min   | Max       | Obs |
|----------|----------|-------|-----------|-----|
| 4,999.50 | 7,071.77 | -1.00 | 10,000.00 | 2   |

**gb003\_max\_6\_**: Max Bracket of gb003\_6\_

| Mean      | SD        | Min   | Max       | Obs |
|-----------|-----------|-------|-----------|-----|
| 14,999.50 | 21,213.91 | -1.00 | 30,000.00 | 2   |

**gb003\_min\_7\_**: Min Bracket of gb003\_7\_

| Mean  | SD | Min   | Max   | Obs |
|-------|----|-------|-------|-----|
| -1.00 | .  | -1.00 | -1.00 | 1   |

**gb003\_max\_7\_**: Max Bracket of gb003\_7\_

| Mean     | SD       | Min   | Max      | Obs |
|----------|----------|-------|----------|-----|
| 2,499.50 | 3,536.24 | -1.00 | 5,000.00 | 2   |

**gb003\_min\_11\_**: Min Bracket of gb003\_11\_

| Mean      | SD | Min       | Max       | Obs |
|-----------|----|-----------|-----------|-----|
| 10,000.00 | .  | 10,000.00 | 10,000.00 | 1   |

**gb003\_max\_11\_**: Max Bracket of gb003\_11\_

| Mean      | SD | Min       | Max       | Obs |
|-----------|----|-----------|-----------|-----|
| 30,000.00 | .  | 30,000.00 | 30,000.00 | 1   |

**gb004\_1\_**: Exclude Insurance and Some Others for HHMemberName[1]

| Freq. | % |
|-------|---|
|-------|---|

|                       |       |        |
|-----------------------|-------|--------|
| 1 Yes                 | 801   | 34.26  |
| 2 No                  | 1,210 | 51.75  |
| 997 Do not Know       | 326   | 13.94  |
| 999 Refused to Answer | 1     | 0.04   |
| Total                 | 2,338 | 100.00 |

**gb004\_2\_:** Exclude Insurance and Some Others for HHMemberName[2]

|                 | Freq. | %      |
|-----------------|-------|--------|
| 1 Yes           | 331   | 34.12  |
| 2 No            | 490   | 50.52  |
| 997 Do not Know | 149   | 15.36  |
| Total           | 970   | 100.00 |

**gb004\_3\_:** Exclude Insurance and Some Others for HHMemberName[3]

|                 | Freq. | %      |
|-----------------|-------|--------|
| 1 Yes           | 56    | 26.05  |
| 2 No            | 114   | 53.02  |
| 997 Do not Know | 45    | 20.93  |
| Total           | 215   | 100.00 |

**gb004\_4\_:** Exclude Insurance and Some Others for HHMemberName[4]

|                 | Freq. | %      |
|-----------------|-------|--------|
| 1 Yes           | 29    | 25.44  |
| 2 No            | 60    | 52.63  |
| 997 Do not Know | 25    | 21.93  |
| Total           | 114   | 100.00 |

**gb004\_5\_:** Exclude Insurance and Some Others for HHMemberName[5]

|                 | Freq. | %      |
|-----------------|-------|--------|
| 1 Yes           | 8     | 24.24  |
| 2 No            | 15    | 45.45  |
| 997 Do not Know | 10    | 30.30  |
| Total           | 33    | 100.00 |

**gb004\_6\_:** Exclude Insurance and Some Others for HHMemberName[6]

|                 | Freq. | %      |
|-----------------|-------|--------|
| 1 Yes           | 8     | 72.73  |
| 2 No            | 2     | 18.18  |
| 997 Do not Know | 1     | 9.09   |
| Total           | 11    | 100.00 |

**gb004\_7\_:** Exclude Insurance and Some Others for HHMemberName[7]

|       | Freq. | %     |
|-------|-------|-------|
| 1 Yes | 1     | 20.00 |

|                 |   |        |
|-----------------|---|--------|
| 2 No            | 2 | 40.00  |
| 997 Do not Know | 2 | 40.00  |
| Total           | 5 | 100.00 |

**gb004\_8\_:** Exclude Insurance and Some Others for HHMemberName[8]

|                 | Freq. | %      |
|-----------------|-------|--------|
| 1 Yes           | 1     | 20.00  |
| 2 No            | 3     | 60.00  |
| 997 Do not Know | 1     | 20.00  |
| Total           | 5     | 100.00 |

**gb004\_9\_:** Exclude Insurance and Some Others for HHMemberName[9]

|                 | Freq. | %      |
|-----------------|-------|--------|
| 997 Do not Know | 1     | 100.00 |
| Total           | 1     | 100.00 |

**gb004\_10\_:** Exclude Insurance and Some Others for HHMemberName[10]

|                 | Freq. | %      |
|-----------------|-------|--------|
| 2 No            | 2     | 66.67  |
| 997 Do not Know | 1     | 33.33  |
| Total           | 3     | 100.00 |

**gb004\_11\_:** Exclude Insurance and Some Others for HHMemberName[11]

|       | Freq. | %      |
|-------|-------|--------|
| 1 Yes | 1     | 100.00 |
| Total | 1     | 100.00 |

**gb005\_1\_:** Total Excluded Amount for HHMemberName[1]

|                      | Freq. | %      |
|----------------------|-------|--------|
| 1 Yuan/Month         | 1,085 | 46.43  |
| 2 Yuan/Year          | 202   | 8.64   |
| 3 Percentage of Wage | 55    | 2.35   |
| 4 No                 | 995   | 42.58  |
| Total                | 2,337 | 100.00 |

**gb005\_2\_:** Total Excluded Amount for HHMemberName[2]

|                      | Freq. | %      |
|----------------------|-------|--------|
| 1 Yuan/Month         | 467   | 48.14  |
| 2 Yuan/Year          | 87    | 8.97   |
| 3 Percentage of Wage | 18    | 1.86   |
| 4 No                 | 398   | 41.03  |
| Total                | 970   | 100.00 |

**gb005\_3\_:** Total Excluded Amount for HHMemberName[3]

|                      | Freq. | %      |
|----------------------|-------|--------|
| 1 Yuan/Month         | 86    | 40.00  |
| 2 Yuan/Year          | 19    | 8.84   |
| 3 Percentage of Wage | 2     | 0.93   |
| 4 No                 | 108   | 50.23  |
| Total                | 215   | 100.00 |

**gb005\_4\_:** Total Excluded Amount for HHMemberName[4]

|                      | Freq. | %      |
|----------------------|-------|--------|
| 1 Yuan/Month         | 52    | 45.61  |
| 2 Yuan/Year          | 4     | 3.51   |
| 3 Percentage of Wage | 1     | 0.88   |
| 4 No                 | 57    | 50.00  |
| Total                | 114   | 100.00 |

**gb005\_5\_:** Total Excluded Amount for HHMemberName[5]

|                      | Freq. | %      |
|----------------------|-------|--------|
| 1 Yuan/Month         | 15    | 45.45  |
| 2 Yuan/Year          | 1     | 3.03   |
| 3 Percentage of Wage | 1     | 3.03   |
| 4 No                 | 16    | 48.48  |
| Total                | 33    | 100.00 |

**gb005\_6\_:** Total Excluded Amount for HHMemberName[6]

|              | Freq. | %      |
|--------------|-------|--------|
| 1 Yuan/Month | 7     | 63.64  |
| 2 Yuan/Year  | 2     | 18.18  |
| 4 No         | 2     | 18.18  |
| Total        | 11    | 100.00 |

**gb005\_7\_:** Total Excluded Amount for HHMemberName[7]

|              | Freq. | %      |
|--------------|-------|--------|
| 1 Yuan/Month | 2     | 40.00  |
| 2 Yuan/Year  | 1     | 20.00  |
| 4 No         | 2     | 40.00  |
| Total        | 5     | 100.00 |

**gb005\_8\_:** Total Excluded Amount for HHMemberName[8]

|              | Freq. | %      |
|--------------|-------|--------|
| 1 Yuan/Month | 2     | 40.00  |
| 4 No         | 3     | 60.00  |
| Total        | 5     | 100.00 |

**gb005\_9\_:** Total Excluded Amount for HHMemberName[9]

|              | Freq. | %      |
|--------------|-------|--------|
| 1 Yuan/Month | 1     | 100.00 |
| Total        | 1     | 100.00 |

**gb005\_10\_:** Total Excluded Amount for HHMemberName[10]

|              | Freq. | %      |
|--------------|-------|--------|
| 1 Yuan/Month | 1     | 33.33  |
| 4 No         | 2     | 66.67  |
| Total        | 3     | 100.00 |

**gb005\_11\_:** Total Excluded Amount for HHMemberName[11]

|              | Freq. | %      |
|--------------|-------|--------|
| 1 Yuan/Month | 1     | 100.00 |
| Total        | 1     | 100.00 |

**gb005\_1\_1\_:** Yuan/Month for HHMemberName[1]

| Mean   | SD     | Min   | Max       | Obs   |
|--------|--------|-------|-----------|-------|
| 315.86 | 844.47 | -1.00 | 10,000.00 | 1,085 |

**gb005\_1\_2\_:** Yuan/Month for HHMemberName[2]

| Mean   | SD     | Min   | Max      | Obs |
|--------|--------|-------|----------|-----|
| 246.52 | 591.33 | -1.00 | 6,000.00 | 467 |

**gb005\_1\_3\_:** Yuan/Month for HHMemberName[3]

| Mean   | SD     | Min   | Max      | Obs |
|--------|--------|-------|----------|-----|
| 203.58 | 456.19 | -1.00 | 3,000.00 | 86  |

**gb005\_1\_4\_:** Yuan/Month for HHMemberName[4]

| Mean   | SD     | Min   | Max      | Obs |
|--------|--------|-------|----------|-----|
| 226.33 | 435.19 | -1.00 | 2,000.00 | 52  |

**gb005\_1\_5\_:** Yuan/Month for HHMemberName[5]

| Mean   | SD     | Min   | Max      | Obs |
|--------|--------|-------|----------|-----|
| 159.20 | 346.39 | -1.00 | 1,000.00 | 15  |

**gb005\_1\_6\_:** Yuan/Month for HHMemberName[6]



| Mean   | SD     | Min   | Max      | Obs |
|--------|--------|-------|----------|-----|
| 427.86 | 787.25 | -1.00 | 2,000.00 | 7   |

gb005\_1\_7\_: Yuan/Month for HHMemberName[7]

| Mean   | SD     | Min   | Max    | Obs |
|--------|--------|-------|--------|-----|
| 199.50 | 283.55 | -1.00 | 400.00 | 2   |

gb005\_1\_8\_: Yuan/Month for HHMemberName[8]

| Mean   | SD     | Min   | Max    | Obs |
|--------|--------|-------|--------|-----|
| 279.50 | 396.69 | -1.00 | 560.00 | 2   |

gb005\_1\_9\_: Yuan/Month for HHMemberName[9]

| Mean  | SD | Min   | Max   | Obs |
|-------|----|-------|-------|-----|
| -1.00 | .  | -1.00 | -1.00 | 1   |

gb005\_1\_10\_: Yuan/Month for HHMemberName[10]

| Mean  | SD | Min   | Max   | Obs |
|-------|----|-------|-------|-----|
| -1.00 | .  | -1.00 | -1.00 | 1   |

gb005\_1\_11\_: Yuan/Month for HHMemberName[11]

| Mean  | SD | Min   | Max   | Obs |
|-------|----|-------|-------|-----|
| -1.00 | .  | -1.00 | -1.00 | 1   |

gb005\_1\_min\_1\_: Min Bracket of gb005\_1\_1\_

| Mean   | SD     | Min   | Max      | Obs |
|--------|--------|-------|----------|-----|
| 412.45 | 725.80 | -1.00 | 3,000.00 | 743 |

gb005\_1\_max\_1\_: Max Bracket of gb005\_1\_1\_

| Mean   | SD     | Min   | Max      | Obs |
|--------|--------|-------|----------|-----|
| 497.17 | 813.90 | -1.00 | 3,000.00 | 759 |

gb005\_1\_min\_2\_: Min Bracket of gb005\_1\_2\_

| Mean   | SD     | Min   | Max      | Obs |
|--------|--------|-------|----------|-----|
| 346.98 | 704.13 | -1.00 | 3,000.00 | 319 |

gb005\_1\_max\_2\_: Max Bracket of gb005\_1\_2\_

| Mean   | SD     | Min   | Max      | Obs |
|--------|--------|-------|----------|-----|
| 379.57 | 750.75 | -1.00 | 3,000.00 | 319 |

#### gb005\_1\_min\_3\_: Min Bracket of gb005\_1\_3\_

| Mean   | SD     | Min   | Max      | Obs |
|--------|--------|-------|----------|-----|
| 453.41 | 908.93 | -1.00 | 3,000.00 | 61  |

#### gb005\_1\_max\_3\_: Max Bracket of gb005\_1\_3\_

| Mean   | SD     | Min   | Max      | Obs |
|--------|--------|-------|----------|-----|
| 405.87 | 826.55 | -1.00 | 3,000.00 | 61  |

#### gb005\_1\_min\_4\_: Min Bracket of gb005\_1\_4\_

| Mean   | SD     | Min   | Max      | Obs |
|--------|--------|-------|----------|-----|
| 225.79 | 439.58 | -1.00 | 2,000.00 | 34  |

#### gb005\_1\_max\_4\_: Max Bracket of gb005\_1\_4\_

| Mean   | SD     | Min   | Max      | Obs |
|--------|--------|-------|----------|-----|
| 296.51 | 527.00 | -1.00 | 2,000.00 | 35  |

#### gb005\_1\_min\_5\_: Min Bracket of gb005\_1\_5\_

| Mean   | SD     | Min   | Max      | Obs |
|--------|--------|-------|----------|-----|
| 232.58 | 579.25 | -1.00 | 2,000.00 | 12  |

#### gb005\_1\_max\_5\_: Max Bracket of gb005\_1\_5\_

| Mean   | SD     | Min   | Max      | Obs |
|--------|--------|-------|----------|-----|
| 316.00 | 613.61 | -1.00 | 2,000.00 | 12  |

#### gb005\_1\_min\_6\_: Min Bracket of gb005\_1\_6\_

| Mean   | SD     | Min   | Max    | Obs |
|--------|--------|-------|--------|-----|
| 199.40 | 274.41 | -1.00 | 500.00 | 5   |

#### gb005\_1\_max\_6\_: Max Bracket of gb005\_1\_6\_

| Mean   | SD     | Min   | Max      | Obs |
|--------|--------|-------|----------|-----|
| 399.40 | 548.27 | -1.00 | 1,000.00 | 5   |

#### gb005\_1\_min\_7\_: Min Bracket of gb005\_1\_7\_

| Mean  | SD | Min   | Max   | Obs |
|-------|----|-------|-------|-----|
| -1.00 | .  | -1.00 | -1.00 | 1   |

gb005\_1\_max\_7\_: Max Bracket of gb005\_1\_7\_

| Mean  | SD | Min   | Max   | Obs |
|-------|----|-------|-------|-----|
| -1.00 | .  | -1.00 | -1.00 | 1   |

gb005\_1\_min\_8\_: Min Bracket of gb005\_1\_8\_

| Mean  | SD | Min   | Max   | Obs |
|-------|----|-------|-------|-----|
| -1.00 | .  | -1.00 | -1.00 | 1   |

gb005\_1\_max\_8\_: Max Bracket of gb005\_1\_8\_

| Mean  | SD | Min   | Max   | Obs |
|-------|----|-------|-------|-----|
| -1.00 | .  | -1.00 | -1.00 | 1   |

gb005\_1\_min\_9\_: Min Bracket of gb005\_1\_9\_

| Mean  | SD | Min   | Max   | Obs |
|-------|----|-------|-------|-----|
| -1.00 | .  | -1.00 | -1.00 | 1   |

gb005\_1\_max\_9\_: Max Bracket of gb005\_1\_9\_

| Mean  | SD | Min   | Max   | Obs |
|-------|----|-------|-------|-----|
| -1.00 | .  | -1.00 | -1.00 | 1   |

gb005\_1\_min\_10\_: Min Bracket of gb005\_1\_10\_

| Mean  | SD | Min   | Max   | Obs |
|-------|----|-------|-------|-----|
| -1.00 | .  | -1.00 | -1.00 | 1   |

gb005\_1\_max\_10\_: Max Bracket of gb005\_1\_10\_

| Mean  | SD | Min   | Max   | Obs |
|-------|----|-------|-------|-----|
| -1.00 | .  | -1.00 | -1.00 | 1   |

gb005\_1\_min\_11\_: Min Bracket of gb005\_1\_11\_

| Mean  | SD | Min   | Max   | Obs |
|-------|----|-------|-------|-----|
| -1.00 | .  | -1.00 | -1.00 | 1   |

gb005\_1\_max\_11\_: Max Bracket of gb005\_1\_11\_

| Mean  | SD | Min   | Max   | Obs |
|-------|----|-------|-------|-----|
| -1.00 | .  | -1.00 | -1.00 | 1   |

**gb005\_2\_1\_:** Yuan/Year for HHMemberName[1]

| Mean     | SD        | Min   | Max        | Obs |
|----------|-----------|-------|------------|-----|
| 8,460.55 | 16,827.59 | 24.00 | 140,000.00 | 202 |

**gb005\_2\_2\_:** Yuan/Year for HHMemberName[2]

| Mean     | SD       | Min   | Max       | Obs |
|----------|----------|-------|-----------|-----|
| 7,615.05 | 9,505.03 | 70.00 | 40,000.00 | 87  |

**gb005\_2\_3\_:** Yuan/Year for HHMemberName[3]

| Mean     | SD       | Min    | Max       | Obs |
|----------|----------|--------|-----------|-----|
| 1,986.84 | 2,799.37 | 100.00 | 10,000.00 | 19  |

**gb005\_2\_4\_:** Yuan/Year for HHMemberName[4]

| Mean     | SD       | Min    | Max      | Obs |
|----------|----------|--------|----------|-----|
| 3,077.50 | 2,798.69 | 450.00 | 7,000.00 | 4   |

**gb005\_2\_5\_:** Yuan/Year for HHMemberName[5]

| Mean     | SD | Min      | Max      | Obs |
|----------|----|----------|----------|-----|
| 4,000.00 | .  | 4,000.00 | 4,000.00 | 1   |

**gb005\_2\_6\_:** Yuan/Year for HHMemberName[6]

| Mean     | SD       | Min      | Max       | Obs |
|----------|----------|----------|-----------|-----|
| 7,500.00 | 3,535.53 | 5,000.00 | 10,000.00 | 2   |

**gb005\_2\_7\_:** Yuan/Year for HHMemberName[7]

| Mean   | SD | Min    | Max    | Obs |
|--------|----|--------|--------|-----|
| 430.00 | .  | 430.00 | 430.00 | 1   |

**gb005\_3\_1\_:** Percentage of Wage for HHMemberName[1]

| Mean  | SD    | Min  | Max    | Obs |
|-------|-------|------|--------|-----|
| 17.90 | 17.03 | 0.80 | 100.00 | 55  |

**gb005\_3\_2\_:** Percentage of Wage for HHMemberName[2]

| Mean  | SD    | Min  | Max   | Obs |
|-------|-------|------|-------|-----|
| 19.78 | 11.59 | 3.00 | 50.00 | 18  |

**gb005\_3\_3\_:** Percentage of Wage for HHMemberName[3]

| Mean  | SD    | Min   | Max   | Obs |
|-------|-------|-------|-------|-----|
| 35.00 | 21.21 | 20.00 | 50.00 | 2   |

**gb005\_3\_4\_:** Percentage of Wage for HHMemberName[4]

| Mean | SD | Min  | Max  | Obs |
|------|----|------|------|-----|
| 7.00 | .  | 7.00 | 7.00 | 1   |

**gb005\_3\_5\_:** Percentage of Wage for HHMemberName[5]

| Mean  | SD | Min   | Max   | Obs |
|-------|----|-------|-------|-----|
| 10.00 | .  | 10.00 | 10.00 | 1   |

**gb006\_1\_\_s1:** Pension HHMemberName[1] Receive

|       | Freq. | %      |
|-------|-------|--------|
| 0 No  | 4,479 | 92.18  |
| 1 Yes | 380   | 7.82   |
| Total | 4,859 | 100.00 |

**gb006\_2\_\_s1:** Pension HHMemberName[2] Receive

|       | Freq. | %      |
|-------|-------|--------|
| 0 No  | 2,314 | 92.78  |
| 1 Yes | 180   | 7.22   |
| Total | 2,494 | 100.00 |

**gb006\_3\_\_s1:** Pension HHMemberName[3] Receive

|       | Freq. | %      |
|-------|-------|--------|
| 0 No  | 759   | 93.13  |
| 1 Yes | 56    | 6.87   |
| Total | 815   | 100.00 |

**gb006\_4\_\_s1:** Pension HHMemberName[4] Receive

|       | Freq. | %      |
|-------|-------|--------|
| 0 No  | 332   | 95.13  |
| 1 Yes | 17    | 4.87   |
| Total | 349   | 100.00 |

## gb006\_5\_\_s1: Pension HHMemberName[5] Receive

|       | Freq. | %      |
|-------|-------|--------|
| 0 No  | 91    | 95.79  |
| 1 Yes | 4     | 4.21   |
| Total | 95    | 100.00 |

## gb006\_6\_\_s1: Pension HHMemberName[6] Receive

|       | Freq. | %      |
|-------|-------|--------|
| 0 No  | 37    | 94.87  |
| 1 Yes | 2     | 5.13   |
| Total | 39    | 100.00 |

## gb006\_7\_\_s1: Pension HHMemberName[7] Receive

|       | Freq.  | %      |
|-------|--------|--------|
| 0 No  | 11,376 | 99.99  |
| 1 Yes | 1      | 0.01   |
| Total | 11,377 | 100.00 |

## gb006\_8\_\_s1: Pension HHMemberName[8] Receive

|       | Freq.  | %      |
|-------|--------|--------|
| 0 No  | 11,377 | 100.00 |
| Total | 11,377 | 100.00 |

## gb006\_9\_\_s1: Pension HHMemberName[9] Receive

|       | Freq.  | %      |
|-------|--------|--------|
| 0 No  | 11,377 | 100.00 |
| Total | 11,377 | 100.00 |

## gb006\_10\_\_s1: Pension HHMemberName[10] Receive

|       | Freq.  | %      |
|-------|--------|--------|
| 0 No  | 11,377 | 100.00 |
| Total | 11,377 | 100.00 |

## gb006\_11\_\_s1: Pension HHMemberName[11] Receive

|       | Freq.  | %      |
|-------|--------|--------|
| 0 No  | 11,377 | 100.00 |
| Total | 11,377 | 100.00 |

## gb006\_12\_\_s1: Pension HHMemberName[12] Receive

|       | Freq.  | %      |
|-------|--------|--------|
| 0 No  | 11,377 | 100.00 |
| Total | 11,377 | 100.00 |

## gb006\_13\_\_s1: Pension HHMemberName[13] Receive

|       | Freq.  | %      |
|-------|--------|--------|
| 0 No  | 11,377 | 100.00 |
| Total | 11,377 | 100.00 |

## gb006\_14\_\_s1: Pension HHMemberName[14] Receive

|       | Freq.  | %      |
|-------|--------|--------|
| 0 No  | 11,377 | 100.00 |
| Total | 11,377 | 100.00 |

## gb006\_1\_\_s2: Unemployment Compensation HHMemberName[1] Receive

|       | Freq. | %      |
|-------|-------|--------|
| 0 No  | 4,821 | 99.22  |
| 2 Yes | 38    | 0.78   |
| Total | 4,859 | 100.00 |

## gb006\_2\_\_s2: Unemployment Compensation HHMemberName[2] Receive

|       | Freq. | %      |
|-------|-------|--------|
| 0 No  | 2,478 | 99.36  |
| 2 Yes | 16    | 0.64   |
| Total | 2,494 | 100.00 |

## gb006\_3\_\_s2: Unemployment Compensation HHMemberName[3] Receive

|       | Freq. | %      |
|-------|-------|--------|
| 0 No  | 811   | 99.51  |
| 2 Yes | 4     | 0.49   |
| Total | 815   | 100.00 |

## gb006\_4\_\_s2: Unemployment Compensation HHMemberName[4] Receive

|       | Freq. | %      |
|-------|-------|--------|
| 0 No  | 346   | 99.14  |
| 2 Yes | 3     | 0.86   |
| Total | 349   | 100.00 |

## gb006\_5\_\_s2: Unemployment Compensation HHMemberName[5] Receive

|  | Freq. | % |
|--|-------|---|
|--|-------|---|

|       |    |        |
|-------|----|--------|
| 0 No  | 95 | 100.00 |
| Total | 95 | 100.00 |

**gb006\_6\_\_s2: Unemployment Compensation HHMemberName[6] Receive**

|       | Freq. | %      |
|-------|-------|--------|
| 0 No  | 39    | 100.00 |
| Total | 39    | 100.00 |

**gb006\_7\_\_s2: Unemployment Compensation HHMemberName[7] Receive**

|       | Freq.  | %      |
|-------|--------|--------|
| 0 No  | 11,377 | 100.00 |
| Total | 11,377 | 100.00 |

**gb006\_8\_\_s2: Unemployment Compensation HHMemberName[8] Receive**

|       | Freq.  | %      |
|-------|--------|--------|
| 0 No  | 11,377 | 100.00 |
| Total | 11,377 | 100.00 |

**gb006\_9\_\_s2: Unemployment Compensation HHMemberName[9] Receive**

|       | Freq.  | %      |
|-------|--------|--------|
| 0 No  | 11,377 | 100.00 |
| Total | 11,377 | 100.00 |

**gb006\_10\_\_s2: Unemployment Compensation HHMemberName[10] Receive**

|       | Freq.  | %      |
|-------|--------|--------|
| 0 No  | 11,377 | 100.00 |
| Total | 11,377 | 100.00 |

**gb006\_11\_\_s2: Unemployment Compensation HHMemberName[11] Receive**

|       | Freq.  | %      |
|-------|--------|--------|
| 0 No  | 11,377 | 100.00 |
| Total | 11,377 | 100.00 |

**gb006\_12\_\_s2: Unemployment Compensation HHMemberName[12] Receive**

|       | Freq.  | %      |
|-------|--------|--------|
| 0 No  | 11,377 | 100.00 |
| Total | 11,377 | 100.00 |

**gb006\_13\_\_s2: Unemployment Compensation HHMemberName[13] Receive**



|       | Freq.  | %      |
|-------|--------|--------|
| 0 No  | 11,377 | 100.00 |
| Total | 11,377 | 100.00 |

gb006\_14\_\_s2: Unemployment Compensation HHMemberName[14] Receive

|       | Freq.  | %      |
|-------|--------|--------|
| 0 No  | 11,377 | 100.00 |
| Total | 11,377 | 100.00 |

gb006\_1\_\_s3: Pension Voucher HHMemberName[1] Receive

|       | Freq. | %      |
|-------|-------|--------|
| 0 No  | 4,835 | 99.51  |
| 3 Yes | 24    | 0.49   |
| Total | 4,859 | 100.00 |

gb006\_2\_\_s3: Pension Voucher HHMemberName[2] Receive

|       | Freq. | %      |
|-------|-------|--------|
| 0 No  | 2,479 | 99.40  |
| 3 Yes | 15    | 0.60   |
| Total | 2,494 | 100.00 |

gb006\_3\_\_s3: Pension Voucher HHMemberName[3] Receive

|       | Freq. | %      |
|-------|-------|--------|
| 0 No  | 813   | 99.75  |
| 3 Yes | 2     | 0.25   |
| Total | 815   | 100.00 |

gb006\_4\_\_s3: Pension Voucher HHMemberName[4] Receive

|       | Freq. | %      |
|-------|-------|--------|
| 0 No  | 346   | 99.14  |
| 3 Yes | 3     | 0.86   |
| Total | 349   | 100.00 |

gb006\_5\_\_s3: Pension Voucher HHMemberName[5] Receive

|       | Freq. | %      |
|-------|-------|--------|
| 0 No  | 95    | 100.00 |
| Total | 95    | 100.00 |

gb006\_6\_\_s3: Pension Voucher HHMemberName[6] Receive

|  | Freq. | % |
|--|-------|---|
|--|-------|---|

|       |    |        |
|-------|----|--------|
| 0 No  | 39 | 100.00 |
| Total | 39 | 100.00 |

**gb006\_7\_\_s3: Pension Voucher HHMemberName[7] Receive**

|       | Freq.  | %      |
|-------|--------|--------|
| 0 No  | 11,377 | 100.00 |
| Total | 11,377 | 100.00 |

**gb006\_8\_\_s3: Pension Voucher HHMemberName[8] Receive**

|       | Freq.  | %      |
|-------|--------|--------|
| 0 No  | 11,377 | 100.00 |
| Total | 11,377 | 100.00 |

**gb006\_9\_\_s3: Pension Voucher HHMemberName[9] Receive**

|       | Freq.  | %      |
|-------|--------|--------|
| 0 No  | 11,377 | 100.00 |
| Total | 11,377 | 100.00 |

**gb006\_10\_\_s3: Pension Voucher HHMemberName[10] Receive**

|       | Freq.  | %      |
|-------|--------|--------|
| 0 No  | 11,377 | 100.00 |
| Total | 11,377 | 100.00 |

**gb006\_11\_\_s3: Pension Voucher HHMemberName[11] Receive**

|       | Freq.  | %      |
|-------|--------|--------|
| 0 No  | 11,377 | 100.00 |
| Total | 11,377 | 100.00 |

**gb006\_12\_\_s3: Pension Voucher HHMemberName[12] Receive**

|       | Freq.  | %      |
|-------|--------|--------|
| 0 No  | 11,377 | 100.00 |
| Total | 11,377 | 100.00 |

**gb006\_13\_\_s3: Pension Voucher HHMemberName[13] Receive**

|       | Freq.  | %      |
|-------|--------|--------|
| 0 No  | 11,377 | 100.00 |
| Total | 11,377 | 100.00 |

**gb006\_14\_\_s3: Pension Voucher HHMemberName[14] Receive**

|       | Freq.  | %      |
|-------|--------|--------|
| 0 No  | 11,377 | 100.00 |
| Total | 11,377 | 100.00 |

gb006\_1\_\_s4: Pension Subsidy for the Oldest Old HHMemberName[1] Receive

|       | Freq. | %      |
|-------|-------|--------|
| 0 No  | 4,746 | 97.67  |
| 4 Yes | 113   | 2.33   |
| Total | 4,859 | 100.00 |

gb006\_2\_\_s4: Pension Subsidy for the Oldest Old HHMemberName[2] Receive

|       | Freq. | %      |
|-------|-------|--------|
| 0 No  | 2,440 | 97.83  |
| 4 Yes | 54    | 2.17   |
| Total | 2,494 | 100.00 |

gb006\_3\_\_s4: Pension Subsidy for the Oldest Old HHMemberName[3] Receive

|       | Freq. | %      |
|-------|-------|--------|
| 0 No  | 793   | 97.30  |
| 4 Yes | 22    | 2.70   |
| Total | 815   | 100.00 |

gb006\_4\_\_s4: Pension Subsidy for the Oldest Old HHMemberName[4] Receive

|       | Freq. | %      |
|-------|-------|--------|
| 0 No  | 337   | 96.56  |
| 4 Yes | 12    | 3.44   |
| Total | 349   | 100.00 |

gb006\_5\_\_s4: Pension Subsidy for the Oldest Old HHMemberName[5] Receive

|       | Freq. | %      |
|-------|-------|--------|
| 0 No  | 93    | 97.89  |
| 4 Yes | 2     | 2.11   |
| Total | 95    | 100.00 |

gb006\_6\_\_s4: Pension Subsidy for the Oldest Old HHMemberName[6] Receive

|       | Freq. | %      |
|-------|-------|--------|
| 0 No  | 38    | 97.44  |
| 4 Yes | 1     | 2.56   |
| Total | 39    | 100.00 |

gb006\_7\_\_s4: Pension Subsidy for the Oldest Old HHMemberName[7] Receive

|       | Freq.  | %      |
|-------|--------|--------|
| 0 No  | 11,377 | 100.00 |
| Total | 11,377 | 100.00 |

**gb006\_8\_\_s4:** Pension Subsidy for the Oldest Old HHMemberName[8] Receive

|       | Freq.  | %      |
|-------|--------|--------|
| 0 No  | 11,377 | 100.00 |
| Total | 11,377 | 100.00 |

**gb006\_9\_\_s4:** Pension Subsidy for the Oldest Old HHMemberName[9] Receive

|       | Freq.  | %      |
|-------|--------|--------|
| 0 No  | 11,377 | 100.00 |
| Total | 11,377 | 100.00 |

**gb006\_10\_\_s4:** Pension Subsidy for the Oldest Old HHMemberName[10] Receive

|       | Freq.  | %      |
|-------|--------|--------|
| 0 No  | 11,377 | 100.00 |
| Total | 11,377 | 100.00 |

**gb006\_11\_\_s4:** Pension Subsidy for the Oldest Old HHMemberName[11] Receive

|       | Freq.  | %      |
|-------|--------|--------|
| 0 No  | 11,377 | 100.00 |
| Total | 11,377 | 100.00 |

**gb006\_12\_\_s4:** Pension Subsidy for the Oldest Old HHMemberName[12] Receive

|       | Freq.  | %      |
|-------|--------|--------|
| 0 No  | 11,377 | 100.00 |
| Total | 11,377 | 100.00 |

**gb006\_13\_\_s4:** Pension Subsidy for the Oldest Old HHMemberName[13] Receive

|       | Freq.  | %      |
|-------|--------|--------|
| 0 No  | 11,377 | 100.00 |
| Total | 11,377 | 100.00 |

**gb006\_14\_\_s4:** Pension Subsidy for the Oldest Old HHMemberName[14] Receive

|       | Freq.  | %      |
|-------|--------|--------|
| 0 No  | 11,377 | 100.00 |
| Total | 11,377 | 100.00 |

**gb006\_1\_s5:** Workers' Industrial Accident Compensation HHMemberName[1] Receive

|       | Freq. | %      |
|-------|-------|--------|
| 0 No  | 4,807 | 98.93  |
| 5 Yes | 52    | 1.07   |
| Total | 4,859 | 100.00 |

**gb006\_2\_s5:** Workers' Industrial Accident Compensation HHMemberName[2] Receive

|       | Freq. | %      |
|-------|-------|--------|
| 0 No  | 2,477 | 99.32  |
| 5 Yes | 17    | 0.68   |
| Total | 2,494 | 100.00 |

**gb006\_3\_s5:** Workers' Industrial Accident Compensation HHMemberName[3] Receive

|       | Freq. | %      |
|-------|-------|--------|
| 0 No  | 808   | 99.14  |
| 5 Yes | 7     | 0.86   |
| Total | 815   | 100.00 |

**gb006\_4\_s5:** Workers' Industrial Accident Compensation HHMemberName[4] Receive

|       | Freq. | %      |
|-------|-------|--------|
| 0 No  | 345   | 98.85  |
| 5 Yes | 4     | 1.15   |
| Total | 349   | 100.00 |

**gb006\_5\_s5:** Workers' Industrial Accident Compensation HHMemberName[5] Receive

|       | Freq. | %      |
|-------|-------|--------|
| 0 No  | 95    | 100.00 |
| Total | 95    | 100.00 |

**gb006\_6\_s5:** Workers' Industrial Accident Compensation HHMemberName[6] Receive

|       | Freq. | %      |
|-------|-------|--------|
| 0 No  | 39    | 100.00 |
| Total | 39    | 100.00 |

**gb006\_7\_s5:** Workers' Industrial Accident Compensation HHMemberName[7] Receive

|  | Freq. | % |
|--|-------|---|
|--|-------|---|

|       |        |        |
|-------|--------|--------|
| 0 No  | 11,377 | 100.00 |
| Total | 11,377 | 100.00 |

**gb006\_8\_\_s5:** Workers' Industrial Accident Compensation HHMemberName[8] Receive

|       | Freq.  | %      |
|-------|--------|--------|
| 0 No  | 11,377 | 100.00 |
| Total | 11,377 | 100.00 |

**gb006\_9\_\_s5:** Workers' Industrial Accident Compensation HHMemberName[9] Receive

|       | Freq.  | %      |
|-------|--------|--------|
| 0 No  | 11,377 | 100.00 |
| Total | 11,377 | 100.00 |

**gb006\_10\_\_s5:** Workers' Industrial Accident Compensation HHMemberName[10] Receive

|       | Freq.  | %      |
|-------|--------|--------|
| 0 No  | 11,377 | 100.00 |
| Total | 11,377 | 100.00 |

**gb006\_11\_\_s5:** Workers' Industrial Accident Compensation HHMemberName[11] Receive

|       | Freq.  | %      |
|-------|--------|--------|
| 0 No  | 11,377 | 100.00 |
| Total | 11,377 | 100.00 |

**gb006\_12\_\_s5:** Workers' Industrial Accident Compensation HHMemberName[12] Receive

|       | Freq.  | %      |
|-------|--------|--------|
| 0 No  | 11,377 | 100.00 |
| Total | 11,377 | 100.00 |

**gb006\_13\_\_s5:** Workers' Industrial Accident Compensation HHMemberName[13] Receive

|       | Freq.  | %      |
|-------|--------|--------|
| 0 No  | 11,377 | 100.00 |
| Total | 11,377 | 100.00 |

**gb006\_14\_\_s5:** Workers' Industrial Accident Compensation HHMemberName[14] Receive

|  | Freq. | % |
|--|-------|---|
|--|-------|---|

|       |        |        |
|-------|--------|--------|
| 0 No  | 11,377 | 100.00 |
| Total | 11,377 | 100.00 |

**gb006\_1\_\_s6: Elderly Family Planning Subsidy HHMemberName[1] Receive**

|       | Freq. | %      |
|-------|-------|--------|
| 0 No  | 4,813 | 99.05  |
| 6 Yes | 46    | 0.95   |
| Total | 4,859 | 100.00 |

**gb006\_2\_\_s6: Elderly Family Planning Subsidy HHMemberName[2] Receive**

|       | Freq. | %      |
|-------|-------|--------|
| 0 No  | 2,472 | 99.12  |
| 6 Yes | 22    | 0.88   |
| Total | 2,494 | 100.00 |

**gb006\_3\_\_s6: Elderly Family Planning Subsidy HHMemberName[3] Receive**

|       | Freq. | %      |
|-------|-------|--------|
| 0 No  | 812   | 99.63  |
| 6 Yes | 3     | 0.37   |
| Total | 815   | 100.00 |

**gb006\_4\_\_s6: Elderly Family Planning Subsidy HHMemberName[4] Receive**

|       | Freq. | %      |
|-------|-------|--------|
| 0 No  | 343   | 98.28  |
| 6 Yes | 6     | 1.72   |
| Total | 349   | 100.00 |

**gb006\_5\_\_s6: Elderly Family Planning Subsidy HHMemberName[5] Receive**

|       | Freq. | %      |
|-------|-------|--------|
| 0 No  | 95    | 100.00 |
| Total | 95    | 100.00 |

**gb006\_6\_\_s6: Elderly Family Planning Subsidy HHMemberName[6] Receive**

|       | Freq. | %      |
|-------|-------|--------|
| 0 No  | 39    | 100.00 |
| Total | 39    | 100.00 |

**gb006\_7\_\_s6: Elderly Family Planning Subsidy HHMemberName[7] Receive**

|       | Freq.  | %      |
|-------|--------|--------|
| 0 No  | 11,377 | 100.00 |
| Total | 11,377 | 100.00 |

**gb006\_8\_\_s6: Elderly Family Planning Subsidy HHMemberName[8] Receive**

|       | Freq.  | %      |
|-------|--------|--------|
| 0 No  | 11,377 | 100.00 |
| Total | 11,377 | 100.00 |

**gb006\_9\_\_s6: Elderly Family Planning Subsidy HHMemberName[9] Receive**

|       | Freq.  | %      |
|-------|--------|--------|
| 0 No  | 11,377 | 100.00 |
| Total | 11,377 | 100.00 |

**gb006\_10\_\_s6: Elderly Family Planning Subsidy HHMemberName[10] Receive**

|       | Freq.  | %      |
|-------|--------|--------|
| 0 No  | 11,377 | 100.00 |
| Total | 11,377 | 100.00 |

**gb006\_11\_\_s6: Elderly Family Planning Subsidy HHMemberName[11] Receive**

|       | Freq.  | %      |
|-------|--------|--------|
| 0 No  | 11,377 | 100.00 |
| Total | 11,377 | 100.00 |

**gb006\_12\_\_s6: Elderly Family Planning Subsidy HHMemberName[12] Receive**

|       | Freq.  | %      |
|-------|--------|--------|
| 0 No  | 11,377 | 100.00 |
| Total | 11,377 | 100.00 |

**gb006\_13\_\_s6: Elderly Family Planning Subsidy HHMemberName[13] Receive**

|       | Freq.  | %      |
|-------|--------|--------|
| 0 No  | 11,377 | 100.00 |
| Total | 11,377 | 100.00 |

**gb006\_14\_\_s6: Elderly Family Planning Subsidy HHMemberName[14] Receive**

|       | Freq.  | %      |
|-------|--------|--------|
| 0 No  | 11,377 | 100.00 |
| Total | 11,377 | 100.00 |

**gb006\_1\_\_s7: Medical Aid HHMemberName[1] Receive**

|       | Freq. | %     |
|-------|-------|-------|
| 0 No  | 4,796 | 98.70 |
| 7 Yes | 63    | 1.30  |



|       |       |        |
|-------|-------|--------|
| Total | 4,859 | 100.00 |
|-------|-------|--------|

## gb006\_2\_\_s7: Medical Aid HHMemberName[2] Receive

|       | Freq. | %      |
|-------|-------|--------|
| 0 No  | 2,463 | 98.76  |
| 7 Yes | 31    | 1.24   |
| Total | 2,494 | 100.00 |

## gb006\_3\_\_s7: Medical Aid HHMemberName[3] Receive

|       | Freq. | %      |
|-------|-------|--------|
| 0 No  | 806   | 98.90  |
| 7 Yes | 9     | 1.10   |
| Total | 815   | 100.00 |

## gb006\_4\_\_s7: Medical Aid HHMemberName[4] Receive

|       | Freq. | %      |
|-------|-------|--------|
| 0 No  | 346   | 99.14  |
| 7 Yes | 3     | 0.86   |
| Total | 349   | 100.00 |

## gb006\_5\_\_s7: Medical Aid HHMemberName[5] Receive

|       | Freq. | %      |
|-------|-------|--------|
| 0 No  | 95    | 100.00 |
| Total | 95    | 100.00 |

## gb006\_6\_\_s7: Medical Aid HHMemberName[6] Receive

|       | Freq. | %      |
|-------|-------|--------|
| 0 No  | 38    | 97.44  |
| 7 Yes | 1     | 2.56   |
| Total | 39    | 100.00 |

## gb006\_7\_\_s7: Medical Aid HHMemberName[7] Receive

|       | Freq.  | %      |
|-------|--------|--------|
| 0 No  | 11,377 | 100.00 |
| Total | 11,377 | 100.00 |

## gb006\_8\_\_s7: Medical Aid HHMemberName[8] Receive

|       | Freq.  | %      |
|-------|--------|--------|
| 0 No  | 11,377 | 100.00 |
| Total | 11,377 | 100.00 |

**gb006\_9\_\_s7: Medical Aid HHMemberName[9] Receive**

|       | Freq.  | %      |
|-------|--------|--------|
| 0 No  | 11,377 | 100.00 |
| Total | 11,377 | 100.00 |

**gb006\_10\_\_s7: Medical Aid HHMemberName[10] Receive**

|       | Freq.  | %      |
|-------|--------|--------|
| 0 No  | 11,377 | 100.00 |
| Total | 11,377 | 100.00 |

**gb006\_11\_\_s7: Medical Aid HHMemberName[11] Receive**

|       | Freq.  | %      |
|-------|--------|--------|
| 0 No  | 11,377 | 100.00 |
| Total | 11,377 | 100.00 |

**gb006\_12\_\_s7: Medical Aid HHMemberName[12] Receive**

|       | Freq.  | %      |
|-------|--------|--------|
| 0 No  | 11,377 | 100.00 |
| Total | 11,377 | 100.00 |

**gb006\_13\_\_s7: Medical Aid HHMemberName[13] Receive**

|       | Freq.  | %      |
|-------|--------|--------|
| 0 No  | 11,377 | 100.00 |
| Total | 11,377 | 100.00 |

**gb006\_14\_\_s7: Medical Aid HHMemberName[14] Receive**

|       | Freq.  | %      |
|-------|--------|--------|
| 0 No  | 11,377 | 100.00 |
| Total | 11,377 | 100.00 |

**gb006\_1\_\_s8: Other Government Subsidy HHMemberName[1] Receive**

|       | Freq. | %      |
|-------|-------|--------|
| 0 No  | 4,673 | 96.17  |
| 8 Yes | 186   | 3.83   |
| Total | 4,859 | 100.00 |

**gb006\_2\_\_s8: Other Government Subsidy HHMemberName[2] Receive**

|      | Freq. | %     |
|------|-------|-------|
| 0 No | 2,422 | 97.11 |

|       |       |        |
|-------|-------|--------|
| 8 Yes | 72    | 2.89   |
| Total | 2,494 | 100.00 |

**gb006\_3\_\_s8: Other Government Subsidy HHMemberName[3] Receive**

|       | Freq. | %      |
|-------|-------|--------|
| 0 No  | 792   | 97.18  |
| 8 Yes | 23    | 2.82   |
| Total | 815   | 100.00 |

**gb006\_4\_\_s8: Other Government Subsidy HHMemberName[4] Receive**

|       | Freq. | %      |
|-------|-------|--------|
| 0 No  | 339   | 97.13  |
| 8 Yes | 10    | 2.87   |
| Total | 349   | 100.00 |

**gb006\_5\_\_s8: Other Government Subsidy HHMemberName[5] Receive**

|       | Freq. | %      |
|-------|-------|--------|
| 0 No  | 91    | 95.79  |
| 8 Yes | 4     | 4.21   |
| Total | 95    | 100.00 |

**gb006\_6\_\_s8: Other Government Subsidy HHMemberName[6] Receive**

|       | Freq. | %      |
|-------|-------|--------|
| 0 No  | 38    | 97.44  |
| 8 Yes | 1     | 2.56   |
| Total | 39    | 100.00 |

**gb006\_7\_\_s8: Other Government Subsidy HHMemberName[7] Receive**

|       | Freq.  | %      |
|-------|--------|--------|
| 0 No  | 11,377 | 100.00 |
| Total | 11,377 | 100.00 |

**gb006\_8\_\_s8: Other Government Subsidy HHMemberName[8] Receive**

|       | Freq.  | %      |
|-------|--------|--------|
| 0 No  | 11,376 | 99.99  |
| 8 Yes | 1      | 0.01   |
| Total | 11,377 | 100.00 |

**gb006\_9\_\_s8: Other Government Subsidy HHMemberName[9] Receive**

|      | Freq.  | %      |
|------|--------|--------|
| 0 No | 11,377 | 100.00 |

|       |        |        |
|-------|--------|--------|
| Total | 11,377 | 100.00 |
|-------|--------|--------|

**gb006\_10\_\_s8: Other Government Subsidy HHMemberName[10] Receive**

|       | Freq.  | %      |
|-------|--------|--------|
| 0 No  | 11,377 | 100.00 |
| Total | 11,377 | 100.00 |

**gb006\_11\_\_s8: Other Government Subsidy HHMemberName[11] Receive**

|       | Freq.  | %      |
|-------|--------|--------|
| 0 No  | 11,377 | 100.00 |
| Total | 11,377 | 100.00 |

**gb006\_12\_\_s8: Other Government Subsidy HHMemberName[12] Receive**

|       | Freq.  | %      |
|-------|--------|--------|
| 0 No  | 11,377 | 100.00 |
| Total | 11,377 | 100.00 |

**gb006\_13\_\_s8: Other Government Subsidy HHMemberName[13] Receive**

|       | Freq.  | %      |
|-------|--------|--------|
| 0 No  | 11,377 | 100.00 |
| Total | 11,377 | 100.00 |

**gb006\_14\_\_s8: Other Government Subsidy HHMemberName[14] Receive**

|       | Freq.  | %      |
|-------|--------|--------|
| 0 No  | 11,377 | 100.00 |
| Total | 11,377 | 100.00 |

**gb006\_1\_\_s9: Other Income Source HHMemberName[1] Receive**

|       | Freq. | %      |
|-------|-------|--------|
| 0 No  | 4,817 | 99.14  |
| 9 Yes | 42    | 0.86   |
| Total | 4,859 | 100.00 |

**gb006\_2\_\_s9: Other Income Source HHMemberName[2] Receive**

|       | Freq. | %      |
|-------|-------|--------|
| 0 No  | 2,473 | 99.16  |
| 9 Yes | 21    | 0.84   |
| Total | 2,494 | 100.00 |

**gb006\_3\_\_s9: Other Income Source HHMemberName[3] Receive**

|       | Freq. | %      |
|-------|-------|--------|
| 0 No  | 809   | 99.26  |
| 9 Yes | 6     | 0.74   |
| Total | 815   | 100.00 |

**gb006\_4\_\_s9: Other Income Source HHMemberName[4] Receive**

|       | Freq. | %      |
|-------|-------|--------|
| 0 No  | 347   | 99.43  |
| 9 Yes | 2     | 0.57   |
| Total | 349   | 100.00 |

**gb006\_5\_\_s9: Other Income Source HHMemberName[5] Receive**

|       | Freq. | %      |
|-------|-------|--------|
| 0 No  | 95    | 100.00 |
| Total | 95    | 100.00 |

**gb006\_6\_\_s9: Other Income Source HHMemberName[6] Receive**

|       | Freq. | %      |
|-------|-------|--------|
| 0 No  | 39    | 100.00 |
| Total | 39    | 100.00 |

**gb006\_7\_\_s9: Other Income Source HHMemberName[7] Receive**

|       | Freq.  | %      |
|-------|--------|--------|
| 0 No  | 11,377 | 100.00 |
| Total | 11,377 | 100.00 |

**gb006\_8\_\_s9: Other Income Source HHMemberName[8] Receive**

|       | Freq.  | %      |
|-------|--------|--------|
| 0 No  | 11,377 | 100.00 |
| Total | 11,377 | 100.00 |

**gb006\_9\_\_s9: Other Income Source HHMemberName[9] Receive**

|       | Freq.  | %      |
|-------|--------|--------|
| 0 No  | 11,377 | 100.00 |
| Total | 11,377 | 100.00 |

**gb006\_10\_\_s9: Other Income Source HHMemberName[10] Receive**

|       | Freq.  | %      |
|-------|--------|--------|
| 0 No  | 11,377 | 100.00 |
| Total | 11,377 | 100.00 |

**gb006\_11\_\_s9: Other Income Source HHMemberName[11] Receive**

|       | Freq.  | %      |
|-------|--------|--------|
| 0 No  | 11,377 | 100.00 |
| Total | 11,377 | 100.00 |

**gb006\_12\_\_s9: Other Income Source HHMemberName[12] Receive**

|       | Freq.  | %      |
|-------|--------|--------|
| 0 No  | 11,377 | 100.00 |
| Total | 11,377 | 100.00 |

**gb006\_13\_\_s9: Other Income Source HHMemberName[13] Receive**

|       | Freq.  | %      |
|-------|--------|--------|
| 0 No  | 11,377 | 100.00 |
| Total | 11,377 | 100.00 |

**gb006\_14\_\_s9: Other Income Source HHMemberName[14] Receive**

|       | Freq.  | %      |
|-------|--------|--------|
| 0 No  | 11,377 | 100.00 |
| Total | 11,377 | 100.00 |

**gb006\_1\_\_s10: None of the Above HHMemberName[1] Receive**

|        | Freq. | %      |
|--------|-------|--------|
| 0 No   | 706   | 14.53  |
| 10 Yes | 4,153 | 85.47  |
| Total  | 4,859 | 100.00 |

**gb006\_2\_\_s10: None of the Above HHMemberName[2] Receive**

|        | Freq. | %      |
|--------|-------|--------|
| 0 No   | 311   | 12.47  |
| 10 Yes | 2,183 | 87.53  |
| Total  | 2,494 | 100.00 |

**gb006\_3\_\_s10: None of the Above HHMemberName[3] Receive**

|        | Freq. | %      |
|--------|-------|--------|
| 0 No   | 98    | 12.02  |
| 10 Yes | 717   | 87.98  |
| Total  | 815   | 100.00 |

**gb006\_4\_\_s10: None of the Above HHMemberName[4] Receive**

|        | Freq. | %      |
|--------|-------|--------|
| 0 No   | 34    | 9.74   |
| 10 Yes | 315   | 90.26  |
| Total  | 349   | 100.00 |

gb006\_5\_\_s10: None of the Above HHMemberName[5] Receive

|        | Freq. | %      |
|--------|-------|--------|
| 0 No   | 9     | 9.47   |
| 10 Yes | 86    | 90.53  |
| Total  | 95    | 100.00 |

gb006\_6\_\_s10: None of the Above HHMemberName[6] Receive

|        | Freq. | %      |
|--------|-------|--------|
| 0 No   | 3     | 7.69   |
| 10 Yes | 36    | 92.31  |
| Total  | 39    | 100.00 |

gb006\_7\_\_s10: None of the Above HHMemberName[7] Receive

|        | Freq.  | %      |
|--------|--------|--------|
| 0 No   | 11,359 | 99.84  |
| 10 Yes | 18     | 0.16   |
| Total  | 11,377 | 100.00 |

gb006\_8\_\_s10: None of the Above HHMemberName[8] Receive

|        | Freq.  | %      |
|--------|--------|--------|
| 0 No   | 11,368 | 99.92  |
| 10 Yes | 9      | 0.08   |
| Total  | 11,377 | 100.00 |

gb006\_9\_\_s10: None of the Above HHMemberName[9] Receive

|        | Freq.  | %      |
|--------|--------|--------|
| 0 No   | 11,375 | 99.98  |
| 10 Yes | 2      | 0.02   |
| Total  | 11,377 | 100.00 |

gb006\_10\_\_s10: None of the Above HHMemberName[10] Receive

|        | Freq.  | %      |
|--------|--------|--------|
| 0 No   | 11,372 | 99.96  |
| 10 Yes | 5      | 0.04   |
| Total  | 11,377 | 100.00 |

gb006\_11\_\_s10: None of the Above HHMemberName[11] Receive

|        | Freq.  | %      |
|--------|--------|--------|
| 0 No   | 11,375 | 99.98  |
| 10 Yes | 2      | 0.02   |
| Total  | 11,377 | 100.00 |

**gb006\_12\_\_s10: None of the Above HHMemberName[12] Receive**

|        | Freq.  | %      |
|--------|--------|--------|
| 0 No   | 11,376 | 99.99  |
| 10 Yes | 1      | 0.01   |
| Total  | 11,377 | 100.00 |

**gb006\_13\_\_s10: None of the Above HHMemberName[13] Receive**

|        | Freq.  | %      |
|--------|--------|--------|
| 0 No   | 11,376 | 99.99  |
| 10 Yes | 1      | 0.01   |
| Total  | 11,377 | 100.00 |

**gb006\_14\_\_s10: None of the Above HHMemberName[14] Receive**

|        | Freq.  | %      |
|--------|--------|--------|
| 0 No   | 11,376 | 99.99  |
| 10 Yes | 1      | 0.01   |
| Total  | 11,377 | 100.00 |

**gb006\_1\_1\_: Pension Amount HHMemberName[1] Receive**

| Mean      | SD        | Min   | Max        | Obs |
|-----------|-----------|-------|------------|-----|
| 10,371.98 | 17,305.09 | -1.00 | 150,000.00 | 380 |

**gb006\_1\_2\_: Pension Amount HHMemberName[2] Receive**

| Mean      | SD        | Min   | Max        | Obs |
|-----------|-----------|-------|------------|-----|
| 11,314.42 | 17,217.04 | -1.00 | 108,000.00 | 180 |

**gb006\_1\_3\_: Pension Amount HHMemberName[3] Receive**

| Mean     | SD        | Min   | Max       | Obs |
|----------|-----------|-------|-----------|-----|
| 8,755.68 | 17,955.51 | -1.00 | 96,000.00 | 56  |

**gb006\_1\_4\_: Pension Amount HHMemberName[4] Receive**

| Mean     | SD       | Min   | Max       | Obs |
|----------|----------|-------|-----------|-----|
| 4,126.41 | 6,610.52 | -1.00 | 24,000.00 | 17  |



**gb006\_1\_5\_:** Pension Amount HHMemberName[5] Receive

| Mean     | SD     | Min    | Max      | Obs |
|----------|--------|--------|----------|-----|
| 1,422.50 | 969.76 | 170.00 | 2,400.00 | 4   |

**gb006\_1\_6\_:** Pension Amount HHMemberName[6] Receive

| Mean     | SD       | Min   | Max      | Obs |
|----------|----------|-------|----------|-----|
| 1,799.50 | 2,546.29 | -1.00 | 3,600.00 | 2   |

**gb006\_1\_7\_:** Pension Amount HHMemberName[7] Receive

| Mean      | SD | Min       | Max       | Obs |
|-----------|----|-----------|-----------|-----|
| 26,400.00 | .  | 26,400.00 | 26,400.00 | 1   |

**gb006\_2\_1\_:** Unemployment Compensation Amount HHMemberName[1] Receive

| Mean     | SD       | Min   | Max       | Obs |
|----------|----------|-------|-----------|-----|
| 3,089.05 | 5,210.74 | -1.00 | 20,000.00 | 38  |

**gb006\_2\_2\_:** Unemployment Compensation Amount HHMemberName[2] Receive

| Mean     | SD       | Min   | Max       | Obs |
|----------|----------|-------|-----------|-----|
| 3,359.31 | 8,079.45 | -1.00 | 30,000.00 | 16  |

**gb006\_2\_3\_:** Unemployment Compensation Amount HHMemberName[3] Receive

| Mean  | SD   | Min   | Max   | Obs |
|-------|------|-------|-------|-----|
| -1.00 | 0.00 | -1.00 | -1.00 | 4   |

**gb006\_2\_4\_:** Unemployment Compensation Amount HHMemberName[4] Receive

| Mean  | SD   | Min   | Max   | Obs |
|-------|------|-------|-------|-----|
| -1.00 | 0.00 | -1.00 | -1.00 | 3   |

**gb006\_3\_1\_:** Pension Voucher Amount HHMemberName[1] Receive

| Mean     | SD        | Min   | Max       | Obs |
|----------|-----------|-------|-----------|-----|
| 3,693.52 | 10,622.49 | -1.00 | 46,000.00 | 25  |

**gb006\_3\_2\_:** Pension Voucher Amount HHMemberName[2] Receive

| Mean   | SD       | Min   | Max      | Obs |
|--------|----------|-------|----------|-----|
| 882.13 | 1,299.02 | -1.00 | 3,600.00 | 15  |

**gb006\_3\_3\_:** Pension Voucher Amount HHMemberName[3] Receive

| Mean   | SD     | Min   | Max      | Obs |
|--------|--------|-------|----------|-----|
| 599.50 | 849.24 | -1.00 | 1,200.00 | 2   |

**gb006\_3\_4\_:** Pension Voucher Amount HHMemberName[4] Receive

| Mean   | SD     | Min   | Max      | Obs |
|--------|--------|-------|----------|-----|
| 399.33 | 693.40 | -1.00 | 1,200.00 | 3   |

**gb006\_4\_1\_:** Pension Subsidy for the Oldest Old Amount HHMemberName[1] Receive

| Mean   | SD     | Min   | Max      | Obs |
|--------|--------|-------|----------|-----|
| 751.44 | 809.09 | -1.00 | 4,800.00 | 113 |

**gb006\_4\_2\_:** Pension Subsidy for the Oldest Old Amount HHMemberName[2] Receive

| Mean   | SD     | Min   | Max      | Obs |
|--------|--------|-------|----------|-----|
| 748.41 | 756.36 | -1.00 | 3,600.00 | 54  |

**gb006\_4\_3\_:** Pension Subsidy for the Oldest Old Amount HHMemberName[3] Receive

| Mean   | SD     | Min   | Max      | Obs |
|--------|--------|-------|----------|-----|
| 826.86 | 598.69 | -1.00 | 2,400.00 | 22  |

**gb006\_4\_4\_:** Pension Subsidy for the Oldest Old Amount HHMemberName[4] Receive

| Mean   | SD     | Min   | Max      | Obs |
|--------|--------|-------|----------|-----|
| 643.17 | 452.23 | -1.00 | 1,260.00 | 12  |

**gb006\_4\_5\_:** Pension Subsidy for the Oldest Old Amount HHMemberName[5] Receive

| Mean   | SD     | Min   | Max      | Obs |
|--------|--------|-------|----------|-----|
| 599.50 | 849.24 | -1.00 | 1,200.00 | 2   |

**gb006\_4\_6\_:** Pension Subsidy for the Oldest Old Amount HHMemberName[6] Receive

| Mean  | SD | Min   | Max   | Obs |
|-------|----|-------|-------|-----|
| -1.00 | .  | -1.00 | -1.00 | 1   |

**gb006\_5\_1\_:** Workers' Industrial Accident Compensation Amount HHMemberName[1] Receive

| Mean     | SD        | Min   | Max        | Obs |
|----------|-----------|-------|------------|-----|
| 3,571.52 | 16,106.77 | -1.00 | 113,422.00 | 52  |

**gb006\_5\_2\_:** Workers' Industrial Accident Compensation Amount HHMemberName[2] Receive

| Mean     | SD       | Min   | Max       | Obs |
|----------|----------|-------|-----------|-----|
| 2,887.59 | 6,087.19 | -1.00 | 20,000.00 | 17  |

**gb006\_5\_3\_:** Workers' Industrial Accident Compensation Amount HHMemberName[3] Receive

| Mean   | SD     | Min   | Max      | Obs |
|--------|--------|-------|----------|-----|
| 387.86 | 759.98 | -1.00 | 2,000.00 | 7   |

**gb006\_5\_4\_:** Workers' Industrial Accident Compensation Amount HHMemberName[4] Receive

| Mean     | SD       | Min   | Max      | Obs |
|----------|----------|-------|----------|-----|
| 1,899.25 | 3,800.50 | -1.00 | 7,600.00 | 4   |

**gb006\_6\_1\_:** Elderly Family Planning Subsidy Amount HHMemberName[1] Receive

| Mean     | SD       | Min   | Max       | Obs |
|----------|----------|-------|-----------|-----|
| 1,018.35 | 2,759.73 | -1.00 | 15,000.00 | 46  |

**gb006\_6\_2\_:** Elderly Family Planning Subsidy Amount HHMemberName[2] Receive

| Mean     | SD       | Min   | Max       | Obs |
|----------|----------|-------|-----------|-----|
| 1,162.00 | 3,140.36 | -1.00 | 15,000.00 | 22  |

**gb006\_6\_3\_:** Elderly Family Planning Subsidy Amount HHMemberName[3] Receive

| Mean   | SD     | Min   | Max    | Obs |
|--------|--------|-------|--------|-----|
| 626.33 | 543.65 | -1.00 | 960.00 | 3   |

**gb006\_6\_4\_:** Elderly Family Planning Subsidy Amount HHMemberName[4] Receive

| Mean   | SD     | Min   | Max      | Obs |
|--------|--------|-------|----------|-----|
| 693.00 | 544.08 | -1.00 | 1,200.00 | 6   |

**gb006\_7\_1\_:** Medical Aid Amount HHMemberName[1] Receive

| Mean     | SD        | Min   | Max        | Obs |
|----------|-----------|-------|------------|-----|
| 3,991.71 | 17,775.25 | -1.00 | 140,000.00 | 63  |

**gb006\_7\_2\_:** Medical Aid Amount HHMemberName[2] Receive

| Mean     | SD       | Min   | Max       | Obs |
|----------|----------|-------|-----------|-----|
| 1,555.61 | 3,127.61 | -1.00 | 14,000.00 | 31  |

**gb006\_7\_3\_:** Medical Aid Amount HHMemberName[3] Receive

| Mean     | SD       | Min   | Max       | Obs |
|----------|----------|-------|-----------|-----|
| 1,755.00 | 3,261.51 | -1.00 | 10,000.00 | 9   |

**gb006\_7\_4\_:** Medical Aid Amount HHMemberName[4] Receive

| Mean | SD    | Min   | Max   | Obs |
|------|-------|-------|-------|-----|
| 9.33 | 17.90 | -1.00 | 30.00 | 3   |

**gb006\_7\_6\_:** Medical Aid Amount HHMemberName[6] Receive

| Mean  | SD | Min   | Max   | Obs |
|-------|----|-------|-------|-----|
| -1.00 | .  | -1.00 | -1.00 | 1   |

**gb006\_8\_1\_:** Other Government Subsidy Amount HHMemberName[1] Receive

| Mean     | SD       | Min   | Max       | Obs |
|----------|----------|-------|-----------|-----|
| 2,429.58 | 4,259.09 | -1.00 | 25,000.00 | 186 |

**gb006\_8\_2\_:** Other Government Subsidy Amount HHMemberName[2] Receive

| Mean     | SD       | Min   | Max       | Obs |
|----------|----------|-------|-----------|-----|
| 1,962.69 | 3,851.58 | -1.00 | 25,800.00 | 72  |

**gb006\_8\_3\_:** Other Government Subsidy Amount HHMemberName[3] Receive

| Mean   | SD       | Min   | Max      | Obs |
|--------|----------|-------|----------|-----|
| 717.17 | 1,211.15 | -1.00 | 5,076.00 | 23  |

**gb006\_8\_4\_:** Other Government Subsidy Amount HHMemberName[4] Receive

| Mean   | SD       | Min   | Max      | Obs |
|--------|----------|-------|----------|-----|
| 865.60 | 1,846.38 | -1.00 | 6,000.00 | 10  |

**gb006\_8\_5\_:** Other Government Subsidy Amount HHMemberName[5] Receive

| Mean   | SD     | Min    | Max      | Obs |
|--------|--------|--------|----------|-----|
| 770.00 | 714.33 | 200.00 | 1,680.00 | 4   |

**gb006\_8\_6\_:** Other Government Subsidy Amount HHMemberName[6] Receive

| Mean     | SD | Min      | Max      | Obs |
|----------|----|----------|----------|-----|
| 2,400.00 | .  | 2,400.00 | 2,400.00 | 1   |

**gb006\_8\_8\_:** Other Government Subsidy Amount HHMemberName[8] Receive

| Mean     | SD | Min      | Max      | Obs |
|----------|----|----------|----------|-----|
| 2,600.00 | .  | 2,600.00 | 2,600.00 | 1   |

**gb006\_9\_1\_:** Other Income Source Amount HHMemberName[1] Receive

| Mean     | SD        | Min   | Max        | Obs |
|----------|-----------|-------|------------|-----|
| 7,586.48 | 23,176.74 | -1.00 | 139,416.00 | 42  |

**gb006\_9\_2\_:** Other Income Source Amount HHMemberName[2] Receive

| Mean     | SD       | Min   | Max       | Obs |
|----------|----------|-------|-----------|-----|
| 1,397.29 | 2,402.83 | -1.00 | 10,000.00 | 21  |

**gb006\_9\_3\_:** Other Income Source Amount HHMemberName[3] Receive

| Mean   | SD     | Min   | Max      | Obs |
|--------|--------|-------|----------|-----|
| 499.33 | 837.14 | -1.00 | 2,000.00 | 6   |

**gb006\_9\_4\_:** Other Income Source Amount HHMemberName[4] Receive

| Mean  | SD   | Min   | Max   | Obs |
|-------|------|-------|-------|-----|
| -1.00 | 0.00 | -1.00 | -1.00 | 2   |

**gb007\_1\_:** Impact of COVID on Wage for HHMemberName[1]

|            | Freq. | %      |
|------------|-------|--------|
| 1 Decrease | 2,163 | 44.52  |
| 2 Increase | 53    | 1.09   |
| 3 Unchange | 2,643 | 54.39  |
| Total      | 4,859 | 100.00 |

**gb007\_2\_:** Impact of COVID on Wage for HHMemberName[2]

|            | Freq. | %      |
|------------|-------|--------|
| 1 Decrease | 915   | 36.69  |
| 2 Increase | 12    | 0.48   |
| 3 Unchange | 1,567 | 62.83  |
| Total      | 2,494 | 100.00 |

**gb007\_3\_:** Impact of COVID on Wage for HHMemberName[3]

|            | Freq. | %      |
|------------|-------|--------|
| 1 Decrease | 215   | 26.38  |
| 2 Increase | 1     | 0.12   |
| 3 Unchange | 599   | 73.50  |
| Total      | 815   | 100.00 |

**gb007\_4\_:** Impact of COVID on Wage for HHMemberName[4]

|            | Freq. | %      |
|------------|-------|--------|
| 1 Decrease | 114   | 32.66  |
| 3 Unchange | 235   | 67.34  |
| Total      | 349   | 100.00 |

**gb007\_5\_:** Impact of COVID on Wage for HHMemberName[5]

|            | Freq. | %      |
|------------|-------|--------|
| 1 Decrease | 36    | 37.89  |
| 3 Unchange | 59    | 62.11  |
| Total      | 95    | 100.00 |

**gb007\_6\_:** Impact of COVID on Wage for HHMemberName[6]

|            | Freq. | %      |
|------------|-------|--------|
| 1 Decrease | 9     | 23.08  |
| 2 Increase | 1     | 2.56   |
| 3 Unchange | 29    | 74.36  |
| Total      | 39    | 100.00 |

**gb007\_7\_:** Impact of COVID on Wage for HHMemberName[7]

|            | Freq. | %      |
|------------|-------|--------|
| 1 Decrease | 4     | 21.05  |
| 3 Unchange | 15    | 78.95  |
| Total      | 19    | 100.00 |

**gb007\_8\_:** Impact of COVID on Wage for HHMemberName[8]

|            | Freq. | %     |
|------------|-------|-------|
| 1 Decrease | 2     | 20.00 |

|            |    |        |
|------------|----|--------|
| 3 Unchange | 8  | 80.00  |
| Total      | 10 | 100.00 |

**gb007\_9\_**: Impact of COVID on Wage for HHMemberName[9]

|            | Freq. | %      |
|------------|-------|--------|
| 1 Decrease | 1     | 50.00  |
| 3 Unchange | 1     | 50.00  |
| Total      | 2     | 100.00 |

**gb007\_10\_**: Impact of COVID on Wage for HHMemberName[10]

|            | Freq. | %      |
|------------|-------|--------|
| 1 Decrease | 3     | 60.00  |
| 3 Unchange | 2     | 40.00  |
| Total      | 5     | 100.00 |

**gb007\_11\_**: Impact of COVID on Wage for HHMemberName[11]

|            | Freq. | %      |
|------------|-------|--------|
| 1 Decrease | 1     | 50.00  |
| 3 Unchange | 1     | 50.00  |
| Total      | 2     | 100.00 |

**gb007\_12\_**: Impact of COVID on Wage for HHMemberName[12]

|            | Freq. | %      |
|------------|-------|--------|
| 3 Unchange | 1     | 100.00 |
| Total      | 1     | 100.00 |

**gb007\_13\_**: Impact of COVID on Wage for HHMemberName[13]

|            | Freq. | %      |
|------------|-------|--------|
| 3 Unchange | 1     | 100.00 |
| Total      | 1     | 100.00 |

**gb007\_14\_**: Impact of COVID on Wage for HHMemberName[14]

|            | Freq. | %      |
|------------|-------|--------|
| 3 Unchange | 1     | 100.00 |
| Total      | 1     | 100.00 |

**gb007\_1\_1\_**: Amount Decreased HHMemberName[1] Receive

| Mean      | SD        | Min   | Max          | Obs   |
|-----------|-----------|-------|--------------|-------|
| 11,780.59 | 34,885.39 | -1.00 | 1,000,000.00 | 2,163 |

**gb007\_1\_2\_**: Amount Decreased HHMemberName[2] Receive

| Mean     | SD        | Min   | Max        | Obs |
|----------|-----------|-------|------------|-----|
| 9,358.77 | 25,827.39 | -1.00 | 700,000.00 | 915 |

**gb007\_1\_3\_:** Amount Decreased HHMemberName[3] Receive

| Mean     | SD        | Min   | Max       | Obs |
|----------|-----------|-------|-----------|-----|
| 8,477.06 | 12,132.43 | -1.00 | 90,000.00 | 215 |

**gb007\_1\_4\_:** Amount Decreased HHMemberName[4] Receive

| Mean     | SD        | Min   | Max       | Obs |
|----------|-----------|-------|-----------|-----|
| 8,257.66 | 10,730.37 | -1.00 | 70,000.00 | 114 |

**gb007\_1\_5\_:** Amount Decreased HHMemberName[5] Receive

| Mean     | SD        | Min   | Max       | Obs |
|----------|-----------|-------|-----------|-----|
| 9,833.11 | 10,546.03 | -1.00 | 50,000.00 | 36  |

**gb007\_1\_6\_:** Amount Decreased HHMemberName[6] Receive

| Mean     | SD       | Min   | Max       | Obs |
|----------|----------|-------|-----------|-----|
| 8,899.67 | 9,052.44 | -1.00 | 20,000.00 | 9   |

**gb007\_1\_7\_:** Amount Decreased HHMemberName[7] Receive

| Mean      | SD        | Min   | Max       | Obs |
|-----------|-----------|-------|-----------|-----|
| 11,249.75 | 10,308.13 | -1.00 | 20,000.00 | 4   |

**gb007\_1\_8\_:** Amount Decreased HHMemberName[8] Receive

| Mean      | SD       | Min       | Max       | Obs |
|-----------|----------|-----------|-----------|-----|
| 19,000.00 | 1,414.21 | 18,000.00 | 20,000.00 | 2   |

**gb007\_1\_9\_:** Amount Decreased HHMemberName[9] Receive

| Mean     | SD | Min      | Max      | Obs |
|----------|----|----------|----------|-----|
| 2,600.00 | .  | 2,600.00 | 2,600.00 | 1   |

**gb007\_1\_10\_:** Amount Decreased HHMemberName[10] Receive

| Mean     | SD       | Min      | Max       | Obs |
|----------|----------|----------|-----------|-----|
| 5,533.33 | 3,931.07 | 2,600.00 | 10,000.00 | 3   |

**gb007\_1\_11\_:** Amount Decreased HHMemberName[11] Receive



| Mean     | SD | Min      | Max      | Obs |
|----------|----|----------|----------|-----|
| 3,000.00 | .  | 3,000.00 | 3,000.00 | 1   |

**gb007\_1\_min\_1\_:** Min Bracket of gb007\_1\_1\_

| Mean     | SD       | Min   | Max       | Obs |
|----------|----------|-------|-----------|-----|
| 3,905.12 | 5,925.55 | -1.00 | 20,000.00 | 445 |

**gb007\_1\_min\_2\_:** Min Bracket of gb007\_1\_2\_

| Mean     | SD       | Min   | Max       | Obs |
|----------|----------|-------|-----------|-----|
| 2,626.40 | 5,294.52 | -1.00 | 20,000.00 | 185 |

**gb007\_1\_min\_3\_:** Min Bracket of gb007\_1\_3\_

| Mean     | SD       | Min   | Max       | Obs |
|----------|----------|-------|-----------|-----|
| 3,273.55 | 6,218.17 | -1.00 | 20,000.00 | 62  |

**gb007\_1\_min\_4\_:** Min Bracket of gb007\_1\_4\_

| Mean     | SD       | Min   | Max       | Obs |
|----------|----------|-------|-----------|-----|
| 1,777.04 | 4,568.87 | -1.00 | 20,000.00 | 27  |

**gb007\_1\_min\_5\_:** Min Bracket of gb007\_1\_5\_

| Mean     | SD       | Min   | Max      | Obs |
|----------|----------|-------|----------|-----|
| 1,499.50 | 1,927.69 | -1.00 | 5,000.00 | 8   |

**gb007\_1\_min\_6\_:** Min Bracket of gb007\_1\_6\_

| Mean   | SD       | Min   | Max      | Obs |
|--------|----------|-------|----------|-----|
| 999.33 | 1,732.63 | -1.00 | 3,000.00 | 3   |

**gb007\_1\_min\_7\_:** Min Bracket of gb007\_1\_7\_

| Mean  | SD | Min   | Max   | Obs |
|-------|----|-------|-------|-----|
| -1.00 | .  | -1.00 | -1.00 | 1   |

**gb007\_1\_min\_8\_:** Min Bracket of gb007\_1\_8\_

| Mean  | SD | Min   | Max   | Obs |
|-------|----|-------|-------|-----|
| -1.00 | .  | -1.00 | -1.00 | 1   |

**gb007\_1\_max\_1\_:** Max Bracket of gb007\_1\_1\_

| Mean     | SD       | Min   | Max       | Obs |
|----------|----------|-------|-----------|-----|
| 3,802.23 | 6,034.02 | -1.00 | 20,000.00 | 431 |

**gb007\_1\_max\_2\_:** Max Bracket of gb007\_1\_2\_

| Mean     | SD       | Min   | Max       | Obs |
|----------|----------|-------|-----------|-----|
| 2,638.23 | 5,104.58 | -1.00 | 20,000.00 | 180 |

**gb007\_1\_max\_3\_:** Max Bracket of gb007\_1\_3\_

| Mean     | SD       | Min   | Max       | Obs |
|----------|----------|-------|-----------|-----|
| 3,102.74 | 6,086.56 | -1.00 | 20,000.00 | 58  |

**gb007\_1\_max\_4\_:** Max Bracket of gb007\_1\_4\_

| Mean     | SD       | Min   | Max       | Obs |
|----------|----------|-------|-----------|-----|
| 1,999.23 | 5,440.88 | -1.00 | 20,000.00 | 26  |

**gb007\_1\_max\_5\_:** Max Bracket of gb007\_1\_5\_

| Mean     | SD       | Min   | Max      | Obs |
|----------|----------|-------|----------|-----|
| 1,374.38 | 2,264.28 | -1.00 | 5,000.00 | 8   |

**gb007\_1\_max\_6\_:** Max Bracket of gb007\_1\_6\_

| Mean     | SD       | Min   | Max      | Obs |
|----------|----------|-------|----------|-----|
| 1,666.00 | 2,887.33 | -1.00 | 5,000.00 | 3   |

**gb007\_1\_max\_7\_:** Max Bracket of gb007\_1\_7\_

| Mean  | SD | Min   | Max   | Obs |
|-------|----|-------|-------|-----|
| -1.00 | .  | -1.00 | -1.00 | 1   |

**gb007\_1\_max\_8\_:** Max Bracket of gb007\_1\_8\_

| Mean  | SD | Min   | Max   | Obs |
|-------|----|-------|-------|-----|
| -1.00 | .  | -1.00 | -1.00 | 1   |

**gb007\_2\_1\_:** Amount Increased HHMemberName[1] Receive

| Mean     | SD        | Min   | Max        | Obs |
|----------|-----------|-------|------------|-----|
| 9,882.38 | 15,925.61 | -1.00 | 100,000.00 | 53  |

**gb007\_2\_2\_:** Amount Increased HHMemberName[2] Receive

| Mean     | SD       | Min   | Max       | Obs |
|----------|----------|-------|-----------|-----|
| 6,383.25 | 7,924.13 | -1.00 | 30,000.00 | 12  |

**gb007\_2\_3\_:** Amount Increased HHMemberName[3] Receive

| Mean      | SD | Min       | Max       | Obs |
|-----------|----|-----------|-----------|-----|
| 15,000.00 | .  | 15,000.00 | 15,000.00 | 1   |

**gb007\_2\_6\_:** Amount Increased HHMemberName[6] Receive

| Mean      | SD | Min       | Max       | Obs |
|-----------|----|-----------|-----------|-----|
| 10,000.00 | .  | 10,000.00 | 10,000.00 | 1   |

**gb007\_2\_min\_1\_:** Min Bracket of gb007\_2\_1\_

| Mean     | SD       | Min   | Max       | Obs |
|----------|----------|-------|-----------|-----|
| 2,090.18 | 4,011.76 | -1.00 | 10,000.00 | 11  |

**gb007\_2\_min\_2\_:** Min Bracket of gb007\_2\_2\_

| Mean  | SD | Min   | Max   | Obs |
|-------|----|-------|-------|-----|
| -1.00 | .  | -1.00 | -1.00 | 1   |

**gb007\_2\_max\_1\_:** Max Bracket of gb007\_2\_1\_

| Mean     | SD       | Min   | Max       | Obs |
|----------|----------|-------|-----------|-----|
| 2,090.18 | 4,011.76 | -1.00 | 10,000.00 | 11  |

**gb007\_2\_max\_2\_:** Max Bracket of gb007\_2\_2\_

| Mean  | SD | Min   | Max   | Obs |
|-------|----|-------|-------|-----|
| -1.00 | .  | -1.00 | -1.00 | 1   |

**gb008\_1\_\_s7:** Medical Aid HHMemberName[1] Receive

|       | Freq. | %      |
|-------|-------|--------|
| 0 No  | 713   | 99.03  |
| 7 Yes | 7     | 0.97   |
| Total | 720   | 100.00 |

**gb008\_2\_\_s7:** Medical Aid HHMemberName[2] Receive

|       | Freq. | %     |
|-------|-------|-------|
| 0 No  | 877   | 99.89 |
| 7 Yes | 1     | 0.11  |

|       |     |        |
|-------|-----|--------|
| Total | 878 | 100.00 |
|-------|-----|--------|

**gb008\_3\_\_s7: Medical Aid HHMemberName[3] Receive**

|       | Freq. | %      |
|-------|-------|--------|
| 0 No  | 1,252 | 99.13  |
| 7 Yes | 11    | 0.87   |
| Total | 1,263 | 100.00 |

**gb008\_4\_\_s7: Medical Aid HHMemberName[4] Receive**

|       | Freq. | %      |
|-------|-------|--------|
| 0 No  | 810   | 99.63  |
| 7 Yes | 3     | 0.37   |
| Total | 813   | 100.00 |

**gb008\_5\_\_s7: Medical Aid HHMemberName[5] Receive**

|       | Freq. | %      |
|-------|-------|--------|
| 0 No  | 275   | 99.64  |
| 7 Yes | 1     | 0.36   |
| Total | 276   | 100.00 |

**gb008\_6\_\_s7: Medical Aid HHMemberName[6] Receive**

|       | Freq.  | %      |
|-------|--------|--------|
| 0 No  | 11,377 | 100.00 |
| Total | 11,377 | 100.00 |

**gb008\_7\_\_s7: Medical Aid HHMemberName[7] Receive**

|       | Freq.  | %      |
|-------|--------|--------|
| 0 No  | 11,377 | 100.00 |
| Total | 11,377 | 100.00 |

**gb008\_8\_\_s7: Medical Aid HHMemberName[8] Receive**

|       | Freq.  | %      |
|-------|--------|--------|
| 0 No  | 11,377 | 100.00 |
| Total | 11,377 | 100.00 |

**gb008\_9\_\_s7: Medical Aid HHMemberName[9] Receive**

|       | Freq.  | %      |
|-------|--------|--------|
| 0 No  | 11,377 | 100.00 |
| Total | 11,377 | 100.00 |

**gb008\_10\_\_s7: Medical Aid HHMemberName[10] Receive**

|       | Freq.  | %      |
|-------|--------|--------|
| 0 No  | 11,377 | 100.00 |
| Total | 11,377 | 100.00 |

## gb008\_11\_\_s7: Medical Aid HHMemberName[11] Receive

|       | Freq.  | %      |
|-------|--------|--------|
| 0 No  | 11,377 | 100.00 |
| Total | 11,377 | 100.00 |

## gb008\_12\_\_s7: Medical Aid HHMemberName[12] Receive

|       | Freq.  | %      |
|-------|--------|--------|
| 0 No  | 11,377 | 100.00 |
| Total | 11,377 | 100.00 |

## gb008\_1\_\_s8: Other Government Subsidy HHMemberName[1] Receive

|       | Freq. | %      |
|-------|-------|--------|
| 0 No  | 678   | 94.17  |
| 8 Yes | 42    | 5.83   |
| Total | 720   | 100.00 |

## gb008\_2\_\_s8: Other Government Subsidy HHMemberName[2] Receive

|       | Freq. | %      |
|-------|-------|--------|
| 0 No  | 829   | 94.42  |
| 8 Yes | 49    | 5.58   |
| Total | 878   | 100.00 |

## gb008\_3\_\_s8: Other Government Subsidy HHMemberName[3] Receive

|       | Freq. | %      |
|-------|-------|--------|
| 0 No  | 1,208 | 95.65  |
| 8 Yes | 55    | 4.35   |
| Total | 1,263 | 100.00 |

## gb008\_4\_\_s8: Other Government Subsidy HHMemberName[4] Receive

|       | Freq. | %      |
|-------|-------|--------|
| 0 No  | 792   | 97.42  |
| 8 Yes | 21    | 2.58   |
| Total | 813   | 100.00 |

## gb008\_5\_\_s8: Other Government Subsidy HHMemberName[5] Receive

|  | Freq. | % |
|--|-------|---|
|--|-------|---|

|       |     |        |
|-------|-----|--------|
| 0 No  | 272 | 98.55  |
| 8 Yes | 4   | 1.45   |
| Total | 276 | 100.00 |

**gb008\_6\_\_s8: Other Government Subsidy HHMemberName[6] Receive**

|       | Freq.  | %      |
|-------|--------|--------|
| 0 No  | 11,374 | 99.97  |
| 8 Yes | 3      | 0.03   |
| Total | 11,377 | 100.00 |

**gb008\_7\_\_s8: Other Government Subsidy HHMemberName[7] Receive**

|       | Freq.  | %      |
|-------|--------|--------|
| 0 No  | 11,376 | 99.99  |
| 8 Yes | 1      | 0.01   |
| Total | 11,377 | 100.00 |

**gb008\_8\_\_s8: Other Government Subsidy HHMemberName[8] Receive**

|       | Freq.  | %      |
|-------|--------|--------|
| 0 No  | 11,377 | 100.00 |
| Total | 11,377 | 100.00 |

**gb008\_9\_\_s8: Other Government Subsidy HHMemberName[9] Receive**

|       | Freq.  | %      |
|-------|--------|--------|
| 0 No  | 11,377 | 100.00 |
| Total | 11,377 | 100.00 |

**gb008\_10\_\_s8: Other Government Subsidy HHMemberName[10] Receive**

|       | Freq.  | %      |
|-------|--------|--------|
| 0 No  | 11,377 | 100.00 |
| Total | 11,377 | 100.00 |

**gb008\_11\_\_s8: Other Government Subsidy HHMemberName[11] Receive**

|       | Freq.  | %      |
|-------|--------|--------|
| 0 No  | 11,377 | 100.00 |
| Total | 11,377 | 100.00 |

**gb008\_12\_\_s8: Other Government Subsidy HHMemberName[12] Receive**

|       | Freq.  | %      |
|-------|--------|--------|
| 0 No  | 11,377 | 100.00 |
| Total | 11,377 | 100.00 |

**gb008\_1\_\_s9: Other Income Source HHMemberName[1] Receive**

|       | Freq. | %      |
|-------|-------|--------|
| 0 No  | 708   | 98.33  |
| 9 Yes | 12    | 1.67   |
| Total | 720   | 100.00 |

**gb008\_2\_\_s9: Other Income Source HHMemberName[2] Receive**

|       | Freq. | %      |
|-------|-------|--------|
| 0 No  | 868   | 98.86  |
| 9 Yes | 10    | 1.14   |
| Total | 878   | 100.00 |

**gb008\_3\_\_s9: Other Income Source HHMemberName[3] Receive**

|       | Freq. | %      |
|-------|-------|--------|
| 0 No  | 1,243 | 98.42  |
| 9 Yes | 20    | 1.58   |
| Total | 1,263 | 100.00 |

**gb008\_4\_\_s9: Other Income Source HHMemberName[4] Receive**

|       | Freq. | %      |
|-------|-------|--------|
| 0 No  | 804   | 98.89  |
| 9 Yes | 9     | 1.11   |
| Total | 813   | 100.00 |

**gb008\_5\_\_s9: Other Income Source HHMemberName[5] Receive**

|       | Freq. | %      |
|-------|-------|--------|
| 0 No  | 274   | 99.28  |
| 9 Yes | 2     | 0.72   |
| Total | 276   | 100.00 |

**gb008\_6\_\_s9: Other Income Source HHMemberName[6] Receive**

|       | Freq.  | %      |
|-------|--------|--------|
| 0 No  | 11,376 | 99.99  |
| 9 Yes | 1      | 0.01   |
| Total | 11,377 | 100.00 |

**gb008\_7\_\_s9: Other Income Source HHMemberName[7] Receive**

|       | Freq.  | %      |
|-------|--------|--------|
| 0 No  | 11,377 | 100.00 |
| Total | 11,377 | 100.00 |

**gb008\_8\_\_s9: Other Income Source HHMemberName[8] Receive**

|       | Freq.  | %      |
|-------|--------|--------|
| 0 No  | 11,377 | 100.00 |
| Total | 11,377 | 100.00 |

**gb008\_9\_\_s9: Other Income Source HHMemberName[9] Receive**

|       | Freq.  | %      |
|-------|--------|--------|
| 0 No  | 11,377 | 100.00 |
| Total | 11,377 | 100.00 |

**gb008\_10\_\_s9: Other Income Source HHMemberName[10] Receive**

|       | Freq.  | %      |
|-------|--------|--------|
| 0 No  | 11,377 | 100.00 |
| Total | 11,377 | 100.00 |

**gb008\_11\_\_s9: Other Income Source HHMemberName[11] Receive**

|       | Freq.  | %      |
|-------|--------|--------|
| 0 No  | 11,377 | 100.00 |
| Total | 11,377 | 100.00 |

**gb008\_12\_\_s9: Other Income Source HHMemberName[12] Receive**

|       | Freq.  | %      |
|-------|--------|--------|
| 0 No  | 11,377 | 100.00 |
| Total | 11,377 | 100.00 |

**gb008\_1\_\_s10: None of the Above HHMemberName[1] Receive**

|        | Freq. | %      |
|--------|-------|--------|
| 0 No   | 56    | 7.78   |
| 10 Yes | 664   | 92.22  |
| Total  | 720   | 100.00 |

**gb008\_2\_\_s10: None of the Above HHMemberName[2] Receive**

|        | Freq. | %      |
|--------|-------|--------|
| 0 No   | 59    | 6.72   |
| 10 Yes | 819   | 93.28  |
| Total  | 878   | 100.00 |

**gb008\_3\_\_s10: None of the Above HHMemberName[3] Receive**

|  | Freq. | % |
|--|-------|---|
|--|-------|---|



|        |       |        |
|--------|-------|--------|
| 0 No   | 75    | 5.94   |
| 10 Yes | 1,188 | 94.06  |
| Total  | 1,263 | 100.00 |

**gb008\_4\_\_s10:** None of the Above HHMemberName[4] Receive

|        | Freq. | %      |
|--------|-------|--------|
| 0 No   | 30    | 3.69   |
| 10 Yes | 783   | 96.31  |
| Total  | 813   | 100.00 |

**gb008\_5\_\_s10:** None of the Above HHMemberName[5] Receive

|        | Freq. | %      |
|--------|-------|--------|
| 0 No   | 6     | 2.17   |
| 10 Yes | 270   | 97.83  |
| Total  | 276   | 100.00 |

**gb008\_6\_\_s10:** None of the Above HHMemberName[6] Receive

|        | Freq.  | %      |
|--------|--------|--------|
| 0 No   | 11,262 | 98.99  |
| 10 Yes | 115    | 1.01   |
| Total  | 11,377 | 100.00 |

**gb008\_7\_\_s10:** None of the Above HHMemberName[7] Receive

|        | Freq.  | %      |
|--------|--------|--------|
| 0 No   | 11,312 | 99.43  |
| 10 Yes | 65     | 0.57   |
| Total  | 11,377 | 100.00 |

**gb008\_8\_\_s10:** None of the Above HHMemberName[8] Receive

|        | Freq.  | %      |
|--------|--------|--------|
| 0 No   | 11,344 | 99.71  |
| 10 Yes | 33     | 0.29   |
| Total  | 11,377 | 100.00 |

**gb008\_9\_\_s10:** None of the Above HHMemberName[9] Receive

|        | Freq.  | %      |
|--------|--------|--------|
| 0 No   | 11,357 | 99.82  |
| 10 Yes | 20     | 0.18   |
| Total  | 11,377 | 100.00 |

**gb008\_10\_\_s10:** None of the Above HHMemberName[10] Receive

|        | Freq.  | %      |
|--------|--------|--------|
| 0 No   | 11,368 | 99.92  |
| 10 Yes | 9      | 0.08   |
| Total  | 11,377 | 100.00 |

**gb008\_11\_s10:** None of the Above HHMemberName[11] Receive

|        | Freq.  | %      |
|--------|--------|--------|
| 0 No   | 11,372 | 99.96  |
| 10 Yes | 5      | 0.04   |
| Total  | 11,377 | 100.00 |

**gb008\_12\_s10:** None of the Above HHMemberName[12] Receive

|        | Freq.  | %      |
|--------|--------|--------|
| 0 No   | 11,375 | 99.98  |
| 10 Yes | 2      | 0.02   |
| Total  | 11,377 | 100.00 |

**gb008\_7\_1\_:** Medical Aid Amount HHMemberName[1] Receive

| Mean     | SD       | Min   | Max       | Obs |
|----------|----------|-------|-----------|-----|
| 3,365.57 | 7,366.51 | -1.00 | 20,000.00 | 7   |

**gb008\_7\_2\_:** Medical Aid Amount HHMemberName[2] Receive

| Mean      | SD | Min       | Max       | Obs |
|-----------|----|-----------|-----------|-----|
| 10,000.00 | .  | 10,000.00 | 10,000.00 | 1   |

**gb008\_7\_3\_:** Medical Aid Amount HHMemberName[3] Receive

| Mean     | SD       | Min   | Max       | Obs |
|----------|----------|-------|-----------|-----|
| 3,093.09 | 5,820.32 | -1.00 | 18,000.00 | 11  |

**gb008\_7\_4\_:** Medical Aid Amount HHMemberName[4] Receive

| Mean   | SD     | Min   | Max    | Obs |
|--------|--------|-------|--------|-----|
| 299.67 | 360.97 | -1.00 | 700.00 | 3   |

**gb008\_7\_5\_:** Medical Aid Amount HHMemberName[5] Receive

| Mean  | SD | Min   | Max   | Obs |
|-------|----|-------|-------|-----|
| -1.00 | .  | -1.00 | -1.00 | 1   |

**gb008\_8\_1\_:** Other Government Subsidy Amount HHMemberName[1] Receive

| Mean   | SD     | Min   | Max      | Obs |
|--------|--------|-------|----------|-----|
| 687.52 | 585.10 | -1.00 | 2,520.00 | 42  |

**gb008\_8\_2\_:** Other Government Subsidy Amount HHMemberName[2] Receive

| Mean   | SD     | Min   | Max      | Obs |
|--------|--------|-------|----------|-----|
| 742.69 | 793.36 | -1.00 | 4,000.00 | 49  |

**gb008\_8\_3\_:** Other Government Subsidy Amount HHMemberName[3] Receive

| Mean   | SD       | Min   | Max       | Obs |
|--------|----------|-------|-----------|-----|
| 911.09 | 1,971.90 | -1.00 | 10,000.00 | 55  |

**gb008\_8\_4\_:** Other Government Subsidy Amount HHMemberName[4] Receive

| Mean   | SD     | Min   | Max      | Obs |
|--------|--------|-------|----------|-----|
| 504.33 | 415.61 | -1.00 | 1,400.00 | 21  |

**gb008\_8\_5\_:** Other Government Subsidy Amount HHMemberName[5] Receive

| Mean   | SD     | Min   | Max      | Obs |
|--------|--------|-------|----------|-----|
| 512.25 | 466.51 | -1.00 | 1,000.00 | 4   |

**gb008\_8\_6\_:** Other Government Subsidy Amount HHMemberName[6] Receive

| Mean   | SD     | Min    | Max    | Obs |
|--------|--------|--------|--------|-----|
| 316.67 | 160.73 | 200.00 | 500.00 | 3   |

**gb008\_8\_7\_:** Other Government Subsidy Amount HHMemberName[7] Receive

| Mean   | SD | Min    | Max    | Obs |
|--------|----|--------|--------|-----|
| 500.00 | .  | 500.00 | 500.00 | 1   |

**gb008\_9\_1\_:** Other Income Source Amount HHMemberName[1] Receive

| Mean   | SD     | Min    | Max      | Obs |
|--------|--------|--------|----------|-----|
| 682.50 | 513.05 | 150.00 | 2,000.00 | 12  |

**gb008\_9\_2\_:** Other Income Source Amount HHMemberName[2] Receive

| Mean   | SD     | Min    | Max      | Obs |
|--------|--------|--------|----------|-----|
| 572.00 | 357.08 | 100.00 | 1,000.00 | 10  |

**gb008\_9\_3\_:** Other Income Source Amount HHMemberName[3] Receive

| Mean   | SD       | Min   | Max      | Obs |
|--------|----------|-------|----------|-----|
| 791.55 | 1,018.22 | -1.00 | 3,600.00 | 20  |

**gb008\_9\_4\_:** Other Income Source Amount HHMemberName[4] Receive

| Mean   | SD     | Min   | Max      | Obs |
|--------|--------|-------|----------|-----|
| 520.44 | 617.35 | -1.00 | 1,840.00 | 9   |

**gb008\_9\_5\_:** Other Income Source Amount HHMemberName[5] Receive

| Mean  | SD    | Min   | Max    | Obs |
|-------|-------|-------|--------|-----|
| 49.50 | 71.42 | -1.00 | 100.00 | 2   |

**gb008\_9\_6\_:** Other Income Source Amount HHMemberName[6] Receive

| Mean   | SD | Min    | Max    | Obs |
|--------|----|--------|--------|-----|
| 420.00 | .  | 420.00 | 420.00 | 1   |

**gc001:** Engage in Agricultural Work

|       | Freq.  | %      |
|-------|--------|--------|
| 1 Yes | 5,866  | 51.62  |
| 2 No  | 5,497  | 48.38  |
| Total | 11,363 | 100.00 |

**gc002\_s1:** HHMemberName[1] Engaged in Agricultural Work

|       | Freq. | %      |
|-------|-------|--------|
| 0 No  | 4,702 | 80.16  |
| 1 Yes | 1,164 | 19.84  |
| Total | 5,866 | 100.00 |

**gc002\_s2:** HHMemberName[2] Engaged in Agricultural Work

|       | Freq. | %      |
|-------|-------|--------|
| 0 No  | 5,295 | 90.27  |
| 2 Yes | 571   | 9.73   |
| Total | 5,866 | 100.00 |

**gc002\_s3:** HHMemberName[3] Engaged in Agricultural Work

|       | Freq. | %      |
|-------|-------|--------|
| 0 No  | 5,735 | 97.77  |
| 3 Yes | 131   | 2.23   |
| Total | 5,866 | 100.00 |

**gc002\_s4: HHMemberName[4] Engaged in Agricultural Work**

|       | Freq. | %      |
|-------|-------|--------|
| 0 No  | 5,789 | 98.69  |
| 4 Yes | 77    | 1.31   |
| Total | 5,866 | 100.00 |

**gc002\_s5: HHMemberName[5] Engaged in Agricultural Work**

|       | Freq. | %      |
|-------|-------|--------|
| 0 No  | 5,844 | 99.62  |
| 5 Yes | 22    | 0.38   |
| Total | 5,866 | 100.00 |

**gc002\_s6: HHMemberName[6] Engaged in Agricultural Work**

|       | Freq. | %      |
|-------|-------|--------|
| 0 No  | 5,859 | 99.88  |
| 6 Yes | 7     | 0.12   |
| Total | 5,866 | 100.00 |

**gc002\_s7: HHMemberName[7] Engaged in Agricultural Work**

|       | Freq. | %      |
|-------|-------|--------|
| 0 No  | 5,863 | 99.95  |
| 7 Yes | 3     | 0.05   |
| Total | 5,866 | 100.00 |

**gc002\_s8: HHMemberName[8] Engaged in Agricultural Work**

|       | Freq. | %      |
|-------|-------|--------|
| 0 No  | 5,863 | 99.95  |
| 8 Yes | 3     | 0.05   |
| Total | 5,866 | 100.00 |

**gc002\_s9: HHMemberName[9] Engaged in Agricultural Work**

|       | Freq. | %      |
|-------|-------|--------|
| 0 No  | 5,865 | 99.98  |
| 9 Yes | 1     | 0.02   |
| Total | 5,866 | 100.00 |

**gc002\_s10: HHMemberName[10] Engaged in Agricultural Work**

|        | Freq. | %      |
|--------|-------|--------|
| 0 No   | 5,865 | 99.98  |
| 10 Yes | 1     | 0.02   |
| Total  | 5,866 | 100.00 |

**gc002\_s11: HHMemberName[11] Engaged in Agricultural Work**

|       | Freq. | %      |
|-------|-------|--------|
| 0 No  | 5,866 | 100.00 |
| Total | 5,866 | 100.00 |

**gc002\_s12: HHMemberName[12] Engaged in Agricultural Work**

|       | Freq. | %      |
|-------|-------|--------|
| 0 No  | 5,866 | 100.00 |
| Total | 5,866 | 100.00 |

**gc002\_s13: HHMemberName[13] Engaged in Agricultural Work**

|       | Freq. | %      |
|-------|-------|--------|
| 0 No  | 5,866 | 100.00 |
| Total | 5,866 | 100.00 |

**gc002\_s14: HHMemberName[14] Engaged in Agricultural Work**

|       | Freq. | %      |
|-------|-------|--------|
| 0 No  | 5,866 | 100.00 |
| Total | 5,866 | 100.00 |

**gc002\_s15: HHMemberName[15] Engaged in Agricultural Work**

|       | Freq. | %      |
|-------|-------|--------|
| 0 No  | 5,866 | 100.00 |
| Total | 5,866 | 100.00 |

**gc002\_s16: HHMemberName[16] Engaged in Agricultural Work**

|       | Freq. | %      |
|-------|-------|--------|
| 0 No  | 5,866 | 100.00 |
| Total | 5,866 | 100.00 |

**gc002\_s17: HHMemberName[17] Engaged in Agricultural Work**

|       | Freq. | %      |
|-------|-------|--------|
| 0 No  | 5,866 | 100.00 |
| Total | 5,866 | 100.00 |

**gc002\_s18: HHMemberName[18] Engaged in Agricultural Work**

|       | Freq. | %      |
|-------|-------|--------|
| 0 No  | 5,866 | 100.00 |
| Total | 5,866 | 100.00 |

**gc002\_s19: HHMemberName[19] Engaged in Agricultural Work**

|       | Freq. | %      |
|-------|-------|--------|
| 0 No  | 5,866 | 100.00 |
| Total | 5,866 | 100.00 |

**gc002\_s20: HHMemberName[20] Engaged in Agricultural Work**

|       | Freq. | %      |
|-------|-------|--------|
| 0 No  | 5,866 | 100.00 |
| Total | 5,866 | 100.00 |

**gc002\_s21: HHMemberName[21] Engaged in Agricultural Work**

|       | Freq. | %      |
|-------|-------|--------|
| 0 No  | 5,866 | 100.00 |
| Total | 5,866 | 100.00 |

**gc002\_s22: HHMemberName[22] Engaged in Agricultural Work**

|       | Freq. | %      |
|-------|-------|--------|
| 0 No  | 5,866 | 100.00 |
| Total | 5,866 | 100.00 |

**gc002\_s23: HHMemberName[23] Engaged in Agricultural Work**

|       | Freq. | %      |
|-------|-------|--------|
| 0 No  | 5,866 | 100.00 |
| Total | 5,866 | 100.00 |

**gc002\_s24: HHMemberName[24] Engaged in Agricultural Work**

|       | Freq. | %      |
|-------|-------|--------|
| 0 No  | 5,866 | 100.00 |
| Total | 5,866 | 100.00 |

**gc002\_s25: HHMemberName[25] Engaged in Agricultural Work**

|       | Freq. | %      |
|-------|-------|--------|
| 0 No  | 5,866 | 100.00 |
| Total | 5,866 | 100.00 |

**gc002\_s26: Main Respondent Engage in Agricultural Work**

|        | Freq. | %     |
|--------|-------|-------|
| 0 No   | 1,011 | 17.23 |
| 26 Yes | 4,855 | 82.77 |

|       |       |        |
|-------|-------|--------|
| Total | 5,866 | 100.00 |
|-------|-------|--------|

### gc002\_s27: Main Respondent's Spouse Engage in Agricultural Work

|        | Freq. | %      |
|--------|-------|--------|
| 0 No   | 2,039 | 34.76  |
| 27 Yes | 3,827 | 65.24  |
| Total  | 5,866 | 100.00 |

### gc003: Engage in Cropping or Forestry

|       | Freq. | %      |
|-------|-------|--------|
| 1 Yes | 5,152 | 87.84  |
| 2 No  | 713   | 12.16  |
| Total | 5,865 | 100.00 |

### gc004: Earn or Lose Money in Cropping or Forestry

|              | Freq. | %      |
|--------------|-------|--------|
| 1 Earn Money | 2,743 | 53.24  |
| 2 Lose Money | 802   | 15.57  |
| 3 Break-even | 1,607 | 31.19  |
| Total        | 5,152 | 100.00 |

### gc004\_1: Money Earned in Cropping or Forestry

| Mean     | SD        | Min   | Max        | Obs   |
|----------|-----------|-------|------------|-------|
| 7,074.21 | 13,729.23 | -1.00 | 300,000.00 | 2,743 |

### gc004\_1\_min: Min Bracket of gc004\_1

| Mean     | SD        | Min   | Max        | Obs |
|----------|-----------|-------|------------|-----|
| 5,340.41 | 15,756.86 | -1.00 | 100,000.00 | 88  |

### gc004\_1\_max: Max Bracket of gc004\_1

| Mean     | SD        | Min   | Max        | Obs |
|----------|-----------|-------|------------|-----|
| 4,625.59 | 11,418.19 | -1.00 | 100,000.00 | 147 |

### gc004\_2: Money Lost in Cropping or Forestry

| Mean     | SD        | Min   | Max        | Obs |
|----------|-----------|-------|------------|-----|
| 6,347.69 | 20,900.76 | -1.00 | 350,000.00 | 802 |

### gc004\_2\_min: Min Bracket of gc004\_2

| Mean | SD | Min | Max | Obs |
|------|----|-----|-----|-----|
|------|----|-----|-----|-----|



|          |           |       |            |    |
|----------|-----------|-------|------------|----|
| 5,332.91 | 13,736.22 | -1.00 | 100,000.00 | 54 |
|----------|-----------|-------|------------|----|

**gc004\_2\_max: Max Bracket of gc004\_2**

| Mean     | SD        | Min   | Max       | Obs |
|----------|-----------|-------|-----------|-----|
| 6,307.40 | 13,028.89 | -1.00 | 50,000.00 | 78  |

**gc005: Grow Livestock or Aquatic Life**

|       | Freq. | %      |
|-------|-------|--------|
| 1 Yes | 3,046 | 51.94  |
| 2 No  | 2,819 | 48.06  |
| Total | 5,865 | 100.00 |

**gc006: Earn or Lose Money in Livestock or Aquatic Life**

|              | Freq. | %      |
|--------------|-------|--------|
| 1 Earn Money | 1,252 | 41.10  |
| 2 Lose Money | 668   | 21.93  |
| 3 Break-even | 1,126 | 36.97  |
| Total        | 3,046 | 100.00 |

**gc006\_1: Money Earned in Livestock or Aquatic Life**

| Mean     | SD        | Min   | Max        | Obs   |
|----------|-----------|-------|------------|-------|
| 8,517.85 | 20,675.99 | -1.00 | 300,000.00 | 1,252 |

**gc006\_1\_min: Min Bracket of gc006\_1**

| Mean     | SD        | Min   | Max        | Obs |
|----------|-----------|-------|------------|-----|
| 7,772.27 | 18,977.37 | -1.00 | 100,000.00 | 44  |

**gc006\_1\_max: Max Bracket of gc006\_1**

| Mean      | SD        | Min   | Max        | Obs |
|-----------|-----------|-------|------------|-----|
| 10,397.05 | 22,952.79 | -1.00 | 100,000.00 | 73  |

**gc006\_2: Money Lost in Livestock or Aquatic Life**

| Mean      | SD        | Min   | Max        | Obs |
|-----------|-----------|-------|------------|-----|
| 11,815.75 | 52,808.22 | -1.00 | 800,000.00 | 668 |

**gc006\_2\_min: Min Bracket of gc006\_2**

| Mean     | SD        | Min   | Max        | Obs |
|----------|-----------|-------|------------|-----|
| 8,399.65 | 22,718.93 | -1.00 | 100,000.00 | 40  |

**gc006\_2\_max: Max Bracket of gc006\_2**

| Mean     | SD        | Min   | Max        | Obs |
|----------|-----------|-------|------------|-----|
| 5,999.86 | 14,847.67 | -1.00 | 100,000.00 | 63  |

**gc007: Impact of COVID on Agricultural Income**

|            | Freq.  | %      |
|------------|--------|--------|
| 1 Decrease | 1,767  | 15.55  |
| 2 Increase | 43     | 0.38   |
| 3 Unchange | 9,551  | 84.07  |
| Total      | 11,361 | 100.00 |

**gc007\_1: Amount Decreased**

| Mean     | SD        | Min   | Max          | Obs   |
|----------|-----------|-------|--------------|-------|
| 8,362.13 | 36,869.73 | -1.00 | 1,000,000.00 | 1,767 |

**gc007\_1\_min: Min Bracket of gc007\_1**

| Mean     | SD       | Min   | Max       | Obs |
|----------|----------|-------|-----------|-----|
| 2,248.94 | 3,414.13 | -1.00 | 10,000.00 | 191 |

**gc007\_1\_max: Max Bracket of gc007\_1**

| Mean     | SD       | Min   | Max       | Obs |
|----------|----------|-------|-----------|-----|
| 2,335.73 | 3,324.46 | -1.00 | 10,000.00 | 183 |

**gc007\_2: Amount Increased**

| Mean     | SD        | Min   | Max       | Obs |
|----------|-----------|-------|-----------|-----|
| 7,106.02 | 12,129.92 | -1.00 | 60,000.00 | 43  |

**gc007\_2\_min: Min Bracket of gc007\_2**

| Mean     | SD       | Min   | Max      | Obs |
|----------|----------|-------|----------|-----|
| 1,733.00 | 2,831.09 | -1.00 | 5,000.00 | 3   |

**gc007\_2\_max: Max Bracket of gc007\_2**

| Mean     | SD       | Min   | Max      | Obs |
|----------|----------|-------|----------|-----|
| 1,833.00 | 2,754.12 | -1.00 | 5,000.00 | 3   |

**gd001: Engage in Self-employed Activities**

|  | Freq. | % |
|--|-------|---|
|--|-------|---|

|       |        |        |
|-------|--------|--------|
| 1 Yes | 1,285  | 11.31  |
| 2 No  | 10,075 | 88.69  |
| Total | 11,360 | 100.00 |

**gd002: Number of Self-employed Activities**

| Mean | SD   | Min  | Max  | Obs   |
|------|------|------|------|-------|
| 1.09 | 0.30 | 1.00 | 3.00 | 1,285 |

**gd003\_s1: HHMemberName[1] Engage in Self-employed Activities**

|       | Freq. | %      |
|-------|-------|--------|
| 0 No  | 802   | 62.41  |
| 1 Yes | 483   | 37.59  |
| Total | 1,285 | 100.00 |

**gd003\_s2: HHMemberName[2] Engage in Self-employed Activities**

|       | Freq. | %      |
|-------|-------|--------|
| 0 No  | 1,056 | 82.18  |
| 2 Yes | 229   | 17.82  |
| Total | 1,285 | 100.00 |

**gd003\_s3: HHMemberName[3] Engage in Self-employed Activities**

|       | Freq. | %      |
|-------|-------|--------|
| 0 No  | 1,226 | 95.41  |
| 3 Yes | 59    | 4.59   |
| Total | 1,285 | 100.00 |

**gd003\_s4: HHMemberName[4] Engage in Self-employed Activities**

|       | Freq. | %      |
|-------|-------|--------|
| 0 No  | 1,263 | 98.29  |
| 4 Yes | 22    | 1.71   |
| Total | 1,285 | 100.00 |

**gd003\_s5: HHMemberName[5] Engage in Self-employed Activities**

|       | Freq. | %      |
|-------|-------|--------|
| 0 No  | 1,279 | 99.53  |
| 5 Yes | 6     | 0.47   |
| Total | 1,285 | 100.00 |

**gd003\_s6: HHMemberName[6] Engage in Self-employed Activities**

|      | Freq. | %      |
|------|-------|--------|
| 0 No | 1,285 | 100.00 |

|       |       |        |
|-------|-------|--------|
| Total | 1,285 | 100.00 |
|-------|-------|--------|

**gd003\_s7: HHMemberName[7] Engage in Self-employed Activities**

|       | Freq. | %      |
|-------|-------|--------|
| 0 No  | 1,284 | 99.92  |
| 7 Yes | 1     | 0.08   |
| Total | 1,285 | 100.00 |

**gd003\_s8: HHMemberName[8] Engage in Self-employed Activities**

|       | Freq. | %      |
|-------|-------|--------|
| 0 No  | 1,284 | 99.92  |
| 8 Yes | 1     | 0.08   |
| Total | 1,285 | 100.00 |

**gd003\_s9: HHMemberName[9] Engage in Self-employed Activities**

|       | Freq. | %      |
|-------|-------|--------|
| 0 No  | 1,285 | 100.00 |
| Total | 1,285 | 100.00 |

**gd003\_s10: HHMemberName[10] Engage in Self-employed Activities**

|       | Freq. | %      |
|-------|-------|--------|
| 0 No  | 1,285 | 100.00 |
| Total | 1,285 | 100.00 |

**gd003\_s11: HHMemberName[11] Engage in Self-employed Activities**

|       | Freq. | %      |
|-------|-------|--------|
| 0 No  | 1,285 | 100.00 |
| Total | 1,285 | 100.00 |

**gd003\_s12: HHMemberName[12] Engage in Self-employed Activities**

|       | Freq. | %      |
|-------|-------|--------|
| 0 No  | 1,285 | 100.00 |
| Total | 1,285 | 100.00 |

**gd003\_s13: HHMemberName[13] Engage in Self-employed Activities**

|       | Freq. | %      |
|-------|-------|--------|
| 0 No  | 1,285 | 100.00 |
| Total | 1,285 | 100.00 |

**gd003\_s14: HHMemberName[14] Engage in Self-employed Activities**

|       | Freq. | %      |
|-------|-------|--------|
| 0 No  | 1,285 | 100.00 |
| Total | 1,285 | 100.00 |

**gd003\_s15: HHMemberName[15] Engage in Self-employed Activities**

|       | Freq. | %      |
|-------|-------|--------|
| 0 No  | 1,285 | 100.00 |
| Total | 1,285 | 100.00 |

**gd003\_s16: HHMemberName[16] Engage in Self-employed Activities**

|       | Freq. | %      |
|-------|-------|--------|
| 0 No  | 1,285 | 100.00 |
| Total | 1,285 | 100.00 |

**gd003\_s17: HHMemberName[17] Engage in Self-employed Activities**

|       | Freq. | %      |
|-------|-------|--------|
| 0 No  | 1,285 | 100.00 |
| Total | 1,285 | 100.00 |

**gd003\_s18: HHMemberName[18] Engage in Self-employed Activities**

|       | Freq. | %      |
|-------|-------|--------|
| 0 No  | 1,285 | 100.00 |
| Total | 1,285 | 100.00 |

**gd003\_s19: HHMemberName[19] Engage in Self-employed Activities**

|       | Freq. | %      |
|-------|-------|--------|
| 0 No  | 1,285 | 100.00 |
| Total | 1,285 | 100.00 |

**gd003\_s20: HHMemberName[20] Engage in Self-employed Activities**

|       | Freq. | %      |
|-------|-------|--------|
| 0 No  | 1,285 | 100.00 |
| Total | 1,285 | 100.00 |

**gd003\_s21: HHMemberName[21] Engage in Self-employed Activities**

|       | Freq. | %      |
|-------|-------|--------|
| 0 No  | 1,285 | 100.00 |
| Total | 1,285 | 100.00 |

**gd003\_s22: HHMemberName[22] Engage in Self-employed Activities**

|       | Freq. | %      |
|-------|-------|--------|
| 0 No  | 1,285 | 100.00 |
| Total | 1,285 | 100.00 |

**gd003\_s23: HHMemberName[23] Engage in Self-employed Activities**

|       | Freq. | %      |
|-------|-------|--------|
| 0 No  | 1,285 | 100.00 |
| Total | 1,285 | 100.00 |

**gd003\_s24: HHMemberName[24] Engage in Self-employed Activities**

|       | Freq. | %      |
|-------|-------|--------|
| 0 No  | 1,285 | 100.00 |
| Total | 1,285 | 100.00 |

**gd003\_s25: HHMemberName[25] Engage in Self-employed Activities**

|       | Freq. | %      |
|-------|-------|--------|
| 0 No  | 1,285 | 100.00 |
| Total | 1,285 | 100.00 |

**gd003\_s26: Main Respondent Engage in Self-employed Activities**

|        | Freq. | %      |
|--------|-------|--------|
| 0 No   | 571   | 44.44  |
| 26 Yes | 714   | 55.56  |
| Total  | 1,285 | 100.00 |

**gd003\_s27: Main Respondent's Spouse Engage in Self-employed Activities**

|        | Freq. | %      |
|--------|-------|--------|
| 0 No   | 681   | 53.00  |
| 27 Yes | 604   | 47.00  |
| Total  | 1,285 | 100.00 |

**gd004: Earn or Lose Money in Self-employed Activities**

|                       | Freq. | %      |
|-----------------------|-------|--------|
| 1 Earn Money          | 881   | 68.56  |
| 2 Lose Money          | 204   | 15.88  |
| 3 Break-even          | 169   | 13.15  |
| 999 Refused to Answer | 31    | 2.41   |
| Total                 | 1,285 | 100.00 |

**gd004\_1: Money Earned in Self-employed Activities**

| Mean      | SD        | Min   | Max          | Obs |
|-----------|-----------|-------|--------------|-----|
| 40,650.61 | 77,759.78 | -1.00 | 1,000,000.00 | 881 |

**gd004\_1\_min: Min Bracket of gd004\_1**

| Mean      | SD        | Min   | Max        | Obs |
|-----------|-----------|-------|------------|-----|
| 18,937.14 | 37,185.10 | -1.00 | 200,000.00 | 80  |

**gd004\_1\_max: Max Bracket of gd004\_1**

| Mean      | SD        | Min   | Max        | Obs |
|-----------|-----------|-------|------------|-----|
| 28,218.03 | 42,447.04 | -1.00 | 200,000.00 | 87  |

**gd004\_2: Money Lost in Self-employed Activities**

| Mean      | SD         | Min   | Max          | Obs |
|-----------|------------|-------|--------------|-----|
| 74,122.74 | 208,906.71 | -1.00 | 2,000,000.00 | 204 |

**gd004\_2\_min: Min Bracket of gd004\_2**

| Mean      | SD        | Min   | Max        | Obs |
|-----------|-----------|-------|------------|-----|
| 47,580.19 | 78,643.69 | -1.00 | 200,000.00 | 31  |

**gd004\_2\_max: Max Bracket of gd004\_2**

| Mean      | SD        | Min   | Max        | Obs |
|-----------|-----------|-------|------------|-----|
| 38,928.14 | 57,869.20 | -1.00 | 200,000.00 | 28  |

**gd005: Impact of COVID on Incomes from Self-employed Activities**

|            | Freq.  | %      |
|------------|--------|--------|
| 1 Decrease | 1,310  | 11.53  |
| 2 Increase | 17     | 0.15   |
| 3 Unchange | 10,033 | 88.32  |
| Total      | 11,360 | 100.00 |

**gd005\_1: Amount Decreased**

| Mean      | SD        | Min   | Max        | Obs   |
|-----------|-----------|-------|------------|-------|
| 21,242.72 | 47,732.84 | -1.00 | 700,000.00 | 1,310 |

**gd005\_1\_min: Min Bracket of gd005\_1**

| Mean     | SD       | Min   | Max       | Obs |
|----------|----------|-------|-----------|-----|
| 6,585.66 | 8,022.44 | -1.00 | 20,000.00 | 186 |

**gd005\_1\_max: Max Bracket of gd005\_1**

| Mean     | SD       | Min   | Max       | Obs |
|----------|----------|-------|-----------|-----|
| 4,593.27 | 6,700.13 | -1.00 | 20,000.00 | 160 |

**gd005\_2: Amount Increased**

| Mean      | SD        | Min   | Max       | Obs |
|-----------|-----------|-------|-----------|-----|
| 15,294.00 | 17,563.44 | -1.00 | 60,000.00 | 17  |

**gd005\_2\_min: Min Bracket of gd005\_2**

| Mean     | SD       | Min    | Max       | Obs |
|----------|----------|--------|-----------|-----|
| 5,250.00 | 6,717.51 | 500.00 | 10,000.00 | 2   |

**gd005\_2\_max: Max Bracket of gd005\_2**

| Mean     | SD       | Min    | Max       | Obs |
|----------|----------|--------|-----------|-----|
| 5,250.00 | 6,717.51 | 500.00 | 10,000.00 | 2   |

**gd006: Impact of COVID on Self-employed Activities**

|                                           | Freq.  | %      |
|-------------------------------------------|--------|--------|
| 1 Do not Have before and after COVID      | 10,004 | 88.07  |
| 2 Have before and after COVID             | 1,139  | 10.03  |
| 3 Do not Have before COVID and Have after | 63     | 0.55   |
| 4 Have before COVID and Do not Have after | 153    | 1.35   |
| Total                                     | 11,359 | 100.00 |

**gd007\_s1: Government Load**

|       | Freq. | %      |
|-------|-------|--------|
| 0 No  | 1,167 | 97.09  |
| 1 Yes | 35    | 2.91   |
| Total | 1,202 | 100.00 |

**gd007\_s2: Rent Relief**

|       | Freq. | %      |
|-------|-------|--------|
| 0 No  | 1,149 | 95.59  |
| 2 Yes | 53    | 4.41   |
| Total | 1,202 | 100.00 |

**gd007\_s3: Tax Deduction**

|      | Freq. | %     |
|------|-------|-------|
| 0 No | 1,152 | 95.84 |



|       |       |        |
|-------|-------|--------|
| 3 Yes | 50    | 4.16   |
| Total | 1,202 | 100.00 |

**gd007\_s4: Other Subsidies**

|       | Freq. | %      |
|-------|-------|--------|
| 0 No  | 1,187 | 98.75  |
| 4 Yes | 15    | 1.25   |
| Total | 1,202 | 100.00 |

**gd007\_s5: None of Above**

|       | Freq. | %      |
|-------|-------|--------|
| 0 No  | 135   | 11.23  |
| 5 Yes | 1,067 | 88.77  |
| Total | 1,202 | 100.00 |

**gd007\_1: Amount of Government Load**

| Mean       | SD         | Min   | Max          | Obs |
|------------|------------|-------|--------------|-----|
| 146,742.57 | 340,533.22 | -1.00 | 2,000,000.00 | 35  |

**gd007\_2: Interest Rate of Government Load(%)**

| Mean | SD   | Min   | Max  | Obs |
|------|------|-------|------|-----|
| 0.55 | 2.20 | -1.00 | 6.80 | 35  |

**gd007\_3: Amount of Rent Relief**

| Mean      | SD        | Min   | Max        | Obs |
|-----------|-----------|-------|------------|-----|
| 10,046.47 | 18,051.26 | -1.00 | 105,000.00 | 53  |

**gd007\_4: Amount of Tax Deduction**

| Mean     | SD       | Min   | Max       | Obs |
|----------|----------|-------|-----------|-----|
| 2,925.16 | 8,642.83 | -1.00 | 50,000.00 | 50  |

**gd007\_6: Amount of Other Subsidies**

| Mean     | SD        | Min   | Max       | Obs |
|----------|-----------|-------|-----------|-----|
| 4,223.60 | 12,782.45 | -1.00 | 50,000.00 | 15  |

**ge008: Government COVID Subsidy for Household Member and Household**

|       | Freq.  | %     |
|-------|--------|-------|
| 1 Yes | 311    | 2.74  |
| 2 No  | 11,048 | 97.26 |

|       |        |        |
|-------|--------|--------|
| Total | 11,359 | 100.00 |
|-------|--------|--------|

### ge008\_1: Amount of Government COVID Subsidy

| Mean   | SD       | Min   | Max       | Obs |
|--------|----------|-------|-----------|-----|
| 464.49 | 1,312.20 | -1.00 | 13,000.00 | 311 |

### ge008\_1\_min: Min Bracket of ge008\_1

| Mean   | SD     | Min   | Max      | Obs |
|--------|--------|-------|----------|-----|
| 249.14 | 957.66 | -1.00 | 5,000.00 | 28  |

### ge008\_1\_max: Max Bracket of ge008\_1

| Mean   | SD       | Min   | Max       | Obs |
|--------|----------|-------|-----------|-----|
| 471.56 | 1,664.72 | -1.00 | 10,000.00 | 36  |

### ge001\_s1: Wubao Household/Older

|       | Freq.  | %      |
|-------|--------|--------|
| 0 No  | 11,231 | 98.87  |
| 1 Yes | 128    | 1.13   |
| Total | 11,359 | 100.00 |

### ge001\_s2: Dibao Household/Older

|       | Freq.  | %      |
|-------|--------|--------|
| 0 No  | 10,332 | 90.96  |
| 2 Yes | 1,027  | 9.04   |
| Total | 11,359 | 100.00 |

### ge001\_s3: Tekun Household/Older

|       | Freq.  | %      |
|-------|--------|--------|
| 0 No  | 11,293 | 99.42  |
| 3 Yes | 66     | 0.58   |
| Total | 11,359 | 100.00 |

### ge001\_s4: Jiandanglika Poor Household

|       | Freq.  | %      |
|-------|--------|--------|
| 0 No  | 10,577 | 93.12  |
| 4 Yes | 782    | 6.88   |
| Total | 11,359 | 100.00 |

### ge001\_s5: Other Poor Household

|       | Freq.  | %      |
|-------|--------|--------|
| 0 No  | 11,253 | 99.07  |
| 5 Yes | 106    | 0.93   |
| Total | 11,359 | 100.00 |

## ge001\_s6: None of Above

|       | Freq.  | %      |
|-------|--------|--------|
| 0 No  | 1,830  | 16.11  |
| 6 Yes | 9,529  | 83.89  |
| Total | 11,359 | 100.00 |

## ge002\_1\_: Now/Used to be Wubao

|              | Freq. | %      |
|--------------|-------|--------|
| 1 Now        | 119   | 92.97  |
| 2 Used to be | 9     | 7.03   |
| Total        | 128   | 100.00 |

## ge002\_2\_: Now/Used to be Dibao

|              | Freq. | %      |
|--------------|-------|--------|
| 1 Now        | 818   | 79.65  |
| 2 Used to be | 209   | 20.35  |
| Total        | 1,027 | 100.00 |

## ge002\_3\_: Now/Used to be Tekun

|              | Freq. | %      |
|--------------|-------|--------|
| 1 Now        | 54    | 81.82  |
| 2 Used to be | 12    | 18.18  |
| Total        | 66    | 100.00 |

## ge002\_4\_: Now/Used to be Jiandanglika Poor Household

|              | Freq. | %      |
|--------------|-------|--------|
| 1 Now        | 591   | 75.58  |
| 2 Used to be | 191   | 24.42  |
| Total        | 782   | 100.00 |

## ge002\_5\_: Now/Used to be Other Poor Household

|              | Freq. | %      |
|--------------|-------|--------|
| 1 Now        | 85    | 80.19  |
| 2 Used to be | 21    | 19.81  |
| Total        | 106   | 100.00 |

## ge002\_1\_1\_: Begin Time

| Mean     | SD   | Min      | Max      | Obs |
|----------|------|----------|----------|-----|
| 2,011.91 | 7.14 | 1,981.00 | 2,020.00 | 119 |

#### ge002\_1\_2\_: Begin Time

| Mean     | SD   | Min      | Max      | Obs |
|----------|------|----------|----------|-----|
| 2,014.36 | 5.38 | 1,985.00 | 2,020.00 | 818 |

#### ge002\_1\_3\_: Begin Time

| Mean     | SD   | Min      | Max      | Obs |
|----------|------|----------|----------|-----|
| 2,013.59 | 6.35 | 1,990.00 | 2,020.00 | 54  |

#### ge002\_1\_4\_: Begin Time

| Mean     | SD   | Min      | Max      | Obs |
|----------|------|----------|----------|-----|
| 2,015.50 | 3.73 | 1,981.00 | 2,020.00 | 591 |

#### ge002\_1\_5\_: Begin Time

| Mean     | SD   | Min      | Max      | Obs |
|----------|------|----------|----------|-----|
| 2,015.54 | 3.90 | 2,000.00 | 2,020.00 | 85  |

#### ge002\_2\_1\_: Begin Time

| Mean     | SD    | Min      | Max      | Obs |
|----------|-------|----------|----------|-----|
| 2,007.78 | 10.64 | 1,985.00 | 2,017.00 | 9   |

#### ge002\_2\_2\_: Begin Time

| Mean     | SD   | Min      | Max      | Obs |
|----------|------|----------|----------|-----|
| 2,010.32 | 6.17 | 1,988.00 | 2,019.00 | 209 |

#### ge002\_2\_3\_: Begin Time

| Mean     | SD   | Min      | Max      | Obs |
|----------|------|----------|----------|-----|
| 2,013.33 | 5.26 | 2,000.00 | 2,018.00 | 12  |

#### ge002\_2\_4\_: Begin Time

| Mean     | SD   | Min      | Max      | Obs |
|----------|------|----------|----------|-----|
| 2,014.68 | 3.17 | 1,993.00 | 2,020.00 | 191 |

#### ge002\_2\_5\_: Begin Time

| Mean     | SD   | Min      | Max      | Obs |
|----------|------|----------|----------|-----|
| 2,011.67 | 7.15 | 1,999.00 | 2,019.00 | 21  |

**ge015\_1\_:** End Time

| Mean     | SD   | Min      | Max      | Obs |
|----------|------|----------|----------|-----|
| 2,015.11 | 6.51 | 1,998.00 | 2,018.00 | 9   |

**ge015\_2\_:** End Time

| Mean     | SD   | Min      | Max      | Obs |
|----------|------|----------|----------|-----|
| 2,015.47 | 4.59 | 1,995.00 | 2,020.00 | 209 |

**ge015\_3\_:** End Time

| Mean     | SD   | Min      | Max      | Obs |
|----------|------|----------|----------|-----|
| 2,017.83 | 1.75 | 2,014.00 | 2,019.00 | 12  |

**ge015\_4\_:** End Time

| Mean     | SD   | Min      | Max      | Obs |
|----------|------|----------|----------|-----|
| 2,017.87 | 2.63 | 1,995.00 | 2,020.00 | 191 |

**ge015\_5\_:** End Time

| Mean     | SD   | Min      | Max      | Obs |
|----------|------|----------|----------|-----|
| 2,014.62 | 7.38 | 2,000.00 | 2,020.00 | 21  |

**ge003\_1\_\_s1:** HHMemberName[1] Receive Wubao Subsidies

|       | Freq. | %      |
|-------|-------|--------|
| 0 No  | 98    | 82.35  |
| 1 Yes | 21    | 17.65  |
| Total | 119   | 100.00 |

**ge003\_1\_\_s2:** HHMemberName[2] Receive Wubao Subsidies

|       | Freq. | %      |
|-------|-------|--------|
| 0 No  | 109   | 91.60  |
| 2 Yes | 10    | 8.40   |
| Total | 119   | 100.00 |

**ge003\_1\_\_s3:** HHMemberName[3] Receive Wubao Subsidies

|  | Freq. | % |
|--|-------|---|
|--|-------|---|

|       |     |        |
|-------|-----|--------|
| 0 No  | 118 | 99.16  |
| 3 Yes | 1   | 0.84   |
| Total | 119 | 100.00 |

**ge003\_1\_\_s4: HHMemberName[4] Receive Wubao Subsidies**

|       | Freq. | %      |
|-------|-------|--------|
| 0 No  | 118   | 99.16  |
| 4 Yes | 1     | 0.84   |
| Total | 119   | 100.00 |

**ge003\_1\_\_s5: HHMemberName[5] Receive Wubao Subsidies**

|       | Freq. | %      |
|-------|-------|--------|
| 0 No  | 119   | 100.00 |
| Total | 119   | 100.00 |

**ge003\_1\_\_s6: HHMemberName[6] Receive Wubao Subsidies**

|       | Freq. | %      |
|-------|-------|--------|
| 0 No  | 119   | 100.00 |
| Total | 119   | 100.00 |

**ge003\_1\_\_s7: HHMemberName[7] Receive Wubao Subsidies**

|       | Freq. | %      |
|-------|-------|--------|
| 0 No  | 119   | 100.00 |
| Total | 119   | 100.00 |

**ge003\_1\_\_s8: HHMemberName[8] Receive Wubao Subsidies**

|       | Freq. | %      |
|-------|-------|--------|
| 0 No  | 119   | 100.00 |
| Total | 119   | 100.00 |

**ge003\_1\_\_s9: HHMemberName[9] Receive Wubao Subsidies**

|       | Freq. | %      |
|-------|-------|--------|
| 0 No  | 119   | 100.00 |
| Total | 119   | 100.00 |

**ge003\_1\_\_s10: HHMemberName[10] Receive Wubao Subsidies**

|       | Freq. | %      |
|-------|-------|--------|
| 0 No  | 119   | 100.00 |
| Total | 119   | 100.00 |

**ge003\_1\_\_s11: HHMemberName[11] Receive Wubao Subsidies**

|       | Freq. | %      |
|-------|-------|--------|
| 0 No  | 119   | 100.00 |
| Total | 119   | 100.00 |

ge003\_1\_\_s12: HHMemberName[12] Receive Wubao Subsidies

|       | Freq. | %      |
|-------|-------|--------|
| 0 No  | 119   | 100.00 |
| Total | 119   | 100.00 |

ge003\_1\_\_s13: HHMemberName[13] Receive Wubao Subsidies

|       | Freq. | %      |
|-------|-------|--------|
| 0 No  | 119   | 100.00 |
| Total | 119   | 100.00 |

ge003\_1\_\_s14: HHMemberName[14] Receive Wubao Subsidies

|       | Freq. | %      |
|-------|-------|--------|
| 0 No  | 119   | 100.00 |
| Total | 119   | 100.00 |

ge003\_1\_\_s15: HHMemberName[15] Receive Wubao Subsidies

|       | Freq. | %      |
|-------|-------|--------|
| 0 No  | 119   | 100.00 |
| Total | 119   | 100.00 |

ge003\_1\_\_s16: HHMemberName[16] Receive Wubao Subsidies

|       | Freq. | %      |
|-------|-------|--------|
| 0 No  | 119   | 100.00 |
| Total | 119   | 100.00 |

ge003\_1\_\_s17: HHMemberName[17] Receive Wubao Subsidies

|       | Freq. | %      |
|-------|-------|--------|
| 0 No  | 119   | 100.00 |
| Total | 119   | 100.00 |

ge003\_1\_\_s18: HHMemberName[18] Receive Wubao Subsidies

|       | Freq. | %      |
|-------|-------|--------|
| 0 No  | 119   | 100.00 |
| Total | 119   | 100.00 |

**ge003\_1\_\_s19: HHMemberName[19] Receive Wubao Subsidies**

|       | Freq. | %      |
|-------|-------|--------|
| 0 No  | 119   | 100.00 |
| Total | 119   | 100.00 |

**ge003\_1\_\_s20: HHMemberName[20] Receive Wubao Subsidies**

|       | Freq. | %      |
|-------|-------|--------|
| 0 No  | 119   | 100.00 |
| Total | 119   | 100.00 |

**ge003\_1\_\_s21: HHMemberName[21] Receive Wubao Subsidies**

|       | Freq. | %      |
|-------|-------|--------|
| 0 No  | 119   | 100.00 |
| Total | 119   | 100.00 |

**ge003\_1\_\_s22: HHMemberName[22] Receive Wubao Subsidies**

|       | Freq. | %      |
|-------|-------|--------|
| 0 No  | 119   | 100.00 |
| Total | 119   | 100.00 |

**ge003\_1\_\_s23: HHMemberName[23] Receive Wubao Subsidies**

|       | Freq. | %      |
|-------|-------|--------|
| 0 No  | 119   | 100.00 |
| Total | 119   | 100.00 |

**ge003\_1\_\_s24: HHMemberName[24] Receive Wubao Subsidies**

|       | Freq. | %      |
|-------|-------|--------|
| 0 No  | 119   | 100.00 |
| Total | 119   | 100.00 |

**ge003\_1\_\_s25: HHMemberName[25] Receive Wubao Subsidies**

|       | Freq. | %      |
|-------|-------|--------|
| 0 No  | 119   | 100.00 |
| Total | 119   | 100.00 |

**ge003\_1\_\_s26: Main Respondent Receive Wubao Subsidies**

|        | Freq. | %     |
|--------|-------|-------|
| 0 No   | 34    | 28.57 |
| 26 Yes | 85    | 71.43 |



|       |     |        |
|-------|-----|--------|
| Total | 119 | 100.00 |
|-------|-----|--------|

**ge003\_1\_\_s27: Main Respondent's Spouse Receive Wubao Subsidies**

|        | Freq. | %      |
|--------|-------|--------|
| 0 No   | 115   | 96.64  |
| 27 Yes | 4     | 3.36   |
| Total  | 119   | 100.00 |

**ge003\_2\_\_s1: HHMemberName[1] Receive Dibao Subsidies**

|       | Freq. | %      |
|-------|-------|--------|
| 0 No  | 642   | 76.61  |
| 1 Yes | 196   | 23.39  |
| Total | 838   | 100.00 |

**ge003\_2\_\_s2: HHMemberName[2] Receive Dibao Subsidies**

|       | Freq. | %      |
|-------|-------|--------|
| 0 No  | 770   | 91.89  |
| 2 Yes | 68    | 8.11   |
| Total | 838   | 100.00 |

**ge003\_2\_\_s3: HHMemberName[3] Receive Dibao Subsidies**

|       | Freq. | %      |
|-------|-------|--------|
| 0 No  | 806   | 96.18  |
| 3 Yes | 32    | 3.82   |
| Total | 838   | 100.00 |

**ge003\_2\_\_s4: HHMemberName[4] Receive Dibao Subsidies**

|       | Freq. | %      |
|-------|-------|--------|
| 0 No  | 826   | 98.57  |
| 4 Yes | 12    | 1.43   |
| Total | 838   | 100.00 |

**ge003\_2\_\_s5: HHMemberName[5] Receive Dibao Subsidies**

|       | Freq. | %      |
|-------|-------|--------|
| 0 No  | 837   | 99.88  |
| 5 Yes | 1     | 0.12   |
| Total | 838   | 100.00 |

**ge003\_2\_\_s6: HHMemberName[6] Receive Dibao Subsidies**

|      | Freq. | %     |
|------|-------|-------|
| 0 No | 837   | 99.88 |

|       |     |        |
|-------|-----|--------|
| 6 Yes | 1   | 0.12   |
| Total | 838 | 100.00 |

**ge003\_2\_\_s7: HHMemberName[7] Receive Dibao Subsidies**

|       | Freq. | %      |
|-------|-------|--------|
| 0 No  | 838   | 100.00 |
| Total | 838   | 100.00 |

**ge003\_2\_\_s8: HHMemberName[8] Receive Dibao Subsidies**

|       | Freq. | %      |
|-------|-------|--------|
| 0 No  | 838   | 100.00 |
| Total | 838   | 100.00 |

**ge003\_2\_\_s9: HHMemberName[9] Receive Dibao Subsidies**

|       | Freq. | %      |
|-------|-------|--------|
| 0 No  | 838   | 100.00 |
| Total | 838   | 100.00 |

**ge003\_2\_\_s10: HHMemberName[10] Receive Dibao Subsidies**

|       | Freq. | %      |
|-------|-------|--------|
| 0 No  | 838   | 100.00 |
| Total | 838   | 100.00 |

**ge003\_2\_\_s11: HHMemberName[11] Receive Dibao Subsidies**

|       | Freq. | %      |
|-------|-------|--------|
| 0 No  | 838   | 100.00 |
| Total | 838   | 100.00 |

**ge003\_2\_\_s12: HHMemberName[12] Receive Dibao Subsidies**

|       | Freq. | %      |
|-------|-------|--------|
| 0 No  | 838   | 100.00 |
| Total | 838   | 100.00 |

**ge003\_2\_\_s13: HHMemberName[13] Receive Dibao Subsidies**

|       | Freq. | %      |
|-------|-------|--------|
| 0 No  | 838   | 100.00 |
| Total | 838   | 100.00 |

**ge003\_2\_\_s14: HHMemberName[14] Receive Dibao Subsidies**

|       | Freq. | %      |
|-------|-------|--------|
| 0 No  | 838   | 100.00 |
| Total | 838   | 100.00 |

ge003\_2\_\_s15: HHMemberName[15] Receive Dibao Subsidies

|       | Freq. | %      |
|-------|-------|--------|
| 0 No  | 838   | 100.00 |
| Total | 838   | 100.00 |

ge003\_2\_\_s16: HHMemberName[16] Receive Dibao Subsidies

|       | Freq. | %      |
|-------|-------|--------|
| 0 No  | 838   | 100.00 |
| Total | 838   | 100.00 |

ge003\_2\_\_s17: HHMemberName[17] Receive Dibao Subsidies

|       | Freq. | %      |
|-------|-------|--------|
| 0 No  | 838   | 100.00 |
| Total | 838   | 100.00 |

ge003\_2\_\_s18: HHMemberName[18] Receive Dibao Subsidies

|       | Freq. | %      |
|-------|-------|--------|
| 0 No  | 838   | 100.00 |
| Total | 838   | 100.00 |

ge003\_2\_\_s19: HHMemberName[19] Receive Dibao Subsidies

|       | Freq. | %      |
|-------|-------|--------|
| 0 No  | 838   | 100.00 |
| Total | 838   | 100.00 |

ge003\_2\_\_s20: HHMemberName[20] Receive Dibao Subsidies

|       | Freq. | %      |
|-------|-------|--------|
| 0 No  | 838   | 100.00 |
| Total | 838   | 100.00 |

ge003\_2\_\_s21: HHMemberName[21] Receive Dibao Subsidies

|       | Freq. | %      |
|-------|-------|--------|
| 0 No  | 838   | 100.00 |
| Total | 838   | 100.00 |

**ge003\_2\_\_s22: HHMemberName[22] Receive Dibao Subsidies**

|       | Freq. | %      |
|-------|-------|--------|
| 0 No  | 838   | 100.00 |
| Total | 838   | 100.00 |

**ge003\_2\_\_s23: HHMemberName[23] Receive Dibao Subsidies**

|       | Freq. | %      |
|-------|-------|--------|
| 0 No  | 838   | 100.00 |
| Total | 838   | 100.00 |

**ge003\_2\_\_s24: HHMemberName[24] Receive Dibao Subsidies**

|       | Freq. | %      |
|-------|-------|--------|
| 0 No  | 838   | 100.00 |
| Total | 838   | 100.00 |

**ge003\_2\_\_s25: HHMemberName[25] Receive Dibao Subsidies**

|       | Freq. | %      |
|-------|-------|--------|
| 0 No  | 838   | 100.00 |
| Total | 838   | 100.00 |

**ge003\_2\_\_s26: Main Respondent Receive Dibao Subsidies**

|        | Freq. | %      |
|--------|-------|--------|
| 0 No   | 264   | 31.50  |
| 26 Yes | 574   | 68.50  |
| Total  | 838   | 100.00 |

**ge003\_2\_\_s27: Main Respondent's Spouse Receive Dibao Subsidies**

|        | Freq. | %      |
|--------|-------|--------|
| 0 No   | 548   | 65.39  |
| 27 Yes | 290   | 34.61  |
| Total  | 838   | 100.00 |

**ge003\_3\_\_s1: HHMemberName[1] Receive Tekun Subsidies**

|       | Freq. | %      |
|-------|-------|--------|
| 0 No  | 40    | 74.07  |
| 1 Yes | 14    | 25.93  |
| Total | 54    | 100.00 |

**ge003\_3\_\_s2: HHMemberName[2] Receive Tekun Subsidies**

|       | Freq. | %      |
|-------|-------|--------|
| 0 No  | 48    | 88.89  |
| 2 Yes | 6     | 11.11  |
| Total | 54    | 100.00 |

ge003\_3\_\_s3: HHMemberName[3] Receive Tekun Subsidies

|       | Freq. | %      |
|-------|-------|--------|
| 0 No  | 52    | 96.30  |
| 3 Yes | 2     | 3.70   |
| Total | 54    | 100.00 |

ge003\_3\_\_s4: HHMemberName[4] Receive Tekun Subsidies

|       | Freq. | %      |
|-------|-------|--------|
| 0 No  | 53    | 98.15  |
| 4 Yes | 1     | 1.85   |
| Total | 54    | 100.00 |

ge003\_3\_\_s5: HHMemberName[5] Receive Tekun Subsidies

|       | Freq. | %      |
|-------|-------|--------|
| 0 No  | 54    | 100.00 |
| Total | 54    | 100.00 |

ge003\_3\_\_s6: HHMemberName[6] Receive Tekun Subsidies

|       | Freq. | %      |
|-------|-------|--------|
| 0 No  | 54    | 100.00 |
| Total | 54    | 100.00 |

ge003\_3\_\_s7: HHMemberName[7] Receive Tekun Subsidies

|       | Freq. | %      |
|-------|-------|--------|
| 0 No  | 54    | 100.00 |
| Total | 54    | 100.00 |

ge003\_3\_\_s8: HHMemberName[8] Receive Tekun Subsidies

|       | Freq. | %      |
|-------|-------|--------|
| 0 No  | 54    | 100.00 |
| Total | 54    | 100.00 |

ge003\_3\_\_s9: HHMemberName[9] Receive Tekun Subsidies

|      | Freq. | %      |
|------|-------|--------|
| 0 No | 54    | 100.00 |

|       |    |        |
|-------|----|--------|
| Total | 54 | 100.00 |
|-------|----|--------|

ge003\_3\_\_s10: HHMemberName[10] Receive Tekun Subsidies

|       | Freq. | %      |
|-------|-------|--------|
| 0 No  | 54    | 100.00 |
| Total | 54    | 100.00 |

ge003\_3\_\_s11: HHMemberName[11] Receive Tekun Subsidies

|       | Freq. | %      |
|-------|-------|--------|
| 0 No  | 54    | 100.00 |
| Total | 54    | 100.00 |

ge003\_3\_\_s12: HHMemberName[12] Receive Tekun Subsidies

|       | Freq. | %      |
|-------|-------|--------|
| 0 No  | 54    | 100.00 |
| Total | 54    | 100.00 |

ge003\_3\_\_s13: HHMemberName[13] Receive Tekun Subsidies

|       | Freq. | %      |
|-------|-------|--------|
| 0 No  | 54    | 100.00 |
| Total | 54    | 100.00 |

ge003\_3\_\_s14: HHMemberName[14] Receive Tekun Subsidies

|       | Freq. | %      |
|-------|-------|--------|
| 0 No  | 54    | 100.00 |
| Total | 54    | 100.00 |

ge003\_3\_\_s15: HHMemberName[15] Receive Tekun Subsidies

|       | Freq. | %      |
|-------|-------|--------|
| 0 No  | 54    | 100.00 |
| Total | 54    | 100.00 |

ge003\_3\_\_s16: HHMemberName[16] Receive Tekun Subsidies

|       | Freq. | %      |
|-------|-------|--------|
| 0 No  | 54    | 100.00 |
| Total | 54    | 100.00 |

ge003\_3\_\_s17: HHMemberName[17] Receive Tekun Subsidies

|  | Freq. | % |
|--|-------|---|
|--|-------|---|

|       |    |        |
|-------|----|--------|
| 0 No  | 54 | 100.00 |
| Total | 54 | 100.00 |

**ge003\_3\_\_s18: HHMemberName[18] Receive Tekun Subsidies**

|       | Freq. | %      |
|-------|-------|--------|
| 0 No  | 54    | 100.00 |
| Total | 54    | 100.00 |

**ge003\_3\_\_s19: HHMemberName[19] Receive Tekun Subsidies**

|       | Freq. | %      |
|-------|-------|--------|
| 0 No  | 54    | 100.00 |
| Total | 54    | 100.00 |

**ge003\_3\_\_s20: HHMemberName[20] Receive Tekun Subsidies**

|       | Freq. | %      |
|-------|-------|--------|
| 0 No  | 54    | 100.00 |
| Total | 54    | 100.00 |

**ge003\_3\_\_s21: HHMemberName[21] Receive Tekun Subsidies**

|       | Freq. | %      |
|-------|-------|--------|
| 0 No  | 54    | 100.00 |
| Total | 54    | 100.00 |

**ge003\_3\_\_s22: HHMemberName[22] Receive Tekun Subsidies**

|       | Freq. | %      |
|-------|-------|--------|
| 0 No  | 54    | 100.00 |
| Total | 54    | 100.00 |

**ge003\_3\_\_s23: HHMemberName[23] Receive Tekun Subsidies**

|       | Freq. | %      |
|-------|-------|--------|
| 0 No  | 54    | 100.00 |
| Total | 54    | 100.00 |

**ge003\_3\_\_s24: HHMemberName[24] Receive Tekun Subsidies**

|       | Freq. | %      |
|-------|-------|--------|
| 0 No  | 54    | 100.00 |
| Total | 54    | 100.00 |

**ge003\_3\_\_s25: HHMemberName[25] Receive Tekun Subsidies**

|       | Freq. | %      |
|-------|-------|--------|
| 0 No  | 54    | 100.00 |
| Total | 54    | 100.00 |

**ge003\_3\_\_s26: Main Respondent Receive Tekun Subsidies**

|        | Freq. | %      |
|--------|-------|--------|
| 0 No   | 12    | 22.22  |
| 26 Yes | 42    | 77.78  |
| Total  | 54    | 100.00 |

**ge003\_3\_\_s27: Main Respondent's Spouse Receive Tekun Subsidies**

|        | Freq. | %      |
|--------|-------|--------|
| 0 No   | 33    | 61.11  |
| 27 Yes | 21    | 38.89  |
| Total  | 54    | 100.00 |

**ge003\_4\_\_s1: HHMemberName[1] Receive Jiandanglika Subsidies**

|       | Freq. | %      |
|-------|-------|--------|
| 0 No  | 434   | 68.03  |
| 1 Yes | 204   | 31.97  |
| Total | 638   | 100.00 |

**ge003\_4\_\_s2: HHMemberName[2] Receive Jiandanglika Subsidies**

|       | Freq. | %      |
|-------|-------|--------|
| 0 No  | 530   | 83.07  |
| 2 Yes | 108   | 16.93  |
| Total | 638   | 100.00 |

**ge003\_4\_\_s3: HHMemberName[3] Receive Jiandanglika Subsidies**

|       | Freq. | %      |
|-------|-------|--------|
| 0 No  | 574   | 89.97  |
| 3 Yes | 64    | 10.03  |
| Total | 638   | 100.00 |

**ge003\_4\_\_s4: HHMemberName[4] Receive Jiandanglika Subsidies**

|       | Freq. | %      |
|-------|-------|--------|
| 0 No  | 604   | 94.67  |
| 4 Yes | 34    | 5.33   |
| Total | 638   | 100.00 |

**ge003\_4\_\_s5: HHMemberName[5] Receive Jiandanglika Subsidies**



|       | Freq. | %      |
|-------|-------|--------|
| 0 No  | 630   | 98.75  |
| 5 Yes | 8     | 1.25   |
| Total | 638   | 100.00 |

**ge003\_4\_\_s6: HHMemberName[6] Receive Jiandanglika Subsidies**

|       | Freq. | %      |
|-------|-------|--------|
| 0 No  | 635   | 99.53  |
| 6 Yes | 3     | 0.47   |
| Total | 638   | 100.00 |

**ge003\_4\_\_s7: HHMemberName[7] Receive Jiandanglika Subsidies**

|       | Freq. | %      |
|-------|-------|--------|
| 0 No  | 636   | 99.69  |
| 7 Yes | 2     | 0.31   |
| Total | 638   | 100.00 |

**ge003\_4\_\_s8: HHMemberName[8] Receive Jiandanglika Subsidies**

|       | Freq. | %      |
|-------|-------|--------|
| 0 No  | 637   | 99.84  |
| 8 Yes | 1     | 0.16   |
| Total | 638   | 100.00 |

**ge003\_4\_\_s9: HHMemberName[9] Receive Jiandanglika Subsidies**

|       | Freq. | %      |
|-------|-------|--------|
| 0 No  | 638   | 100.00 |
| Total | 638   | 100.00 |

**ge003\_4\_\_s10: HHMemberName[10] Receive Jiandanglika Subsidies**

|       | Freq. | %      |
|-------|-------|--------|
| 0 No  | 638   | 100.00 |
| Total | 638   | 100.00 |

**ge003\_4\_\_s11: HHMemberName[11] Receive Jiandanglika Subsidies**

|       | Freq. | %      |
|-------|-------|--------|
| 0 No  | 638   | 100.00 |
| Total | 638   | 100.00 |

**ge003\_4\_\_s12: HHMemberName[12] Receive Jiandanglika Subsidies**

|  | Freq. | % |
|--|-------|---|
|--|-------|---|

|       |     |        |
|-------|-----|--------|
| 0 No  | 638 | 100.00 |
| Total | 638 | 100.00 |

**ge003\_4\_\_s13: HHMemberName[13] Receive Jiandanglika Subsidies**

|       | Freq. | %      |
|-------|-------|--------|
| 0 No  | 638   | 100.00 |
| Total | 638   | 100.00 |

**ge003\_4\_\_s14: HHMemberName[14] Receive Jiandanglika Subsidies**

|       | Freq. | %      |
|-------|-------|--------|
| 0 No  | 638   | 100.00 |
| Total | 638   | 100.00 |

**ge003\_4\_\_s15: HHMemberName[15] Receive Jiandanglika Subsidies**

|       | Freq. | %      |
|-------|-------|--------|
| 0 No  | 638   | 100.00 |
| Total | 638   | 100.00 |

**ge003\_4\_\_s16: HHMemberName[16] Receive Jiandanglika Subsidies**

|       | Freq. | %      |
|-------|-------|--------|
| 0 No  | 638   | 100.00 |
| Total | 638   | 100.00 |

**ge003\_4\_\_s17: HHMemberName[17] Receive Jiandanglika Subsidies**

|       | Freq. | %      |
|-------|-------|--------|
| 0 No  | 638   | 100.00 |
| Total | 638   | 100.00 |

**ge003\_4\_\_s18: HHMemberName[18] Receive Jiandanglika Subsidies**

|       | Freq. | %      |
|-------|-------|--------|
| 0 No  | 638   | 100.00 |
| Total | 638   | 100.00 |

**ge003\_4\_\_s19: HHMemberName[19] Receive Jiandanglika Subsidies**

|       | Freq. | %      |
|-------|-------|--------|
| 0 No  | 638   | 100.00 |
| Total | 638   | 100.00 |

**ge003\_4\_\_s20: HHMemberName[20] Receive Jiandanglika Subsidies**

|       | Freq. | %      |
|-------|-------|--------|
| 0 No  | 638   | 100.00 |
| Total | 638   | 100.00 |

**ge003\_4\_\_s21: HHMemberName[21] Receive Jiandanglika Subsidies**

|       | Freq. | %      |
|-------|-------|--------|
| 0 No  | 638   | 100.00 |
| Total | 638   | 100.00 |

**ge003\_4\_\_s22: HHMemberName[22] Receive Jiandanglika Subsidies**

|       | Freq. | %      |
|-------|-------|--------|
| 0 No  | 638   | 100.00 |
| Total | 638   | 100.00 |

**ge003\_4\_\_s23: HHMemberName[23] Receive Jiandanglika Subsidies**

|       | Freq. | %      |
|-------|-------|--------|
| 0 No  | 638   | 100.00 |
| Total | 638   | 100.00 |

**ge003\_4\_\_s24: HHMemberName[24] Receive Jiandanglika Subsidies**

|       | Freq. | %      |
|-------|-------|--------|
| 0 No  | 638   | 100.00 |
| Total | 638   | 100.00 |

**ge003\_4\_\_s25: HHMemberName[25] Receive Jiandanglika Subsidies**

|       | Freq. | %      |
|-------|-------|--------|
| 0 No  | 638   | 100.00 |
| Total | 638   | 100.00 |

**ge003\_4\_\_s26: Main Respondent Receive Jiandanglika Subsidies**

|        | Freq. | %      |
|--------|-------|--------|
| 0 No   | 102   | 15.99  |
| 26 Yes | 536   | 84.01  |
| Total  | 638   | 100.00 |

**ge003\_4\_\_s27: Main Respondent's Spouse Receive Jiandanglika Subsidies**

|        | Freq. | %      |
|--------|-------|--------|
| 0 No   | 324   | 50.78  |
| 27 Yes | 314   | 49.22  |
| Total  | 638   | 100.00 |

**ge003\_5\_\_s1: HHMemberName[1] Receive other Poor Household Subsidies**

|       | Freq. | %      |
|-------|-------|--------|
| 0 No  | 70    | 78.65  |
| 1 Yes | 19    | 21.35  |
| Total | 89    | 100.00 |

**ge003\_5\_\_s2: HHMemberName[2] Receive other Poor Household Subsidies**

|       | Freq. | %      |
|-------|-------|--------|
| 0 No  | 82    | 92.13  |
| 2 Yes | 7     | 7.87   |
| Total | 89    | 100.00 |

**ge003\_5\_\_s3: HHMemberName[3] Receive other Poor Household Subsidies**

|       | Freq. | %      |
|-------|-------|--------|
| 0 No  | 88    | 98.88  |
| 3 Yes | 1     | 1.12   |
| Total | 89    | 100.00 |

**ge003\_5\_\_s4: HHMemberName[4] Receive other Poor Household Subsidies**

|       | Freq. | %      |
|-------|-------|--------|
| 0 No  | 88    | 98.88  |
| 4 Yes | 1     | 1.12   |
| Total | 89    | 100.00 |

**ge003\_5\_\_s5: HHMemberName[5] Receive other Poor Household Subsidies**

|       | Freq. | %      |
|-------|-------|--------|
| 0 No  | 88    | 98.88  |
| 5 Yes | 1     | 1.12   |
| Total | 89    | 100.00 |

**ge003\_5\_\_s6: HHMemberName[6] Receive other Poor Household Subsidies**

|       | Freq. | %      |
|-------|-------|--------|
| 0 No  | 89    | 100.00 |
| Total | 89    | 100.00 |

**ge003\_5\_\_s7: HHMemberName[7] Receive other Poor Household Subsidies**

|       | Freq. | %      |
|-------|-------|--------|
| 0 No  | 89    | 100.00 |
| Total | 89    | 100.00 |

**ge003\_5\_\_s8: HHMemberName[8] Receive other Poor Household Subsidies**

|       | Freq. | %      |
|-------|-------|--------|
| 0 No  | 89    | 100.00 |
| Total | 89    | 100.00 |

ge003\_5\_\_s9: HHMemberName[9] Receive other Poor Household Subsidies

|       | Freq. | %      |
|-------|-------|--------|
| 0 No  | 89    | 100.00 |
| Total | 89    | 100.00 |

ge003\_5\_\_s10: HHMemberName[10] Receive other Poor Household Subsidies

|       | Freq. | %      |
|-------|-------|--------|
| 0 No  | 89    | 100.00 |
| Total | 89    | 100.00 |

ge003\_5\_\_s11: HHMemberName[11] Receive other Poor Household Subsidies

|       | Freq. | %      |
|-------|-------|--------|
| 0 No  | 89    | 100.00 |
| Total | 89    | 100.00 |

ge003\_5\_\_s12: HHMemberName[12] Receive other Poor Household Subsidies

|       | Freq. | %      |
|-------|-------|--------|
| 0 No  | 89    | 100.00 |
| Total | 89    | 100.00 |

ge003\_5\_\_s13: HHMemberName[13] Receive other Poor Household Subsidies

|       | Freq. | %      |
|-------|-------|--------|
| 0 No  | 89    | 100.00 |
| Total | 89    | 100.00 |

ge003\_5\_\_s14: HHMemberName[14] Receive other Poor Household Subsidies

|       | Freq. | %      |
|-------|-------|--------|
| 0 No  | 89    | 100.00 |
| Total | 89    | 100.00 |

ge003\_5\_\_s15: HHMemberName[15] Receive other Poor Household Subsidies

|       | Freq. | %      |
|-------|-------|--------|
| 0 No  | 89    | 100.00 |
| Total | 89    | 100.00 |

**ge003\_5\_\_s16:** HHMemberName[16] Receive other Poor Household Subsidies

|       | Freq. | %      |
|-------|-------|--------|
| 0 No  | 89    | 100.00 |
| Total | 89    | 100.00 |

**ge003\_5\_\_s17:** HHMemberName[17] Receive other Poor Household Subsidies

|       | Freq. | %      |
|-------|-------|--------|
| 0 No  | 89    | 100.00 |
| Total | 89    | 100.00 |

**ge003\_5\_\_s18:** HHMemberName[18] Receive other Poor Household Subsidies

|       | Freq. | %      |
|-------|-------|--------|
| 0 No  | 89    | 100.00 |
| Total | 89    | 100.00 |

**ge003\_5\_\_s19:** HHMemberName[19] Receive other Poor Household Subsidies

|       | Freq. | %      |
|-------|-------|--------|
| 0 No  | 89    | 100.00 |
| Total | 89    | 100.00 |

**ge003\_5\_\_s20:** HHMemberName[20] Receive other Poor Household Subsidies

|       | Freq. | %      |
|-------|-------|--------|
| 0 No  | 89    | 100.00 |
| Total | 89    | 100.00 |

**ge003\_5\_\_s21:** HHMemberName[21] Receive other Poor Household Subsidies

|       | Freq. | %      |
|-------|-------|--------|
| 0 No  | 89    | 100.00 |
| Total | 89    | 100.00 |

**ge003\_5\_\_s22:** HHMemberName[22] Receive other Poor Household Subsidies

|       | Freq. | %      |
|-------|-------|--------|
| 0 No  | 89    | 100.00 |
| Total | 89    | 100.00 |

**ge003\_5\_\_s23:** HHMemberName[23] Receive other Poor Household Subsidies

|       | Freq. | %      |
|-------|-------|--------|
| 0 No  | 89    | 100.00 |
| Total | 89    | 100.00 |

**ge003\_5\_\_s24: HHMemberName[24] Receive other Poor Household Subsidies**

|       | Freq. | %      |
|-------|-------|--------|
| 0 No  | 89    | 100.00 |
| Total | 89    | 100.00 |

**ge003\_5\_\_s25: HHMemberName[25] Receive other Poor Household Subsidies**

|       | Freq. | %      |
|-------|-------|--------|
| 0 No  | 89    | 100.00 |
| Total | 89    | 100.00 |

**ge003\_5\_\_s26: Main Respondent Receive other Poor Household Subsidies**

|        | Freq. | %      |
|--------|-------|--------|
| 0 No   | 18    | 20.22  |
| 26 Yes | 71    | 79.78  |
| Total  | 89    | 100.00 |

**ge003\_5\_\_s27: Main Respondent's Spouse Receive other Poor Household Subsidies**

|        | Freq. | %      |
|--------|-------|--------|
| 0 No   | 47    | 52.81  |
| 27 Yes | 42    | 47.19  |
| Total  | 89    | 100.00 |

**ge004\_1\_: Amount of Wubao Subsidies**

| Mean     | SD       | Min   | Max       | Obs |
|----------|----------|-------|-----------|-----|
| 5,374.67 | 3,762.12 | -1.00 | 22,000.00 | 119 |

**ge004\_2\_: Amount of Dibao Subsidies**

| Mean     | SD       | Min   | Max       | Obs |
|----------|----------|-------|-----------|-----|
| 3,907.70 | 5,479.79 | -1.00 | 90,000.00 | 838 |

**ge004\_3\_: Amount of Tekun Subsidies**

| Mean     | SD       | Min   | Max       | Obs |
|----------|----------|-------|-----------|-----|
| 2,837.85 | 4,617.13 | -1.00 | 22,000.00 | 54  |

**ge004\_4\_: Amount of Jiandanglika Subsidies**

| Mean     | SD       | Min   | Max        | Obs |
|----------|----------|-------|------------|-----|
| 3,173.79 | 9,307.10 | -1.00 | 125,000.00 | 638 |

**ge004\_5\_**: Amount of other Poor Household Subsidies

| Mean     | SD        | Min   | Max       | Obs |
|----------|-----------|-------|-----------|-----|
| 4,364.85 | 13,052.07 | -1.00 | 80,400.00 | 89  |

**ge004\_min\_1\_**: Min Bracket of ge004\_1\_

| Mean     | SD   | Min      | Max      | Obs |
|----------|------|----------|----------|-----|
| 5,000.00 | 0.00 | 5,000.00 | 5,000.00 | 2   |

**ge004\_max\_1\_**: Max Bracket of ge004\_1\_

| Mean      | SD        | Min      | Max       | Obs |
|-----------|-----------|----------|-----------|-----|
| 12,500.00 | 10,606.60 | 5,000.00 | 20,000.00 | 2   |

**ge004\_min\_2\_**: Min Bracket of ge004\_2\_

| Mean     | SD       | Min   | Max       | Obs |
|----------|----------|-------|-----------|-----|
| 1,902.16 | 3,116.68 | -1.00 | 20,000.00 | 82  |

**ge004\_max\_2\_**: Max Bracket of ge004\_2\_

| Mean     | SD       | Min   | Max       | Obs |
|----------|----------|-------|-----------|-----|
| 5,040.94 | 5,228.48 | -1.00 | 20,000.00 | 85  |

**ge004\_min\_3\_**: Min Bracket of ge004\_3\_

| Mean     | SD       | Min   | Max      | Obs |
|----------|----------|-------|----------|-----|
| 1,333.00 | 1,862.19 | -1.00 | 5,000.00 | 6   |

**ge004\_max\_3\_**: Max Bracket of ge004\_3\_

| Mean     | SD       | Min      | Max       | Obs |
|----------|----------|----------|-----------|-----|
| 5,166.67 | 2,857.74 | 1,000.00 | 10,000.00 | 6   |

**ge004\_min\_4\_**: Min Bracket of ge004\_4\_

| Mean     | SD       | Min   | Max       | Obs |
|----------|----------|-------|-----------|-----|
| 1,381.49 | 2,679.70 | -1.00 | 10,000.00 | 72  |

**ge004\_max\_4\_**: Max Bracket of ge004\_4\_

| Mean     | SD       | Min   | Max       | Obs |
|----------|----------|-------|-----------|-----|
| 3,713.96 | 4,618.18 | -1.00 | 20,000.00 | 77  |



**ge004\_min\_5\_:** Min Bracket of ge004\_5\_

| Mean     | SD       | Min   | Max       | Obs |
|----------|----------|-------|-----------|-----|
| 5,249.83 | 7,515.26 | -1.00 | 20,000.00 | 12  |

**ge004\_max\_5\_:** Max Bracket of ge004\_5\_

| Mean     | SD       | Min   | Max       | Obs |
|----------|----------|-------|-----------|-----|
| 2,999.87 | 3,950.70 | -1.00 | 10,000.00 | 15  |

**ge006\_s1:** Receive Reforestation Subsidies

|       | Freq.  | %      |
|-------|--------|--------|
| 0 No  | 10,561 | 92.98  |
| 1 Yes | 797    | 7.02   |
| Total | 11,358 | 100.00 |

**ge006\_s2:** Receive Agricultural Subsidies

|       | Freq.  | %      |
|-------|--------|--------|
| 0 No  | 7,655  | 67.40  |
| 2 Yes | 3,703  | 32.60  |
| Total | 11,358 | 100.00 |

**ge006\_s3:** Receive Work Injury Subsidies

|       | Freq.  | %      |
|-------|--------|--------|
| 0 No  | 11,333 | 99.78  |
| 3 Yes | 25     | 0.22   |
| Total | 11,358 | 100.00 |

**ge006\_s4:** Receive Emergency or Disaster Relief

|       | Freq.  | %      |
|-------|--------|--------|
| 0 No  | 11,282 | 99.33  |
| 4 Yes | 76     | 0.67   |
| Total | 11,358 | 100.00 |

**ge006\_s5:** Receive Social Subsidies

|       | Freq.  | %      |
|-------|--------|--------|
| 0 No  | 11,263 | 99.16  |
| 5 Yes | 95     | 0.84   |
| Total | 11,358 | 100.00 |

**ge006\_s6:** Receive Compensation for Land Seizure

|       | Freq.  | %      |
|-------|--------|--------|
| 0 No  | 10,959 | 96.49  |
| 6 Yes | 399    | 3.51   |
| Total | 11,358 | 100.00 |

**ge006\_s7: Receive Compensation to Pull Down House or Apartment**

|       | Freq.  | %      |
|-------|--------|--------|
| 0 No  | 11,171 | 98.35  |
| 7 Yes | 187    | 1.65   |
| Total | 11,358 | 100.00 |

**ge006\_s8: Receive Other Subsidies**

|       | Freq.  | %      |
|-------|--------|--------|
| 0 No  | 10,910 | 96.06  |
| 8 Yes | 448    | 3.94   |
| Total | 11,358 | 100.00 |

**ge006\_s9: None of the Above**

|       | Freq.  | %      |
|-------|--------|--------|
| 0 No  | 4,754  | 41.86  |
| 9 Yes | 6,604  | 58.14  |
| Total | 11,358 | 100.00 |

**ge006\_1: Amount of Reforestation Subsidies**

| Mean   | SD       | Min   | Max       | Obs |
|--------|----------|-------|-----------|-----|
| 687.16 | 3,284.78 | -1.00 | 80,000.00 | 797 |

**ge006\_2: Amount of Agricultural Subsidies**

| Mean   | SD       | Min   | Max        | Obs   |
|--------|----------|-------|------------|-------|
| 765.39 | 3,849.86 | -1.00 | 150,000.00 | 3,703 |

**ge006\_3: Amount of Work Injury Subsidies**

| Mean     | SD       | Min   | Max      | Obs |
|----------|----------|-------|----------|-----|
| 2,972.08 | 2,870.16 | -1.00 | 9,600.00 | 25  |

**ge006\_4: Amount of Emergency or Disaster Relief**

| Mean     | SD       | Min   | Max       | Obs |
|----------|----------|-------|-----------|-----|
| 1,035.86 | 3,238.70 | -1.00 | 20,000.00 | 76  |

**ge006\_5: Amount of Social Subsidies**

| Mean     | SD       | Min   | Max       | Obs |
|----------|----------|-------|-----------|-----|
| 1,206.40 | 4,284.43 | -1.00 | 30,000.00 | 95  |

**ge006\_6: Amount of Compensation for Land Seizure**

| Mean      | SD        | Min   | Max        | Obs |
|-----------|-----------|-------|------------|-----|
| 16,495.18 | 50,991.96 | -1.00 | 700,000.00 | 400 |

**ge006\_7: Amount of Compensation to Pull Down House or Apartment**

| Mean       | SD         | Min   | Max          | Obs |
|------------|------------|-------|--------------|-----|
| 130,388.84 | 287,426.62 | -1.00 | 2,000,000.00 | 187 |

**ge006\_8: Amount of Other Subsidies**

| Mean     | SD       | Min   | Max       | Obs |
|----------|----------|-------|-----------|-----|
| 3,458.61 | 7,457.48 | -1.00 | 60,000.00 | 448 |

**ge007: Productive Insurance Payment**

| Mean  | SD     | Min   | Max       | Obs    |
|-------|--------|-------|-----------|--------|
| 30.24 | 862.61 | -1.00 | 78,000.00 | 11,358 |

**ge009: Photovoltaic Power Generation**

|       | Freq.  | %      |
|-------|--------|--------|
| 1 Yes | 94     | 0.83   |
| 2 No  | 11,264 | 99.17  |
| Total | 11,358 | 100.00 |

**ge010: Begin Time for Photovoltaic Power Generation**

| Mean     | SD     | Min   | Max      | Obs |
|----------|--------|-------|----------|-----|
| 1,802.29 | 625.53 | -1.00 | 2,020.00 | 94  |

**ge011: Income from Photovoltaic Power Generation**

| Mean     | SD       | Min   | Max       | Obs |
|----------|----------|-------|-----------|-----|
| 1,349.45 | 4,120.06 | -1.00 | 30,000.00 | 94  |

**ge012: Land Rent**

| Mean   | SD       | Min   | Max        | Obs    |
|--------|----------|-------|------------|--------|
| 426.66 | 4,055.78 | -1.00 | 350,000.00 | 11,358 |

**ge012\_min: Min Bracket of ge012**

| Mean   | SD       | Min   | Max      | Obs |
|--------|----------|-------|----------|-----|
| 693.33 | 1,357.43 | -1.00 | 5,000.00 | 49  |

**ge012\_max: Max Bracket of ge012**

| Mean     | SD       | Min   | Max       | Obs |
|----------|----------|-------|-----------|-----|
| 1,414.83 | 2,425.25 | -1.00 | 10,000.00 | 59  |

**ge013: House Rent**

| Mean   | SD       | Min   | Max        | Obs    |
|--------|----------|-------|------------|--------|
| 889.93 | 7,753.70 | -1.00 | 350,000.00 | 11,358 |

**ge013\_min: Min Bracket of ge013**

| Mean     | SD       | Min   | Max      | Obs |
|----------|----------|-------|----------|-----|
| 1,405.69 | 2,170.02 | -1.00 | 5,000.00 | 16  |

**ge013\_max: Max Bracket of ge013**

| Mean     | SD       | Min   | Max       | Obs |
|----------|----------|-------|-----------|-----|
| 1,655.63 | 2,970.89 | -1.00 | 10,000.00 | 16  |

**ge014: Rental Income from Other Household Assets**

|                       | Freq.  | %      |
|-----------------------|--------|--------|
| 1 Yes                 | 41     | 0.36   |
| 2 No                  | 11,299 | 99.48  |
| 997 Do not Know       | 17     | 0.15   |
| 999 Refused to Answer | 1      | 0.01   |
| Total                 | 11,358 | 100.00 |

**ge014\_1: Amount of Rental Income from Other Household Assets**

| Mean     | SD        | Min  | Max       | Obs |
|----------|-----------|------|-----------|-----|
| 7,841.46 | 14,430.89 | 0.00 | 75,000.00 | 41  |

**gf001: Monthly Household Expenditure**

| Mean     | SD       | Min  | Max        | Obs    |
|----------|----------|------|------------|--------|
| 2,315.37 | 3,075.04 | 0.00 | 142,000.00 | 11,356 |

**gf002: Primary Person Who Purchases Food**

|       | Freq.  | %      |
|-------|--------|--------|
| 1 Yes | 9,273  | 81.66  |
| 2 No  | 2,083  | 18.34  |
| Total | 11,356 | 100.00 |

**gf003: Who is Primary Person Purchasing Food**

|                             | Freq. | %      |
|-----------------------------|-------|--------|
| 1 XChildAliveName[1]        | 257   | 12.34  |
| 2 XChildAliveName[2]        | 120   | 5.76   |
| 3 XChildAliveName[3]        | 70    | 3.36   |
| 4 XChildAliveName[4]        | 42    | 2.02   |
| 5 XChildAliveName[5]        | 15    | 0.72   |
| 6 XChildAliveName[6]        | 7     | 0.34   |
| 7 XChildAliveName[7]        | 2     | 0.10   |
| 8 XChildAliveName[8]        | 1     | 0.05   |
| 9 XChildAliveName[9]        | 1     | 0.05   |
| 11 XChildAliveName[11]      | 1     | 0.05   |
| 26 XHHOtherMemberName2[1]   | 179   | 8.60   |
| 27 XHHOtherMemberName2[2]   | 12    | 0.58   |
| 28 XHHOtherMemberName2[3]   | 17    | 0.82   |
| 29 XHHOtherMemberName2[4]   | 6     | 0.29   |
| 36 Main Respondent          | 429   | 20.61  |
| 37 Main Respondent's Spouse | 692   | 33.24  |
| 38 Domestic Servant         | 12    | 0.58   |
| 39 Neighbor                 | 5     | 0.24   |
| 40 Other                    | 214   | 10.28  |
| Total                       | 2,082 | 100.00 |

**gf004: Number of People Ate Meals in the Past Week**

| Mean | SD   | Min  | Max   | Obs    |
|------|------|------|-------|--------|
| 3.10 | 1.82 | 0.00 | 25.00 | 11,355 |

**gf005: Number of Meals Provided to Guests**

| Mean | SD   | Min  | Max    | Obs    |
|------|------|------|--------|--------|
| 1.53 | 7.58 | 0.00 | 251.00 | 11,355 |

**gf006: Food Expenditure, Excluding Some Items**

| Mean   | SD     | Min  | Max       | Obs    |
|--------|--------|------|-----------|--------|
| 303.70 | 558.08 | 0.00 | 38,000.00 | 11,355 |

**gf007: Produce Agricultural Products Yourself**

|       | Freq.  | %      |
|-------|--------|--------|
| 1 Yes | 5,836  | 51.40  |
| 2 No  | 5,519  | 48.60  |
| Total | 11,355 | 100.00 |

**gf008: Market Value of Agricultural Products**

| Mean   | SD     | Min  | Max      | Obs   |
|--------|--------|------|----------|-------|
| 111.74 | 212.57 | 0.00 | 5,500.00 | 5,836 |

**gf009: Eating Out**

| Mean  | SD     | Min  | Max      | Obs    |
|-------|--------|------|----------|--------|
| 50.38 | 216.01 | 0.00 | 6,000.00 | 11,355 |

**gf010: Alcohol, Cigarettes, Cigars and Tobacco**

| Mean  | SD     | Min  | Max       | Obs    |
|-------|--------|------|-----------|--------|
| 70.21 | 222.79 | 0.00 | 15,000.00 | 11,354 |

**gf011\_1: Communication Fees**

| Mean   | SD     | Min   | Max       | Obs    |
|--------|--------|-------|-----------|--------|
| 163.79 | 245.96 | -1.00 | 10,000.00 | 11,354 |

**gf011\_2: Utilities**

| Mean   | SD     | Min   | Max       | Obs    |
|--------|--------|-------|-----------|--------|
| 162.12 | 388.01 | -1.00 | 30,000.00 | 11,354 |

**gf011\_3: Fuels**

| Mean  | SD     | Min   | Max       | Obs    |
|-------|--------|-------|-----------|--------|
| 75.93 | 199.37 | -1.00 | 10,000.00 | 11,354 |

**gf011\_4: Fees for Matron, Housekeepers and Servants**

| Mean  | SD     | Min   | Max       | Obs    |
|-------|--------|-------|-----------|--------|
| 27.73 | 387.03 | -1.00 | 15,000.00 | 11,354 |

**gf011\_5: Local Transportation**

| Mean  | SD     | Min   | Max       | Obs    |
|-------|--------|-------|-----------|--------|
| 74.82 | 268.82 | -1.00 | 10,000.00 | 11,354 |

**gf011\_6: Household Items and Personal Toiletries**

| Mean  | SD     | Min   | Max       | Obs    |
|-------|--------|-------|-----------|--------|
| 93.30 | 224.35 | -1.00 | 10,000.00 | 11,354 |

**gf011\_7: Entertainment**

| Mean | SD    | Min   | Max      | Obs    |
|------|-------|-------|----------|--------|
| 9.99 | 67.23 | -1.00 | 4,000.00 | 11,354 |

**gf012\_s1: Elderly in the Household**

|       | Freq. | %      |
|-------|-------|--------|
| 0 No  | 55    | 47.83  |
| 1 Yes | 60    | 52.17  |
| Total | 115   | 100.00 |

**gf012\_s2: Child in the Household**

|       | Freq. | %      |
|-------|-------|--------|
| 0 No  | 104   | 90.43  |
| 2 Yes | 11    | 9.57   |
| Total | 115   | 100.00 |

**gf012\_s3: Others**

|       | Freq. | %      |
|-------|-------|--------|
| 0 No  | 88    | 76.52  |
| 3 Yes | 27    | 23.48  |
| Total | 115   | 100.00 |

**gf012\_s4: None of the Above**

|       | Freq. | %      |
|-------|-------|--------|
| 0 No  | 89    | 77.39  |
| 4 Yes | 26    | 22.61  |
| Total | 115   | 100.00 |

**gf013\_1: Clothing and Bedding**

| Mean     | SD       | Min   | Max        | Obs    |
|----------|----------|-------|------------|--------|
| 1,755.70 | 3,462.12 | -1.00 | 100,000.00 | 11,354 |

**gf013\_2: Traveling Expenses**

| Mean   | SD       | Min   | Max        | Obs    |
|--------|----------|-------|------------|--------|
| 777.02 | 3,372.70 | -1.00 | 100,000.00 | 11,354 |

**gf013\_3: Heating**

| Mean   | SD     | Min   | Max       | Obs    |
|--------|--------|-------|-----------|--------|
| 268.94 | 977.53 | -1.00 | 42,000.00 | 11,354 |

**gf013\_4: Furniture, Durable Goods and Electronics**

| Mean     | SD       | Min   | Max        | Obs    |
|----------|----------|-------|------------|--------|
| 1,055.86 | 6,511.01 | -1.00 | 350,000.00 | 11,354 |

**gf013\_5: Education and Training**

| Mean     | SD       | Min   | Max        | Obs    |
|----------|----------|-------|------------|--------|
| 1,856.32 | 7,289.42 | -1.00 | 300,000.00 | 11,354 |

**gf013\_6: Medical Expenditure**

| Mean     | SD        | Min   | Max        | Obs    |
|----------|-----------|-------|------------|--------|
| 5,911.29 | 18,487.35 | -1.00 | 650,000.00 | 11,354 |

**gf013\_7: Fitness Expenditures**

| Mean   | SD       | Min   | Max       | Obs    |
|--------|----------|-------|-----------|--------|
| 257.38 | 1,862.09 | -1.00 | 50,000.00 | 11,354 |

**gf013\_8: Beauty**

| Mean   | SD       | Min   | Max       | Obs    |
|--------|----------|-------|-----------|--------|
| 272.93 | 1,378.69 | -1.00 | 75,000.00 | 11,354 |

**gf013\_9: Automobiles**

| Mean     | SD        | Min   | Max        | Obs    |
|----------|-----------|-------|------------|--------|
| 2,237.07 | 16,954.52 | -1.00 | 500,000.00 | 11,354 |

**gf013\_10: Purchase, Maintenance and Repair**

| Mean   | SD       | Min   | Max        | Obs    |
|--------|----------|-------|------------|--------|
| 880.78 | 2,543.24 | -1.00 | 100,000.00 | 11,354 |

**gf013\_11: Property Management Fees**

| Mean   | SD       | Min   | Max       | Obs    |
|--------|----------|-------|-----------|--------|
| 256.98 | 1,307.62 | -1.00 | 69,200.00 | 11,354 |

**gf013\_12: Taxes and Fees**

| Mean   | SD       | Min   | Max        | Obs    |
|--------|----------|-------|------------|--------|
| 221.33 | 6,596.19 | -1.00 | 500,000.00 | 11,354 |



**gf013\_13: Donations**

| Mean   | SD     | Min   | Max       | Obs    |
|--------|--------|-------|-----------|--------|
| 116.38 | 764.19 | -1.00 | 50,000.00 | 11,354 |

**gf013\_14: Rent**

| Mean   | SD       | Min   | Max        | Obs    |
|--------|----------|-------|------------|--------|
| 772.37 | 4,878.55 | -1.00 | 240,000.00 | 11,354 |

**gf013\_15: Banquet and Wedding Expenditure**

| Mean   | SD       | Min   | Max        | Obs    |
|--------|----------|-------|------------|--------|
| 899.51 | 7,003.56 | -1.00 | 300,000.00 | 11,354 |

**gf013\_16: COVID Prevention Expenditure**

| Mean   | SD     | Min   | Max       | Obs    |
|--------|--------|-------|-----------|--------|
| 184.59 | 432.88 | -1.00 | 15,000.00 | 11,354 |

**gf014: Is Expenditure Covered by Income?**

|                  | Freq.  | %      |
|------------------|--------|--------|
| 1 Very Difficult | 1,640  | 14.44  |
| 2 Difficult      | 4,952  | 43.61  |
| 3 Easy           | 4,298  | 37.85  |
| 4 Very Easy      | 464    | 4.09   |
| Total            | 11,354 | 100.00 |

**gf015\_s1: Stop Paying Rent**

|       | Freq. | %      |
|-------|-------|--------|
| 0 No  | 6,557 | 99.47  |
| 1 Yes | 35    | 0.53   |
| Total | 6,592 | 100.00 |

**gf015\_s2: Stop Paying Mortgage**

|       | Freq. | %      |
|-------|-------|--------|
| 0 No  | 6,571 | 99.68  |
| 2 Yes | 21    | 0.32   |
| Total | 6,592 | 100.00 |

**gf015\_s3: Stop Paying Utility Bill**

|      | Freq. | %     |
|------|-------|-------|
| 0 No | 6,465 | 98.07 |

|       |       |        |
|-------|-------|--------|
| 3 Yes | 127   | 1.93   |
| Total | 6,592 | 100.00 |

**gf015\_s4: None of the Above**

|       | Freq. | %      |
|-------|-------|--------|
| 0 No  | 167   | 2.53   |
| 4 Yes | 6,425 | 97.47  |
| Total | 6,592 | 100.00 |

**gf016\_s1: Reduce Spendings**

|       | Freq. | %      |
|-------|-------|--------|
| 0 No  | 2,468 | 37.45  |
| 1 Yes | 4,123 | 62.55  |
| Total | 6,591 | 100.00 |

**gf016\_s2: Use Savings**

|       | Freq. | %      |
|-------|-------|--------|
| 0 No  | 5,146 | 78.08  |
| 2 Yes | 1,445 | 21.92  |
| Total | 6,591 | 100.00 |

**gf016\_s3: Sale of Assets**

|       | Freq. | %      |
|-------|-------|--------|
| 0 No  | 6,451 | 97.88  |
| 3 Yes | 140   | 2.12   |
| Total | 6,591 | 100.00 |

**gf016\_s4: Help from Relatives and Friends**

|       | Freq. | %      |
|-------|-------|--------|
| 0 No  | 6,090 | 92.40  |
| 4 Yes | 501   | 7.60   |
| Total | 6,591 | 100.00 |

**gf016\_s5: Borrow Money from Relatives and Friends**

|       | Freq. | %      |
|-------|-------|--------|
| 0 No  | 5,533 | 83.95  |
| 5 Yes | 1,058 | 16.05  |
| Total | 6,591 | 100.00 |

**gf016\_s6: Borrow Money from Banks**

|  | Freq. | % |
|--|-------|---|
|--|-------|---|

|       |       |        |
|-------|-------|--------|
| 0 No  | 6,271 | 95.14  |
| 6 Yes | 320   | 4.86   |
| Total | 6,591 | 100.00 |

**gf016\_s7: Others**

|       | Freq. | %      |
|-------|-------|--------|
| 0 No  | 6,404 | 97.16  |
| 7 Yes | 187   | 2.84   |
| Total | 6,591 | 100.00 |

**gf016\_s8: Others**

|       | Freq. | %      |
|-------|-------|--------|
| 0 No  | 5,168 | 78.41  |
| 8 Yes | 1,423 | 21.59  |
| Total | 6,591 | 100.00 |

**gf016\_1: Amount of Spendings Reduced**

| Mean     | SD       | Min   | Max       | Obs   |
|----------|----------|-------|-----------|-------|
| 2,447.66 | 4,299.23 | -1.00 | 50,000.00 | 4,123 |

**gf016\_2: Amount of Savings**

| Mean      | SD        | Min   | Max        | Obs   |
|-----------|-----------|-------|------------|-------|
| 13,488.79 | 31,542.48 | -1.00 | 600,000.00 | 1,445 |

**gf016\_3: Amount of Assets**

| Mean      | SD         | Min   | Max          | Obs |
|-----------|------------|-------|--------------|-----|
| 47,281.72 | 422,592.44 | -1.00 | 5,000,000.00 | 140 |

**gf016\_4: Value of Helps**

| Mean     | SD        | Min   | Max        | Obs |
|----------|-----------|-------|------------|-----|
| 5,720.66 | 13,599.80 | -1.00 | 200,000.00 | 501 |

**gf016\_5: Amount of Money Borrow from Relatives and Friends**

| Mean      | SD        | Min   | Max          | Obs   |
|-----------|-----------|-------|--------------|-------|
| 26,662.93 | 58,496.22 | -1.00 | 1,000,000.00 | 1,058 |

**gf016\_6: Amount of Money Borrow from Banks**

| Mean | SD | Min | Max | Obs |
|------|----|-----|-----|-----|
|------|----|-----|-----|-----|

|           |            |       |              |     |
|-----------|------------|-------|--------------|-----|
| 97,629.62 | 216,523.58 | -1.00 | 3,000,000.00 | 320 |
|-----------|------------|-------|--------------|-----|

**gf016\_7: Amount from Other Methods**

| Mean     | SD        | Min   | Max        | Obs |
|----------|-----------|-------|------------|-----|
| 7,673.42 | 16,583.34 | -1.00 | 150,000.00 | 187 |

**gf017: Receive Assistance**

|                           | Freq.  | %      |
|---------------------------|--------|--------|
| 1 Never                   | 8,630  | 76.02  |
| 2 A Few Times             | 2,378  | 20.95  |
| 3 Most or All of the Time | 345    | 3.04   |
| Total                     | 11,353 | 100.00 |

**i028: House Size**

| Mean   | SD     | Min  | Max      | Obs    |
|--------|--------|------|----------|--------|
| 138.17 | 111.44 | 1.00 | 2,129.60 | 11,352 |

**i001: Building Structure**

|                                      | Freq.  | %      |
|--------------------------------------|--------|--------|
| 1 Concrete and Steel/Bricks and Wood | 10,255 | 90.33  |
| 2 Adobe                              | 655    | 5.77   |
| 3 Wood/Thatched                      | 26     | 0.23   |
| 4 Cave Dwelling                      | 52     | 0.46   |
| 5 Mongolian Yurt/Woolen Felt/Tent    | 5      | 0.04   |
| 6 Stone                              | 144    | 1.27   |
| 7 Other                              | 216    | 1.90   |
| Total                                | 11,353 | 100.00 |

**i002: Time House Built**

| Mean     | SD     | Min   | Max      | Obs    |
|----------|--------|-------|----------|--------|
| 1,872.60 | 493.88 | -1.00 | 2,020.00 | 11,353 |

**i003: Time Interval House Built**

|                      | Freq. | %      |
|----------------------|-------|--------|
| 1 0-5 Years          | 30    | 4.07   |
| 2 5-10 Years         | 76    | 10.31  |
| 3 10-20 Years        | 187   | 25.37  |
| 4 20-30 Years        | 195   | 26.46  |
| 5 30-40 Years        | 111   | 15.06  |
| 6 More Than 40 Years | 138   | 18.72  |
| Total                | 737   | 100.00 |

**i004: One Storey or Multi-level Building**

|                                        | Freq.  | %      |
|----------------------------------------|--------|--------|
| 1 One-storey Building                  | 4,426  | 38.99  |
| 2 Common Multi-storey Building         | 2,904  | 25.58  |
| 3 Self-contained Multi-storey Building | 4,023  | 35.44  |
| Total                                  | 11,353 | 100.00 |

**i005: The Storey is Independent or Compound**

|                      | Freq. | %      |
|----------------------|-------|--------|
| 1 Independent Storey | 4,054 | 91.60  |
| 2 Compound           | 372   | 8.40   |
| Total                | 4,426 | 100.00 |

**i006: Which Storey**

|                 | Freq. | %      |
|-----------------|-------|--------|
| 1 On the Ground | 2,896 | 99.72  |
| 2 Underground   | 8     | 0.28   |
| Total           | 2,904 | 100.00 |

**i006\_1: Which Storey on the Ground**

| Mean | SD   | Min  | Max   | Obs   |
|------|------|------|-------|-------|
| 4.74 | 5.05 | 1.00 | 38.00 | 2,896 |

**i006\_2: Which Storey Underground**

| Mean | SD   | Min  | Max  | Obs |
|------|------|------|------|-----|
| 1.38 | 1.06 | 1.00 | 4.00 | 8   |

**i007: Elevator**

|       | Freq. | %      |
|-------|-------|--------|
| 1 Yes | 698   | 10.93  |
| 2 No  | 5,688 | 89.07  |
| Total | 6,386 | 100.00 |

**i008: Building Time for Elevator**

|                             | Freq. | %      |
|-----------------------------|-------|--------|
| 1 The Same Time as Building | 679   | 97.28  |
| 2 Later Added               | 5     | 0.72   |
| 3 Do not Know               | 14    | 2.01   |
| Total                       | 698   | 100.00 |

**i008\_1: Time for Later Added Elevator**

| Mean     | SD       | Min   | Max      | Obs |
|----------|----------|-------|----------|-----|
| 1,210.20 | 1,105.67 | -1.00 | 2,018.00 | 5   |

### i009: Handicapped Facilities

|               | Freq.  | %      |
|---------------|--------|--------|
| 1 Yes         | 2,050  | 18.06  |
| 2 No          | 4,731  | 41.67  |
| 3 Do Not Need | 4,572  | 40.27  |
| Total         | 11,353 | 100.00 |

### i010: Steps to Main Entrance of the House

| Mean  | SD    | Min  | Max    | Obs   |
|-------|-------|------|--------|-------|
| 19.33 | 33.46 | 0.00 | 540.00 | 4,731 |

### i011\_1: Bedrooms

| Mean | SD   | Min  | Max   | Obs    |
|------|------|------|-------|--------|
| 3.18 | 2.17 | 0.00 | 43.00 | 11,353 |

### i011\_2: Livingrooms

| Mean | SD   | Min  | Max   | Obs    |
|------|------|------|-------|--------|
| 1.23 | 0.77 | 0.00 | 11.00 | 11,353 |

### i011\_3: Toilets

| Mean | SD   | Min  | Max   | Obs    |
|------|------|------|-------|--------|
| 1.27 | 1.23 | 0.00 | 46.00 | 11,353 |

### i011\_4: Kitchens

| Mean | SD   | Min  | Max   | Obs    |
|------|------|------|-------|--------|
| 1.03 | 0.61 | 0.00 | 33.00 | 11,353 |

### i011\_5: Balcony

| Mean | SD   | Min  | Max   | Obs    |
|------|------|------|-------|--------|
| 0.62 | 0.80 | 0.00 | 11.00 | 11,353 |

### i012: Distance from the Nearest Toilet to House

| Mean  | SD     | Min  | Max      | Obs   |
|-------|--------|------|----------|-------|
| 43.35 | 103.55 | 0.00 | 2,000.00 | 1,413 |

**i013: Type of Toilet**

|                  | Freq.  | %      |
|------------------|--------|--------|
| 1 Without a Seat | 7,120  | 62.71  |
| 2 With a Seat    | 4,233  | 37.29  |
| Total            | 11,353 | 100.00 |

**i014: Flushable Toilet**

|       | Freq. | %      |
|-------|-------|--------|
| 1 Yes | 3,931 | 55.21  |
| 2 No  | 3,189 | 44.79  |
| Total | 7,120 | 100.00 |

**i015: Electricity**

|       | Freq.  | %      |
|-------|--------|--------|
| 1 Yes | 11,277 | 99.33  |
| 2 No  | 76     | 0.67   |
| Total | 11,353 | 100.00 |

**i016: Tap Water**

|       | Freq.  | %      |
|-------|--------|--------|
| 1 Yes | 10,304 | 90.76  |
| 2 No  | 1,049  | 9.24   |
| Total | 11,353 | 100.00 |

**i029: Water is Treated by Waterworks**

|                 | Freq.  | %      |
|-----------------|--------|--------|
| 1 Yes           | 6,686  | 64.89  |
| 2 No            | 3,214  | 31.19  |
| 997 Do not Know | 404    | 3.92   |
| Total           | 10,304 | 100.00 |

**i017: In-house Shower**

|                            | Freq.  | %      |
|----------------------------|--------|--------|
| 1 Unified Hot Water Supply | 161    | 1.42   |
| 2 Water Heater             | 7,968  | 70.19  |
| 3 No                       | 3,223  | 28.39  |
| Total                      | 11,352 | 100.00 |

**i018: Coal Gas or Natural Gas Supply**

|       | Freq. | %     |
|-------|-------|-------|
| 1 Yes | 3,025 | 26.65 |
| 2 No  | 8,327 | 73.35 |

|       |        |        |
|-------|--------|--------|
| Total | 11,352 | 100.00 |
|-------|--------|--------|

**i019: Centralized Heating**

|       | Freq.  | %      |
|-------|--------|--------|
| 1 Yes | 1,281  | 11.28  |
| 2 No  | 10,071 | 88.72  |
| Total | 11,352 | 100.00 |

**i020: Heating Energy Source**

|                             | Freq.  | %      |
|-----------------------------|--------|--------|
| 1 Solar                     | 42     | 0.42   |
| 2 Coal                      | 2,320  | 23.04  |
| 3 Natural Gas               | 339    | 3.37   |
| 4 Liquefied Petroleum Gas   | 36     | 0.36   |
| 5 Electric                  | 3,088  | 30.66  |
| 6 Crop Residue/Wood Burning | 1,353  | 13.43  |
| 7 Others                    | 109    | 1.08   |
| 8 Do not Heating            | 2,784  | 27.64  |
| Total                       | 10,071 | 100.00 |

**i021: Main Source of Cooking Fuel**

|                             | Freq.  | %      |
|-----------------------------|--------|--------|
| 1 Coal                      | 468    | 4.12   |
| 2 Natural Gas               | 3,431  | 30.22  |
| 3 Marsh Gas                 | 24     | 0.21   |
| 4 Liquefied Petroleum Gas   | 1,733  | 15.27  |
| 5 Electric                  | 3,051  | 26.88  |
| 6 Crop Residue/Wood Burning | 2,422  | 21.34  |
| 7 Solar Energy              | 4      | 0.04   |
| 8 Others                    | 151    | 1.33   |
| 9 Do not Cook               | 68     | 0.60   |
| Total                       | 11,352 | 100.00 |

**i022: Telephone**

|       | Freq.  | %      |
|-------|--------|--------|
| 1 Yes | 1,541  | 13.57  |
| 2 No  | 9,811  | 86.43  |
| Total | 11,352 | 100.00 |

**i023: Broad-band Internet Connection**

|       | Freq.  | %      |
|-------|--------|--------|
| 1 Yes | 6,749  | 59.45  |
| 2 No  | 4,603  | 40.55  |
| Total | 11,352 | 100.00 |

**i024: Air Cleaner**



|       | Freq.  | %      |
|-------|--------|--------|
| 1 Yes | 442    | 3.89   |
| 2 No  | 10,910 | 96.11  |
| Total | 11,352 | 100.00 |

**i025: Clear and Tidy in this Household**

|                  | Freq.  | %      |
|------------------|--------|--------|
| 1 Excellent      | 1,427  | 12.57  |
| 2 Very Clear     | 2,250  | 19.82  |
| 3 Clear          | 3,798  | 33.46  |
| 4 Fair           | 2,614  | 23.03  |
| 5 Poor           | 509    | 4.48   |
| 6 Not Applicable | 754    | 6.64   |
| Total            | 11,352 | 100.00 |

**i026: Temperature in this Household**

|                  | Freq.  | %      |
|------------------|--------|--------|
| 1 Very Hot       | 30     | 0.26   |
| 2 Hot            | 706    | 6.22   |
| 3 Bearable       | 9,715  | 85.58  |
| 4 Cold           | 141    | 1.24   |
| 5 Very Cold      | 5      | 0.04   |
| 6 Not Applicable | 755    | 6.65   |
| Total            | 11,352 | 100.00 |

**i027: Ground Condition in this Household**

|                 | Freq.  | %      |
|-----------------|--------|--------|
| 1 Flat Coverd   | 7,359  | 64.83  |
| 2 Flat Concrete | 3,518  | 30.99  |
| 3 Uneven        | 475    | 4.18   |
| Total           | 11,352 | 100.00 |

**xgb005text\_1\_: Text for gb005\_1\_**

| A String Variable |       |
|-------------------|-------|
| Obs:              | 1,536 |

**xgb005text\_2\_: Text for gb005\_2\_**

| A String Variable |     |
|-------------------|-----|
| Obs:              | 639 |

**xgb005text\_3\_: Text for gb005\_3\_**

| A String Variable |  |
|-------------------|--|
|-------------------|--|

|      |     |
|------|-----|
| Obs: | 159 |
|------|-----|

xgb005text\_4\_: Text for gb005\_4\_

|                   |    |
|-------------------|----|
| A String Variable |    |
| Obs:              | 85 |

xgb005text\_5\_: Text for gb005\_5\_

|                   |    |
|-------------------|----|
| A String Variable |    |
| Obs:              | 25 |

xgb005text\_6\_: Text for gb005\_6\_

|                   |   |
|-------------------|---|
| A String Variable |   |
| Obs:              | 3 |

xgb005text\_7\_: Text for gb005\_7\_

|                   |   |
|-------------------|---|
| A String Variable |   |
| Obs:              | 4 |

xgb005text\_8\_: Text for gb005\_8\_

|                   |   |
|-------------------|---|
| A String Variable |   |
| Obs:              | 4 |

xgb005text\_9\_: Text for gb005\_9\_

|                   |   |
|-------------------|---|
| A String Variable |   |
| Obs:              | 1 |

xgb005text\_10\_: Text for gb005\_10\_

|                   |   |
|-------------------|---|
| A String Variable |   |
| Obs:              | 3 |

xpoorhname\_1\_: Wubao Text

|                   |       |
|-------------------|-------|
| A String Variable |       |
| Obs:              | 1,830 |

xpoorhname\_2\_: Dibao Text

|                   |  |
|-------------------|--|
| A String Variable |  |
|-------------------|--|

|      |       |
|------|-------|
| Obs: | 1,830 |
|------|-------|

**xpoorhhname\_3\_:** Tekun Text

| A String Variable |       |
|-------------------|-------|
| Obs:              | 1,830 |

**xpoorhhname\_4\_:** Jiandanglika Poor Household Text

| A String Variable |       |
|-------------------|-------|
| Obs:              | 1,830 |

**xpoorlstyr\_1\_:** Wubao Last Year

| Mean | SD   | Min  | Max  | Obs |
|------|------|------|------|-----|
| 0.93 | 0.26 | 0.00 | 1.00 | 128 |

**xpoorlstyr\_2\_:** Dibao Last Year

| Mean | SD   | Min  | Max  | Obs   |
|------|------|------|------|-------|
| 0.82 | 0.39 | 0.00 | 1.00 | 1,027 |

**xpoorlstyr\_3\_:** Tekun Last Year

| Mean | SD   | Min  | Max  | Obs |
|------|------|------|------|-----|
| 0.82 | 0.39 | 0.00 | 1.00 | 66  |

**xpoorlstyr\_4\_:** Jiandanglika Poor Household Last Year

| Mean | SD   | Min  | Max  | Obs |
|------|------|------|------|-----|
| 0.82 | 0.39 | 0.00 | 1.00 | 782 |

**xpoorlstyr\_5\_:** Other Poor Household Last Year

| Mean | SD   | Min  | Max  | Obs |
|------|------|------|------|-----|
| 0.84 | 0.37 | 0.00 | 1.00 | 106 |

**xchildnum:** Num of Children

| Mean | SD   | Min  | Max   | Obs    |
|------|------|------|-------|--------|
| 2.56 | 1.38 | 0.00 | 10.00 | 11,376 |

**xhhmembernum:** Num of Household Member, Exclude Main Respondent and Spouse

| Mean | SD | Min | Max | Obs |
|------|----|-----|-----|-----|
|------|----|-----|-----|-----|

|      |      |      |       |        |
|------|------|------|-------|--------|
| 1.14 | 1.55 | 0.00 | 14.00 | 11,376 |
|------|------|------|-------|--------|

**xhhmemberage\_1\_:** Household Member[1]'s Age

| Mean  | SD    | Min  | Max    | Obs   |
|-------|-------|------|--------|-------|
| 34.07 | 16.99 | 1.00 | 117.00 | 5,578 |

**xhhmemberage\_2\_:** Household Member[2]'s Age

| Mean  | SD    | Min  | Max   | Obs   |
|-------|-------|------|-------|-------|
| 30.00 | 18.62 | 0.00 | 99.00 | 3,313 |

**xhhmemberage\_3\_:** Household Member[3]'s Age

| Mean  | SD    | Min  | Max   | Obs   |
|-------|-------|------|-------|-------|
| 16.98 | 16.15 | 0.00 | 95.00 | 2,054 |

**xhhmemberage\_4\_:** Household Member[4]'s Age

| Mean  | SD    | Min  | Max   | Obs   |
|-------|-------|------|-------|-------|
| 14.17 | 14.93 | 0.00 | 98.00 | 1,147 |

**xhhmemberage\_5\_:** Household Member[5]'s Age

| Mean  | SD    | Min  | Max   | Obs |
|-------|-------|------|-------|-----|
| 13.02 | 14.77 | 0.00 | 95.00 | 364 |

**xhhmemberage\_6\_:** Household Member[6]'s Age

| Mean  | SD    | Min  | Max   | Obs |
|-------|-------|------|-------|-----|
| 12.87 | 14.88 | 0.00 | 94.00 | 157 |

**xhhmemberage\_7\_:** Household Member[7]'s Age

| Mean  | SD    | Min  | Max   | Obs |
|-------|-------|------|-------|-----|
| 12.86 | 15.62 | 0.00 | 91.00 | 84  |

**xhhmemberage\_8\_:** Household Member[8]'s Age

| Mean  | SD    | Min  | Max   | Obs |
|-------|-------|------|-------|-----|
| 12.40 | 14.79 | 0.00 | 59.00 | 42  |

**xhhmemberage\_9\_:** Household Member[9]'s Age

| Mean | SD | Min | Max | Obs |
|------|----|-----|-----|-----|
|------|----|-----|-----|-----|

|      |      |      |       |    |
|------|------|------|-------|----|
| 8.14 | 8.06 | 0.00 | 35.00 | 22 |
|------|------|------|-------|----|

**xhhmemberage\_10\_:** Household Member[10]'s Age

| Mean  | SD    | Min  | Max   | Obs |
|-------|-------|------|-------|-----|
| 10.29 | 10.37 | 1.00 | 31.00 | 14  |

**xhhmemberage\_11\_:** Household Member[11]'s Age

| Mean  | SD   | Min  | Max   | Obs |
|-------|------|------|-------|-----|
| 11.43 | 9.93 | 1.00 | 28.00 | 7   |

**xhhmemberage\_12\_:** Household Member[12]'s Age

| Mean | SD    | Min  | Max   | Obs |
|------|-------|------|-------|-----|
| 9.67 | 13.32 | 1.00 | 25.00 | 3   |

**xhhmemberage\_13\_:** Household Member[13]'s Age

| Mean  | SD | Min   | Max   | Obs |
|-------|----|-------|-------|-----|
| 23.00 | .  | 23.00 | 23.00 | 1   |

**xhhmemberage\_14\_:** Household Member[14]'s Age

| Mean  | SD | Min   | Max   | Obs |
|-------|----|-------|-------|-----|
| 20.00 | .  | 20.00 | 20.00 | 1   |

**versionID:** Version ID

| A String Variable |  |  |  |        |
|-------------------|--|--|--|--------|
| Obs:              |  |  |  | 11,377 |

*This page intentionally left blank*

## MODULE G2

---

### Individual Income

---

ID: Individual ID

|                   |        |
|-------------------|--------|
| A String Variable |        |
| Obs:              | 19,349 |

householdID: Household ID

|                   |        |
|-------------------|--------|
| A String Variable |        |
| Obs:              | 19,349 |

communityID: Community ID

|                   |        |
|-------------------|--------|
| A String Variable |        |
| Obs:              | 19,349 |

ga001: Wage and Bonus Income

|       | Freq.  | %      |
|-------|--------|--------|
| 1 Yes | 4,920  | 25.43  |
| 2 No  | 14,425 | 74.57  |
| Total | 19,345 | 100.00 |

ga002: Amount

| Mean      | SD        | Min   | Max          | Obs   |
|-----------|-----------|-------|--------------|-------|
| 26,964.62 | 40,528.94 | -1.00 | 1,500,000.00 | 4,919 |

ga002\_min: Min Bracket of ga002

| Mean      | SD        | Min   | Max        | Obs |
|-----------|-----------|-------|------------|-----|
| 19,403.43 | 25,080.84 | -1.00 | 100,000.00 | 109 |

**ga002\_max: Max Bracket of ga002**

| Mean      | SD        | Min   | Max        | Obs |
|-----------|-----------|-------|------------|-----|
| 23,833.13 | 27,968.75 | -1.00 | 100,000.00 | 120 |

**ga003: Exclude Insurance and Some Others**

|                       | Freq. | %      |
|-----------------------|-------|--------|
| 1 Yes                 | 897   | 18.24  |
| 2 No                  | 3,952 | 80.34  |
| 997 Do not Know       | 68    | 1.38   |
| 999 Refused to Answer | 2     | 0.04   |
| Total                 | 4,919 | 100.00 |

**ga004: Total Excluded Amount**

|                      | Freq. | %      |
|----------------------|-------|--------|
| 1 Yuan/Month         | 777   | 15.80  |
| 2 Yuan/Year          | 413   | 8.40   |
| 3 Percentage of Wage | 162   | 3.29   |
| 4 No                 | 3,565 | 72.50  |
| Total                | 4,917 | 100.00 |

**ga004\_1: Yuan/Month**

| Mean   | SD     | Min   | Max      | Obs |
|--------|--------|-------|----------|-----|
| 641.71 | 966.74 | -1.00 | 6,100.00 | 777 |

**ga004\_1\_min: Min Bracket of ga004\_1**

| Mean   | SD     | Min   | Max      | Obs |
|--------|--------|-------|----------|-----|
| 499.86 | 784.86 | -1.00 | 3,000.00 | 274 |

**ga004\_1\_max: Max Bracket of ga004\_1**

| Mean   | SD     | Min   | Max      | Obs |
|--------|--------|-------|----------|-----|
| 556.53 | 805.92 | -1.00 | 3,000.00 | 286 |

**ga004\_2: Yuan/Year**

| Mean     | SD        | Min   | Max        | Obs |
|----------|-----------|-------|------------|-----|
| 5,748.23 | 11,268.78 | 30.00 | 100,000.00 | 413 |

**ga004\_3: Percentage of Wage**

| Mean  | SD   | Min  | Max   | Obs |
|-------|------|------|-------|-----|
| 13.78 | 9.90 | 0.01 | 50.00 | 162 |



**ga005\_s1: Pension Receive**

|       | Freq.  | %      |
|-------|--------|--------|
| 0 No  | 9,603  | 49.65  |
| 1 Yes | 9,740  | 50.35  |
| Total | 19,343 | 100.00 |

**ga005\_s2: Unemployment Compensation Receive**

|       | Freq.  | %      |
|-------|--------|--------|
| 0 No  | 19,299 | 99.77  |
| 2 Yes | 44     | 0.23   |
| Total | 19,343 | 100.00 |

**ga005\_s3: Pension Voucher Receive**

|       | Freq.  | %      |
|-------|--------|--------|
| 0 No  | 19,082 | 98.65  |
| 3 Yes | 261    | 1.35   |
| Total | 19,343 | 100.00 |

**ga005\_s4: Pension Subsidy for the Oldest Old Receive**

|       | Freq.  | %      |
|-------|--------|--------|
| 0 No  | 18,171 | 93.94  |
| 4 Yes | 1,172  | 6.06   |
| Total | 19,343 | 100.00 |

**ga005\_s5: Workers' Industrial Accident Compensation Receive**

|       | Freq.  | %      |
|-------|--------|--------|
| 0 No  | 19,264 | 99.59  |
| 5 Yes | 79     | 0.41   |
| Total | 19,343 | 100.00 |

**ga005\_s6: Elderly Family Planning Subsidy Receive**

|       | Freq.  | %      |
|-------|--------|--------|
| 0 No  | 18,614 | 96.23  |
| 6 Yes | 729    | 3.77   |
| Total | 19,343 | 100.00 |

**ga005\_s7: Medical Aid Receive**

|       | Freq.  | %      |
|-------|--------|--------|
| 0 No  | 19,116 | 98.83  |
| 7 Yes | 227    | 1.17   |
| Total | 19,343 | 100.00 |

**ga005\_s8: Other Government Subsidy Receive**

|       | Freq.  | %      |
|-------|--------|--------|
| 0 No  | 18,452 | 95.39  |
| 8 Yes | 891    | 4.61   |
| Total | 19,343 | 100.00 |

**ga005\_s9: Other Income Source Receive**

|       | Freq.  | %      |
|-------|--------|--------|
| 0 No  | 19,234 | 99.44  |
| 9 Yes | 109    | 0.56   |
| Total | 19,343 | 100.00 |

**ga005\_s10: None of the Above Receive**

|        | Freq.  | %      |
|--------|--------|--------|
| 0 No   | 10,911 | 56.41  |
| 10 Yes | 8,432  | 43.59  |
| Total  | 19,343 | 100.00 |

**ga005\_1: Pension Amount Receive**

| Mean      | SD        | Min   | Max        | Obs   |
|-----------|-----------|-------|------------|-------|
| 12,374.47 | 19,223.88 | -1.00 | 567,200.00 | 9,741 |

**ga005\_1\_min: Min Bracket of ga005\_1**

| Mean     | SD       | Min   | Max       | Obs |
|----------|----------|-------|-----------|-----|
| 1,634.54 | 4,010.10 | -1.00 | 25,000.00 | 315 |

**ga005\_1\_max: Max Bracket of ga005\_1**

| Mean     | SD       | Min   | Max       | Obs |
|----------|----------|-------|-----------|-----|
| 2,741.09 | 4,403.06 | -1.00 | 25,000.00 | 348 |

**ga005\_2: Unemployment Compensation Amount Receive**

| Mean     | SD       | Min   | Max       | Obs |
|----------|----------|-------|-----------|-----|
| 4,180.11 | 6,314.90 | -1.00 | 27,600.00 | 44  |

**ga005\_3: Pension Voucher Amount Receive**

| Mean     | SD       | Min   | Max       | Obs |
|----------|----------|-------|-----------|-----|
| 2,242.27 | 5,867.91 | -1.00 | 45,000.00 | 261 |

**ga005\_4: Pension Subsidy for the Oldest Old Amount Receive**

| Mean   | SD     | Min   | Max      | Obs   |
|--------|--------|-------|----------|-------|
| 924.99 | 838.35 | -1.00 | 7,600.00 | 1,172 |

**ga005\_5: Workers' Industrial Accident Compensation Amount Receive**

| Mean     | SD       | Min   | Max       | Obs |
|----------|----------|-------|-----------|-----|
| 3,351.54 | 6,842.90 | -1.00 | 37,000.00 | 79  |

**ga005\_6: Elderly Family Planning Subsidy Amount Receive**

| Mean     | SD       | Min   | Max       | Obs |
|----------|----------|-------|-----------|-----|
| 1,106.99 | 2,021.87 | -1.00 | 50,000.00 | 729 |

**ga005\_7: Medical Aid Amount Receive**

| Mean     | SD        | Min   | Max        | Obs |
|----------|-----------|-------|------------|-----|
| 3,780.04 | 18,184.31 | -1.00 | 260,000.00 | 227 |

**ga005\_8: Other Government Subsidy Amount Receive**

| Mean     | SD       | Min   | Max       | Obs |
|----------|----------|-------|-----------|-----|
| 2,669.59 | 4,488.35 | -1.00 | 45,600.00 | 891 |

**ga005\_9: Other Income Source Amount Receive**

| Mean     | SD       | Min   | Max       | Obs |
|----------|----------|-------|-----------|-----|
| 2,952.93 | 6,888.50 | -1.00 | 40,000.00 | 109 |

**ga006: Impact of COVID on Wage**

|            | Freq.  | %      |
|------------|--------|--------|
| 1 Decrease | 3,711  | 19.19  |
| 2 Increase | 81     | 0.42   |
| 3 Unchange | 15,550 | 80.39  |
| Total      | 19,342 | 100.00 |

**ga006\_1: Amount Decreased**

| Mean     | SD        | Min   | Max        | Obs   |
|----------|-----------|-------|------------|-------|
| 8,564.39 | 21,305.38 | -1.00 | 600,000.00 | 3,711 |

**ga006\_1\_max: Max Bracket of ga006\_1**

| Mean     | SD       | Min   | Max       | Obs |
|----------|----------|-------|-----------|-----|
| 4,774.13 | 5,561.06 | -1.00 | 20,000.00 | 266 |

**ga006\_1\_min: Min Bracket of ga006\_1**

| Mean     | SD       | Min   | Max       | Obs |
|----------|----------|-------|-----------|-----|
| 4,565.24 | 5,665.60 | -1.00 | 20,000.00 | 267 |

**ga006\_2: Amount Increased**

| Mean     | SD       | Min   | Max       | Obs |
|----------|----------|-------|-----------|-----|
| 4,524.10 | 8,057.95 | -1.00 | 60,000.00 | 81  |

**ga006\_2\_max: Max Bracket of ga006\_2**

| Mean     | SD       | Min   | Max       | Obs |
|----------|----------|-------|-----------|-----|
| 2,999.83 | 3,633.35 | -1.00 | 10,000.00 | 6   |

**ga006\_2\_min: Min Bracket of ga006\_2**

| Mean     | SD       | Min   | Max       | Obs |
|----------|----------|-------|-----------|-----|
| 4,499.67 | 7,713.86 | -1.00 | 20,000.00 | 6   |

**ga007: Make a Will**

|       | Freq.  | %      |
|-------|--------|--------|
| 1 Yes | 88     | 0.45   |
| 2 No  | 19,253 | 99.55  |
| Total | 19,341 | 100.00 |

**ga008: Estate Planning**

|                       | Freq.  | %      |
|-----------------------|--------|--------|
| 1 Have Considered     | 1,339  | 6.95   |
| 2 Have not Considered | 15,078 | 78.32  |
| 3 No Asset            | 2,836  | 14.73  |
| Total                 | 19,253 | 100.00 |

**ga017: Estate Planning Follows Law of Succession**

|                      | Freq. | %      |
|----------------------|-------|--------|
| 1 Yes                | 298   | 22.26  |
| 2 No, I Have My Plan | 1,041 | 77.74  |
| Total                | 1,339 | 100.00 |

**ga009\_s1: Estate Planning: Spouse**

|       | Freq. | %     |
|-------|-------|-------|
| 0 No  | 1,001 | 88.66 |
| 1 Yes | 128   | 11.34 |

|       |       |        |
|-------|-------|--------|
| Total | 1,129 | 100.00 |
|-------|-------|--------|

**ga009\_s2: Estate Planning: Children/Sons-in-law/Daughters-in-law**

|       | Freq. | %      |
|-------|-------|--------|
| 0 No  | 134   | 11.87  |
| 2 Yes | 995   | 88.13  |
| Total | 1,129 | 100.00 |

**ga009\_s3: Estate Planning: Sibling**

|       | Freq. | %      |
|-------|-------|--------|
| 0 No  | 1,124 | 99.56  |
| 3 Yes | 5     | 0.44   |
| Total | 1,129 | 100.00 |

**ga009\_s4: Estate Planning: Other Relatives**

|       | Freq. | %      |
|-------|-------|--------|
| 0 No  | 1,122 | 99.38  |
| 4 Yes | 7     | 0.62   |
| Total | 1,129 | 100.00 |

**ga009\_s5: Estate Planning: Parents/Parents-in-law**

|       | Freq. | %      |
|-------|-------|--------|
| 0 No  | 1,124 | 99.56  |
| 5 Yes | 5     | 0.44   |
| Total | 1,129 | 100.00 |

**ga009\_s6: Estate Planning: Grandchildren**

|       | Freq. | %      |
|-------|-------|--------|
| 0 No  | 1,048 | 92.83  |
| 6 Yes | 81    | 7.17   |
| Total | 1,129 | 100.00 |

**ga009\_s7: Estate Planning: Friends**

|       | Freq. | %      |
|-------|-------|--------|
| 0 No  | 1,129 | 100.00 |
| Total | 1,129 | 100.00 |

**ga009\_s8: Estate Planning: Charity**

|       | Freq. | %     |
|-------|-------|-------|
| 0 No  | 1,128 | 99.91 |
| 8 Yes | 1     | 0.09  |

|       |       |        |
|-------|-------|--------|
| Total | 1,129 | 100.00 |
|-------|-------|--------|

#### ga009\_s9: Estate Planning: Others

|       | Freq. | %      |
|-------|-------|--------|
| 0 No  | 1,106 | 97.96  |
| 9 Yes | 23    | 2.04   |
| Total | 1,129 | 100.00 |

#### ga009\_s10: Estate Planning: No Arrangement

|        | Freq. | %      |
|--------|-------|--------|
| 0 No   | 1,105 | 97.87  |
| 10 Yes | 24    | 2.13   |
| Total  | 1,129 | 100.00 |

#### ga009\_s997: Estate Planning: Do not Know

|       | Freq. | %      |
|-------|-------|--------|
| 0 No  | 1,129 | 100.00 |
| Total | 1,129 | 100.00 |

#### ga009\_1: Estate Planning: Spouse(%)

| Mean  | SD    | Min   | Max    | Obs |
|-------|-------|-------|--------|-----|
| 56.77 | 37.34 | -1.00 | 100.00 | 130 |

#### ga009\_3: Estate Planning: Sibling(%)

| Mean  | SD    | Min   | Max    | Obs |
|-------|-------|-------|--------|-----|
| 66.00 | 46.69 | 10.00 | 100.00 | 5   |

#### ga009\_4: Estate Planning: Other Relatives(%)

| Mean  | SD    | Min   | Max    | Obs |
|-------|-------|-------|--------|-----|
| 87.14 | 34.02 | 10.00 | 100.00 | 7   |

#### ga009\_5: Estate Planning: Parents/Parents-in-law(%)

| Mean  | SD    | Min   | Max    | Obs |
|-------|-------|-------|--------|-----|
| 26.40 | 41.91 | -1.00 | 100.00 | 5   |

#### ga009\_7: Estate Planning: Friends(%)

|                 |
|-----------------|
| No Observations |
|-----------------|

**ga009\_8: Estate Planning: Charity(%)**

| Mean  | SD | Min   | Max   | Obs |
|-------|----|-------|-------|-----|
| 50.00 | .  | 50.00 | 50.00 | 1   |

**ga009\_9: Estate Planning: Others(%)**

| Mean  | SD    | Min   | Max    | Obs |
|-------|-------|-------|--------|-----|
| 59.96 | 45.06 | -1.00 | 100.00 | 23  |

**ga010\_s1: Estate Planning: Child[1]/'s Spouse**

|       | Freq. | %      |
|-------|-------|--------|
| 0 No  | 211   | 21.21  |
| 1 Yes | 784   | 78.79  |
| Total | 995   | 100.00 |

**ga010\_s2: Estate Planning: Child[2]/'s Spouse**

|       | Freq. | %      |
|-------|-------|--------|
| 0 No  | 576   | 57.89  |
| 2 Yes | 419   | 42.11  |
| Total | 995   | 100.00 |

**ga010\_s3: Estate Planning: Child[3]/'s Spouse**

|       | Freq. | %      |
|-------|-------|--------|
| 0 No  | 820   | 82.41  |
| 3 Yes | 175   | 17.59  |
| Total | 995   | 100.00 |

**ga010\_s4: Estate Planning: Child[4]/'s Spouse**

|       | Freq. | %      |
|-------|-------|--------|
| 0 No  | 917   | 92.16  |
| 4 Yes | 78    | 7.84   |
| Total | 995   | 100.00 |

**ga010\_s5: Estate Planning: Child[5]/'s Spouse**

|       | Freq. | %      |
|-------|-------|--------|
| 0 No  | 974   | 97.89  |
| 5 Yes | 21    | 2.11   |
| Total | 995   | 100.00 |

**ga010\_s6: Estate Planning: Child[6]/'s Spouse**

|       | Freq. | %      |
|-------|-------|--------|
| 0 No  | 984   | 98.89  |
| 6 Yes | 11    | 1.11   |
| Total | 995   | 100.00 |

**ga010\_s7: Estate Planning: Child[7]/'s Spouse**

|       | Freq. | %      |
|-------|-------|--------|
| 0 No  | 993   | 99.80  |
| 7 Yes | 2     | 0.20   |
| Total | 995   | 100.00 |

**ga010\_s8: Estate Planning: Child[8]/'s Spouse**

|       | Freq. | %      |
|-------|-------|--------|
| 0 No  | 995   | 100.00 |
| Total | 995   | 100.00 |

**ga010\_s9: Estate Planning: Child[9]/'s Spouse**

|       | Freq. | %      |
|-------|-------|--------|
| 0 No  | 995   | 100.00 |
| Total | 995   | 100.00 |

**ga010\_s10: Estate Planning: Child[10]/'s Spouse**

|       | Freq. | %      |
|-------|-------|--------|
| 0 No  | 995   | 100.00 |
| Total | 995   | 100.00 |

**ga010\_s11: Estate Planning: Child[11]/'s Spouse**

|       | Freq. | %      |
|-------|-------|--------|
| 0 No  | 995   | 100.00 |
| Total | 995   | 100.00 |

**ga010\_s12: Estate Planning: Child[12]/'s Spouse**

|       | Freq. | %      |
|-------|-------|--------|
| 0 No  | 995   | 100.00 |
| Total | 995   | 100.00 |

**ga010\_s13: Estate Planning: Child[13]/'s Spouse**

|       | Freq. | %      |
|-------|-------|--------|
| 0 No  | 995   | 100.00 |
| Total | 995   | 100.00 |



**ga010\_s14:** Estate Planning: Child[14]/'s Spouse

|       | Freq. | %      |
|-------|-------|--------|
| 0 No  | 995   | 100.00 |
| Total | 995   | 100.00 |

**ga010\_s15:** Estate Planning: Child[15]/'s Spouse

|       | Freq. | %      |
|-------|-------|--------|
| 0 No  | 995   | 100.00 |
| Total | 995   | 100.00 |

**ga010\_s16:** Estate Planning: Child[16]/'s Spouse

|       | Freq. | %      |
|-------|-------|--------|
| 0 No  | 995   | 100.00 |
| Total | 995   | 100.00 |

**ga010\_s17:** Estate Planning: Child[17]/'s Spouse

|       | Freq. | %      |
|-------|-------|--------|
| 0 No  | 995   | 100.00 |
| Total | 995   | 100.00 |

**ga010\_s18:** Estate Planning: Child[18]/'s Spouse

|       | Freq. | %      |
|-------|-------|--------|
| 0 No  | 995   | 100.00 |
| Total | 995   | 100.00 |

**ga010\_s19:** Estate Planning: Child[19]/'s Spouse

|       | Freq. | %      |
|-------|-------|--------|
| 0 No  | 995   | 100.00 |
| Total | 995   | 100.00 |

**ga010\_s20:** Estate Planning: Child[20]/'s Spouse

|       | Freq. | %      |
|-------|-------|--------|
| 0 No  | 995   | 100.00 |
| Total | 995   | 100.00 |

**ga010\_s21:** Estate Planning: Child[21]/'s Spouse

|       | Freq. | %      |
|-------|-------|--------|
| 0 No  | 995   | 100.00 |
| Total | 995   | 100.00 |

**ga010\_s22: Estate Planning: Child[22]/s Spouse**

|       | Freq. | %      |
|-------|-------|--------|
| 0 No  | 995   | 100.00 |
| Total | 995   | 100.00 |

**ga010\_s23: Estate Planning: Child[23]/s Spouse**

|       | Freq. | %      |
|-------|-------|--------|
| 0 No  | 995   | 100.00 |
| Total | 995   | 100.00 |

**ga010\_s24: Estate Planning: Child[24]/s Spouse**

|       | Freq. | %      |
|-------|-------|--------|
| 0 No  | 995   | 100.00 |
| Total | 995   | 100.00 |

**ga010\_s25: Estate Planning: Child[25]/s Spouse**

|       | Freq. | %      |
|-------|-------|--------|
| 0 No  | 995   | 100.00 |
| Total | 995   | 100.00 |

**ga010\_s26: Estate Planning: Other Child[26]/s Spouse**

|        | Freq. | %      |
|--------|-------|--------|
| 0 No   | 977   | 98.19  |
| 26 Yes | 18    | 1.81   |
| Total  | 995   | 100.00 |

**ga010\_s27: Estate Planning: Other Child[27]/s Spouse**

|        | Freq. | %      |
|--------|-------|--------|
| 0 No   | 989   | 99.40  |
| 27 Yes | 6     | 0.60   |
| Total  | 995   | 100.00 |

**ga010\_s28: Estate Planning: Other Child[28]/s Spouse**

|        | Freq. | %      |
|--------|-------|--------|
| 0 No   | 994   | 99.90  |
| 28 Yes | 1     | 0.10   |
| Total  | 995   | 100.00 |

**ga010\_s29: Estate Planning: Other Child[29]/s Spouse**

|        | Freq. | %      |
|--------|-------|--------|
| 0 No   | 994   | 99.90  |
| 29 Yes | 1     | 0.10   |
| Total  | 995   | 100.00 |

**ga010\_s30:** Estate Planning: Other Child[30]/'s Spouse

|        | Freq. | %      |
|--------|-------|--------|
| 0 No   | 994   | 99.90  |
| 30 Yes | 1     | 0.10   |
| Total  | 995   | 100.00 |

**ga010\_s31:** Estate Planning: Other Child[31]/'s Spouse

|       | Freq. | %      |
|-------|-------|--------|
| 0 No  | 995   | 100.00 |
| Total | 995   | 100.00 |

**ga010\_s32:** Estate Planning: Other Child[32]/'s Spouse

|       | Freq. | %      |
|-------|-------|--------|
| 0 No  | 995   | 100.00 |
| Total | 995   | 100.00 |

**ga010\_s33:** Estate Planning: Other Child[33]/'s Spouse

|       | Freq. | %      |
|-------|-------|--------|
| 0 No  | 995   | 100.00 |
| Total | 995   | 100.00 |

**ga010\_s34:** Estate Planning: Other Child[34]/'s Spouse

|       | Freq. | %      |
|-------|-------|--------|
| 0 No  | 995   | 100.00 |
| Total | 995   | 100.00 |

**ga010\_s35:** Estate Planning: Other Child[35]/'s Spouse

|       | Freq. | %      |
|-------|-------|--------|
| 0 No  | 995   | 100.00 |
| Total | 995   | 100.00 |

**ga011\_1\_:** Estate Planning: Child[1]/'s Spouse(%)

| Mean  | SD    | Min   | Max    | Obs |
|-------|-------|-------|--------|-----|
| 71.69 | 33.56 | -1.00 | 100.00 | 784 |

**ga011\_2\_**: Estate Planning: Child[2]/'s Spouse(%)

| Mean  | SD    | Min   | Max    | Obs |
|-------|-------|-------|--------|-----|
| 50.86 | 30.86 | -1.00 | 100.00 | 419 |

**ga011\_3\_**: Estate Planning: Child[3]/'s Spouse(%)

| Mean  | SD    | Min   | Max    | Obs |
|-------|-------|-------|--------|-----|
| 42.61 | 32.25 | -1.00 | 100.00 | 175 |

**ga011\_4\_**: Estate Planning: Child[4]/'s Spouse(%)

| Mean  | SD    | Min   | Max    | Obs |
|-------|-------|-------|--------|-----|
| 41.87 | 35.08 | -1.00 | 100.00 | 78  |

**ga011\_5\_**: Estate Planning: Child[5]/'s Spouse(%)

| Mean  | SD    | Min   | Max    | Obs |
|-------|-------|-------|--------|-----|
| 29.20 | 23.26 | -1.00 | 100.00 | 21  |

**ga011\_6\_**: Estate Planning: Child[6]/'s Spouse(%)

| Mean  | SD    | Min  | Max    | Obs |
|-------|-------|------|--------|-----|
| 37.76 | 27.52 | 0.10 | 100.00 | 11  |

**ga011\_7\_**: Estate Planning: Child[7]/'s Spouse(%)

| Mean   | SD   | Min    | Max    | Obs |
|--------|------|--------|--------|-----|
| 100.00 | 0.00 | 100.00 | 100.00 | 2   |

**ga011\_8\_**: Estate Planning: Child[8]/'s Spouse(%)

|                 |  |  |  |  |
|-----------------|--|--|--|--|
| No Observations |  |  |  |  |
|-----------------|--|--|--|--|

**ga011\_9\_**: Estate Planning: Child[9]/'s Spouse(%)

|                 |  |  |  |  |
|-----------------|--|--|--|--|
| No Observations |  |  |  |  |
|-----------------|--|--|--|--|

**ga011\_10\_**: Estate Planning: Child[10]/'s Spouse(%)

|                 |  |  |  |  |
|-----------------|--|--|--|--|
| No Observations |  |  |  |  |
|-----------------|--|--|--|--|

**ga011\_11\_**: Estate Planning: Child[11]/'s Spouse(%)

|                 |  |  |  |  |
|-----------------|--|--|--|--|
| No Observations |  |  |  |  |
|-----------------|--|--|--|--|

ga011\_12\_: Estate Planning: Child[12]/'s Spouse(%)

No Observations

ga011\_13\_: Estate Planning: Child[13]/'s Spouse(%)

No Observations

ga011\_14\_: Estate Planning: Child[14]/'s Spouse(%)

No Observations

ga011\_15\_: Estate Planning: Child[15]/'s Spouse(%)

No Observations

ga011\_16\_: Estate Planning: Child[16]/'s Spouse(%)

No Observations

ga011\_17\_: Estate Planning: Child[17]/'s Spouse(%)

No Observations

ga011\_18\_: Estate Planning: Child[18]/'s Spouse(%)

No Observations

ga011\_19\_: Estate Planning: Child[19]/'s Spouse(%)

No Observations

ga011\_20\_: Estate Planning: Child[20]/'s Spouse(%)

No Observations

ga011\_21\_: Estate Planning: Child[21]/'s Spouse(%)

No Observations

ga011\_22\_: Estate Planning: Child[22]/'s Spouse(%)

No Observations

ga011\_23\_: Estate Planning: Child[23]/'s Spouse(%)

No Observations

**ga011\_24\_**: Estate Planning: Child[24]/'s Spouse(%)

---

No Observations

---

**ga011\_25\_**: Estate Planning: Child[25]/'s Spouse(%)

---

No Observations

---

**ga011\_26\_**: Estate Planning: Other Child[26]/'s Spouse(%)

| Mean  | SD    | Min   | Max    | Obs |
|-------|-------|-------|--------|-----|
| 64.00 | 28.06 | 20.00 | 100.00 | 18  |

**ga011\_27\_**: Estate Planning: Other Child[27]/'s Spouse(%)

| Mean  | SD    | Min   | Max   | Obs |
|-------|-------|-------|-------|-----|
| 40.83 | 14.29 | 20.00 | 50.00 | 6   |

**ga011\_28\_**: Estate Planning: Other Child[28]/'s Spouse(%)

| Mean  | SD | Min   | Max   | Obs |
|-------|----|-------|-------|-----|
| 20.00 | .  | 20.00 | 20.00 | 1   |

**ga011\_29\_**: Estate Planning: Other Child[29]/'s Spouse(%)

| Mean  | SD | Min   | Max   | Obs |
|-------|----|-------|-------|-----|
| 20.00 | .  | 20.00 | 20.00 | 1   |

**ga011\_30\_**: Estate Planning: Other Child[30]/'s Spouse(%)

| Mean  | SD | Min   | Max   | Obs |
|-------|----|-------|-------|-----|
| 20.00 | .  | 20.00 | 20.00 | 1   |

**ga011\_31\_**: Estate Planning: Other Child[31]/'s Spouse(%)

---

No Observations

---

**ga011\_32\_**: Estate Planning: Other Child[32]/'s Spouse(%)

---

No Observations

---

**ga011\_33\_**: Estate Planning: Other Child[33]/'s Spouse(%)

---

No Observations

---

**ga011\_34\_**: Estate Planning: Other Child[34]/'s Spouse(%)

---

No Observations

---

**ga011\_35\_:** Estate Planning: Other Child[35]/'s Spouse(%)

---

No Observations

---

**ga014\_s1:** Estate Planning: Child[1]'s Children

|       | Freq. | %      |
|-------|-------|--------|
| 0 No  | 28    | 34.57  |
| 1 Yes | 53    | 65.43  |
| Total | 81    | 100.00 |

**ga014\_s2:** Estate Planning: Child[2]'s Children

|       | Freq. | %      |
|-------|-------|--------|
| 0 No  | 50    | 61.73  |
| 2 Yes | 31    | 38.27  |
| Total | 81    | 100.00 |

**ga014\_s3:** Estate Planning: Child[3]'s Children

|       | Freq. | %      |
|-------|-------|--------|
| 0 No  | 68    | 83.95  |
| 3 Yes | 13    | 16.05  |
| Total | 81    | 100.00 |

**ga014\_s4:** Estate Planning: Child[4]'s Children

|       | Freq. | %      |
|-------|-------|--------|
| 0 No  | 78    | 96.30  |
| 4 Yes | 3     | 3.70   |
| Total | 81    | 100.00 |

**ga014\_s5:** Estate Planning: Child[5]'s Children

|       | Freq. | %      |
|-------|-------|--------|
| 0 No  | 80    | 98.77  |
| 5 Yes | 1     | 1.23   |
| Total | 81    | 100.00 |

**ga014\_s6:** Estate Planning: Child[6]'s Children

|       | Freq. | %      |
|-------|-------|--------|
| 0 No  | 81    | 100.00 |
| Total | 81    | 100.00 |

**ga014\_s7: Estate Planning: Child[7]'s Children**

|       | Freq. | %      |
|-------|-------|--------|
| 0 No  | 81    | 100.00 |
| Total | 81    | 100.00 |

**ga014\_s8: Estate Planning: Child[8]'s Children**

|       | Freq. | %      |
|-------|-------|--------|
| 0 No  | 81    | 100.00 |
| Total | 81    | 100.00 |

**ga014\_s9: Estate Planning: Child[9]'s Children**

|       | Freq. | %      |
|-------|-------|--------|
| 0 No  | 81    | 100.00 |
| Total | 81    | 100.00 |

**ga014\_s10: Estate Planning: Child[10]'s Children**

|       | Freq. | %      |
|-------|-------|--------|
| 0 No  | 81    | 100.00 |
| Total | 81    | 100.00 |

**ga014\_s11: Estate Planning: Child[11]'s Children**

|       | Freq. | %      |
|-------|-------|--------|
| 0 No  | 81    | 100.00 |
| Total | 81    | 100.00 |

**ga014\_s12: Estate Planning: Child[12]'s Children**

|       | Freq. | %      |
|-------|-------|--------|
| 0 No  | 81    | 100.00 |
| Total | 81    | 100.00 |

**ga014\_s13: Estate Planning: Child[13]'s Children**

|       | Freq. | %      |
|-------|-------|--------|
| 0 No  | 81    | 100.00 |
| Total | 81    | 100.00 |

**ga014\_s14: Estate Planning: Child[14]'s Children**

|       | Freq. | %      |
|-------|-------|--------|
| 0 No  | 81    | 100.00 |
| Total | 81    | 100.00 |



**ga014\_s15:** Estate Planning: Child[15]'s Children

|       | Freq. | %      |
|-------|-------|--------|
| 0 No  | 81    | 100.00 |
| Total | 81    | 100.00 |

**ga014\_s16:** Estate Planning: Child[16]'s Children

|       | Freq. | %      |
|-------|-------|--------|
| 0 No  | 81    | 100.00 |
| Total | 81    | 100.00 |

**ga014\_s17:** Estate Planning: Child[17]'s Children

|       | Freq. | %      |
|-------|-------|--------|
| 0 No  | 81    | 100.00 |
| Total | 81    | 100.00 |

**ga014\_s18:** Estate Planning: Child[18]'s Children

|       | Freq. | %      |
|-------|-------|--------|
| 0 No  | 81    | 100.00 |
| Total | 81    | 100.00 |

**ga014\_s19:** Estate Planning: Child[19]'s Children

|       | Freq. | %      |
|-------|-------|--------|
| 0 No  | 81    | 100.00 |
| Total | 81    | 100.00 |

**ga014\_s20:** Estate Planning: Child[20]'s Children

|       | Freq. | %      |
|-------|-------|--------|
| 0 No  | 81    | 100.00 |
| Total | 81    | 100.00 |

**ga014\_s21:** Estate Planning: Child[21]'s Children

|       | Freq. | %      |
|-------|-------|--------|
| 0 No  | 81    | 100.00 |
| Total | 81    | 100.00 |

**ga014\_s22:** Estate Planning: Child[22]'s Children

|       | Freq. | %      |
|-------|-------|--------|
| 0 No  | 81    | 100.00 |
| Total | 81    | 100.00 |

**ga014\_s23:** Estate Planning: Child[23]'s Children

|       | Freq. | %      |
|-------|-------|--------|
| 0 No  | 81    | 100.00 |
| Total | 81    | 100.00 |

**ga014\_s24:** Estate Planning: Child[24]'s Children

|       | Freq. | %      |
|-------|-------|--------|
| 0 No  | 81    | 100.00 |
| Total | 81    | 100.00 |

**ga014\_s25:** Estate Planning: Child[25]'s Children

|       | Freq. | %      |
|-------|-------|--------|
| 0 No  | 81    | 100.00 |
| Total | 81    | 100.00 |

**ga014\_s26:** Estate Planning: Other Child[26]'s Children

|        | Freq. | %      |
|--------|-------|--------|
| 0 No   | 68    | 83.95  |
| 26 Yes | 13    | 16.05  |
| Total  | 81    | 100.00 |

**ga014\_s27:** Estate Planning: Other Child[27]'s Children

|       | Freq. | %      |
|-------|-------|--------|
| 0 No  | 81    | 100.00 |
| Total | 81    | 100.00 |

**ga014\_s28:** Estate Planning: Other Child[28]'s Children

|       | Freq. | %      |
|-------|-------|--------|
| 0 No  | 81    | 100.00 |
| Total | 81    | 100.00 |

**ga014\_s29:** Estate Planning: Other Child[29]'s Children

|       | Freq. | %      |
|-------|-------|--------|
| 0 No  | 81    | 100.00 |
| Total | 81    | 100.00 |

**ga014\_s30:** Estate Planning: Other Child[30]'s Children

|      | Freq. | %      |
|------|-------|--------|
| 0 No | 81    | 100.00 |

|       |    |        |
|-------|----|--------|
| Total | 81 | 100.00 |
|-------|----|--------|

**ga014\_s31: Estate Planning: Other Child[31]'s Children**

|       | Freq. | %      |
|-------|-------|--------|
| 0 No  | 81    | 100.00 |
| Total | 81    | 100.00 |

**ga014\_s32: Estate Planning: Other Child[32]'s Children**

|       | Freq. | %      |
|-------|-------|--------|
| 0 No  | 81    | 100.00 |
| Total | 81    | 100.00 |

**ga014\_s33: Estate Planning: Other Child[33]'s Children**

|       | Freq. | %      |
|-------|-------|--------|
| 0 No  | 81    | 100.00 |
| Total | 81    | 100.00 |

**ga014\_s34: Estate Planning: Other Child[34]'s Children**

|       | Freq. | %      |
|-------|-------|--------|
| 0 No  | 81    | 100.00 |
| Total | 81    | 100.00 |

**ga014\_s35: Estate Planning: Other Child[35]'s Children**

|       | Freq. | %      |
|-------|-------|--------|
| 0 No  | 81    | 100.00 |
| Total | 81    | 100.00 |

**ga015\_1\_: Estate Planning: Child[1]'s Children(%)**

| Mean  | SD    | Min   | Max    | Obs |
|-------|-------|-------|--------|-----|
| 49.86 | 41.85 | -1.00 | 100.00 | 53  |

**ga015\_2\_: Estate Planning: Child[2]'s Children(%)**

| Mean  | SD    | Min   | Max    | Obs |
|-------|-------|-------|--------|-----|
| 38.36 | 39.54 | -1.00 | 100.00 | 31  |

**ga015\_3\_: Estate Planning: Child[3]'s Children(%)**

| Mean | SD    | Min   | Max   | Obs |
|------|-------|-------|-------|-----|
| 7.25 | 12.47 | -1.00 | 33.30 | 13  |

**ga015\_4\_**: Estate Planning: Child[4]'s Children(%)

| Mean  | SD    | Min   | Max    | Obs |
|-------|-------|-------|--------|-----|
| 39.67 | 53.29 | -1.00 | 100.00 | 3   |

**ga015\_5\_**: Estate Planning: Child[5]'s Children(%)

| Mean   | SD | Min    | Max    | Obs |
|--------|----|--------|--------|-----|
| 100.00 | .  | 100.00 | 100.00 | 1   |

**ga015\_6\_**: Estate Planning: Child[6]'s Children(%)

|                 |  |  |  |  |
|-----------------|--|--|--|--|
| No Observations |  |  |  |  |
|-----------------|--|--|--|--|

**ga015\_7\_**: Estate Planning: Child[7]'s Children(%)

|                 |  |  |  |  |
|-----------------|--|--|--|--|
| No Observations |  |  |  |  |
|-----------------|--|--|--|--|

**ga015\_8\_**: Estate Planning: Child[8]'s Children(%)

|                 |  |  |  |  |
|-----------------|--|--|--|--|
| No Observations |  |  |  |  |
|-----------------|--|--|--|--|

**ga015\_9\_**: Estate Planning: Child[9]'s Children(%)

|                 |  |  |  |  |
|-----------------|--|--|--|--|
| No Observations |  |  |  |  |
|-----------------|--|--|--|--|

**ga015\_10\_**: Estate Planning: Child[10]'s Children(%)

|                 |  |  |  |  |
|-----------------|--|--|--|--|
| No Observations |  |  |  |  |
|-----------------|--|--|--|--|

**ga015\_11\_**: Estate Planning: Child[11]'s Children(%)

|                 |  |  |  |  |
|-----------------|--|--|--|--|
| No Observations |  |  |  |  |
|-----------------|--|--|--|--|

**ga015\_12\_**: Estate Planning: Child[12]'s Children(%)

|                 |  |  |  |  |
|-----------------|--|--|--|--|
| No Observations |  |  |  |  |
|-----------------|--|--|--|--|

**ga015\_13\_**: Estate Planning: Child[13]'s Children(%)

|                 |  |  |  |  |
|-----------------|--|--|--|--|
| No Observations |  |  |  |  |
|-----------------|--|--|--|--|

**ga015\_14\_**: Estate Planning: Child[14]'s Children(%)

|                 |  |  |  |  |
|-----------------|--|--|--|--|
| No Observations |  |  |  |  |
|-----------------|--|--|--|--|

ga015\_15\_: Estate Planning: Child[15]'s Children(%)

No Observations

ga015\_16\_: Estate Planning: Child[16]'s Children(%)

No Observations

ga015\_17\_: Estate Planning: Child[17]'s Children(%)

No Observations

ga015\_18\_: Estate Planning: Child[18]'s Children(%)

No Observations

ga015\_19\_: Estate Planning: Child[19]'s Children(%)

No Observations

ga015\_20\_: Estate Planning: Child[20]'s Children(%)

No Observations

ga015\_21\_: Estate Planning: Child[21]'s Children(%)

No Observations

ga015\_22\_: Estate Planning: Child[22]'s Children(%)

No Observations

ga015\_23\_: Estate Planning: Child[23]'s Children(%)

No Observations

ga015\_24\_: Estate Planning: Child[24]'s Children(%)

No Observations

ga015\_25\_: Estate Planning: Child[25]'s Children(%)

No Observations

ga015\_26\_: Estate Planning: Other Child[26]'s Children(%)

Mean

SD

Min

Max

Obs

|       |       |       |        |    |
|-------|-------|-------|--------|----|
| 83.00 | 31.42 | -1.00 | 100.00 | 13 |
|-------|-------|-------|--------|----|

**ga015\_27\_:** Estate Planning: Other Child[27]'s Children(%)

No Observations

**ga015\_28\_:** Estate Planning: Other Child[28]'s Children(%)

No Observations

**ga015\_29\_:** Estate Planning: Other Child[29]'s Children(%)

No Observations

**ga015\_30\_:** Estate Planning: Other Child[30]'s Children(%)

No Observations

**ga015\_31\_:** Estate Planning: Other Child[31]'s Children(%)

No Observations

**ga015\_32\_:** Estate Planning: Other Child[32]'s Children(%)

No Observations

**ga015\_33\_:** Estate Planning: Other Child[33]'s Children(%)

No Observations

**ga015\_34\_:** Estate Planning: Other Child[34]'s Children(%)

No Observations

**ga015\_35\_:** Estate Planning: Other Child[35]'s Children(%)

No Observations

**ga016:** Actual Allocation Time

|                        | Freq. | %      |
|------------------------|-------|--------|
| 1 The Respondent Died  | 139   | 46.80  |
| 2 The Respondent Alive | 158   | 53.20  |
| Total                  | 297   | 100.00 |

**ga018:** Actual Allocation Time

|                                  | Freq. | %      |
|----------------------------------|-------|--------|
| 1 Both (Respondent&Spouse) Died  | 517   | 45.75  |
| 2 Both (Respondent&Spouse) Alive | 442   | 39.12  |
| 3 One (Respondent/Spouse) Died   | 171   | 15.13  |
| Total                            | 1,130 | 100.00 |

**xproxytext:** Text for Proxy

|                 |
|-----------------|
| No Observations |
|-----------------|

**xga004text:** Text for ga004

|                   |
|-------------------|
| A String Variable |
| Obs: 4,020        |

**xga009text:** Text for ga009

|                   |
|-------------------|
| A String Variable |
| Obs: 88           |

**xchildnum:** Num of Children

| Mean | SD   | Min  | Max   | Obs    |
|------|------|------|-------|--------|
| 2.49 | 1.31 | 0.00 | 10.00 | 19,349 |

**versionID:** Version ID

|                   |
|-------------------|
| A String Variable |
| Obs: 19,349       |

*This page intentionally left blank*



---

## COVID Module

---

### ID: Individual ID

| A String Variable |        |
|-------------------|--------|
| Obs:              | 19,383 |

### householdID: Household ID

| A String Variable |        |
|-------------------|--------|
| Obs:              | 19,383 |

### communityID: Community ID

| A String Variable |        |
|-------------------|--------|
| Obs:              | 19,383 |

### va001\_s1: Washing Hands

|       | Freq.  | %      |
|-------|--------|--------|
| 0 No  | 3,927  | 20.27  |
| 1 Yes | 15,449 | 79.73  |
| Total | 19,376 | 100.00 |

### va001\_s2: Using Disinfectant

|       | Freq.  | %      |
|-------|--------|--------|
| 0 No  | 5,310  | 27.41  |
| 2 Yes | 14,066 | 72.59  |
| Total | 19,376 | 100.00 |

### va001\_s3: Avoid Handshaking

|       | Freq.  | %      |
|-------|--------|--------|
| 0 No  | 6,188  | 31.94  |
| 3 Yes | 13,188 | 68.06  |
| Total | 19,376 | 100.00 |

**va001\_s4: Masking**

|       | Freq.  | %      |
|-------|--------|--------|
| 0 No  | 1,994  | 10.29  |
| 4 Yes | 17,382 | 89.71  |
| Total | 19,376 | 100.00 |

**va001\_s5: Avoid Travels**

|       | Freq.  | %      |
|-------|--------|--------|
| 0 No  | 4,771  | 24.62  |
| 5 Yes | 14,605 | 75.38  |
| Total | 19,376 | 100.00 |

**va001\_s6: Avoid Gatherings**

|       | Freq.  | %      |
|-------|--------|--------|
| 0 No  | 3,252  | 16.78  |
| 6 Yes | 16,124 | 83.22  |
| Total | 19,376 | 100.00 |

**va001\_s7: Social Distancing**

|       | Freq.  | %      |
|-------|--------|--------|
| 0 No  | 4,452  | 22.98  |
| 7 Yes | 14,924 | 77.02  |
| Total | 19,376 | 100.00 |

**va001\_s8: Others**

|       | Freq.  | %      |
|-------|--------|--------|
| 0 No  | 16,335 | 84.31  |
| 8 Yes | 3,041  | 15.69  |
| Total | 19,376 | 100.00 |

**va001\_s9: Do not Know About the Pandemic or Preventive Measures**

|       | Freq.  | %      |
|-------|--------|--------|
| 0 No  | 18,728 | 96.66  |
| 9 Yes | 648    | 3.34   |
| Total | 19,376 | 100.00 |

**va002\_s1: Televisions**

|       | Freq.  | %      |
|-------|--------|--------|
| 0 No  | 6,318  | 34.97  |
| 1 Yes | 11,748 | 65.03  |
| Total | 18,066 | 100.00 |

va002\_s2: Newspaper

|       | Freq.  | %      |
|-------|--------|--------|
| 0 No  | 17,446 | 96.57  |
| 2 Yes | 620    | 3.43   |
| Total | 18,066 | 100.00 |

va002\_s3: Internet

|       | Freq.  | %      |
|-------|--------|--------|
| 0 No  | 12,069 | 66.81  |
| 3 Yes | 5,997  | 33.19  |
| Total | 18,066 | 100.00 |

va002\_s4: Radio

|       | Freq.  | %      |
|-------|--------|--------|
| 0 No  | 17,315 | 95.84  |
| 4 Yes | 751    | 4.16   |
| Total | 18,066 | 100.00 |

va002\_s5: Friends, Colleagues, Community

|       | Freq.  | %      |
|-------|--------|--------|
| 0 No  | 8,742  | 48.39  |
| 5 Yes | 9,324  | 51.61  |
| Total | 18,066 | 100.00 |

va002\_s6: Medical practitioners

|       | Freq.  | %      |
|-------|--------|--------|
| 0 No  | 17,140 | 94.87  |
| 6 Yes | 926    | 5.13   |
| Total | 18,066 | 100.00 |

va002\_s7: Village broadcasts

|       | Freq.  | %      |
|-------|--------|--------|
| 0 No  | 13,750 | 76.11  |
| 7 Yes | 4,316  | 23.89  |
| Total | 18,066 | 100.00 |

va002\_s8: Posters

|       | Freq.  | %      |
|-------|--------|--------|
| 0 No  | 16,237 | 89.88  |
| 8 Yes | 1,829  | 10.12  |
| Total | 18,066 | 100.00 |

#### va002\_s9: Others

|       | Freq.  | %      |
|-------|--------|--------|
| 0 No  | 17,443 | 96.55  |
| 9 Yes | 623    | 3.45   |
| Total | 18,066 | 100.00 |

#### va002\_s10: No External Sources

|        | Freq.  | %      |
|--------|--------|--------|
| 0 No   | 17,556 | 97.18  |
| 10 Yes | 510    | 2.82   |
| Total  | 18,066 | 100.00 |

#### va003: Masking During the Pandemic

|                                    | Freq.  | %      |
|------------------------------------|--------|--------|
| Always                             | 14,459 | 74.63  |
| Sometimes                          | 2,513  | 12.97  |
| Never                              | 931    | 4.81   |
| Did not Go Out During the Pandemic | 1,472  | 7.60   |
| Total                              | 19,375 | 100.00 |

#### va004: Masking Nowadays

|               | Freq. | %      |
|---------------|-------|--------|
| Yes           | 210   | 14.27  |
| Still Not     | 586   | 39.81  |
| Do not Go Out | 676   | 45.92  |
| Total         | 1,472 | 100.00 |

#### va005: Masking Nowadays

|                                  | Freq.  | %      |
|----------------------------------|--------|--------|
| Always                           | 7,985  | 44.60  |
| Not After the Pandemic           | 8,848  | 49.42  |
| Never                            | 932    | 5.21   |
| Do not Go Out After the Pandemic | 137    | 0.77   |
| Total                            | 17,902 | 100.00 |

#### va005\_1: For How Long

| Mean | SD   | Min  | Max  | Obs   |
|------|------|------|------|-------|
| 2.23 | 1.15 | 0.00 | 8.00 | 8,645 |

**va006\_s1: Food**

|       | Freq.  | %      |
|-------|--------|--------|
| 0 No  | 15,668 | 80.87  |
| 1 Yes | 3,706  | 19.13  |
| Total | 19,374 | 100.00 |

**va006\_s2: Masks and disinfectants**

|       | Freq.  | %      |
|-------|--------|--------|
| 0 No  | 11,605 | 59.90  |
| 2 Yes | 7,769  | 40.10  |
| Total | 19,374 | 100.00 |

**va006\_s3: None**

|       | Freq.  | %      |
|-------|--------|--------|
| 0 No  | 8,417  | 43.44  |
| 3 Yes | 10,957 | 56.56  |
| Total | 19,374 | 100.00 |

**va007: Attitude Towards Government Interventions**

|                              | Freq.  | %      |
|------------------------------|--------|--------|
| 1 Stricter Than Necessary    | 2,924  | 15.09  |
| 2 Satisfied                  | 14,252 | 73.56  |
| 3 Less Strict Than Necessary | 1,158  | 5.98   |
| 997 Do not Know              | 1,022  | 5.28   |
| 999 Refuse to Answer         | 18     | 0.09   |
| Total                        | 19,374 | 100.00 |

**vb001\_s1: Self**

|       | Freq.  | %      |
|-------|--------|--------|
| 0 No  | 19,372 | 99.99  |
| 1 Yes | 2      | 0.01   |
| Total | 19,374 | 100.00 |

**vb001\_s2: Cohabitant**

|       | Freq.  | %      |
|-------|--------|--------|
| 0 Yes | 19,374 | 100.00 |
| Total | 19,374 | 100.00 |

**vb001\_s3: Other Relatives**

|       | Freq.  | %     |
|-------|--------|-------|
| 0 No  | 19,363 | 99.94 |
| 3 Yes | 11     | 0.06  |

|       |        |        |
|-------|--------|--------|
| Total | 19,374 | 100.00 |
|-------|--------|--------|

**vb001\_s4: Acquaintance**

|       | Freq.  | %      |
|-------|--------|--------|
| 0 No  | 19,327 | 99.76  |
| 4 Yes | 47     | 0.24   |
| Total | 19,374 | 100.00 |

**vb001\_s5: None**

|       | Freq.  | %      |
|-------|--------|--------|
| 0 No  | 127    | 0.66   |
| 5 Yes | 19,247 | 99.34  |
| Total | 19,374 | 100.00 |

**vb001\_s999: Refuse to Answer**

|         | Freq.  | %      |
|---------|--------|--------|
| 0 No    | 19,304 | 99.64  |
| 999 Yes | 70     | 0.36   |
| Total   | 19,374 | 100.00 |

**vb002\_s1: Cohabitant**

|       | Freq. | %      |
|-------|-------|--------|
| 0 Yes | 57    | 100.00 |
| Total | 57    | 100.00 |

**vb002\_s2: Other Relatives**

|       | Freq. | %      |
|-------|-------|--------|
| 0 No  | 56    | 98.25  |
| 2 Yes | 1     | 1.75   |
| Total | 57    | 100.00 |

**vb002\_s3: Acquaintance**

|       | Freq. | %      |
|-------|-------|--------|
| 0 No  | 47    | 82.46  |
| 3 Yes | 10    | 17.54  |
| Total | 57    | 100.00 |

**vb002\_s4: None**

|       | Freq. | %      |
|-------|-------|--------|
| 0 No  | 12    | 21.05  |
| 4 Yes | 45    | 78.95  |
| Total | 57    | 100.00 |

**vb002\_s999: Refuse to Answer**

|         | Freq. | %      |
|---------|-------|--------|
| 0 No    | 55    | 96.49  |
| 999 Yes | 2     | 3.51   |
| Total   | 57    | 100.00 |

**vb004: Days of Hospital Stay for COVID treatment**

| Mean | SD   | Min  | Max  | Obs |
|------|------|------|------|-----|
| 0.00 | 0.00 | 0.00 | 0.00 | 2   |

**vb005\_s1: Travels**

|       | Freq.  | %      |
|-------|--------|--------|
| 0 No  | 19,205 | 99.13  |
| 1 Yes | 169    | 0.87   |
| Total | 19,374 | 100.00 |

**vb005\_s2: Close contact of COVID cases**

|       | Freq.  | %      |
|-------|--------|--------|
| 0 No  | 19,355 | 99.90  |
| 2 Yes | 19     | 0.10   |
| Total | 19,374 | 100.00 |

**vb005\_s3: Building Lockdown**

|       | Freq.  | %      |
|-------|--------|--------|
| 0 No  | 19,234 | 99.28  |
| 3 Yes | 140    | 0.72   |
| Total | 19,374 | 100.00 |

**vb005\_s4: After Going to Hospital**

|       | Freq.  | %      |
|-------|--------|--------|
| 0 No  | 19,335 | 99.80  |
| 4 Yes | 39     | 0.20   |
| Total | 19,374 | 100.00 |

**vb005\_s5: Tested Positive**

|       | Freq.  | %      |
|-------|--------|--------|
| 0 Yes | 19,374 | 100.00 |
| Total | 19,374 | 100.00 |

**vb005\_s6: No Quarantine Experience**

|       | Freq.  | %      |
|-------|--------|--------|
| 0 No  | 425    | 2.19   |
| 6 Yes | 18,949 | 97.81  |
| Total | 19,374 | 100.00 |

**vb005\_s997: Do not Know**

|         | Freq.  | %      |
|---------|--------|--------|
| 0 No    | 19,308 | 99.66  |
| 997 Yes | 66     | 0.34   |
| Total   | 19,374 | 100.00 |

**vb005\_s999: Refuse to Answer**

|       | Freq.  | %      |
|-------|--------|--------|
| 0 Yes | 19,374 | 100.00 |
| Total | 19,374 | 100.00 |

**vb008: Days of Quarantine**

| Mean  | SD    | Min  | Max    | Obs |
|-------|-------|------|--------|-----|
| 24.28 | 23.85 | 1.00 | 210.00 | 353 |

**vb009\_s1: Hospital**

|       | Freq. | %      |
|-------|-------|--------|
| 0 No  | 344   | 95.82  |
| 1 Yes | 15    | 4.18   |
| Total | 359   | 100.00 |

**vb009\_s2: Hotel**

|       | Freq. | %      |
|-------|-------|--------|
| 0 No  | 336   | 93.59  |
| 2 Yes | 23    | 6.41   |
| Total | 359   | 100.00 |

**vb009\_s3: Own Residence**

|       | Freq. | %      |
|-------|-------|--------|
| 0 No  | 64    | 17.83  |
| 3 Yes | 295   | 82.17  |
| Total | 359   | 100.00 |

**vb009\_s4: Others**

|  | Freq. | % |
|--|-------|---|
|--|-------|---|



|       |     |        |
|-------|-----|--------|
| 0 No  | 327 | 91.09  |
| 4 Yes | 32  | 8.91   |
| Total | 359 | 100.00 |

**vb009\_s997: Do not Know**

|         | Freq. | %      |
|---------|-------|--------|
| 0 No    | 357   | 99.44  |
| 997 Yes | 2     | 0.56   |
| Total   | 359   | 100.00 |

**vb009\_s999: Refuse to Answer**

|       | Freq. | %      |
|-------|-------|--------|
| 0 Yes | 359   | 100.00 |
| Total | 359   | 100.00 |

**vb010: Payment of Quarantine**

| Mean  | SD    | Min  | Max    | Obs |
|-------|-------|------|--------|-----|
| 31.74 | 94.32 | 0.00 | 350.00 | 23  |

**vb011: Quarantined with Someone Else in Same Place**

|                 | Freq. | %      |
|-----------------|-------|--------|
| 1 Yes           | 260   | 72.42  |
| 2 No            | 97    | 27.02  |
| 997 Do not Know | 2     | 0.56   |
| Total           | 359   | 100.00 |

**vb012: COVID Tested**

|                      | Freq.  | %      |
|----------------------|--------|--------|
| 1 Yes                | 1,042  | 5.38   |
| 2 No                 | 18,244 | 94.17  |
| 997 Do not Know      | 87     | 0.45   |
| 999 Refuse to Answer | 1      | 0.01   |
| Total                | 19,374 | 100.00 |

**vb012\_1: Year of Last Test**

| Mean     | SD   | Min      | Max      | Obs   |
|----------|------|----------|----------|-------|
| 2,020.00 | 0.00 | 2,020.00 | 2,020.00 | 1,042 |

**vb012\_2: Month**

| Mean | SD   | Min  | Max  | Obs   |
|------|------|------|------|-------|
| 5.44 | 1.83 | 1.00 | 8.00 | 1,014 |

**vc000: Days of Longest Self-Isolation During the Pandemic**

| Mean  | SD    | Min  | Max    | Obs    |
|-------|-------|------|--------|--------|
| 19.40 | 28.73 | 0.00 | 240.00 | 19,020 |

**vc001: Residence During the Lunar New Year Outbreak**

|                                                         | Freq.  | %      |
|---------------------------------------------------------|--------|--------|
| 1 Same as the Residence                                 | 17,405 | 89.85  |
| 2 Another Neighborhood but Same County as the Residence | 710    | 3.67   |
| 3 Other Domestic Location                               | 1,234  | 6.37   |
| 4 Abroad                                                | 16     | 0.08   |
| 999 Refuse to Answer                                    | 7      | 0.04   |
| Total                                                   | 19,372 | 100.00 |

**vc002: Times of Going Outdoors During the Lunar New Year Outbreak**

|                    | Freq.  | %      |
|--------------------|--------|--------|
| Increased Greatly  | 111    | 0.57   |
| Increased Slightly | 66     | 0.34   |
| Not Changed        | 6,558  | 33.85  |
| Decreased Slightly | 1,747  | 9.02   |
| Decreased Greatly  | 10,890 | 56.22  |
| Total              | 19,372 | 100.00 |

**vc003: Time Spent Outdoors During the Lunar New Year Outbreak**

|                    | Freq.  | %      |
|--------------------|--------|--------|
| Increased Greatly  | 158    | 0.82   |
| Increased Slightly | 94     | 0.49   |
| Not Changed        | 6,735  | 34.77  |
| Decreased Slightly | 1,848  | 9.54   |
| Decreased Greatly  | 10,536 | 54.39  |
| Total              | 19,371 | 100.00 |

**vc004: Intense Activities During the Lunar New Year Outbreak**

|                    | Freq.  | %      |
|--------------------|--------|--------|
| Increased Greatly  | 132    | 0.68   |
| Increased Slightly | 128    | 0.66   |
| Not Changed        | 13,371 | 69.03  |
| Decreased Slightly | 1,238  | 6.39   |
| Decreased Greatly  | 4,502  | 23.24  |
| Total              | 19,371 | 100.00 |

**vc005: Moderate Activities During the Lunar New Year Outbreak**

|                    | Freq.  | %     |
|--------------------|--------|-------|
| Increased Greatly  | 438    | 2.26  |
| Increased Slightly | 390    | 2.01  |
| Not Changed        | 13,593 | 70.17 |

|                    |        |        |
|--------------------|--------|--------|
| Decreased Slightly | 1,417  | 7.32   |
| Decreased Greatly  | 3,533  | 18.24  |
| Total              | 19,371 | 100.00 |

**vc006: Light Activities During the Lunar New Year Outbreak**

|                    | Freq.  | %      |
|--------------------|--------|--------|
| Increased Greatly  | 275    | 1.42   |
| Increased Slightly | 317    | 1.64   |
| Not Changed        | 9,717  | 50.16  |
| Decreased Slightly | 2,373  | 12.25  |
| Decreased Greatly  | 6,689  | 34.53  |
| Total              | 19,371 | 100.00 |

**vc007: Visiting Others During the Lunar New Year Outbreak**

|                               | Freq.  | %      |
|-------------------------------|--------|--------|
| Increased Greatly             | 52     | 0.27   |
| Increased Slightly            | 39     | 0.20   |
| Not Changed                   | 3,570  | 18.43  |
| Decreased Slightly            | 1,464  | 7.56   |
| Decreased Greatly             | 9,104  | 47.00  |
| Would not Visit Others Anyway | 5,141  | 26.54  |
| Total                         | 19,370 | 100.00 |

**vc008: Playing Mahjong and Cards During the Lunar New Year Outbreak**

|                       | Freq.  | %      |
|-----------------------|--------|--------|
| Increased Greatly     | 64     | 0.33   |
| Increased Slightly    | 66     | 0.34   |
| Not Changed           | 1,232  | 6.36   |
| Decreased Slightly    | 430    | 2.22   |
| Decreased Greatly     | 3,625  | 18.71  |
| Would not Play Anyway | 13,953 | 72.03  |
| Total                 | 19,370 | 100.00 |

**vc009: Dancing Outdoors During the Lunar New Year Outbreak**

|                                 | Freq.  | %      |
|---------------------------------|--------|--------|
| Increased Greatly               | 15     | 0.08   |
| Increased Slightly              | 16     | 0.08   |
| Not Changed                     | 631    | 3.26   |
| Decreased Slightly              | 166    | 0.86   |
| Decreased Greatly               | 1,486  | 7.67   |
| Would not Dance Outdoors Anyway | 17,056 | 88.05  |
| Total                           | 19,370 | 100.00 |

**vc010: Calling and Messaging During the Lunar New Year Outbreak**

|                    | Freq. | %     |
|--------------------|-------|-------|
| Increased Greatly  | 1,992 | 10.28 |
| Increased Slightly | 1,751 | 9.04  |

|                          |        |        |
|--------------------------|--------|--------|
| Not Changed              | 10,050 | 51.88  |
| Decreased Slightly       | 1,061  | 5.48   |
| Decreased Greatly        | 1,863  | 9.62   |
| No Device at Home        | 143    | 0.74   |
| Would not Do This Anyway | 2,510  | 12.96  |
| Total                    | 19,370 | 100.00 |

#### vc011: Making Internet Contact During the Lunar New Year Outbreak

|                          | Freq.  | %      |
|--------------------------|--------|--------|
| Increased Greatly        | 1,709  | 8.82   |
| Increased Slightly       | 1,588  | 8.20   |
| Not Changed              | 5,474  | 28.26  |
| Decreased Slightly       | 545    | 2.81   |
| Decreased Greatly        | 769    | 3.97   |
| No Device at Home        | 818    | 4.22   |
| Would not Do This Anyway | 8,467  | 43.71  |
| Total                    | 19,370 | 100.00 |

#### vc012: Feeling Fears During the Lunar New Year Outbreak

|                      | Freq.  | %      |
|----------------------|--------|--------|
| Rarely or Never      | 11,414 | 58.93  |
| Not often            | 1,862  | 9.61   |
| Sometimes            | 2,784  | 14.37  |
| Often Times          | 3,097  | 15.99  |
| 997 Do not Know      | 209    | 1.08   |
| 999 Refuse to Answer | 4      | 0.02   |
| Total                | 19,370 | 100.00 |

#### vc013: Feeling Anxiety During the Lunar New Year Outbreak

|                      | Freq.  | %      |
|----------------------|--------|--------|
| Rarely or Never      | 12,073 | 62.33  |
| Not often            | 1,947  | 10.05  |
| Sometimes            | 2,839  | 14.66  |
| Often Times          | 2,279  | 11.77  |
| 997 Do not Know      | 228    | 1.18   |
| 999 Refuse to Answer | 4      | 0.02   |
| Total                | 19,370 | 100.00 |

#### vc014: Smoking During the Lunar New Year Outbreak

|                        | Freq.  | %      |
|------------------------|--------|--------|
| Increased Greatly      | 182    | 0.94   |
| Increased Slightly     | 344    | 1.78   |
| Not Changed            | 4,197  | 21.67  |
| Decreased Slightly     | 414    | 2.14   |
| Decreased Greatly      | 601    | 3.10   |
| Would not Smoke Anyway | 13,632 | 70.38  |
| Total                  | 19,370 | 100.00 |

#### vc015: Drinking During the Lunar New Year Outbreak

|                        | Freq.  | %      |
|------------------------|--------|--------|
| Increased Greatly      | 73     | 0.38   |
| Increased Slightly     | 240    | 1.24   |
| Not Changed            | 4,741  | 24.48  |
| Decreased Slightly     | 554    | 2.86   |
| Decreased Greatly      | 1,216  | 6.28   |
| Would not Drink Anyway | 12,546 | 64.77  |
| Total                  | 19,370 | 100.00 |

**vc016: Sleeping During the Lunar New Year Outbreak**

|                    | Freq.  | %      |
|--------------------|--------|--------|
| Increased Greatly  | 919    | 4.74   |
| Increased Slightly | 967    | 4.99   |
| Not Changed        | 15,262 | 78.80  |
| Decreased Slightly | 1,295  | 6.69   |
| Decreased Greatly  | 926    | 4.78   |
| Total              | 19,369 | 100.00 |

**vc017: Eating During the Lunar New Year Outbreak**

|                    | Freq.  | %      |
|--------------------|--------|--------|
| Increased Greatly  | 162    | 0.84   |
| Increased Slightly | 372    | 1.92   |
| Not Changed        | 16,564 | 85.52  |
| Decreased Slightly | 1,542  | 7.96   |
| Decreased Greatly  | 728    | 3.76   |
| Total              | 19,368 | 100.00 |

**vd001\_s1: Residential Area Completely Shut Down**

|       | Freq.  | %      |
|-------|--------|--------|
| 0 No  | 9,124  | 47.11  |
| 1 Yes | 10,244 | 52.89  |
| Total | 19,368 | 100.00 |

**vd001\_s2: Restricted Entry or Exit for Residents**

|       | Freq.  | %      |
|-------|--------|--------|
| 0 No  | 9,491  | 49.00  |
| 2 Yes | 9,877  | 51.00  |
| Total | 19,368 | 100.00 |

**vd001\_s3: No Entry Into Residential Area for Non-Residents**

|       | Freq.  | %      |
|-------|--------|--------|
| 0 No  | 8,180  | 42.23  |
| 3 Yes | 11,188 | 57.77  |
| Total | 19,368 | 100.00 |

**vd001\_s4: Restricted Entry for Non-Residents**

|       | Freq.  | %      |
|-------|--------|--------|
| 0 No  | 10,870 | 56.12  |
| 4 Yes | 8,498  | 43.88  |
| Total | 19,368 | 100.00 |

**vd001\_s5: No Restrictions on Entry and Exit**

|       | Freq.  | %      |
|-------|--------|--------|
| 0 No  | 17,887 | 92.35  |
| 5 Yes | 1,481  | 7.65   |
| Total | 19,368 | 100.00 |

**vd001\_s997: Do not Know**

|         | Freq.  | %      |
|---------|--------|--------|
| 0 No    | 18,439 | 95.20  |
| 997 Yes | 929    | 4.80   |
| Total   | 19,368 | 100.00 |

**vd001\_s999: Refuse to Answer**

|         | Freq.  | %      |
|---------|--------|--------|
| 0 No    | 19,303 | 99.66  |
| 999 Yes | 65     | 0.34   |
| Total   | 19,368 | 100.00 |

**vd001\_1: Days of Isolation at This Level**

| Mean  | SD    | Min  | Max    | Obs   |
|-------|-------|------|--------|-------|
| 41.81 | 23.64 | 1.00 | 120.00 | 9,657 |

**vd001\_2: Days of Isolation at This Level**

| Mean  | SD    | Min  | Max    | Obs   |
|-------|-------|------|--------|-------|
| 40.39 | 24.69 | 1.00 | 200.00 | 9,177 |

**vd001\_3: Days of Isolation at This Level**

| Mean  | SD    | Min  | Max    | Obs    |
|-------|-------|------|--------|--------|
| 42.26 | 26.82 | 1.00 | 300.00 | 10,150 |

**vd001\_4: Days of Isolation at This Level**

| Mean  | SD    | Min  | Max    | Obs   |
|-------|-------|------|--------|-------|
| 45.27 | 32.85 | 1.00 | 300.00 | 7,185 |

**vd002: Days of Outdoor Dancing Cancellation**

| Mean  | SD    | Min  | Max    | Obs    |
|-------|-------|------|--------|--------|
| 46.13 | 60.03 | 0.00 | 250.00 | 15,304 |

**vd003: Days of Cancellation of Public Recreation Playing Mahjong and Cards**

| Mean  | SD    | Min  | Max    | Obs    |
|-------|-------|------|--------|--------|
| 47.22 | 57.52 | 0.00 | 250.00 | 14,637 |

**xquarantined: Ever Quarantined**

| Mean | SD   | Min  | Max  | Obs    |
|------|------|------|------|--------|
| 0.02 | 0.13 | 0.00 | 1.00 | 19,374 |

**xvcnotinquarantine: String constant: During the Pandemic but Excluding Quarantine Time**

| A String Variable |  |  |  |     |
|-------------------|--|--|--|-----|
| Obs:              |  |  |  | 359 |

**xvcoutbreak: String constant: During the Lunar New Year Outbreak**

| A String Variable |  |  |  |        |
|-------------------|--|--|--|--------|
| Obs:              |  |  |  | 19,374 |

**xiwmonth: Interview Month**

| Mean | SD   | Min  | Max   | Obs    |
|------|------|------|-------|--------|
| 7.52 | 0.51 | 6.00 | 11.00 | 19,383 |

**xiwyear: Interview Year**

| Mean     | SD   | Min      | Max      | Obs    |
|----------|------|----------|----------|--------|
| 2,020.00 | 0.04 | 2,017.00 | 2,020.00 | 19,383 |

**proxy\_14: Answered by a Proxy**

|       | Freq. | %      |
|-------|-------|--------|
| 1 Yes | 1,705 | 99.07  |
| 2 No  | 16    | 0.93   |
| Total | 1,721 | 100.00 |

**versionID: Version ID**

| A String Variable |  |  |  |  |
|-------------------|--|--|--|--|
|-------------------|--|--|--|--|

Obs:

19,383

---



---

## Exit Module

---

### ID: Individual ID

|                   |     |
|-------------------|-----|
| A String Variable |     |
| Obs:              | 770 |

### householdID: Household ID

|                   |     |
|-------------------|-----|
| A String Variable |     |
| Obs:              | 770 |

### communityID: Community ID

|                   |     |
|-------------------|-----|
| A String Variable |     |
| Obs:              | 770 |

### exb001\_1: Year of Death

| Mean     | SD   | Min      | Max      | Obs |
|----------|------|----------|----------|-----|
| 2,018.16 | 1.69 | 2,011.00 | 2,020.00 | 107 |

### exb001\_2: Month of Death

| Mean | SD   | Min  | Max   | Obs |
|------|------|------|-------|-----|
| 6.36 | 3.88 | 1.00 | 12.00 | 107 |

### exb001\_3: Day of Death

| Mean  | SD   | Min  | Max   | Obs |
|-------|------|------|-------|-----|
| 10.65 | 9.31 | 1.00 | 31.00 | 107 |

### exb002: Solar Calendar or Lunar Calendar

|                  | Freq. | %      |
|------------------|-------|--------|
| 1 Solar calendar | 588   | 76.46  |
| 2 Lunar calendar | 181   | 23.54  |
| Total            | 769   | 100.00 |

**exb003: Residence, Before Death**

|                    | Freq. | %      |
|--------------------|-------|--------|
| 1 Chinese Mainland | 769   | 100.00 |
| Total              | 769   | 100.00 |

**exb004: Type of Residence, Before Death**

|                         | Freq. | %      |
|-------------------------|-------|--------|
| 1 Family Housing        | 702   | 91.41  |
| 2 Workplace             | 3     | 0.39   |
| 3 Nursing home          | 12    | 1.56   |
| 4 Hospital              | 48    | 6.25   |
| 5 Other, Please Specify | 3     | 0.39   |
| Total                   | 768   | 100.00 |

**exb005: Address of Death**

|                           | Freq. | %      |
|---------------------------|-------|--------|
| 1 Residence, Before Death | 666   | 86.72  |
| 2 Chinese Mainland        | 102   | 13.28  |
| Total                     | 768   | 100.00 |

**exb006: Type of Address of Death**

|                              | Freq. | %      |
|------------------------------|-------|--------|
| 1 Home                       | 601   | 78.26  |
| 2 Workplace                  | 5     | 0.65   |
| 3 Hospital                   | 131   | 17.06  |
| 4 On the Way to the Hospital | 4     | 0.52   |
| 5 Nursing home               | 9     | 1.17   |
| 6 Hospice                    | 1     | 0.13   |
| 7 Other, Please Specify      | 17    | 2.21   |
| Total                        | 768   | 100.00 |

**exb007: Was the Death Expected at About the Time It Occurred?**

|                         | Freq. | %      |
|-------------------------|-------|--------|
| 1 Expected              | 365   | 47.53  |
| 2 Unexpected            | 396   | 51.56  |
| 3 Other, Please Specify | 7     | 0.91   |
| Total                   | 768   | 100.00 |

**exb008: How Long Is the Time Between the Start of the Final Illness and Death?**

|                                    | Freq. | %      |
|------------------------------------|-------|--------|
| 1 One or two hours (or no warning) | 86    | 11.20  |
| 2 Less Than A Day                  | 43    | 5.60   |
| 3 Less Than A Week                 | 53    | 6.90   |
| 4 Less Than A Month                | 118   | 15.36  |
| 5 Less Than A Year                 | 231   | 30.08  |
| 6 More Than A Year                 | 237   | 30.86  |
| Total                              | 768   | 100.00 |

**exb009: Marital Status at the Time of R Died**

|                 | Freq. | %      |
|-----------------|-------|--------|
| 1 Married       | 461   | 60.10  |
| 2 Separated     | 4     | 0.52   |
| 3 Divorced      | 13    | 1.69   |
| 4 Widowed       | 271   | 35.33  |
| 5 Never Married | 16    | 2.09   |
| 6 Cohabitation  | 2     | 0.26   |
| Total           | 767   | 100.00 |

**exb010: Live With His/Her Spouse or Cohabitant When R Died**

|       | Freq. | %      |
|-------|-------|--------|
| Yes   | 428   | 92.44  |
| 2 No  | 35    | 7.56   |
| Total | 463   | 100.00 |

**exb011: Death Certificate**

|       | Freq. | %      |
|-------|-------|--------|
| 1 Yes | 486   | 63.36  |
| 2 No  | 281   | 36.64  |
| Total | 767   | 100.00 |

**exb012: Where Did R's Death Certificate Filed**

|                                              | Freq. | %      |
|----------------------------------------------|-------|--------|
| 1 Residence, Before Death                    | 375   | 77.16  |
| 2 Other Community of Residence, Before Death | 41    | 8.44   |
| 3 Other, Please Specify                      | 70    | 14.40  |
| Total                                        | 486   | 100.00 |

**exb013: Household Registration Cancelled**

|       | Freq. | %      |
|-------|-------|--------|
| 1 Yes | 641   | 83.79  |
| 2 No  | 124   | 16.21  |
| Total | 765   | 100.00 |

**exb014: Reason for Not Canceling Household Registration**

|                                                   | Freq. | %      |
|---------------------------------------------------|-------|--------|
| 1 Time Is too Short to Deal with the Cancellation | 51    | 41.13  |
| 2 The Cancellation Is Not Important               | 26    | 20.97  |
| 3 Other, Please Specify                           | 47    | 37.90  |
| Total                                             | 124   | 100.00 |

**exc001\_1\_:** Is ZChildName[1] Still Alive

|       | Freq. | %      |
|-------|-------|--------|
| 1 Yes | 681   | 98.27  |
| 2 No  | 12    | 1.73   |
| Total | 693   | 100.00 |

**exc001\_2\_:** Is ZChildName[2] Still Alive

|       | Freq. | %      |
|-------|-------|--------|
| 1 Yes | 621   | 98.26  |
| 2 No  | 11    | 1.74   |
| Total | 632   | 100.00 |

**exc001\_3\_:** Is ZChildName[3] Still Alive

|       | Freq. | %      |
|-------|-------|--------|
| 1 Yes | 471   | 98.74  |
| 2 No  | 6     | 1.26   |
| Total | 477   | 100.00 |

**exc001\_4\_:** Is ZChildName[4] Still Alive

|       | Freq. | %      |
|-------|-------|--------|
| 1 Yes | 321   | 98.77  |
| 2 No  | 4     | 1.23   |
| Total | 325   | 100.00 |

**exc003\_1\_:** XEChildAliveName[1]'s Birth Year

| Mean     | SD    | Min      | Max      | Obs |
|----------|-------|----------|----------|-----|
| 1,979.00 | 24.04 | 1,962.00 | 1,996.00 | 2   |

**exc003\_2\_:** XEChildAliveName[2]'s Birth Year

| Mean     | SD    | Min      | Max      | Obs |
|----------|-------|----------|----------|-----|
| 1,974.75 | 12.63 | 1,960.00 | 1,988.00 | 4   |

**exc003\_3\_:** XEChildAliveName[3]'s Birth Year

| Mean | SD | Min | Max | Obs |
|------|----|-----|-----|-----|
|------|----|-----|-----|-----|

|          |       |          |          |   |
|----------|-------|----------|----------|---|
| 1,969.00 | 14.93 | 1,958.00 | 1,986.00 | 3 |
|----------|-------|----------|----------|---|

**exc003\_4\_**: XEChildAliveName[4]'s Birth Year

| Mean     | SD   | Min      | Max      | Obs |
|----------|------|----------|----------|-----|
| 1,968.50 | 3.32 | 1,966.00 | 1,973.00 | 4   |

**exc003\_5\_**: XEChildAliveName[5]'s Birth Year

| Mean     | SD   | Min      | Max      | Obs |
|----------|------|----------|----------|-----|
| 1,966.67 | 7.64 | 1,960.00 | 1,975.00 | 3   |

**exc003\_6\_**: XEChildAliveName[6]'s Birth Year

| Mean     | SD | Min      | Max      | Obs |
|----------|----|----------|----------|-----|
| 1,967.00 | .  | 1,967.00 | 1,967.00 | 1   |

**exc003\_7\_**: XEChildAliveName[7]'s Birth Year

| Mean     | SD | Min      | Max      | Obs |
|----------|----|----------|----------|-----|
| 1,950.00 | .  | 1,950.00 | 1,950.00 | 1   |

**exc003\_8\_**: XEChildAliveName[8]'s Birth Year

| Mean     | SD | Min      | Max      | Obs |
|----------|----|----------|----------|-----|
| 1,953.00 | .  | 1,953.00 | 1,953.00 | 1   |

**exc003\_9\_**: XEChildAliveName[9]'s Birth Year

| Mean     | SD | Min      | Max      | Obs |
|----------|----|----------|----------|-----|
| 1,960.00 | .  | 1,960.00 | 1,960.00 | 1   |

**exc004\_1\_**: XEChildAliveName[1]'s Gender

|          | Freq. | %      |
|----------|-------|--------|
| 1 Male   | 499   | 73.27  |
| 2 Female | 182   | 26.73  |
| Total    | 681   | 100.00 |

**exc004\_2\_**: XEChildAliveName[2]'s Gender

|          | Freq. | %      |
|----------|-------|--------|
| 1 Male   | 341   | 54.91  |
| 2 Female | 280   | 45.09  |
| Total    | 621   | 100.00 |

**exc004\_3\_**: XEChildAliveName[3]'s Gender

|          | Freq. | %      |
|----------|-------|--------|
| 1 Male   | 209   | 44.37  |
| 2 Female | 262   | 55.63  |
| Total    | 471   | 100.00 |

**exc004\_4\_:** XEChildAliveName[4]'s Gender

|          | Freq. | %      |
|----------|-------|--------|
| 1 Male   | 123   | 38.32  |
| 2 Female | 198   | 61.68  |
| Total    | 321   | 100.00 |

**exc004\_5\_:** XEChildAliveName[5]'s Gender

|          | Freq. | %      |
|----------|-------|--------|
| 1 Male   | 56    | 30.27  |
| 2 Female | 129   | 69.73  |
| Total    | 185   | 100.00 |

**exc004\_6\_:** XEChildAliveName[6]'s Gender

|          | Freq. | %      |
|----------|-------|--------|
| 1 Male   | 19    | 21.84  |
| 2 Female | 68    | 78.16  |
| Total    | 87    | 100.00 |

**exc004\_7\_:** XEChildAliveName[7]'s Gender

|          | Freq. | %      |
|----------|-------|--------|
| 1 Male   | 13    | 29.55  |
| 2 Female | 31    | 70.45  |
| Total    | 44    | 100.00 |

**exc004\_8\_:** XEChildAliveName[8]'s Gender

|          | Freq. | %      |
|----------|-------|--------|
| 1 Male   | 8     | 53.33  |
| 2 Female | 7     | 46.67  |
| Total    | 15    | 100.00 |

**exc004\_9\_:** XEChildAliveName[9]'s Gender

|          | Freq. | %      |
|----------|-------|--------|
| 1 Male   | 6     | 50.00  |
| 2 Female | 6     | 50.00  |
| Total    | 12    | 100.00 |

**exc004\_10\_:** XEChildAliveName[10]'s Gender

|          | Freq. | %      |
|----------|-------|--------|
| 1 Male   | 2     | 33.33  |
| 2 Female | 4     | 66.67  |
| Total    | 6     | 100.00 |

**exc004\_11\_:** XEChildAliveName[11]'s Gender

|          | Freq. | %      |
|----------|-------|--------|
| 1 Male   | 1     | 33.33  |
| 2 Female | 2     | 66.67  |
| Total    | 3     | 100.00 |

**exc004\_12\_:** XEChildAliveName[12]'s Gender

|          | Freq. | %      |
|----------|-------|--------|
| 2 Female | 1     | 100.00 |
| Total    | 1     | 100.00 |

**exc005\_1\_:** XEChildAliveName[1]'s Highest Degree

|                                            | Freq. | %      |
|--------------------------------------------|-------|--------|
| 2 Did not Finish Primary School            | 8     | 12.70  |
| 4 Elementary School                        | 10    | 15.87  |
| 5 Middle School                            | 12    | 19.05  |
| 6 High School                              | 10    | 15.87  |
| 7 Vocational School                        | 6     | 9.52   |
| 8 Two-/Three-Year College/Associate Degree | 6     | 9.52   |
| 9 Four-Year College/Bachelor's Degree      | 10    | 15.87  |
| 997 Don't Know                             | 1     | 1.59   |
| Total                                      | 63    | 100.00 |

**exc005\_2\_:** XEChildAliveName[2]'s Highest Degree

|                                            | Freq. | %      |
|--------------------------------------------|-------|--------|
| 1 No Formal Education(Illiterate)          | 3     | 4.29   |
| 2 Did not Finish Primary School            | 12    | 17.14  |
| 4 Elementary School                        | 10    | 14.29  |
| 5 Middle School                            | 19    | 27.14  |
| 6 High School                              | 12    | 17.14  |
| 7 Vocational School                        | 4     | 5.71   |
| 8 Two-/Three-Year College/Associate Degree | 2     | 2.86   |
| 9 Four-Year College/Bachelor's Degree      | 5     | 7.14   |
| 10 Master's Degree                         | 1     | 1.43   |
| 997 Don't Know                             | 2     | 2.86   |
| Total                                      | 70    | 100.00 |

**exc005\_3\_:** XEChildAliveName[3]'s Highest Degree

|                                   | Freq. | %     |
|-----------------------------------|-------|-------|
| 1 No Formal Education(Illiterate) | 8     | 16.67 |

|                                       |    |        |
|---------------------------------------|----|--------|
| 2 Did not Finish Primary School       | 3  | 6.25   |
| 4 Elementary School                   | 16 | 33.33  |
| 5 Middle School                       | 12 | 25.00  |
| 6 High School                         | 3  | 6.25   |
| 7 Vocational School                   | 2  | 4.17   |
| 9 Four-Year College/Bachelor's Degree | 2  | 4.17   |
| 997 Don't Know                        | 2  | 4.17   |
| Total                                 | 48 | 100.00 |

#### exc005\_4\_: XEChildAliveName[4]'s Highest Degree

|                                            | Freq. | %      |
|--------------------------------------------|-------|--------|
| 1 No Formal Education(Illiterate)          | 5     | 16.67  |
| 2 Did not Finish Primary School            | 1     | 3.33   |
| 4 Elementary School                        | 9     | 30.00  |
| 5 Middle School                            | 10    | 33.33  |
| 6 High School                              | 3     | 10.00  |
| 8 Two-/Three-Year College/Associate Degree | 1     | 3.33   |
| 9 Four-Year College/Bachelor's Degree      | 1     | 3.33   |
| Total                                      | 30    | 100.00 |

#### exc005\_5\_: XEChildAliveName[5]'s Highest Degree

|                                            | Freq. | %      |
|--------------------------------------------|-------|--------|
| 1 No Formal Education(Illiterate)          | 3     | 13.64  |
| 2 Did not Finish Primary School            | 2     | 9.09   |
| 4 Elementary School                        | 6     | 27.27  |
| 5 Middle School                            | 9     | 40.91  |
| 6 High School                              | 1     | 4.55   |
| 8 Two-/Three-Year College/Associate Degree | 1     | 4.55   |
| Total                                      | 22    | 100.00 |

#### exc005\_6\_: XEChildAliveName[6]'s Highest Degree

|                                       | Freq. | %      |
|---------------------------------------|-------|--------|
| 1 No Formal Education(Illiterate)     | 2     | 20.00  |
| 2 Did not Finish Primary School       | 2     | 20.00  |
| 4 Elementary School                   | 3     | 30.00  |
| 5 Middle School                       | 2     | 20.00  |
| 9 Four-Year College/Bachelor's Degree | 1     | 10.00  |
| Total                                 | 10    | 100.00 |

#### exc005\_7\_: XEChildAliveName[7]'s Highest Degree

|                     | Freq. | %      |
|---------------------|-------|--------|
| 4 Elementary School | 3     | 50.00  |
| 5 Middle School     | 2     | 33.33  |
| 997 Don't Know      | 1     | 16.67  |
| Total               | 6     | 100.00 |

#### exc005\_8\_: XEChildAliveName[8]'s Highest Degree



|                                            | Freq. | %      |
|--------------------------------------------|-------|--------|
| 1 No Formal Education(Illiterate)          | 1     | 20.00  |
| 2 Did not Finish Primary School            | 1     | 20.00  |
| 5 Middle School                            | 1     | 20.00  |
| 8 Two-/Three-Year College/Associate Degree | 1     | 20.00  |
| 997 Don't Know                             | 1     | 20.00  |
| Total                                      | 5     | 100.00 |

**exc005\_9\_:** XEChildAliveName[9]'s Highest Degree

|                                   | Freq. | %      |
|-----------------------------------|-------|--------|
| 1 No Formal Education(Illiterate) | 1     | 20.00  |
| 2 Did not Finish Primary School   | 1     | 20.00  |
| 5 Middle School                   | 2     | 40.00  |
| 997 Don't Know                    | 1     | 20.00  |
| Total                             | 5     | 100.00 |

**exc005\_10\_:** XEChildAliveName[10]'s Highest Degree

|                 | Freq. | %      |
|-----------------|-------|--------|
| 5 Middle School | 2     | 100.00 |
| Total           | 2     | 100.00 |

**exc005\_11\_:** XEChildAliveName[11]'s Highest Degree

|                 | Freq. | %      |
|-----------------|-------|--------|
| 5 Middle School | 2     | 100.00 |
| Total           | 2     | 100.00 |

**exc006\_1\_:** Number of Months That XEChildAliveName[1] Lived With XRName

| Mean | SD   | Min  | Max   | Obs |
|------|------|------|-------|-----|
| 4.41 | 5.29 | 0.00 | 12.00 | 681 |

**exc006\_2\_:** Number of Months That XEChildAliveName[2] Lived With XRName

| Mean | SD   | Min  | Max   | Obs |
|------|------|------|-------|-----|
| 2.44 | 4.34 | 0.00 | 12.00 | 621 |

**exc006\_3\_:** Number of Months That XEChildAliveName[3] Lived With XRName

| Mean | SD   | Min  | Max   | Obs |
|------|------|------|-------|-----|
| 1.78 | 3.79 | 0.00 | 12.00 | 469 |

**exc006\_4\_:** Number of Months That XEChildAliveName[4] Lived With XRName

| Mean | SD | Min | Max | Obs |
|------|----|-----|-----|-----|
|------|----|-----|-----|-----|

|      |      |      |       |     |
|------|------|------|-------|-----|
| 1.46 | 3.46 | 0.00 | 12.00 | 321 |
|------|------|------|-------|-----|

**exc006\_5\_:** Number of Months That XEChildAliveName[5] Lived With XRName

| Mean | SD   | Min  | Max   | Obs |
|------|------|------|-------|-----|
| 1.56 | 3.57 | 0.00 | 12.00 | 185 |

**exc006\_6\_:** Number of Months That XEChildAliveName[6] Lived With XRName

| Mean | SD   | Min  | Max   | Obs |
|------|------|------|-------|-----|
| 0.71 | 2.33 | 0.00 | 12.00 | 87  |

**exc006\_7\_:** Number of Months That XEChildAliveName[7] Lived With XRName

| Mean | SD   | Min  | Max   | Obs |
|------|------|------|-------|-----|
| 1.45 | 3.71 | 0.00 | 12.00 | 44  |

**exc006\_8\_:** Number of Months That XEChildAliveName[8] Lived With XRName

| Mean | SD   | Min  | Max   | Obs |
|------|------|------|-------|-----|
| 1.63 | 4.21 | 0.00 | 12.00 | 15  |

**exc006\_9\_:** Number of Months That XEChildAliveName[9] Lived With XRName

| Mean | SD   | Min  | Max  | Obs |
|------|------|------|------|-----|
| 0.25 | 0.87 | 0.00 | 3.00 | 12  |

**exc006\_10\_:** Number of Months That XEChildAliveName[10] Lived With XRName

| Mean | SD   | Min  | Max  | Obs |
|------|------|------|------|-----|
| 0.00 | 0.00 | 0.00 | 0.00 | 6   |

**exc006\_11\_:** Number of Months That XEChildAliveName[11] Lived With XRName

| Mean | SD   | Min  | Max   | Obs |
|------|------|------|-------|-----|
| 4.00 | 6.93 | 0.00 | 12.00 | 3   |

**exc006\_12\_:** Number of Months That XEChildAliveName[12] Lived With XRName

| Mean | SD | Min  | Max  | Obs |
|------|----|------|------|-----|
| 0.00 | .  | 0.00 | 0.00 | 1   |

**exc007\_1\_:** How Often XRName See XEChildAliveName[1]

|                    | Freq. | %     |
|--------------------|-------|-------|
| 1 Almost Every Day | 82    | 17.19 |

|                           |     |        |
|---------------------------|-----|--------|
| 2 2-3 Times a Week        | 43  | 9.01   |
| 3 Once a week             | 51  | 10.69  |
| 4 Every Two Weeks         | 35  | 7.34   |
| 5 Once a Month            | 63  | 13.21  |
| 6 Once Every Three Months | 41  | 8.60   |
| 7 Once Every Six Months   | 43  | 9.01   |
| 8 Once a Year             | 62  | 13.00  |
| 9 Almost Never            | 28  | 5.87   |
| 10 Other                  | 29  | 6.08   |
| Total                     | 477 | 100.00 |

**exc007\_2\_:** How Often XRName See XEChildAliveName[2]

|                           | Freq. | %      |
|---------------------------|-------|--------|
| 1 Almost Every Day        | 95    | 18.06  |
| 2 2-3 Times a Week        | 51    | 9.70   |
| 3 Once a week             | 60    | 11.41  |
| 4 Every Two Weeks         | 38    | 7.22   |
| 5 Once a Month            | 67    | 12.74  |
| 6 Once Every Three Months | 38    | 7.22   |
| 7 Once Every Six Months   | 52    | 9.89   |
| 8 Once a Year             | 61    | 11.60  |
| 9 Almost Never            | 32    | 6.08   |
| 10 Other                  | 32    | 6.08   |
| Total                     | 526   | 100.00 |

**exc007\_3\_:** How Often XRName See XEChildAliveName[3]

|                           | Freq. | %      |
|---------------------------|-------|--------|
| 1 Almost Every Day        | 71    | 16.99  |
| 2 2-3 Times a Week        | 33    | 7.89   |
| 3 Once a week             | 45    | 10.77  |
| 4 Every Two Weeks         | 38    | 9.09   |
| 5 Once a Month            | 60    | 14.35  |
| 6 Once Every Three Months | 40    | 9.57   |
| 7 Once Every Six Months   | 38    | 9.09   |
| 8 Once a Year             | 56    | 13.40  |
| 9 Almost Never            | 19    | 4.55   |
| 10 Other                  | 18    | 4.31   |
| Total                     | 418   | 100.00 |

**exc007\_4\_:** How Often XRName See XEChildAliveName[4]

|                           | Freq. | %      |
|---------------------------|-------|--------|
| 1 Almost Every Day        | 33    | 11.22  |
| 2 2-3 Times a Week        | 42    | 14.29  |
| 3 Once a week             | 31    | 10.54  |
| 4 Every Two Weeks         | 24    | 8.16   |
| 5 Once a Month            | 33    | 11.22  |
| 6 Once Every Three Months | 32    | 10.88  |
| 7 Once Every Six Months   | 33    | 11.22  |
| 8 Once a Year             | 35    | 11.90  |
| 9 Almost Never            | 13    | 4.42   |
| 10 Other                  | 18    | 6.12   |
| Total                     | 294   | 100.00 |

**exc007\_5\_:** How Often XRName See XEChildAliveName[5]

|                           | Freq. | %      |
|---------------------------|-------|--------|
| 1 Almost Every Day        | 15    | 8.93   |
| 2 2-3 Times a Week        | 21    | 12.50  |
| 3 Once a week             | 14    | 8.33   |
| 4 Every Two Weeks         | 21    | 12.50  |
| 5 Once a Month            | 23    | 13.69  |
| 6 Once Every Three Months | 21    | 12.50  |
| 7 Once Every Six Months   | 13    | 7.74   |
| 8 Once a Year             | 21    | 12.50  |
| 9 Almost Never            | 7     | 4.17   |
| 10 Other                  | 12    | 7.14   |
| Total                     | 168   | 100.00 |

**exc007\_6\_:** How Often XRName See XEChildAliveName[6]

|                           | Freq. | %      |
|---------------------------|-------|--------|
| 1 Almost Every Day        | 14    | 16.67  |
| 2 2-3 Times a Week        | 12    | 14.29  |
| 3 Once a week             | 5     | 5.95   |
| 4 Every Two Weeks         | 10    | 11.90  |
| 5 Once a Month            | 8     | 9.52   |
| 6 Once Every Three Months | 9     | 10.71  |
| 7 Once Every Six Months   | 8     | 9.52   |
| 8 Once a Year             | 10    | 11.90  |
| 9 Almost Never            | 5     | 5.95   |
| 10 Other                  | 3     | 3.57   |
| Total                     | 84    | 100.00 |

**exc007\_7\_:** How Often XRName See XEChildAliveName[7]

|                           | Freq. | %      |
|---------------------------|-------|--------|
| 1 Almost Every Day        | 8     | 20.00  |
| 2 2-3 Times a Week        | 4     | 10.00  |
| 3 Once a week             | 2     | 5.00   |
| 4 Every Two Weeks         | 2     | 5.00   |
| 5 Once a Month            | 5     | 12.50  |
| 6 Once Every Three Months | 7     | 17.50  |
| 7 Once Every Six Months   | 4     | 10.00  |
| 8 Once a Year             | 5     | 12.50  |
| 9 Almost Never            | 2     | 5.00   |
| 10 Other                  | 1     | 2.50   |
| Total                     | 40    | 100.00 |

**exc007\_8\_:** How Often XRName See XEChildAliveName[8]

|                           | Freq. | %     |
|---------------------------|-------|-------|
| 1 Almost Every Day        | 3     | 23.08 |
| 3 Once a week             | 1     | 7.69  |
| 4 Every Two Weeks         | 2     | 15.38 |
| 5 Once a Month            | 1     | 7.69  |
| 6 Once Every Three Months | 5     | 38.46 |
| 9 Almost Never            | 1     | 7.69  |

|       |    |        |
|-------|----|--------|
| Total | 13 | 100.00 |
|-------|----|--------|

**exc007\_9\_:** How Often XRName See XEChildAliveName[9]

|                           | Freq. | %      |
|---------------------------|-------|--------|
| 1 Almost Every Day        | 1     | 8.33   |
| 2 2-3 Times a Week        | 1     | 8.33   |
| 3 Once a week             | 1     | 8.33   |
| 4 Every Two Weeks         | 1     | 8.33   |
| 5 Once a Month            | 1     | 8.33   |
| 6 Once Every Three Months | 4     | 33.33  |
| 7 Once Every Six Months   | 2     | 16.67  |
| 9 Almost Never            | 1     | 8.33   |
| Total                     | 12    | 100.00 |

**exc007\_10\_:** How Often XRName See XEChildAliveName[10]

|                           | Freq. | %      |
|---------------------------|-------|--------|
| 1 Almost Every Day        | 1     | 16.67  |
| 4 Every Two Weeks         | 1     | 16.67  |
| 6 Once Every Three Months | 3     | 50.00  |
| 7 Once Every Six Months   | 1     | 16.67  |
| Total                     | 6     | 100.00 |

**exc007\_11\_:** How Often XRName See XEChildAliveName[11]

|                   | Freq. | %      |
|-------------------|-------|--------|
| 4 Every Two Weeks | 2     | 100.00 |
| Total             | 2     | 100.00 |

**exc007\_12\_:** How Often XRName See XEChildAliveName[12]

|                | Freq. | %      |
|----------------|-------|--------|
| 9 Almost Never | 1     | 100.00 |
| Total          | 1     | 100.00 |

**exc008:** Number of Grandchildren

| Mean | SD   | Min  | Max   | Obs |
|------|------|------|-------|-----|
| 5.47 | 4.49 | 0.00 | 25.00 | 762 |

**exc009:** Number of Great-Grandchildren

| Mean | SD   | Min  | Max   | Obs |
|------|------|------|-------|-----|
| 2.24 | 4.05 | 0.00 | 25.00 | 762 |

**exda001\_1\_:** Disease[1]

|  | Freq. | % |
|--|-------|---|
|--|-------|---|

|       |     |        |
|-------|-----|--------|
| 1 Yes | 138 | 19.41  |
| 2 No  | 573 | 80.59  |
| Total | 711 | 100.00 |

## exda001\_2\_: Disease[2]

|       | Freq. | %      |
|-------|-------|--------|
| 1 Yes | 58    | 9.80   |
| 2 No  | 534   | 90.20  |
| Total | 592   | 100.00 |

## exda001\_3\_: Disease[3]

|       | Freq. | %      |
|-------|-------|--------|
| 1 Yes | 86    | 15.17  |
| 2 No  | 481   | 84.83  |
| Total | 567   | 100.00 |

## exda001\_4\_: Disease[4]

|       | Freq. | %      |
|-------|-------|--------|
| 1 Yes | 36    | 5.63   |
| 2 No  | 604   | 94.38  |
| Total | 640   | 100.00 |

## exda001\_5\_: Disease[5]

|       | Freq. | %      |
|-------|-------|--------|
| 1 Yes | 11    | 1.52   |
| 2 No  | 713   | 98.48  |
| Total | 724   | 100.00 |

## exda002\_1\_: When Disease[1] First Diagnosed

|        | Freq. | %      |
|--------|-------|--------|
| 1 Year | 127   | 92.03  |
| 2 Age  | 11    | 7.97   |
| Total  | 138   | 100.00 |

## exda002\_1\_1\_: Year

| Mean     | SD     | Min   | Max      | Obs |
|----------|--------|-------|----------|-----|
| 1,906.73 | 462.59 | -1.00 | 2,020.00 | 127 |

## exda002\_2\_1\_: Age

| Mean  | SD    | Min   | Max   | Obs |
|-------|-------|-------|-------|-----|
| 59.64 | 24.56 | -1.00 | 83.00 | 11  |

**exda002\_2\_:** When Disease[2] First Diagnosed

|        | Freq. | %      |
|--------|-------|--------|
| 1 Year | 50    | 86.21  |
| 2 Age  | 8     | 13.79  |
| Total  | 58    | 100.00 |

**exda002\_1\_2\_:** Year

| Mean     | SD     | Min   | Max      | Obs |
|----------|--------|-------|----------|-----|
| 1,652.50 | 782.58 | -1.00 | 2,020.00 | 50  |

**exda002\_2\_2\_:** Age

| Mean  | SD    | Min   | Max   | Obs |
|-------|-------|-------|-------|-----|
| 38.63 | 28.88 | -1.00 | 68.00 | 8   |

**exda002\_3\_:** When Disease[3] First Diagnosed

|        | Freq. | %      |
|--------|-------|--------|
| 1 Year | 75    | 87.21  |
| 2 Age  | 11    | 12.79  |
| Total  | 86    | 100.00 |

**exda002\_1\_3\_:** Year

| Mean     | SD     | Min   | Max      | Obs |
|----------|--------|-------|----------|-----|
| 1,612.04 | 811.97 | -1.00 | 2,020.00 | 75  |

**exda002\_2\_3\_:** Age

| Mean  | SD    | Min   | Max   | Obs |
|-------|-------|-------|-------|-----|
| 59.09 | 21.95 | -1.00 | 82.00 | 11  |

**exda002\_4\_:** When Disease[4] First Diagnosed

|        | Freq. | %      |
|--------|-------|--------|
| 1 Year | 27    | 75.00  |
| 2 Age  | 9     | 25.00  |
| Total  | 36    | 100.00 |

**exda002\_1\_4\_:** Year

| Mean     | SD     | Min   | Max      | Obs |
|----------|--------|-------|----------|-----|
| 1,417.48 | 937.98 | -1.00 | 2,020.00 | 27  |

**exda002\_2\_4\_:** Age

| Mean  | SD    | Min   | Max   | Obs |
|-------|-------|-------|-------|-----|
| 66.67 | 16.76 | 39.00 | 86.00 | 9   |

#### exda002\_5\_: When Disease[5] First Diagnosed

|        | Freq. | %      |
|--------|-------|--------|
| 1 Year | 9     | 81.82  |
| 2 Age  | 2     | 18.18  |
| Total  | 11    | 100.00 |

#### exda002\_1\_5\_: Year

| Mean     | SD     | Min   | Max      | Obs |
|----------|--------|-------|----------|-----|
| 1,790.22 | 671.72 | -1.00 | 2,019.00 | 9   |

#### exda002\_2\_5\_: Age

| Mean  | SD    | Min   | Max   | Obs |
|-------|-------|-------|-------|-----|
| 26.50 | 38.89 | -1.00 | 54.00 | 2   |

#### exda003: Had Heart Attack since Last ZIWTime

|       | Freq. | %      |
|-------|-------|--------|
| 1 Yes | 107   | 38.08  |
| 2 No  | 174   | 61.92  |
| Total | 281   | 100.00 |

#### exda004: When Was the Most Recent Heart Attack

|        | Freq. | %      |
|--------|-------|--------|
| 1 Year | 100   | 93.46  |
| 2 Age  | 7     | 6.54   |
| Total  | 107   | 100.00 |

#### exda004\_1: Year

| Mean     | SD     | Min   | Max      | Obs |
|----------|--------|-------|----------|-----|
| 1,836.47 | 580.78 | -1.00 | 2,020.00 | 100 |

#### exda004\_2: Age

| Mean  | SD    | Min   | Max   | Obs |
|-------|-------|-------|-------|-----|
| 63.00 | 30.53 | -1.00 | 85.00 | 7   |

#### exda005\_s1: Organ or Body Part have Cancer



|         | Freq. | %      |
|---------|-------|--------|
| 0 No    | 174   | 92.06  |
| 1 Brain | 15    | 7.94   |
| Total   | 189   | 100.00 |

**exda005\_s2: Organ or Body Part have Cancer**

|               | Freq. | %      |
|---------------|-------|--------|
| 0 No          | 187   | 98.94  |
| 2 Oral cavity | 2     | 1.06   |
| Total         | 189   | 100.00 |

**exda005\_s3: Organ or Body Part have Cancer**

|          | Freq. | %      |
|----------|-------|--------|
| 0 No     | 184   | 97.35  |
| 3 Larynx | 5     | 2.65   |
| Total    | 189   | 100.00 |

**exda005\_s4: Organ or Body Part have Cancer**

|           | Freq. | %      |
|-----------|-------|--------|
| 0 No      | 183   | 96.83  |
| 4 Pharynx | 6     | 3.17   |
| Total     | 189   | 100.00 |

**exda005\_s5: Organ or Body Part have Cancer**

|           | Freq. | %      |
|-----------|-------|--------|
| 0 No      | 186   | 98.41  |
| 5 Thyroid | 3     | 1.59   |
| Total     | 189   | 100.00 |

**exda005\_s6: Organ or Body Part have Cancer**

|        | Freq. | %      |
|--------|-------|--------|
| 0 No   | 115   | 60.85  |
| 6 Lung | 74    | 39.15  |
| Total  | 189   | 100.00 |

**exda005\_s7: Organ or Body Part have Cancer**

|          | Freq. | %      |
|----------|-------|--------|
| 0 No     | 182   | 96.30  |
| 7 Breast | 7     | 3.70   |
| Total    | 189   | 100.00 |

**exda005\_s8: Organ or Body Part have Cancer**

|              | Freq. | %      |
|--------------|-------|--------|
| 0 No         | 174   | 92.06  |
| 8 Oesophagus | 15    | 7.94   |
| Total        | 189   | 100.00 |

**exda005\_s9: Organ or Body Part have Cancer**

|           | Freq. | %      |
|-----------|-------|--------|
| 0 No      | 158   | 83.60  |
| 9 Stomach | 31    | 16.40  |
| Total     | 189   | 100.00 |

**exda005\_s10: Organ or Body Part have Cancer**

|          | Freq. | %      |
|----------|-------|--------|
| 0 No     | 148   | 78.31  |
| 10 Liver | 41    | 21.69  |
| Total    | 189   | 100.00 |

**exda005\_s11: Organ or Body Part have Cancer**

|             | Freq. | %      |
|-------------|-------|--------|
| 0 No        | 183   | 96.83  |
| 11 Pancreas | 6     | 3.17   |
| Total       | 189   | 100.00 |

**exda005\_s12: Organ or Body Part have Cancer**

|           | Freq. | %      |
|-----------|-------|--------|
| 0 No      | 184   | 97.35  |
| 12 Kidney | 5     | 2.65   |
| Total     | 189   | 100.00 |

**exda005\_s13: Organ or Body Part have Cancer**

|             | Freq. | %      |
|-------------|-------|--------|
| 0 No        | 187   | 98.94  |
| 13 Prostate | 2     | 1.06   |
| Total       | 189   | 100.00 |

**exda005\_s14: Organ or Body Part have Cancer**

|             | Freq. | %      |
|-------------|-------|--------|
| 0 No        | 188   | 99.47  |
| 14 Testicle | 1     | 0.53   |
| Total       | 189   | 100.00 |

**exda005\_s15: Organ or Body Part have Cancer**

|          | Freq. | %      |
|----------|-------|--------|
| 0 No     | 187   | 98.94  |
| 15 Ovary | 2     | 1.06   |
| Total    | 189   | 100.00 |

**exda005\_s16: Organ or Body Part have Cancer**

|           | Freq. | %      |
|-----------|-------|--------|
| 0 No      | 187   | 98.94  |
| 16 Cervix | 2     | 1.06   |
| Total     | 189   | 100.00 |

**exda005\_s17: Organ or Body Part have Cancer**

|                | Freq. | %      |
|----------------|-------|--------|
| 0 No           | 186   | 98.41  |
| 17 Endometrium | 3     | 1.59   |
| Total          | 189   | 100.00 |

**exda005\_s18: Organ or Body Part have Cancer**

|                    | Freq. | %      |
|--------------------|-------|--------|
| 0 No               | 174   | 92.06  |
| 18 Colon or Rectum | 15    | 7.94   |
| Total              | 189   | 100.00 |

**exda005\_s19: Organ or Body Part have Cancer**

|            | Freq. | %      |
|------------|-------|--------|
| 0 No       | 186   | 98.41  |
| 19 Bladder | 3     | 1.59   |
| Total      | 189   | 100.00 |

**exda005\_s20: Organ or Body Part have Cancer**

|         | Freq. | %      |
|---------|-------|--------|
| 0 No    | 188   | 99.47  |
| 20 Skin | 1     | 0.53   |
| Total   | 189   | 100.00 |

**exda005\_s21: Organ or Body Part have Cancer**

|                         | Freq. | %      |
|-------------------------|-------|--------|
| 0 No                    | 186   | 98.41  |
| 21 Non-Hodgkin lymphoma | 3     | 1.59   |
| Total                   | 189   | 100.00 |

**exda005\_s22: Organ or Body Part have Cancer**

|             | Freq. | %      |
|-------------|-------|--------|
| 0 No        | 185   | 97.88  |
| 22 Leukemia | 4     | 2.12   |
| Total       | 189   | 100.00 |

**exda005\_s23: Organ or Body Part have Cancer**

|                | Freq. | %      |
|----------------|-------|--------|
| 0 No           | 146   | 77.25  |
| 23 Other organ | 43    | 22.75  |
| Total          | 189   | 100.00 |

**exda006\_s1: Treatments for Cancer Two Years Before Death**

|                                       | Freq. | %      |
|---------------------------------------|-------|--------|
| 0 No                                  | 101   | 53.44  |
| 1 Taking Chinese Traditional Medicine | 88    | 46.56  |
| Total                                 | 189   | 100.00 |

**exda006\_s2: Treatments for Cancer Two Years Before Death**

|                                  | Freq. | %      |
|----------------------------------|-------|--------|
| 0 No                             | 50    | 26.46  |
| 2 Taking Western Modern Medicine | 139   | 73.54  |
| Total                            | 189   | 100.00 |

**exda006\_s3: Treatments for Cancer Two Years Before Death**

|                | Freq. | %      |
|----------------|-------|--------|
| 0 No           | 125   | 66.14  |
| 3 Chemotherapy | 64    | 33.86  |
| Total          | 189   | 100.00 |

**exda006\_s4: Treatments for Cancer Two Years Before Death**

|           | Freq. | %      |
|-----------|-------|--------|
| 0 No      | 133   | 70.37  |
| 4 Surgery | 56    | 29.63  |
| Total     | 189   | 100.00 |

**exda006\_s5: Treatments for Cancer Two Years Before Death**

|                     | Freq. | %      |
|---------------------|-------|--------|
| 0 No                | 161   | 85.19  |
| 5 Radiation Therapy | 28    | 14.81  |
| Total               | 189   | 100.00 |

**exda006\_s6: Treatments for Cancer Two Years Before Death**

|                                    | Freq. | %      |
|------------------------------------|-------|--------|
| 0 No                               | 165   | 87.30  |
| 6 Other Treatments, Please Specify | 24    | 12.70  |
| Total                              | 189   | 100.00 |

**exda006\_s7: Treatments for Cancer Two Years Before Death**

|                     | Freq. | %      |
|---------------------|-------|--------|
| 0 No                | 170   | 89.95  |
| 7 None of the Above | 19    | 10.05  |
| Total               | 189   | 100.00 |

**exda007: Had Stroke since Last ZIWTime**

|       | Freq. | %      |
|-------|-------|--------|
| 1 Yes | 34    | 21.52  |
| 2 No  | 124   | 78.48  |
| Total | 158   | 100.00 |

**exda008: When Was the Most Recent Stroke**

|        | Freq. | %      |
|--------|-------|--------|
| 1 Year | 32    | 94.12  |
| 2 Age  | 2     | 5.88   |
| Total  | 34    | 100.00 |

**exda008\_1: Year**

| Mean     | SD     | Min   | Max      | Obs |
|----------|--------|-------|----------|-----|
| 1,702.63 | 744.86 | -1.00 | 2,020.00 | 32  |

**exda008\_2: Age**

| Mean  | SD   | Min   | Max   | Obs |
|-------|------|-------|-------|-----|
| 82.50 | 0.71 | 82.00 | 83.00 | 2   |

**exda009: Memory Problems**

|       | Freq. | %      |
|-------|-------|--------|
| 1 Yes | 179   | 23.49  |
| 2 No  | 583   | 76.51  |
| Total | 762   | 100.00 |

**exda010: When Having Apparent Memory Problems**

|        | Freq. | %     |
|--------|-------|-------|
| 1 Year | 120   | 67.04 |

|       |     |        |
|-------|-----|--------|
| 2 Age | 59  | 32.96  |
| Total | 179 | 100.00 |

**exda010\_1: Year**

| Mean     | SD     | Min   | Max      | Obs |
|----------|--------|-------|----------|-----|
| 1,831.88 | 584.71 | -1.00 | 2,020.00 | 120 |

**exda010\_2: Age**

| Mean  | SD    | Min   | Max   | Obs |
|-------|-------|-------|-------|-----|
| 75.17 | 15.31 | -1.00 | 97.00 | 59  |

**exda011: Memory Problems Happened**

|            | Freq. | %      |
|------------|-------|--------|
| 1 Suddenly | 36    | 20.11  |
| 2 Slowly   | 143   | 79.89  |
| Total      | 179   | 100.00 |

**exda012: Memory Problems Getting Worse**

|       | Freq. | %      |
|-------|-------|--------|
| 1 Yes | 148   | 82.68  |
| 2 No  | 31    | 17.32  |
| Total | 179   | 100.00 |

**exda013: Fallen Down since ZIWTime**

|       | Freq. | %      |
|-------|-------|--------|
| 1 Yes | 245   | 32.15  |
| 2 No  | 517   | 67.85  |
| Total | 762   | 100.00 |

**exda014: Times Falling Needing Medical Treatment**

| Mean | SD   | Min  | Max  | Obs |
|------|------|------|------|-----|
| 0.70 | 0.90 | 0.00 | 5.00 | 245 |

**exda015: Fractured Hip since ZIWTime**

|       | Freq. | %      |
|-------|-------|--------|
| 1 Yes | 21    | 2.76   |
| 2 No  | 741   | 97.24  |
| Total | 762   | 100.00 |

**exda016: Troubled with Body Pain**

|               | Freq. | %      |
|---------------|-------|--------|
| 1 None        | 252   | 33.07  |
| 2 A Little    | 178   | 23.36  |
| 3 Somewhat    | 83    | 10.89  |
| 4 Quite a Bit | 115   | 15.09  |
| 5 A Lot       | 134   | 17.59  |
| Total         | 762   | 100.00 |

**exda017: Other Major Illness**

|       | Freq. | %      |
|-------|-------|--------|
| 1 Yes | 149   | 19.55  |
| 2 No  | 613   | 80.45  |
| Total | 762   | 100.00 |

**exda019: Severe Fatigue**

|       | Freq. | %      |
|-------|-------|--------|
| 1 Yes | 407   | 53.41  |
| 2 No  | 355   | 46.59  |
| Total | 762   | 100.00 |

**exda020: Fetal and Urinary Incontinence**

|       | Freq. | %      |
|-------|-------|--------|
| 1 Yes | 236   | 30.97  |
| 2 No  | 526   | 69.03  |
| Total | 762   | 100.00 |

**exdb001: Difficulty with Dressing**

|                                       | Freq. | %      |
|---------------------------------------|-------|--------|
| 1 Don't Have Any Difficulty           | 407   | 53.41  |
| 2 Have Difficulty But Can Still Do It | 47    | 6.17   |
| 3 Have Difficulty and Need Help       | 126   | 16.54  |
| 4 Can Not Do It                       | 182   | 23.88  |
| Total                                 | 762   | 100.00 |

**exdb002: Help Dress**

|       | Freq. | %      |
|-------|-------|--------|
| 1 Yes | 332   | 93.52  |
| 2 No  | 23    | 6.48   |
| Total | 355   | 100.00 |

**exdb003: Time Need Help with Dressing**

|          | Freq. | %     |
|----------|-------|-------|
| 1 Months | 190   | 57.23 |

|                       |     |        |
|-----------------------|-----|--------|
| 2 Years               | 91  | 27.41  |
| 3 Age                 | 7   | 2.11   |
| 4 Since Specific Year | 44  | 13.25  |
| Total                 | 332 | 100.00 |

**exdb003\_1: Months**

| Mean | SD   | Min  | Max   | Obs |
|------|------|------|-------|-----|
| 3.07 | 2.35 | 0.30 | 14.00 | 190 |

**exdb003\_2: Years**

| Mean | SD   | Min  | Max   | Obs |
|------|------|------|-------|-----|
| 3.63 | 4.14 | 0.50 | 27.00 | 91  |

**exdb003\_3: Age**

| Mean  | SD    | Min   | Max   | Obs |
|-------|-------|-------|-------|-----|
| 71.43 | 10.36 | 57.00 | 90.00 | 7   |

**exdb003\_4: Since Specific Year**

| Mean     | SD   | Min      | Max      | Obs |
|----------|------|----------|----------|-----|
| 2,016.82 | 3.42 | 2,000.00 | 2,019.00 | 44  |

**exdb004: Difficulty with Bathing or Showering**

|                                       | Freq. | %      |
|---------------------------------------|-------|--------|
| 1 Don't Have Any Difficulty           | 320   | 41.99  |
| 2 Have Difficulty But Can Still Do It | 29    | 3.81   |
| 3 Have Difficulty and Need Help       | 177   | 23.23  |
| 4 Can Not Do It                       | 236   | 30.97  |
| Total                                 | 762   | 100.00 |

**exdb005: Help Bathing or Showering**

|       | Freq. | %      |
|-------|-------|--------|
| 1 Yes | 406   | 91.86  |
| 2 No  | 36    | 8.14   |
| Total | 442   | 100.00 |

**exdb006: Time Need Help with Bathing or Showering**

|                       | Freq. | %     |
|-----------------------|-------|-------|
| 1 Months              | 213   | 52.46 |
| 2 Years               | 124   | 30.54 |
| 3 Age                 | 9     | 2.22  |
| 4 Since Specific Year | 60    | 14.78 |



|       |     |        |
|-------|-----|--------|
| Total | 406 | 100.00 |
|-------|-----|--------|

**exdb006\_1: Months**

| Mean | SD   | Min  | Max   | Obs |
|------|------|------|-------|-----|
| 3.47 | 2.76 | 0.30 | 18.00 | 213 |

**exdb006\_2: Years**

| Mean | SD   | Min  | Max   | Obs |
|------|------|------|-------|-----|
| 3.60 | 4.16 | 0.50 | 27.00 | 124 |

**exdb006\_3: Age**

| Mean  | SD    | Min   | Max   | Obs |
|-------|-------|-------|-------|-----|
| 64.56 | 16.13 | 30.00 | 87.00 | 9   |

**exdb006\_4: Since Specific Year**

| Mean     | SD   | Min      | Max      | Obs |
|----------|------|----------|----------|-----|
| 2,015.32 | 9.83 | 1,943.00 | 2,019.00 | 60  |

**exdb007: Difficulty with Eating**

|                                       | Freq. | %      |
|---------------------------------------|-------|--------|
| 1 Don't Have Any Difficulty           | 455   | 59.71  |
| 2 Have Difficulty But Can Still Do It | 45    | 5.91   |
| 3 Have Difficulty and Need Help       | 116   | 15.22  |
| 4 Can Not Do It                       | 146   | 19.16  |
| Total                                 | 762   | 100.00 |

**exdb008: Help Eating**

|       | Freq. | %      |
|-------|-------|--------|
| 1 Yes | 277   | 90.23  |
| 2 No  | 30    | 9.77   |
| Total | 307   | 100.00 |

**exdb009: Time Need Help with Eating**

|                       | Freq. | %      |
|-----------------------|-------|--------|
| 1 Months              | 181   | 65.34  |
| 2 Years               | 59    | 21.30  |
| 3 Age                 | 2     | 0.72   |
| 4 Since Specific Year | 35    | 12.64  |
| Total                 | 277   | 100.00 |

**exdb009\_1: Months**

| Mean | SD   | Min  | Max   | Obs |
|------|------|------|-------|-----|
| 2.92 | 2.39 | 0.50 | 14.00 | 181 |

**exdb009\_2: Years**

| Mean | SD   | Min  | Max   | Obs |
|------|------|------|-------|-----|
| 2.94 | 2.56 | 0.50 | 11.00 | 59  |

**exdb009\_3: Age**

| Mean  | SD   | Min   | Max   | Obs |
|-------|------|-------|-------|-----|
| 70.00 | 0.00 | 70.00 | 70.00 | 2   |

**exdb009\_4: Since Specific Year**

| Mean     | SD   | Min      | Max      | Obs |
|----------|------|----------|----------|-----|
| 2,017.09 | 2.24 | 2,010.00 | 2,020.00 | 35  |

**exdb010: Difficulty with Getting up**

|                                       | Freq. | %      |
|---------------------------------------|-------|--------|
| 1 Don't Have Any Difficulty           | 372   | 48.82  |
| 2 Have Difficulty But Can Still Do It | 58    | 7.61   |
| 3 Have Difficulty and Need Help       | 156   | 20.47  |
| 4 Can Not Do It                       | 176   | 23.10  |
| Total                                 | 762   | 100.00 |

**exdb011: Help Getting up**

|       | Freq. | %      |
|-------|-------|--------|
| 1 Yes | 339   | 86.92  |
| 2 No  | 51    | 13.08  |
| Total | 390   | 100.00 |

**exdb012: Time Need Help with Getting up**

|                       | Freq. | %      |
|-----------------------|-------|--------|
| 1 Months              | 214   | 63.13  |
| 2 Years               | 73    | 21.53  |
| 3 Age                 | 6     | 1.77   |
| 4 Since Specific Year | 46    | 13.57  |
| Total                 | 339   | 100.00 |

**exdb012\_1: Months**

| Mean | SD   | Min  | Max   | Obs |
|------|------|------|-------|-----|
| 3.17 | 2.34 | 0.20 | 14.00 | 214 |

**exdb012\_2: Years**

| Mean | SD   | Min  | Max   | Obs |
|------|------|------|-------|-----|
| 3.64 | 4.15 | 0.50 | 26.00 | 73  |

**exdb012\_3: Age**

| Mean  | SD   | Min   | Max   | Obs |
|-------|------|-------|-------|-----|
| 75.17 | 8.40 | 65.00 | 88.00 | 6   |

**exdb012\_4: Since Specific Year**

| Mean     | SD   | Min      | Max      | Obs |
|----------|------|----------|----------|-----|
| 2,017.43 | 1.96 | 2,010.00 | 2,020.00 | 46  |

**exdb013: Difficulty with Using the Toilet**

|                                       | Freq. | %      |
|---------------------------------------|-------|--------|
| 1 Don't Have Any Difficulty           | 381   | 50.00  |
| 2 Have Difficulty But Can Still Do It | 45    | 5.91   |
| 3 Have Difficulty and Need Help       | 159   | 20.87  |
| 4 Can Not Do It                       | 177   | 23.23  |
| Total                                 | 762   | 100.00 |

**exdb014: Help Using the Toilet**

|       | Freq. | %      |
|-------|-------|--------|
| 1 Yes | 348   | 91.34  |
| 2 No  | 33    | 8.66   |
| Total | 381   | 100.00 |

**exdb015: Time Need Help with Using the Toilet**

|                       | Freq. | %      |
|-----------------------|-------|--------|
| 1 Months              | 219   | 62.93  |
| 2 Years               | 73    | 20.98  |
| 3 Age                 | 6     | 1.72   |
| 4 Since Specific Year | 50    | 14.37  |
| Total                 | 348   | 100.00 |

**exdb015\_1: Months**

| Mean | SD   | Min  | Max   | Obs |
|------|------|------|-------|-----|
| 3.31 | 2.56 | 0.30 | 18.00 | 219 |

**exdb015\_2: Years**

| Mean | SD | Min | Max | Obs |
|------|----|-----|-----|-----|
|------|----|-----|-----|-----|

|      |      |      |       |    |
|------|------|------|-------|----|
| 3.45 | 3.74 | 1.00 | 27.00 | 73 |
|------|------|------|-------|----|

**exdb015\_3: Age**

| Mean  | SD   | Min   | Max   | Obs |
|-------|------|-------|-------|-----|
| 71.50 | 7.15 | 64.00 | 82.00 | 6   |

**exdb015\_4: Since Specific Year**

| Mean     | SD   | Min      | Max      | Obs |
|----------|------|----------|----------|-----|
| 2,017.38 | 1.98 | 2,010.00 | 2,020.00 | 50  |

**exdb016: Difficulty with Cooking**

|                                       | Freq. | %      |
|---------------------------------------|-------|--------|
| 1 Don't Have Any Difficulty           | 306   | 40.16  |
| 2 Have Difficulty But Can Still Do It | 19    | 2.49   |
| 3 Have Difficulty and Need Help       | 56    | 7.35   |
| 4 Can Not Do It                       | 381   | 50.00  |
| Total                                 | 762   | 100.00 |

**exdb017: Help Cooking**

|       | Freq. | %      |
|-------|-------|--------|
| 1 Yes | 389   | 85.31  |
| 2 No  | 67    | 14.69  |
| Total | 456   | 100.00 |

**exdb018: Time Need Help with Cooking**

|                       | Freq. | %      |
|-----------------------|-------|--------|
| 1 Months              | 166   | 42.67  |
| 2 Years               | 151   | 38.82  |
| 3 Age                 | 8     | 2.06   |
| 4 Since Specific Year | 64    | 16.45  |
| Total                 | 389   | 100.00 |

**exdb018\_1: Months**

| Mean | SD   | Min  | Max   | Obs |
|------|------|------|-------|-----|
| 3.66 | 2.69 | 0.30 | 14.00 | 166 |

**exdb018\_2: Years**

| Mean | SD   | Min  | Max   | Obs |
|------|------|------|-------|-----|
| 5.99 | 9.19 | 1.00 | 67.00 | 151 |

**exdb018\_3: Age**

| Mean  | SD    | Min  | Max   | Obs |
|-------|-------|------|-------|-----|
| 63.75 | 27.68 | 1.00 | 90.00 | 8   |

**exdb018\_4: Since Specific Year**

| Mean     | SD   | Min      | Max      | Obs |
|----------|------|----------|----------|-----|
| 2,015.75 | 6.07 | 1,974.00 | 2,020.00 | 64  |

**exdb019: Difficulty with Shopping for Groceries**

|                                       | Freq. | %      |
|---------------------------------------|-------|--------|
| 1 Don't Have Any Difficulty           | 334   | 43.83  |
| 2 Have Difficulty But Can Still Do It | 12    | 1.57   |
| 3 Have Difficulty and Need Help       | 64    | 8.40   |
| 4 Can Not Do It                       | 352   | 46.19  |
| Total                                 | 762   | 100.00 |

**exdb020: Help Shopping for Groceries**

|       | Freq. | %      |
|-------|-------|--------|
| 1 Yes | 375   | 87.62  |
| 2 No  | 53    | 12.38  |
| Total | 428   | 100.00 |

**exdb021: Time Need Help with Shopping for Groceries**

|                       | Freq. | %      |
|-----------------------|-------|--------|
| 1 Months              | 154   | 41.07  |
| 2 Years               | 157   | 41.87  |
| 3 Age                 | 14    | 3.73   |
| 4 Since Specific Year | 50    | 13.33  |
| Total                 | 375   | 100.00 |

**exdb021\_1: Months**

| Mean | SD   | Min  | Max   | Obs |
|------|------|------|-------|-----|
| 3.96 | 2.75 | 0.30 | 18.00 | 154 |

**exdb021\_2: Years**

| Mean | SD   | Min  | Max   | Obs |
|------|------|------|-------|-----|
| 4.75 | 5.51 | 0.50 | 37.00 | 157 |

**exdb021\_3: Age**

| Mean  | SD    | Min   | Max   | Obs |
|-------|-------|-------|-------|-----|
| 73.57 | 11.61 | 57.00 | 92.00 | 14  |

**exdb021\_4: Since Specific Year**

| Mean     | SD   | Min      | Max      | Obs |
|----------|------|----------|----------|-----|
| 2,016.04 | 4.00 | 2,000.00 | 2,020.00 | 50  |

**exdb022: Difficulty with Making Phone Calls**

|                                       | Freq. | %      |
|---------------------------------------|-------|--------|
| 1 Don't Have Any Difficulty           | 446   | 58.53  |
| 2 Have Difficulty But Can Still Do It | 11    | 1.44   |
| 3 Have Difficulty and Need Help       | 59    | 7.74   |
| 4 Can Not Do It                       | 246   | 32.28  |
| Total                                 | 762   | 100.00 |

**exdb023: Help Making Phone Calls**

|       | Freq. | %      |
|-------|-------|--------|
| 1 Yes | 203   | 64.24  |
| 2 No  | 113   | 35.76  |
| Total | 316   | 100.00 |

**exdb024: Time Need Help with Making Phone Calls**

|                       | Freq. | %      |
|-----------------------|-------|--------|
| 1 Months              | 78    | 38.42  |
| 2 Years               | 75    | 36.95  |
| 3 Age                 | 12    | 5.91   |
| 4 Since Specific Year | 38    | 18.72  |
| Total                 | 203   | 100.00 |

**exdb024\_1: Months**

| Mean | SD   | Min  | Max   | Obs |
|------|------|------|-------|-----|
| 3.53 | 2.31 | 0.30 | 14.00 | 78  |

**exdb024\_2: Years**

| Mean | SD    | Min  | Max   | Obs |
|------|-------|------|-------|-----|
| 7.20 | 11.61 | 1.00 | 80.00 | 75  |

**exdb024\_3: Age**

| Mean  | SD    | Min  | Max   | Obs |
|-------|-------|------|-------|-----|
| 61.50 | 31.17 | 1.00 | 92.00 | 12  |

**exdb024\_4: Since Specific Year**

| Mean | SD | Min | Max | Obs |
|------|----|-----|-----|-----|
|------|----|-----|-----|-----|

|          |       |          |          |    |
|----------|-------|----------|----------|----|
| 2,007.61 | 20.86 | 1,925.00 | 2,019.00 | 38 |
|----------|-------|----------|----------|----|

**exdb025: Difficulty with Taking Medications**

|                                       | Freq. | %      |
|---------------------------------------|-------|--------|
| 1 Don't Have Any Difficulty           | 441   | 57.87  |
| 2 Have Difficulty But Can Still Do It | 17    | 2.23   |
| 3 Have Difficulty and Need Help       | 128   | 16.80  |
| 4 Can Not Do It                       | 176   | 23.10  |
| Total                                 | 762   | 100.00 |

**exdb026: Help Taking Medications**

|       | Freq. | %      |
|-------|-------|--------|
| 1 Yes | 303   | 94.39  |
| 2 No  | 18    | 5.61   |
| Total | 321   | 100.00 |

**exdb027: Time Need Help with Taking Medications**

|                       | Freq. | %      |
|-----------------------|-------|--------|
| 1 Months              | 152   | 50.17  |
| 2 Years               | 95    | 31.35  |
| 3 Age                 | 12    | 3.96   |
| 4 Since Specific Year | 44    | 14.52  |
| Total                 | 303   | 100.00 |

**exdb027\_1: Months**

| Mean | SD   | Min  | Max   | Obs |
|------|------|------|-------|-----|
| 3.97 | 2.44 | 0.50 | 14.00 | 152 |

**exdb027\_2: Years**

| Mean | SD   | Min  | Max   | Obs |
|------|------|------|-------|-----|
| 3.19 | 3.06 | 0.50 | 20.00 | 95  |

**exdb027\_3: Age**

| Mean  | SD    | Min   | Max   | Obs |
|-------|-------|-------|-------|-----|
| 77.42 | 10.48 | 57.00 | 92.00 | 12  |

**exdb027\_4: Since Specific Year**

| Mean     | SD   | Min      | Max      | Obs |
|----------|------|----------|----------|-----|
| 2,016.93 | 2.34 | 2,010.00 | 2,020.00 | 44  |

**exdb028: Difficulty with Managing Money**

|                                       | Freq. | %      |
|---------------------------------------|-------|--------|
| 1 Don't Have Any Difficulty           | 451   | 59.19  |
| 2 Have Difficulty But Can Still Do It | 15    | 1.97   |
| 3 Have Difficulty and Need Help       | 53    | 6.96   |
| 4 Can Not Do It                       | 243   | 31.89  |
| Total                                 | 762   | 100.00 |

### exdb029: Help Managing Money

|       | Freq. | %      |
|-------|-------|--------|
| 1 Yes | 253   | 81.35  |
| 2 No  | 58    | 18.65  |
| Total | 311   | 100.00 |

### exdb030: Time Need Help with Managing Money

|                       | Freq. | %      |
|-----------------------|-------|--------|
| 1 Months              | 88    | 34.78  |
| 2 Years               | 106   | 41.90  |
| 3 Age                 | 10    | 3.95   |
| 4 Since Specific Year | 49    | 19.37  |
| Total                 | 253   | 100.00 |

### exdb030\_1: Months

| Mean | SD   | Min  | Max   | Obs |
|------|------|------|-------|-----|
| 4.42 | 3.47 | 0.30 | 18.00 | 88  |

### exdb030\_2: Years

| Mean | SD   | Min  | Max   | Obs |
|------|------|------|-------|-----|
| 5.18 | 9.21 | 0.50 | 80.00 | 106 |

### exdb030\_3: Age

| Mean  | SD    | Min  | Max   | Obs |
|-------|-------|------|-------|-----|
| 69.10 | 25.72 | 1.00 | 92.00 | 10  |

### exdb030\_4: Since Specific Year

| Mean     | SD   | Min      | Max      | Obs |
|----------|------|----------|----------|-----|
| 2,014.22 | 7.55 | 1,975.00 | 2,020.00 | 49  |

### exdb031\_s1: Helper[1]

|      | Freq. | %     |
|------|-------|-------|
| 0 No | 294   | 54.75 |



|          |     |        |
|----------|-----|--------|
| 1 Spouse | 243 | 45.25  |
| Total    | 537 | 100.00 |

**exdb031\_s2: Helper[2]**

|                                                | Freq. | %      |
|------------------------------------------------|-------|--------|
| 0 No                                           | 535   | 99.63  |
| 2 Father, Mother, Father-in-Law, Mother-in-Law | 2     | 0.37   |
| Total                                          | 537   | 100.00 |

**exdb031\_s3: Helper[3]**

|                                                        | Freq. | %      |
|--------------------------------------------------------|-------|--------|
| 0 No                                                   | 187   | 34.82  |
| 3 Children, Children's Spouse, Grandson, Granddaughter | 350   | 65.18  |
| Total                                                  | 537   | 100.00 |

**exdb031\_s4: Helper[4]**

|                                                                  | Freq. | %      |
|------------------------------------------------------------------|-------|--------|
| 0 No                                                             | 519   | 96.65  |
| 4 Sibling, Brother-in-Law, Sister-in-Law, Sibling of Spouse, Etc | 18    | 3.35   |
| Total                                                            | 537   | 100.00 |

**exdb031\_s5: Helper[5]**

|                  | Freq. | %      |
|------------------|-------|--------|
| 0 No             | 533   | 99.26  |
| 5 Other Relative | 4     | 0.74   |
| Total            | 537   | 100.00 |

**exdb031\_s6: Helper[6]**

|                               | Freq. | %      |
|-------------------------------|-------|--------|
| 0 No                          | 523   | 97.39  |
| 6 Paid Helper (Such as Nanny) | 14    | 2.61   |
| Total                         | 537   | 100.00 |

**exdb031\_s7: Helper[7]**

|                                     | Freq. | %      |
|-------------------------------------|-------|--------|
| 0 No                                | 536   | 99.81  |
| 7 Volunteer or Employee of Facility | 1     | 0.19   |
| Total                               | 537   | 100.00 |

**exdb031\_s8: Helper[8]**

|  | Freq. | % |
|--|-------|---|
|--|-------|---|

|                |     |        |
|----------------|-----|--------|
| 0 No           | 525 | 97.77  |
| 8 Nursing Home | 12  | 2.23   |
| Total          | 537 | 100.00 |

**exdb031\_s9: Helper[9]**

|                                         | Freq. | %      |
|-----------------------------------------|-------|--------|
| 0 No                                    | 536   | 99.81  |
| 9 Staff from Home-based Nursing Service | 1     | 0.19   |
| Total                                   | 537   | 100.00 |

**exdb031\_s10: Helper[10]**

|                            | Freq. | %      |
|----------------------------|-------|--------|
| 0 No                       | 536   | 99.81  |
| 10 Help from the Community | 1     | 0.19   |
| Total                      | 537   | 100.00 |

**exdb031\_s11: Helper[11]**

|                          | Freq. | %      |
|--------------------------|-------|--------|
| 0 No                     | 531   | 98.88  |
| 11 Other, Please Specify | 6     | 1.12   |
| Total                    | 537   | 100.00 |

**exdb031\_1: Number of Paid Helpers**

| Mean | SD   | Min  | Max  | Obs |
|------|------|------|------|-----|
| 1.50 | 1.34 | 1.00 | 6.00 | 14  |

**exdb032\_s1: Who Help the Most**

|          | Freq. | %      |
|----------|-------|--------|
| 0 No     | 1     | 50.00  |
| 1 Father | 1     | 50.00  |
| Total    | 2     | 100.00 |

**exdb032\_s2: Who Help the Most**

|       | Freq. | %      |
|-------|-------|--------|
| 0 No  | 2     | 100.00 |
| Total | 2     | 100.00 |

**exdb032\_s3: Who Help the Most**

|       | Freq. | %      |
|-------|-------|--------|
| 0 No  | 2     | 100.00 |
| Total | 2     | 100.00 |

**exdb032\_s4: Who Help the Most**

|                 | Freq. | %      |
|-----------------|-------|--------|
| 0 No            | 1     | 50.00  |
| 4 Mother-in-Law | 1     | 50.00  |
| Total           | 2     | 100.00 |

**exdb033\_s1: Which Child's Family Helped**

|                               | Freq. | %      |
|-------------------------------|-------|--------|
| 0 No                          | 118   | 33.71  |
| 1 Preload XEChildAliveName[1] | 232   | 66.29  |
| Total                         | 350   | 100.00 |

**exdb033\_s2: Which Child's Family Helped**

|                               | Freq. | %      |
|-------------------------------|-------|--------|
| 0 No                          | 161   | 46.00  |
| 2 Preload XEChildAliveName[2] | 189   | 54.00  |
| Total                         | 350   | 100.00 |

**exdb033\_s3: Which Child's Family Helped**

|                               | Freq. | %      |
|-------------------------------|-------|--------|
| 0 No                          | 199   | 56.86  |
| 3 Preload XEChildAliveName[3] | 151   | 43.14  |
| Total                         | 350   | 100.00 |

**exdb033\_s4: Which Child's Family Helped**

|                               | Freq. | %      |
|-------------------------------|-------|--------|
| 0 No                          | 250   | 71.43  |
| 4 Preload XEChildAliveName[4] | 100   | 28.57  |
| Total                         | 350   | 100.00 |

**exdb033\_s5: Which Child's Family Helped**

|                               | Freq. | %      |
|-------------------------------|-------|--------|
| 0 No                          | 296   | 84.57  |
| 5 Preload XEChildAliveName[5] | 54    | 15.43  |
| Total                         | 350   | 100.00 |

**exdb033\_s6: Which Child's Family Helped**

|                               | Freq. | %      |
|-------------------------------|-------|--------|
| 0 No                          | 323   | 92.29  |
| 6 Preload XEChildAliveName[6] | 27    | 7.71   |
| Total                         | 350   | 100.00 |

**exdb033\_s7: Which Child's Family Helped**

|                               | Freq. | %      |
|-------------------------------|-------|--------|
| 0 No                          | 336   | 96.00  |
| 7 Preload XEChildAliveName[7] | 14    | 4.00   |
| Total                         | 350   | 100.00 |

**exdb033\_s8: Which Child's Family Helped**

|                               | Freq. | %      |
|-------------------------------|-------|--------|
| 0 No                          | 348   | 99.43  |
| 8 Preload XEChildAliveName[8] | 2     | 0.57   |
| Total                         | 350   | 100.00 |

**exdb033\_s9: Which Child's Family Helped**

|                               | Freq. | %      |
|-------------------------------|-------|--------|
| 0 No                          | 348   | 99.43  |
| 9 Preload XEChildAliveName[9] | 2     | 0.57   |
| Total                         | 350   | 100.00 |

**exdb033\_s10: Which Child's Family Helped**

|                                 | Freq. | %      |
|---------------------------------|-------|--------|
| 0 No                            | 349   | 99.71  |
| 10 Preload XEChildAliveName[10] | 1     | 0.29   |
| Total                           | 350   | 100.00 |

**exdb033\_s11: Which Child's Family Helped**

|                                 | Freq. | %      |
|---------------------------------|-------|--------|
| 0 No                            | 349   | 99.71  |
| 11 Preload XEChildAliveName[11] | 1     | 0.29   |
| Total                           | 350   | 100.00 |

**exdb033\_s12: Which Child's Family Helped**

|       | Freq. | %      |
|-------|-------|--------|
| 0 No  | 350   | 100.00 |
| Total | 350   | 100.00 |

**exdb033\_s13: Which Child's Family Helped**

|       | Freq. | %      |
|-------|-------|--------|
| 0 No  | 350   | 100.00 |
| Total | 350   | 100.00 |

**exdb033\_s14: Which Child's Family Helped**

|       | Freq. | %      |
|-------|-------|--------|
| Ø No  | 350   | 100.00 |
| Total | 350   | 100.00 |

exdb033\_s15: Which Child's Family Helped

|       | Freq. | %      |
|-------|-------|--------|
| Ø No  | 350   | 100.00 |
| Total | 350   | 100.00 |

exdb033\_s16: Which Child's Family Helped

|       | Freq. | %      |
|-------|-------|--------|
| Ø No  | 350   | 100.00 |
| Total | 350   | 100.00 |

exdb033\_s17: Which Child's Family Helped

|       | Freq. | %      |
|-------|-------|--------|
| Ø No  | 350   | 100.00 |
| Total | 350   | 100.00 |

exdb033\_s18: Which Child's Family Helped

|       | Freq. | %      |
|-------|-------|--------|
| Ø No  | 350   | 100.00 |
| Total | 350   | 100.00 |

exdb033\_s19: Which Child's Family Helped

|       | Freq. | %      |
|-------|-------|--------|
| Ø No  | 350   | 100.00 |
| Total | 350   | 100.00 |

exdb033\_s20: Which Child's Family Helped

|       | Freq. | %      |
|-------|-------|--------|
| Ø No  | 350   | 100.00 |
| Total | 350   | 100.00 |

exdb033\_s21: Which Child's Family Helped

|       | Freq. | %      |
|-------|-------|--------|
| Ø No  | 350   | 100.00 |
| Total | 350   | 100.00 |

exdb033\_s22: Which Child's Family Helped

|       | Freq. | %      |
|-------|-------|--------|
| 0 No  | 350   | 100.00 |
| Total | 350   | 100.00 |

**exdb033\_s23: Which Child's Family Helped**

|       | Freq. | %      |
|-------|-------|--------|
| 0 No  | 350   | 100.00 |
| Total | 350   | 100.00 |

**exdb033\_s24: Which Child's Family Helped**

|       | Freq. | %      |
|-------|-------|--------|
| 0 No  | 350   | 100.00 |
| Total | 350   | 100.00 |

**exdb033\_s25: Which Child's Family Helped**

|       | Freq. | %      |
|-------|-------|--------|
| 0 No  | 350   | 100.00 |
| Total | 350   | 100.00 |

**exdb034\_1\_\_s1: Who in Child[1]'s Family Helped**

|                   | Freq. | %      |
|-------------------|-------|--------|
| 0 No              | 15    | 6.47   |
| 1 Himself/herself | 217   | 93.53  |
| Total             | 232   | 100.00 |

**exdb034\_1\_\_s2: Who in Child[1]'s Family Helped**

|                  | Freq. | %      |
|------------------|-------|--------|
| 0 No             | 74    | 31.90  |
| 2 His/her Spouse | 158   | 68.10  |
| Total            | 232   | 100.00 |

**exdb034\_1\_\_s3: Who in Child[1]'s Family Helped**

|                    | Freq. | %      |
|--------------------|-------|--------|
| 0 No               | 136   | 58.62  |
| 3 His/her Children | 96    | 41.38  |
| Total              | 232   | 100.00 |

**exdb034\_2\_\_s1: Who in Child[2]'s Family Helped**

|      | Freq. | %    |
|------|-------|------|
| 0 No | 10    | 5.29 |

|                   |     |        |
|-------------------|-----|--------|
| 1 Himself/herself | 179 | 94.71  |
| Total             | 189 | 100.00 |

**exdb034\_2\_\_s2: Who in Child[2]'s Family Helped**

|                  | Freq. | %      |
|------------------|-------|--------|
| 0 No             | 74    | 39.15  |
| 2 His/her Spouse | 115   | 60.85  |
| Total            | 189   | 100.00 |

**exdb034\_2\_\_s3: Who in Child[2]'s Family Helped**

|                    | Freq. | %      |
|--------------------|-------|--------|
| 0 No               | 124   | 65.61  |
| 3 His/her Children | 65    | 34.39  |
| Total              | 189   | 100.00 |

**exdb034\_3\_\_s1: Who in Child[3]'s Family Helped**

|                   | Freq. | %      |
|-------------------|-------|--------|
| 0 No              | 5     | 3.31   |
| 1 Himself/herself | 146   | 96.69  |
| Total             | 151   | 100.00 |

**exdb034\_3\_\_s2: Who in Child[3]'s Family Helped**

|                  | Freq. | %      |
|------------------|-------|--------|
| 0 No             | 58    | 38.41  |
| 2 His/her Spouse | 93    | 61.59  |
| Total            | 151   | 100.00 |

**exdb034\_3\_\_s3: Who in Child[3]'s Family Helped**

|                    | Freq. | %      |
|--------------------|-------|--------|
| 0 No               | 97    | 64.24  |
| 3 His/her Children | 54    | 35.76  |
| Total              | 151   | 100.00 |

**exdb034\_4\_\_s1: Who in Child[4]'s Family Helped**

|                   | Freq. | %      |
|-------------------|-------|--------|
| 0 No              | 3     | 3.00   |
| 1 Himself/herself | 97    | 97.00  |
| Total             | 100   | 100.00 |

**exdb034\_4\_\_s2: Who in Child[4]'s Family Helped**

|      | Freq. | %     |
|------|-------|-------|
| 0 No | 40    | 40.00 |

|                  |     |        |
|------------------|-----|--------|
| 2 His/her Spouse | 60  | 60.00  |
| Total            | 100 | 100.00 |

**exdb034\_4\_\_s3: Who in Child[4]'s Family Helped**

|                    | Freq. | %      |
|--------------------|-------|--------|
| 0 No               | 65    | 65.00  |
| 3 His/her Children | 35    | 35.00  |
| Total              | 100   | 100.00 |

**exdb034\_5\_\_s1: Who in Child[5]'s Family Helped**

|                   | Freq. | %      |
|-------------------|-------|--------|
| 0 No              | 1     | 1.85   |
| 1 Himself/herself | 53    | 98.15  |
| Total             | 54    | 100.00 |

**exdb034\_5\_\_s2: Who in Child[5]'s Family Helped**

|                  | Freq. | %      |
|------------------|-------|--------|
| 0 No             | 29    | 53.70  |
| 2 His/her Spouse | 25    | 46.30  |
| Total            | 54    | 100.00 |

**exdb034\_5\_\_s3: Who in Child[5]'s Family Helped**

|                    | Freq. | %      |
|--------------------|-------|--------|
| 0 No               | 39    | 72.22  |
| 3 His/her Children | 15    | 27.78  |
| Total              | 54    | 100.00 |

**exdb034\_6\_\_s1: Who in Child[6]'s Family Helped**

|                   | Freq. | %      |
|-------------------|-------|--------|
| 0 No              | 3     | 11.11  |
| 1 Himself/herself | 24    | 88.89  |
| Total             | 27    | 100.00 |

**exdb034\_6\_\_s2: Who in Child[6]'s Family Helped**

|                  | Freq. | %      |
|------------------|-------|--------|
| 0 No             | 9     | 33.33  |
| 2 His/her Spouse | 18    | 66.67  |
| Total            | 27    | 100.00 |

**exdb034\_6\_\_s3: Who in Child[6]'s Family Helped**

|      | Freq. | %     |
|------|-------|-------|
| 0 No | 19    | 70.37 |



|                    |    |        |
|--------------------|----|--------|
| 3 His/her Children | 8  | 29.63  |
| Total              | 27 | 100.00 |

**exdb034\_7\_\_s1: Who in Child[7]'s Family Helped**

|                   | Freq. | %      |
|-------------------|-------|--------|
| 1 Himself/herself | 14    | 100.00 |
| Total             | 14    | 100.00 |

**exdb034\_7\_\_s2: Who in Child[7]'s Family Helped**

|                  | Freq. | %      |
|------------------|-------|--------|
| 0 No             | 5     | 35.71  |
| 2 His/her Spouse | 9     | 64.29  |
| Total            | 14    | 100.00 |

**exdb034\_7\_\_s3: Who in Child[7]'s Family Helped**

|                    | Freq. | %      |
|--------------------|-------|--------|
| 0 No               | 8     | 57.14  |
| 3 His/her Children | 6     | 42.86  |
| Total              | 14    | 100.00 |

**exdb034\_8\_\_s1: Who in Child[8]'s Family Helped**

|                   | Freq. | %      |
|-------------------|-------|--------|
| 1 Himself/herself | 2     | 100.00 |
| Total             | 2     | 100.00 |

**exdb034\_8\_\_s2: Who in Child[8]'s Family Helped**

|                  | Freq. | %      |
|------------------|-------|--------|
| 0 No             | 1     | 50.00  |
| 2 His/her Spouse | 1     | 50.00  |
| Total            | 2     | 100.00 |

**exdb034\_8\_\_s3: Who in Child[8]'s Family Helped**

|                    | Freq. | %      |
|--------------------|-------|--------|
| 3 His/her Children | 2     | 100.00 |
| Total              | 2     | 100.00 |

**exdb034\_9\_\_s1: Who in Child[9]'s Family Helped**

|                   | Freq. | %      |
|-------------------|-------|--------|
| 0 No              | 1     | 50.00  |
| 1 Himself/herself | 1     | 50.00  |
| Total             | 2     | 100.00 |

**exdb034\_9\_\_s2: Who in Child[9]'s Family Helped**

|                  | Freq. | %      |
|------------------|-------|--------|
| 0 No             | 1     | 50.00  |
| 2 His/her Spouse | 1     | 50.00  |
| Total            | 2     | 100.00 |

**exdb034\_9\_\_s3: Who in Child[9]'s Family Helped**

|                    | Freq. | %      |
|--------------------|-------|--------|
| 0 No               | 1     | 50.00  |
| 3 His/her Children | 1     | 50.00  |
| Total              | 2     | 100.00 |

**exdb034\_10\_\_s1: Who in Child[10]'s Family Helped**

|                   | Freq. | %      |
|-------------------|-------|--------|
| 1 Himself/herself | 1     | 100.00 |
| Total             | 1     | 100.00 |

**exdb034\_10\_\_s2: Who in Child[10]'s Family Helped**

|       | Freq. | %      |
|-------|-------|--------|
| 0 No  | 1     | 100.00 |
| Total | 1     | 100.00 |

**exdb034\_10\_\_s3: Who in Child[10]'s Family Helped**

|       | Freq. | %      |
|-------|-------|--------|
| 0 No  | 1     | 100.00 |
| Total | 1     | 100.00 |

**exdb034\_11\_\_s1: Who in Child[11]'s Family Helped**

|                   | Freq. | %      |
|-------------------|-------|--------|
| 1 Himself/herself | 1     | 100.00 |
| Total             | 1     | 100.00 |

**exdb034\_11\_\_s2: Who in Child[11]'s Family Helped**

|                  | Freq. | %      |
|------------------|-------|--------|
| 2 His/her Spouse | 1     | 100.00 |
| Total            | 1     | 100.00 |

**exdb034\_11\_\_s3: Who in Child[11]'s Family Helped**

|      | Freq. | %      |
|------|-------|--------|
| 0 No | 1     | 100.00 |

|       |   |        |
|-------|---|--------|
| Total | 1 | 100.00 |
|-------|---|--------|

## exdb034\_26\_\_s1: Who in Child[26]'s Family Helped

|                   | Freq. | %      |
|-------------------|-------|--------|
| 0 No              | 4     | 20.00  |
| 1 Himself/herself | 16    | 80.00  |
| Total             | 20    | 100.00 |

## exdb034\_26\_\_s2: Who in Child[26]'s Family Helped

|                  | Freq. | %      |
|------------------|-------|--------|
| 0 No             | 4     | 20.00  |
| 2 His/her Spouse | 16    | 80.00  |
| Total            | 20    | 100.00 |

## exdb034\_26\_\_s3: Who in Child[26]'s Family Helped

|                    | Freq. | %      |
|--------------------|-------|--------|
| 0 No               | 15    | 75.00  |
| 3 His/her Children | 5     | 25.00  |
| Total              | 20    | 100.00 |

## exdb034\_27\_\_s1: Who in Child[27]'s Family Helped

|                   | Freq. | %      |
|-------------------|-------|--------|
| 1 Himself/herself | 6     | 100.00 |
| Total             | 6     | 100.00 |

## exdb034\_27\_\_s2: Who in Child[27]'s Family Helped

|                  | Freq. | %      |
|------------------|-------|--------|
| 0 No             | 2     | 33.33  |
| 2 His/her Spouse | 4     | 66.67  |
| Total            | 6     | 100.00 |

## exdb034\_27\_\_s3: Who in Child[27]'s Family Helped

|                    | Freq. | %      |
|--------------------|-------|--------|
| 0 No               | 4     | 66.67  |
| 3 His/her Children | 2     | 33.33  |
| Total              | 6     | 100.00 |

## exdb034\_28\_\_s1: Who in Child[28]'s Family Helped

|                   | Freq. | %      |
|-------------------|-------|--------|
| 1 Himself/herself | 3     | 100.00 |
| Total             | 3     | 100.00 |

**exdb034\_28\_\_s2: Who in Child[28]'s Family Helped**

|                  | Freq. | %      |
|------------------|-------|--------|
| 0 No             | 2     | 66.67  |
| 2 His/her Spouse | 1     | 33.33  |
| Total            | 3     | 100.00 |

**exdb034\_28\_\_s3: Who in Child[28]'s Family Helped**

|                    | Freq. | %      |
|--------------------|-------|--------|
| 0 No               | 2     | 66.67  |
| 3 His/her Children | 1     | 33.33  |
| Total              | 3     | 100.00 |

**exdb034\_29\_\_s1: Who in Child[29]'s Family Helped**

|                   | Freq. | %      |
|-------------------|-------|--------|
| 1 Himself/herself | 3     | 100.00 |
| Total             | 3     | 100.00 |

**exdb034\_29\_\_s2: Who in Child[29]'s Family Helped**

|                  | Freq. | %      |
|------------------|-------|--------|
| 0 No             | 2     | 66.67  |
| 2 His/her Spouse | 1     | 33.33  |
| Total            | 3     | 100.00 |

**exdb034\_29\_\_s3: Who in Child[29]'s Family Helped**

|                    | Freq. | %      |
|--------------------|-------|--------|
| 0 No               | 2     | 66.67  |
| 3 His/her Children | 1     | 33.33  |
| Total              | 3     | 100.00 |

**exdb034\_1\_1\_: Number of Children Helped**

| Mean | SD   | Min   | Max  | Obs |
|------|------|-------|------|-----|
| 1.79 | 1.09 | -1.00 | 7.00 | 96  |

**exdb034\_1\_2\_: Number of Children Helped**

| Mean | SD   | Min  | Max  | Obs |
|------|------|------|------|-----|
| 1.88 | 1.10 | 1.00 | 8.00 | 65  |

**exdb034\_1\_3\_: Number of Children Helped**

| Mean | SD   | Min  | Max  | Obs |
|------|------|------|------|-----|
| 1.70 | 0.98 | 1.00 | 5.00 | 54  |

**exdb034\_1\_4\_:** Number of Children Helped

| Mean | SD   | Min   | Max  | Obs |
|------|------|-------|------|-----|
| 1.77 | 1.09 | -1.00 | 5.00 | 35  |

**exdb034\_1\_5\_:** Number of Children Helped

| Mean | SD   | Min  | Max  | Obs |
|------|------|------|------|-----|
| 1.93 | 0.88 | 1.00 | 3.00 | 15  |

**exdb034\_1\_6\_:** Number of Children Helped

| Mean | SD   | Min  | Max  | Obs |
|------|------|------|------|-----|
| 2.38 | 1.19 | 1.00 | 4.00 | 8   |

**exdb034\_1\_7\_:** Number of Children Helped

| Mean | SD   | Min  | Max  | Obs |
|------|------|------|------|-----|
| 1.67 | 0.82 | 1.00 | 3.00 | 6   |

**exdb034\_1\_8\_:** Number of Children Helped

| Mean | SD   | Min  | Max  | Obs |
|------|------|------|------|-----|
| 2.00 | 1.41 | 1.00 | 3.00 | 2   |

**exdb034\_1\_9\_:** Number of Children Helped

| Mean | SD | Min  | Max  | Obs |
|------|----|------|------|-----|
| 3.00 | .  | 3.00 | 3.00 | 1   |

**exdb034\_1\_26\_:** Number of Children Helped

| Mean | SD   | Min  | Max  | Obs |
|------|------|------|------|-----|
| 2.20 | 0.45 | 2.00 | 3.00 | 5   |

**exdb034\_1\_27\_:** Number of Children Helped

| Mean | SD   | Min  | Max  | Obs |
|------|------|------|------|-----|
| 1.50 | 0.71 | 1.00 | 2.00 | 2   |

**exdb034\_1\_28\_:** Number of Children Helped

| Mean | SD | Min  | Max  | Obs |
|------|----|------|------|-----|
| 1.00 | .  | 1.00 | 1.00 | 1   |

**exdb034\_1\_29\_:** Number of Children Helped

| Mean | SD | Min  | Max  | Obs |
|------|----|------|------|-----|
| 2.00 | .  | 2.00 | 2.00 | 1   |

**exdb035\_s31:** Which Sibling's Family Helps

|                      | Freq. | %      |
|----------------------|-------|--------|
| 31 Other Sibling[31] | 18    | 100.00 |
| Total                | 18    | 100.00 |

**exdb035\_s32:** Which Sibling's Family Helps

|                      | Freq. | %      |
|----------------------|-------|--------|
| 0 No                 | 14    | 77.78  |
| 32 Other Sibling[32] | 4     | 22.22  |
| Total                | 18    | 100.00 |

**exdb035\_s33:** Which Sibling's Family Helps

|                      | Freq. | %      |
|----------------------|-------|--------|
| 0 No                 | 15    | 83.33  |
| 33 Other Sibling[33] | 3     | 16.67  |
| Total                | 18    | 100.00 |

**exdb035\_s34:** Which Sibling's Family Helps

|                      | Freq. | %      |
|----------------------|-------|--------|
| 0 No                 | 16    | 88.89  |
| 34 Other Sibling[34] | 2     | 11.11  |
| Total                | 18    | 100.00 |

**exdb035\_s35:** Which Sibling's Family Helps

|                      | Freq. | %      |
|----------------------|-------|--------|
| 0 No                 | 16    | 88.89  |
| 35 Other Sibling[35] | 2     | 11.11  |
| Total                | 18    | 100.00 |

**exdb035\_s36:** Which Sibling's Family Helps

|                      | Freq. | %      |
|----------------------|-------|--------|
| 0 No                 | 17    | 94.44  |
| 36 Other Sibling[36] | 1     | 5.56   |
| Total                | 18    | 100.00 |

**exdb035\_s37:** Which Sibling's Family Helps

|                      | Freq. | %      |
|----------------------|-------|--------|
| 0 No                 | 17    | 94.44  |
| 37 Other Sibling[37] | 1     | 5.56   |
| Total                | 18    | 100.00 |

**exdb035\_s38: Which Sibling's Family Helps**

|                      | Freq. | %      |
|----------------------|-------|--------|
| 0 No                 | 17    | 94.44  |
| 38 Other Sibling[38] | 1     | 5.56   |
| Total                | 18    | 100.00 |

**exdb036\_31\_\_s1: Who Help in Person from Sibling[31]'s Family**

|                   | Freq. | %      |
|-------------------|-------|--------|
| 0 No              | 3     | 16.67  |
| 1 Himself/herself | 15    | 83.33  |
| Total             | 18    | 100.00 |

**exdb036\_31\_\_s2: Who Help in Person from Sibling[31]'s Family**

|                  | Freq. | %      |
|------------------|-------|--------|
| 0 No             | 12    | 66.67  |
| 2 His/her Spouse | 6     | 33.33  |
| Total            | 18    | 100.00 |

**exdb036\_31\_\_s3: Who Help in Person from Sibling[31]'s Family**

|                    | Freq. | %      |
|--------------------|-------|--------|
| 0 No               | 12    | 66.67  |
| 3 His/her Children | 6     | 33.33  |
| Total              | 18    | 100.00 |

**exdb036\_32\_\_s1: Who Help in Person from Sibling[32]'s Family**

|                   | Freq. | %      |
|-------------------|-------|--------|
| 0 No              | 1     | 25.00  |
| 1 Himself/herself | 3     | 75.00  |
| Total             | 4     | 100.00 |

**exdb036\_32\_\_s2: Who Help in Person from Sibling[32]'s Family**

|                  | Freq. | %      |
|------------------|-------|--------|
| 0 No             | 1     | 25.00  |
| 2 His/her Spouse | 3     | 75.00  |
| Total            | 4     | 100.00 |

**exdb036\_32\_\_s3: Who Help in Person from Sibling[32]'s Family**

|                    | Freq. | %      |
|--------------------|-------|--------|
| 0 No               | 1     | 25.00  |
| 3 His/her Children | 3     | 75.00  |
| Total              | 4     | 100.00 |

**exdb036\_33\_\_s1: Who Help in Person from Sibling[33]'s Family**

|                   | Freq. | %      |
|-------------------|-------|--------|
| 0 No              | 1     | 33.33  |
| 1 Himself/herself | 2     | 66.67  |
| Total             | 3     | 100.00 |

**exdb036\_33\_\_s2: Who Help in Person from Sibling[33]'s Family**

|                  | Freq. | %      |
|------------------|-------|--------|
| 0 No             | 2     | 66.67  |
| 2 His/her Spouse | 1     | 33.33  |
| Total            | 3     | 100.00 |

**exdb036\_33\_\_s3: Who Help in Person from Sibling[33]'s Family**

|                    | Freq. | %      |
|--------------------|-------|--------|
| 3 His/her Children | 3     | 100.00 |
| Total              | 3     | 100.00 |

**exdb036\_34\_\_s1: Who Help in Person from Sibling[34]'s Family**

|                   | Freq. | %      |
|-------------------|-------|--------|
| 1 Himself/herself | 2     | 100.00 |
| Total             | 2     | 100.00 |

**exdb036\_34\_\_s2: Who Help in Person from Sibling[34]'s Family**

|                  | Freq. | %      |
|------------------|-------|--------|
| 0 No             | 1     | 50.00  |
| 2 His/her Spouse | 1     | 50.00  |
| Total            | 2     | 100.00 |

**exdb036\_34\_\_s3: Who Help in Person from Sibling[34]'s Family**

|                    | Freq. | %      |
|--------------------|-------|--------|
| 0 No               | 1     | 50.00  |
| 3 His/her Children | 1     | 50.00  |
| Total              | 2     | 100.00 |

**exdb036\_35\_\_s1: Who Help in Person from Sibling[35]'s Family**



|                   | Freq. | %      |
|-------------------|-------|--------|
| 1 Himself/herself | 2     | 100.00 |
| Total             | 2     | 100.00 |

**exdb036\_35\_\_s2: Who Help in Person from Sibling[35]'s Family**

|                  | Freq. | %      |
|------------------|-------|--------|
| 0 No             | 1     | 50.00  |
| 2 His/her Spouse | 1     | 50.00  |
| Total            | 2     | 100.00 |

**exdb036\_35\_\_s3: Who Help in Person from Sibling[35]'s Family**

|                    | Freq. | %      |
|--------------------|-------|--------|
| 3 His/her Children | 2     | 100.00 |
| Total              | 2     | 100.00 |

**exdb036\_36\_\_s1: Who Help in Person from Sibling[36]'s Family**

|                   | Freq. | %      |
|-------------------|-------|--------|
| 1 Himself/herself | 1     | 100.00 |
| Total             | 1     | 100.00 |

**exdb036\_36\_\_s2: Who Help in Person from Sibling[36]'s Family**

|                  | Freq. | %      |
|------------------|-------|--------|
| 2 His/her Spouse | 1     | 100.00 |
| Total            | 1     | 100.00 |

**exdb036\_36\_\_s3: Who Help in Person from Sibling[36]'s Family**

|                    | Freq. | %      |
|--------------------|-------|--------|
| 3 His/her Children | 1     | 100.00 |
| Total              | 1     | 100.00 |

**exdb036\_37\_\_s1: Who Help in Person from Sibling[37]'s Family**

|                   | Freq. | %      |
|-------------------|-------|--------|
| 1 Himself/herself | 1     | 100.00 |
| Total             | 1     | 100.00 |

**exdb036\_37\_\_s2: Who Help in Person from Sibling[37]'s Family**

|                  | Freq. | %      |
|------------------|-------|--------|
| 2 His/her Spouse | 1     | 100.00 |
| Total            | 1     | 100.00 |

**exdb036\_37\_\_s3: Who Help in Person from Sibling[37]'s Family**

|                    | Freq. | %      |
|--------------------|-------|--------|
| 3 His/her Children | 1     | 100.00 |
| Total              | 1     | 100.00 |

**exdb036\_38\_\_s1: Who Help in Person from Sibling[38]'s Family**

|       | Freq. | %      |
|-------|-------|--------|
| 0 No  | 1     | 100.00 |
| Total | 1     | 100.00 |

**exdb036\_38\_\_s2: Who Help in Person from Sibling[38]'s Family**

|                  | Freq. | %      |
|------------------|-------|--------|
| 2 His/her Spouse | 1     | 100.00 |
| Total            | 1     | 100.00 |

**exdb036\_38\_\_s3: Who Help in Person from Sibling[38]'s Family**

|                    | Freq. | %      |
|--------------------|-------|--------|
| 3 His/her Children | 1     | 100.00 |
| Total              | 1     | 100.00 |

**exdb036\_1\_31\_: Number of Children Helped**

| Mean | SD   | Min  | Max  | Obs |
|------|------|------|------|-----|
| 3.00 | 2.00 | 1.00 | 6.00 | 6   |

**exdb036\_1\_32\_: Number of Children Helped**

| Mean | SD   | Min  | Max  | Obs |
|------|------|------|------|-----|
| 1.67 | 0.58 | 1.00 | 2.00 | 3   |

**exdb036\_1\_33\_: Number of Children Helped**

| Mean | SD   | Min  | Max  | Obs |
|------|------|------|------|-----|
| 2.00 | 1.00 | 1.00 | 3.00 | 3   |

**exdb036\_1\_34\_: Number of Children Helped**

| Mean | SD | Min  | Max  | Obs |
|------|----|------|------|-----|
| 2.00 | .  | 2.00 | 2.00 | 1   |

**exdb036\_1\_35\_: Number of Children Helped**

| Mean | SD   | Min  | Max  | Obs |
|------|------|------|------|-----|
| 1.50 | 0.71 | 1.00 | 2.00 | 2   |

**exdb036\_1\_36\_:** Number of Children Helped

| Mean | SD | Min  | Max  | Obs |
|------|----|------|------|-----|
| 2.00 | .  | 2.00 | 2.00 | 1   |

**exdb036\_1\_37\_:** Number of Children Helped

| Mean | SD | Min  | Max  | Obs |
|------|----|------|------|-----|
| 2.00 | .  | 2.00 | 2.00 | 1   |

**exdb036\_1\_38\_:** Number of Children Helped

| Mean | SD | Min  | Max  | Obs |
|------|----|------|------|-----|
| 1.00 | .  | 1.00 | 1.00 | 1   |

**exdb037:** Number of Relatives Help in Person

| Mean | SD   | Min  | Max  | Obs |
|------|------|------|------|-----|
| 1.25 | 0.50 | 1.00 | 2.00 | 4   |

**exdb038:** Number of Others Who Help in Person

| Mean | SD   | Min  | Max  | Obs |
|------|------|------|------|-----|
| 2.83 | 1.17 | 2.00 | 5.00 | 6   |

**exdb039\_s1:** Choose Most Important 7 Helpers

|             | Freq. | %      |
|-------------|-------|--------|
| 0 No        | 4     | 5.88   |
| 1 Helper[1] | 64    | 94.12  |
| Total       | 68    | 100.00 |

**exdb039\_s2:** Choose Most Important 7 Helpers

|             | Freq. | %      |
|-------------|-------|--------|
| 0 No        | 13    | 19.12  |
| 2 Helper[2] | 55    | 80.88  |
| Total       | 68    | 100.00 |

**exdb039\_s3:** Choose Most Important 7 Helpers

|  | Freq. | % |
|--|-------|---|
|--|-------|---|

|             |    |        |
|-------------|----|--------|
| 0 No        | 30 | 44.12  |
| 3 Helper[3] | 38 | 55.88  |
| Total       | 68 | 100.00 |

**exdb039\_s4: Choose Most Important 7 Helpers**

|             | Freq. | %      |
|-------------|-------|--------|
| 0 No        | 16    | 23.53  |
| 4 Helper[4] | 52    | 76.47  |
| Total       | 68    | 100.00 |

**exdb039\_s5: Choose Most Important 7 Helpers**

|             | Freq. | %      |
|-------------|-------|--------|
| 0 No        | 18    | 26.47  |
| 5 Helper[5] | 50    | 73.53  |
| Total       | 68    | 100.00 |

**exdb039\_s6: Choose Most Important 7 Helpers**

|             | Freq. | %      |
|-------------|-------|--------|
| 0 No        | 27    | 39.71  |
| 6 Helper[6] | 41    | 60.29  |
| Total       | 68    | 100.00 |

**exdb039\_s7: Choose Most Important 7 Helpers**

|             | Freq. | %      |
|-------------|-------|--------|
| 0 No        | 23    | 33.82  |
| 7 Helper[7] | 45    | 66.18  |
| Total       | 68    | 100.00 |

**exdb039\_s8: Choose Most Important 7 Helpers**

|             | Freq. | %      |
|-------------|-------|--------|
| 0 No        | 22    | 32.35  |
| 8 Helper[8] | 46    | 67.65  |
| Total       | 68    | 100.00 |

**exdb039\_s9: Choose Most Important 7 Helpers**

|             | Freq. | %      |
|-------------|-------|--------|
| 0 No        | 45    | 66.18  |
| 9 Helper[9] | 23    | 33.82  |
| Total       | 68    | 100.00 |

**exdb039\_s10: Choose Most Important 7 Helpers**

|  | Freq. | % |
|--|-------|---|
|--|-------|---|

|               |    |        |
|---------------|----|--------|
| 0 No          | 47 | 69.12  |
| 10 Helper[10] | 21 | 30.88  |
| Total         | 68 | 100.00 |

**exdb039\_s11: Choose Most Important 7 Helpers**

|               | Freq. | %      |
|---------------|-------|--------|
| 0 No          | 50    | 73.53  |
| 11 Helper[11] | 18    | 26.47  |
| Total         | 68    | 100.00 |

**exdb039\_s12: Choose Most Important 7 Helpers**

|               | Freq. | %      |
|---------------|-------|--------|
| 0 No          | 64    | 94.12  |
| 12 Helper[12] | 4     | 5.88   |
| Total         | 68    | 100.00 |

**exdb039\_s13: Choose Most Important 7 Helpers**

|               | Freq. | %      |
|---------------|-------|--------|
| 0 No          | 63    | 92.65  |
| 13 Helper[13] | 5     | 7.35   |
| Total         | 68    | 100.00 |

**exdb039\_s14: Choose Most Important 7 Helpers**

|               | Freq. | %      |
|---------------|-------|--------|
| 0 No          | 63    | 92.65  |
| 14 Helper[14] | 5     | 7.35   |
| Total         | 68    | 100.00 |

**exdb039\_s15: Choose Most Important 7 Helpers**

|               | Freq. | %      |
|---------------|-------|--------|
| 0 No          | 65    | 95.59  |
| 15 Helper[15] | 3     | 4.41   |
| Total         | 68    | 100.00 |

**exdb039\_s16: Choose Most Important 7 Helpers**

|               | Freq. | %      |
|---------------|-------|--------|
| 0 No          | 64    | 94.12  |
| 16 Helper[16] | 4     | 5.88   |
| Total         | 68    | 100.00 |

**exdb039\_s17: Choose Most Important 7 Helpers**

|  | Freq. | % |
|--|-------|---|
|--|-------|---|

|       |    |        |
|-------|----|--------|
| 0 No  | 68 | 100.00 |
| Total | 68 | 100.00 |

### exdb039\_s18: Choose Most Important 7 Helpers

|               | Freq. | %      |
|---------------|-------|--------|
| 0 No          | 67    | 98.53  |
| 18 Helper[18] | 1     | 1.47   |
| Total         | 68    | 100.00 |

### exdb039\_s19: Choose Most Important 7 Helpers

|               | Freq. | %      |
|---------------|-------|--------|
| 0 No          | 67    | 98.53  |
| 19 Helper[19] | 1     | 1.47   |
| Total         | 68    | 100.00 |

### exdb040\_1\_: Days Helper[1] Helped

| Mean  | SD   | Min   | Max   | Obs |
|-------|------|-------|-------|-----|
| 25.48 | 9.55 | -1.00 | 31.00 | 533 |

### exdb040\_2\_: Days Helper[2] Helped

| Mean  | SD    | Min   | Max   | Obs |
|-------|-------|-------|-------|-----|
| 21.13 | 11.73 | -1.00 | 31.00 | 305 |

### exdb040\_3\_: Days Helper[3] Helped

| Mean  | SD    | Min   | Max   | Obs |
|-------|-------|-------|-------|-----|
| 16.90 | 12.05 | -1.00 | 31.00 | 216 |

### exdb040\_4\_: Days Helper[4] Helped

| Mean  | SD    | Min   | Max   | Obs |
|-------|-------|-------|-------|-----|
| 14.88 | 12.19 | -1.00 | 30.00 | 163 |

### exdb040\_5\_: Days Helper[5] Helped

| Mean  | SD    | Min   | Max   | Obs |
|-------|-------|-------|-------|-----|
| 14.54 | 11.89 | -1.00 | 31.00 | 118 |

### exdb040\_6\_: Days Helper[6] Helped

| Mean  | SD    | Min   | Max   | Obs |
|-------|-------|-------|-------|-----|
| 15.95 | 12.18 | -1.00 | 31.00 | 82  |

**exdb040\_7\_:** Days Helper[7] Helped

| Mean  | SD    | Min   | Max   | Obs |
|-------|-------|-------|-------|-----|
| 16.45 | 12.23 | -1.00 | 30.00 | 65  |

**exdb040\_8\_:** Days Helper[8] Helped

| Mean  | SD    | Min   | Max   | Obs |
|-------|-------|-------|-------|-----|
| 17.85 | 12.33 | -1.00 | 30.00 | 46  |

**exdb040\_9\_:** Days Helper[9] Helped

| Mean  | SD    | Min   | Max   | Obs |
|-------|-------|-------|-------|-----|
| 17.48 | 11.90 | -1.00 | 30.00 | 23  |

**exdb040\_10\_:** Days Helper[10] Helped

| Mean  | SD    | Min   | Max   | Obs |
|-------|-------|-------|-------|-----|
| 16.33 | 12.68 | -1.00 | 30.00 | 21  |

**exdb040\_11\_:** Days Helper[11] Helped

| Mean  | SD    | Min  | Max   | Obs |
|-------|-------|------|-------|-----|
| 18.17 | 13.70 | 0.00 | 30.00 | 18  |

**exdb040\_12\_:** Days Helper[12] Helped

| Mean  | SD    | Min  | Max   | Obs |
|-------|-------|------|-------|-----|
| 14.50 | 11.45 | 3.00 | 30.00 | 4   |

**exdb040\_13\_:** Days Helper[13] Helped

| Mean  | SD    | Min  | Max   | Obs |
|-------|-------|------|-------|-----|
| 11.40 | 10.95 | 2.00 | 30.00 | 5   |

**exdb040\_14\_:** Days Helper[14] Helped

| Mean  | SD    | Min  | Max   | Obs |
|-------|-------|------|-------|-----|
| 10.60 | 11.22 | 2.00 | 30.00 | 5   |

**exdb040\_15\_:** Days Helper[15] Helped

| Mean  | SD    | Min  | Max   | Obs |
|-------|-------|------|-------|-----|
| 12.00 | 15.62 | 2.00 | 30.00 | 3   |

**exdb040\_16\_:** Days Helper[16] Helped

| Mean | SD   | Min  | Max   | Obs |
|------|------|------|-------|-----|
| 5.75 | 3.30 | 2.00 | 10.00 | 4   |

#### exdb040\_18\_: Days Helper[18] Helped

| Mean  | SD | Min   | Max   | Obs |
|-------|----|-------|-------|-----|
| 15.00 | .  | 15.00 | 15.00 | 1   |

#### exdb040\_19\_: Days Helper[19] Helped

| Mean | SD | Min  | Max  | Obs |
|------|----|------|------|-----|
| 5.00 | .  | 5.00 | 5.00 | 1   |

#### exdb041\_1\_: Hours Helper[1] Helped

| Mean  | SD   | Min   | Max   | Obs |
|-------|------|-------|-------|-----|
| 10.55 | 9.33 | -1.00 | 24.00 | 533 |

#### exdb041\_2\_: Hours Helper[2] Helped

| Mean | SD   | Min   | Max   | Obs |
|------|------|-------|-------|-----|
| 8.29 | 8.70 | -1.00 | 24.00 | 305 |

#### exdb041\_3\_: Hours Helper[3] Helped

| Mean | SD   | Min   | Max   | Obs |
|------|------|-------|-------|-----|
| 6.56 | 7.63 | -1.00 | 24.00 | 216 |

#### exdb041\_4\_: Hours Helper[4] Helped

| Mean | SD   | Min   | Max   | Obs |
|------|------|-------|-------|-----|
| 7.18 | 8.32 | -1.00 | 24.00 | 163 |

#### exdb041\_5\_: Hours Helper[5] Helped

| Mean | SD   | Min   | Max   | Obs |
|------|------|-------|-------|-----|
| 7.33 | 8.17 | -1.00 | 24.00 | 118 |

#### exdb041\_6\_: Hours Helper[6] Helped

| Mean | SD   | Min   | Max   | Obs |
|------|------|-------|-------|-----|
| 7.68 | 8.29 | -1.00 | 24.00 | 82  |

#### exdb041\_7\_: Hours Helper[7] Helped



| Mean | SD   | Min   | Max   | Obs |
|------|------|-------|-------|-----|
| 9.31 | 8.49 | -1.00 | 24.00 | 65  |

exdb041\_8\_: Hours Helper[8] Helped

| Mean | SD   | Min   | Max   | Obs |
|------|------|-------|-------|-----|
| 6.89 | 6.90 | -1.00 | 24.00 | 46  |

exdb041\_9\_: Hours Helper[9] Helped

| Mean | SD   | Min   | Max   | Obs |
|------|------|-------|-------|-----|
| 9.48 | 8.38 | -1.00 | 24.00 | 23  |

exdb041\_10\_: Hours Helper[10] Helped

| Mean | SD   | Min   | Max   | Obs |
|------|------|-------|-------|-----|
| 7.67 | 7.88 | -1.00 | 24.00 | 21  |

exdb041\_11\_: Hours Helper[11] Helped

| Mean | SD   | Min   | Max   | Obs |
|------|------|-------|-------|-----|
| 8.89 | 8.48 | -1.00 | 24.00 | 18  |

exdb041\_12\_: Hours Helper[12] Helped

| Mean | SD    | Min  | Max   | Obs |
|------|-------|------|-------|-----|
| 7.75 | 10.90 | 1.00 | 24.00 | 4   |

exdb041\_13\_: Hours Helper[13] Helped

| Mean | SD   | Min  | Max   | Obs |
|------|------|------|-------|-----|
| 7.60 | 9.32 | 2.00 | 24.00 | 5   |

exdb041\_14\_: Hours Helper[14] Helped

| Mean | SD   | Min  | Max  | Obs |
|------|------|------|------|-----|
| 3.20 | 2.77 | 1.00 | 8.00 | 5   |

exdb041\_15\_: Hours Helper[15] Helped

| Mean | SD   | Min   | Max  | Obs |
|------|------|-------|------|-----|
| 1.00 | 1.73 | -1.00 | 2.00 | 3   |

exdb041\_16\_: Hours Helper[16] Helped

| Mean | SD   | Min  | Max   | Obs |
|------|------|------|-------|-----|
| 5.00 | 4.76 | 2.00 | 12.00 | 4   |

**exdb041\_18\_:** Hours Helper[18] Helped

| Mean  | SD | Min   | Max   | Obs |
|-------|----|-------|-------|-----|
| 12.00 | .  | 12.00 | 12.00 | 1   |

**exdb041\_19\_:** Hours Helper[19] Helped

| Mean | SD | Min  | Max  | Obs |
|------|----|------|------|-----|
| 4.00 | .  | 4.00 | 4.00 | 1   |

**exdb042\_1\_:** Helper[1] Living in Your Home

|       | Freq. | %      |
|-------|-------|--------|
| 1 Yes | 466   | 87.43  |
| 2 No  | 67    | 12.57  |
| Total | 533   | 100.00 |

**exdb042\_2\_:** Helper[2] Living in Your Home

|       | Freq. | %      |
|-------|-------|--------|
| 1 Yes | 194   | 63.61  |
| 2 No  | 111   | 36.39  |
| Total | 305   | 100.00 |

**exdb042\_3\_:** Helper[3] Living in Your Home

|       | Freq. | %      |
|-------|-------|--------|
| 1 Yes | 121   | 56.02  |
| 2 No  | 95    | 43.98  |
| Total | 216   | 100.00 |

**exdb042\_4\_:** Helper[4] Living in Your Home

|       | Freq. | %      |
|-------|-------|--------|
| 1 Yes | 78    | 47.85  |
| 2 No  | 85    | 52.15  |
| Total | 163   | 100.00 |

**exdb042\_5\_:** Helper[5] Living in Your Home

|       | Freq. | %      |
|-------|-------|--------|
| 1 Yes | 53    | 44.92  |
| 2 No  | 65    | 55.08  |
| Total | 118   | 100.00 |

**exdb042\_6\_:** Helper[6] Living in Your Home

|       | Freq. | %      |
|-------|-------|--------|
| 1 Yes | 42    | 51.22  |
| 2 No  | 40    | 48.78  |
| Total | 82    | 100.00 |

**exdb042\_7\_:** Helper[7] Living in Your Home

|       | Freq. | %      |
|-------|-------|--------|
| 1 Yes | 40    | 61.54  |
| 2 No  | 25    | 38.46  |
| Total | 65    | 100.00 |

**exdb042\_8\_:** Helper[8] Living in Your Home

|       | Freq. | %      |
|-------|-------|--------|
| 1 Yes | 26    | 56.52  |
| 2 No  | 20    | 43.48  |
| Total | 46    | 100.00 |

**exdb042\_9\_:** Helper[9] Living in Your Home

|       | Freq. | %      |
|-------|-------|--------|
| 1 Yes | 13    | 56.52  |
| 2 No  | 10    | 43.48  |
| Total | 23    | 100.00 |

**exdb042\_10\_:** Helper[10] Living in Your Home

|       | Freq. | %      |
|-------|-------|--------|
| 1 Yes | 12    | 57.14  |
| 2 No  | 9     | 42.86  |
| Total | 21    | 100.00 |

**exdb042\_11\_:** Helper[11] Living in Your Home

|       | Freq. | %      |
|-------|-------|--------|
| 1 Yes | 10    | 55.56  |
| 2 No  | 8     | 44.44  |
| Total | 18    | 100.00 |

**exdb042\_12\_:** Helper[12] Living in Your Home

|       | Freq. | %      |
|-------|-------|--------|
| 1 Yes | 2     | 50.00  |
| 2 No  | 2     | 50.00  |
| Total | 4     | 100.00 |

**exdb042\_13\_:** Helper[13] Living in Your Home

|       | Freq. | %      |
|-------|-------|--------|
| 1 Yes | 3     | 60.00  |
| 2 No  | 2     | 40.00  |
| Total | 5     | 100.00 |

**exdb042\_14\_:** Helper[14] Living in Your Home

|       | Freq. | %      |
|-------|-------|--------|
| 1 Yes | 2     | 40.00  |
| 2 No  | 3     | 60.00  |
| Total | 5     | 100.00 |

**exdb042\_15\_:** Helper[15] Living in Your Home

|       | Freq. | %      |
|-------|-------|--------|
| 1 Yes | 2     | 66.67  |
| 2 No  | 1     | 33.33  |
| Total | 3     | 100.00 |

**exdb042\_16\_:** Helper[16] Living in Your Home

|       | Freq. | %      |
|-------|-------|--------|
| 1 Yes | 2     | 50.00  |
| 2 No  | 2     | 50.00  |
| Total | 4     | 100.00 |

**exdb042\_18\_:** Helper[18] Living in Your Home

|       | Freq. | %      |
|-------|-------|--------|
| 2 No  | 1     | 100.00 |
| Total | 1     | 100.00 |

**exdb042\_19\_:** Helper[19] Living in Your Home

|       | Freq. | %      |
|-------|-------|--------|
| 2 No  | 1     | 100.00 |
| Total | 1     | 100.00 |

**exdb043\_s1:** Aids Used

|                 | Freq. | %      |
|-----------------|-------|--------|
| 0 No            | 301   | 56.05  |
| 1 Walking Stick | 236   | 43.95  |
| Total           | 537   | 100.00 |

**exdb043\_s2:** Aids Used

|          | Freq. | %      |
|----------|-------|--------|
| 0 No     | 503   | 93.67  |
| 2 Walker | 34    | 6.33   |
| Total    | 537   | 100.00 |

## exdb043\_s3: Aids Used

|                     | Freq. | %      |
|---------------------|-------|--------|
| 0 No                | 396   | 73.74  |
| 3 Manual Wheelchair | 141   | 26.26  |
| Total               | 537   | 100.00 |

## exdb043\_s4: Aids Used

|                       | Freq. | %      |
|-----------------------|-------|--------|
| 0 No                  | 526   | 97.95  |
| 4 Electric Wheelchair | 11    | 2.05   |
| Total                 | 537   | 100.00 |

## exdb043\_s5: Aids Used

|            | Freq. | %      |
|------------|-------|--------|
| 0 No       | 424   | 78.96  |
| 5 Catheter | 113   | 21.04  |
| Total      | 537   | 100.00 |

## exdb043\_s6: Aids Used

|                 | Freq. | %      |
|-----------------|-------|--------|
| 0 No            | 331   | 61.64  |
| 6 Toilet Series | 206   | 38.36  |
| Total           | 537   | 100.00 |

## exdb043\_s7: Aids Used

|                     | Freq. | %      |
|---------------------|-------|--------|
| 0 No                | 388   | 72.25  |
| 7 None of the Above | 149   | 27.75  |
| Total               | 537   | 100.00 |

## exea001\_s1: Urban Employee Medical Insurance (yi-bao)

| Mean | SD   | Min  | Max  | Obs |
|------|------|------|------|-----|
| 0.14 | 0.35 | 0.00 | 1.00 | 762 |

## exea001\_s2: Urban and Rural Resident Medical Insurance

| Mean | SD   | Min  | Max  | Obs |
|------|------|------|------|-----|
| 0.18 | 0.57 | 0.00 | 2.00 | 762 |

**exea001\_s3: Urban Resident Medical Insurance**

| Mean | SD   | Min  | Max  | Obs |
|------|------|------|------|-----|
| 0.11 | 0.55 | 0.00 | 3.00 | 762 |

**exea001\_s4: New Cooperative Medical Insurance (he-zuo-yi-liao)**

| Mean | SD   | Min  | Max  | Obs |
|------|------|------|------|-----|
| 2.65 | 1.89 | 0.00 | 4.00 | 762 |

**exea001\_s5: Government Medical Insurance (gong-fei-yi-liao)**

| Mean | SD   | Min  | Max  | Obs |
|------|------|------|------|-----|
| 0.10 | 0.72 | 0.00 | 5.00 | 762 |

**exea001\_s6: Medical Aid**

| Mean | SD   | Min  | Max  | Obs |
|------|------|------|------|-----|
| 0.09 | 0.75 | 0.00 | 6.00 | 762 |

**exea001\_s7: Private Medical Insurance: Purchased by Work Unit**

| Mean | SD   | Min  | Max  | Obs |
|------|------|------|------|-----|
| 0.02 | 0.36 | 0.00 | 7.00 | 762 |

**exea001\_s8: Private Medical Insurance: Purchased by Individual**

| Mean | SD   | Min  | Max  | Obs |
|------|------|------|------|-----|
| 0.17 | 1.15 | 0.00 | 8.00 | 762 |

**exea001\_s9: Urban Non-employed Persons's Health Insurance**

| Mean | SD   | Min  | Max  | Obs |
|------|------|------|------|-----|
| 0.04 | 0.56 | 0.00 | 9.00 | 762 |

**exea001\_s10: Long-term Care Insurance**

| Mean | SD   | Min  | Max  | Obs |
|------|------|------|------|-----|
| 0.00 | 0.00 | 0.00 | 0.00 | 762 |

**exea001\_s11: Other Medical Insurance (Specify)**

| Mean | SD   | Min  | Max   | Obs |
|------|------|------|-------|-----|
| 0.23 | 1.58 | 0.00 | 11.00 | 762 |

**exea001\_s12: No Insurance**

| Mean | SD   | Min  | Max   | Obs |
|------|------|------|-------|-----|
| 0.63 | 2.68 | 0.00 | 12.00 | 762 |

**exea001\_verify: Verify Health Insurance**

| Mean | SD   | Min  | Max  | Obs |
|------|------|------|------|-----|
| 1.00 | 0.00 | 1.00 | 1.00 | 39  |

**exea002: Supplemental Insurance**

|       | Freq. | %      |
|-------|-------|--------|
| 1 Yes | 63    | 8.76   |
| 2 No  | 656   | 91.24  |
| Total | 719   | 100.00 |

**exea003\_4\_: Where Did R Set Up XEXMINS\_4\_**

|                                                       | Freq. | %      |
|-------------------------------------------------------|-------|--------|
| 1 Residence Before Death                              | 483   | 95.64  |
| 2 (If It Is Not In This County)The Place of R's HuKou | 18    | 3.56   |
| 3 Other                                               | 4     | 0.79   |
| Total                                                 | 505   | 100.00 |

**exea003\_2\_: Where Did R Set Up XEXMINS\_2\_**

|                                                       | Freq. | %      |
|-------------------------------------------------------|-------|--------|
| 1 Residence Before Death                              | 66    | 95.65  |
| 2 (If It Is Not In This County)The Place of R's HuKou | 3     | 4.35   |
| Total                                                 | 69    | 100.00 |

**exea003\_3\_: Where Did R Set Up XEXMINS\_3\_**

|                                                       | Freq. | %      |
|-------------------------------------------------------|-------|--------|
| 1 Residence Before Death                              | 24    | 88.89  |
| 2 (If It Is Not In This County)The Place of R's HuKou | 3     | 11.11  |
| Total                                                 | 27    | 100.00 |

**exea003\_1\_: Where Did R Set Up XEXMINS\_1\_**

|                                                       | Freq. | %     |
|-------------------------------------------------------|-------|-------|
| 1 Residence Before Death                              | 83    | 76.85 |
| 2 (If It Is Not In This County)The Place of R's HuKou | 10    | 9.26  |

|         |     |        |
|---------|-----|--------|
| 3 Other | 15  | 13.89  |
| Total   | 108 | 100.00 |

#### exea003\_6\_: Where Did R Set Up XEXMINS\_6\_

|                          | Freq. | %      |
|--------------------------|-------|--------|
| 1 Residence Before Death | 12    | 100.00 |
| Total                    | 12    | 100.00 |

#### exea003\_5\_: Where Did R Set Up XEXMINS\_5\_

|                                                       | Freq. | %      |
|-------------------------------------------------------|-------|--------|
| 1 Residence Before Death                              | 12    | 75.00  |
| 2 (If It Is Not In This County)The Place of R's HuKou | 1     | 6.25   |
| 3 Other                                               | 3     | 18.75  |
| Total                                                 | 16    | 100.00 |

#### exea003\_8\_: Where Did R Set Up XEXMINS\_8\_

|                                                       | Freq. | %      |
|-------------------------------------------------------|-------|--------|
| 1 Residence Before Death                              | 13    | 81.25  |
| 2 (If It Is Not In This County)The Place of R's HuKou | 2     | 12.50  |
| 3 Other                                               | 1     | 6.25   |
| Total                                                 | 16    | 100.00 |

#### exea003\_11\_: Where Did R Set Up XEXMINS\_11\_

|                                                       | Freq. | %      |
|-------------------------------------------------------|-------|--------|
| 1 Residence Before Death                              | 15    | 93.75  |
| 2 (If It Is Not In This County)The Place of R's HuKou | 1     | 6.25   |
| Total                                                 | 16    | 100.00 |

#### exea003\_9\_: Where Did R Set Up XEXMINS\_9\_

|                          | Freq. | %      |
|--------------------------|-------|--------|
| 1 Residence Before Death | 3     | 100.00 |
| Total                    | 3     | 100.00 |

#### exea003\_7\_: Where Did R Set Up XEXMINS\_7\_

|                                                       | Freq. | %      |
|-------------------------------------------------------|-------|--------|
| 2 (If It Is Not In This County)The Place of R's HuKou | 1     | 50.00  |
| 3 Other                                               | 1     | 50.00  |
| Total                                                 | 2     | 100.00 |

#### exea008\_1\_4\_: Year of XEXMINS\_4\_ Begin

| Mean     | SD   | Min      | Max      | Obs |
|----------|------|----------|----------|-----|
| 2,006.45 | 8.24 | 1,937.00 | 2,020.00 | 505 |



**exea008\_1\_2\_:** Year of XEXMINS\_2\_ Begin

| Mean     | SD   | Min      | Max      | Obs |
|----------|------|----------|----------|-----|
| 2,007.91 | 7.63 | 1,975.00 | 2,019.00 | 69  |

**exea008\_1\_3\_:** Year of XEXMINS\_3\_ Begin

| Mean     | SD   | Min      | Max      | Obs |
|----------|------|----------|----------|-----|
| 2,006.33 | 9.70 | 1,977.00 | 2,018.00 | 27  |

**exea008\_1\_1\_:** Year of XEXMINS\_1\_ Begin

| Mean     | SD    | Min      | Max      | Obs |
|----------|-------|----------|----------|-----|
| 1,990.28 | 19.04 | 1,930.00 | 2,020.00 | 108 |

**exea008\_1\_6\_:** Year of XEXMINS\_6\_ Begin

| Mean     | SD   | Min      | Max      | Obs |
|----------|------|----------|----------|-----|
| 2,014.25 | 6.65 | 1,994.00 | 2,019.00 | 12  |

**exea008\_1\_5\_:** Year of XEXMINS\_5\_ Begin

| Mean     | SD    | Min      | Max      | Obs |
|----------|-------|----------|----------|-----|
| 1,973.56 | 21.65 | 1,947.00 | 2,014.00 | 16  |

**exea008\_1\_8\_:** Year of XEXMINS\_8\_ Begin

| Mean     | SD   | Min      | Max      | Obs |
|----------|------|----------|----------|-----|
| 2,013.63 | 5.97 | 2,000.00 | 2,020.00 | 16  |

**exea008\_1\_11\_:** Year of XEXMINS\_11\_ Begin

| Mean     | SD   | Min      | Max      | Obs |
|----------|------|----------|----------|-----|
| 2,014.38 | 4.32 | 2,001.00 | 2,019.00 | 16  |

**exea008\_1\_9\_:** Year of XEXMINS\_9\_ Begin

| Mean     | SD   | Min      | Max      | Obs |
|----------|------|----------|----------|-----|
| 2,013.33 | 3.06 | 2,010.00 | 2,016.00 | 3   |

**exea008\_1\_7\_:** Year of XEXMINS\_7\_ Begin

| Mean     | SD    | Min      | Max      | Obs |
|----------|-------|----------|----------|-----|
| 1,995.50 | 28.99 | 1,975.00 | 2,016.00 | 2   |

**exea008\_2\_4\_**: Month of XEXMINS\_4\_ Begin

| Mean | SD   | Min  | Max   | Obs |
|------|------|------|-------|-----|
| 6.10 | 3.94 | 1.00 | 12.00 | 137 |

**exea008\_2\_2\_**: Month of XEXMINS\_2\_ Begin

| Mean | SD   | Min  | Max   | Obs |
|------|------|------|-------|-----|
| 7.64 | 3.67 | 1.00 | 12.00 | 22  |

**exea008\_2\_3\_**: Month of XEXMINS\_3\_ Begin

| Mean | SD   | Min  | Max   | Obs |
|------|------|------|-------|-----|
| 7.30 | 4.03 | 1.00 | 12.00 | 10  |

**exea008\_2\_1\_**: Month of XEXMINS\_1\_ Begin

| Mean | SD   | Min  | Max   | Obs |
|------|------|------|-------|-----|
| 6.20 | 4.03 | 1.00 | 12.00 | 25  |

**exea008\_2\_6\_**: Month of XEXMINS\_6\_ Begin

| Mean | SD   | Min  | Max   | Obs |
|------|------|------|-------|-----|
| 8.25 | 3.10 | 4.00 | 11.00 | 4   |

**exea008\_2\_5\_**: Month of XEXMINS\_5\_ Begin

| Mean | SD   | Min  | Max  | Obs |
|------|------|------|------|-----|
| 6.00 | 1.83 | 4.00 | 8.00 | 4   |

**exea008\_2\_8\_**: Month of XEXMINS\_8\_ Begin

| Mean | SD   | Min  | Max   | Obs |
|------|------|------|-------|-----|
| 5.00 | 4.06 | 1.00 | 10.00 | 5   |

**exea008\_2\_11\_**: Month of XEXMINS\_11\_ Begin

| Mean | SD   | Min  | Max   | Obs |
|------|------|------|-------|-----|
| 5.50 | 3.46 | 1.00 | 10.00 | 8   |

**exea008\_2\_9\_**: Month of XEXMINS\_9\_ Begin

| Mean | SD   | Min  | Max   | Obs |
|------|------|------|-------|-----|
| 9.50 | 0.71 | 9.00 | 10.00 | 2   |

**exea008\_2\_7\_:** Month of XEXMINS\_7\_ Begin

No Observations

**exea009\_s1:** I Do Not Need It

| Mean | SD   | Min  | Max  | Obs |
|------|------|------|------|-----|
| 0.05 | 0.22 | 0.00 | 1.00 | 39  |

**exea009\_s2:** Cannot Afford It

| Mean | SD   | Min  | Max  | Obs |
|------|------|------|------|-----|
| 0.36 | 0.78 | 0.00 | 2.00 | 39  |

**exea009\_s3:** Do Not Know Where or from Whom to Get It

| Mean | SD   | Min  | Max  | Obs |
|------|------|------|------|-----|
| 0.31 | 0.92 | 0.00 | 3.00 | 39  |

**exea009\_s5:** Do Not Have Suitable Programs for Me to Buy

| Mean | SD   | Min  | Max  | Obs |
|------|------|------|------|-----|
| 0.13 | 0.80 | 0.00 | 5.00 | 39  |

**exea009\_s6:** Never Thought of It

| Mean | SD   | Min  | Max  | Obs |
|------|------|------|------|-----|
| 0.92 | 2.19 | 0.00 | 6.00 | 39  |

**exea009\_s7:** Others

| Mean | SD   | Min  | Max  | Obs |
|------|------|------|------|-----|
| 4.31 | 3.45 | 0.00 | 7.00 | 39  |

**exeb001\_s1:** Urban Employee Medical Insurance (yi-bao)

| Mean | SD   | Min  | Max  | Obs |
|------|------|------|------|-----|
| 0.00 | 0.00 | 0.00 | 0.00 | 39  |

**exeb001\_s2:** Urban and Rural Resident Medical Insurance

| Mean | SD   | Min  | Max  | Obs |
|------|------|------|------|-----|
| 0.00 | 0.00 | 0.00 | 0.00 | 39  |

**exeb001\_s3:** Urban Resident Medical Insurance

| Mean | SD   | Min  | Max  | Obs |
|------|------|------|------|-----|
| 0.00 | 0.00 | 0.00 | 0.00 | 39  |

**exeb001\_s4: New Cooperative Medical Insurance (he-zuo-yi-liao)**

| Mean | SD   | Min  | Max  | Obs |
|------|------|------|------|-----|
| 0.31 | 1.08 | 0.00 | 4.00 | 39  |

**exeb001\_s5: Government Medical Insurance (gong-fei)**

| Mean | SD   | Min  | Max  | Obs |
|------|------|------|------|-----|
| 0.00 | 0.00 | 0.00 | 0.00 | 39  |

**exeb001\_s6: Medical Aid**

| Mean | SD   | Min  | Max  | Obs |
|------|------|------|------|-----|
| 0.00 | 0.00 | 0.00 | 0.00 | 39  |

**exeb001\_s7: Private Medical Insurance: Purchased by Work Unit**

| Mean | SD   | Min  | Max  | Obs |
|------|------|------|------|-----|
| 0.00 | 0.00 | 0.00 | 0.00 | 39  |

**exeb001\_s8: Private Medical Insurance: Purchased by Individual**

| Mean | SD   | Min  | Max  | Obs |
|------|------|------|------|-----|
| 0.00 | 0.00 | 0.00 | 0.00 | 39  |

**exeb001\_s9: Urban Non-employed Persons's Health Insurance**

| Mean | SD   | Min  | Max  | Obs |
|------|------|------|------|-----|
| 0.00 | 0.00 | 0.00 | 0.00 | 39  |

**exeb001\_s10: Long-term Care Insurance**

| Mean | SD   | Min  | Max  | Obs |
|------|------|------|------|-----|
| 0.00 | 0.00 | 0.00 | 0.00 | 39  |

**exeb001\_s11: Other Medical Insurance (Specify)**

| Mean | SD   | Min  | Max  | Obs |
|------|------|------|------|-----|
| 0.00 | 0.00 | 0.00 | 0.00 | 39  |

**exeb001\_s12: No Insurance**

| Mean  | SD   | Min  | Max   | Obs |
|-------|------|------|-------|-----|
| 11.08 | 3.24 | 0.00 | 12.00 | 39  |

**exeb003\_1\_4\_:** Year of Stopping Participate in New Cooperative Medical Insurance

| Mean     | SD   | Min      | Max      | Obs |
|----------|------|----------|----------|-----|
| 2,018.67 | 0.58 | 2,018.00 | 2,019.00 | 3   |

**exeb003\_2\_4\_:** Month of Stopping Participate in New Cooperative Medical Insurance

| Mean | SD   | Min  | Max   | Obs |
|------|------|------|-------|-----|
| 9.33 | 2.31 | 8.00 | 12.00 | 3   |

**exeb004\_4\_:** Reason of Stopping Participate in New Cooperative Medical Insurance

| Mean | SD   | Min  | Max  | Obs |
|------|------|------|------|-----|
| 7.00 | 0.00 | 7.00 | 7.00 | 3   |

**exeb005:** Receive Money from Any Health Insurance

| Mean | SD   | Min  | Max  | Obs |
|------|------|------|------|-----|
| 1.88 | 0.33 | 1.00 | 2.00 | 722 |

**exeb006:** How Much Is this Money

| Mean      | SD        | Min  | Max        | Obs |
|-----------|-----------|------|------------|-----|
| 14,516.44 | 52,142.33 | 0.00 | 400,000.00 | 72  |

**exec001:** Date of Last Physical Examination

|                                                         | Freq. | %      |
|---------------------------------------------------------|-------|--------|
| 1 Time of Physical Examination                          | 270   | 35.53  |
| 2 Didn't Take Physical Examination Since Last Interview | 490   | 64.47  |
| Total                                                   | 760   | 100.00 |

**exec001\_1:** Year

| Mean     | SD   | Min      | Max      | Obs |
|----------|------|----------|----------|-----|
| 2,018.23 | 1.90 | 2,000.00 | 2,020.00 | 270 |

**exec001\_2:** Month

| Mean | SD | Min | Max | Obs |
|------|----|-----|-----|-----|
|------|----|-----|-----|-----|

|      |      |      |       |     |
|------|------|------|-------|-----|
| 5.87 | 2.89 | 1.00 | 12.00 | 181 |
|------|------|------|-------|-----|

**exed030:** Times of Respondent Visited A Public Hospital, Private Hospital, or Been Visited

| Mean | SD   | Min  | Max   | Obs |
|------|------|------|-------|-----|
| 1.62 | 4.48 | 0.00 | 60.00 | 760 |

**exed031:** Total Cost

| Mean     | SD        | Min  | Max        | Obs |
|----------|-----------|------|------------|-----|
| 9,777.10 | 34,266.11 | 0.00 | 400,000.00 | 221 |

**exed031\_min:** EXED031\_min

| A String Variable |  |  |  |    |
|-------------------|--|--|--|----|
| Obs:              |  |  |  | 43 |

**exed031\_max:** EXED031\_max

| A String Variable |  |  |  |    |
|-------------------|--|--|--|----|
| Obs:              |  |  |  | 21 |

**exed032:** Cost of Self-paid

|                       | Freq. | %      |
|-----------------------|-------|--------|
| 1 Cost of Self-paid   | 205   | 74.01  |
| 2 Didn't Pay Anything | 72    | 25.99  |
| Total                 | 277   | 100.00 |

**exed032\_1:** EXED032\_1

| Mean     | SD        | Min  | Max        | Obs |
|----------|-----------|------|------------|-----|
| 7,546.54 | 32,764.23 | 1.00 | 400,000.00 | 163 |

**exed032\_1\_min:** EXED032\_1\_min

| A String Variable |  |  |  |    |
|-------------------|--|--|--|----|
| Obs:              |  |  |  | 26 |

**exed032\_1\_max:** EXED032\_1\_max

| A String Variable |  |  |  |    |
|-------------------|--|--|--|----|
| Obs:              |  |  |  | 10 |

**exed033\_s1:** XEXMIns[1]

| Mean | SD   | Min  | Max  | Obs |
|------|------|------|------|-----|
| 0.09 | 0.29 | 0.00 | 1.00 | 277 |

exed033\_s2: XEXMIns[2]

| Mean | SD   | Min  | Max  | Obs |
|------|------|------|------|-----|
| 0.15 | 0.53 | 0.00 | 2.00 | 277 |

exed033\_s3: XEXMIns[3]

| Mean | SD   | Min  | Max  | Obs |
|------|------|------|------|-----|
| 0.10 | 0.53 | 0.00 | 3.00 | 277 |

exed033\_s4: XEXMIns[4]

| Mean | SD   | Min  | Max  | Obs |
|------|------|------|------|-----|
| 1.92 | 2.00 | 0.00 | 4.00 | 277 |

exed033\_s5: XEXMIns[5]

| Mean | SD   | Min  | Max  | Obs |
|------|------|------|------|-----|
| 0.13 | 0.79 | 0.00 | 5.00 | 277 |

exed033\_s6: XEXMIns[6]

| Mean | SD   | Min  | Max  | Obs |
|------|------|------|------|-----|
| 0.04 | 0.51 | 0.00 | 6.00 | 277 |

exed033\_s7: XEXMIns[7]

| Mean | SD   | Min  | Max  | Obs |
|------|------|------|------|-----|
| 0.05 | 0.59 | 0.00 | 7.00 | 277 |

exed033\_s8: XEXMIns[8]

| Mean | SD   | Min  | Max  | Obs |
|------|------|------|------|-----|
| 0.03 | 0.48 | 0.00 | 8.00 | 277 |

exed033\_s9: XEXMIns[9]

| Mean | SD   | Min  | Max  | Obs |
|------|------|------|------|-----|
| 0.03 | 0.54 | 0.00 | 9.00 | 277 |

exed033\_s10: XEXMIns[10]

| Mean | SD   | Min  | Max  | Obs |
|------|------|------|------|-----|
| 0.00 | 0.00 | 0.00 | 0.00 | 277 |

**exed033\_s11:** XEXMIns[11]

| Mean | SD   | Min  | Max   | Obs |
|------|------|------|-------|-----|
| 0.12 | 1.14 | 0.00 | 11.00 | 277 |

**exed033\_s12:** Reimbursed by R's union

| Mean | SD   | Min  | Max  | Obs |
|------|------|------|------|-----|
| 0.00 | 0.00 | 0.00 | 0.00 | 277 |

**exed033\_s13:** No Insurance

| Mean | SD   | Min  | Max   | Obs |
|------|------|------|-------|-----|
| 0.66 | 2.85 | 0.00 | 13.00 | 277 |

**exed033\_s14:** Not Revelent to R

| Mean | SD   | Min  | Max   | Obs |
|------|------|------|-------|-----|
| 3.44 | 6.04 | 0.00 | 14.00 | 277 |

**exef001:** Take Any Purchased Medicine in the Month before Death

|       | Freq. | %      |
|-------|-------|--------|
| 1 Yes | 406   | 53.42  |
| 2 No  | 354   | 46.58  |
| Total | 760   | 100.00 |

**exef002:** Total Cost for Purchased Medicine

| Mean     | SD        | Min  | Max        | Obs |
|----------|-----------|------|------------|-----|
| 3,210.92 | 10,639.09 | 0.00 | 120,000.00 | 297 |

**exef002\_min:** EXEF002\_min

| A String Variable |    |
|-------------------|----|
| Obs:              | 75 |

**exef002\_max:** EXEF002\_max

| A String Variable |    |
|-------------------|----|
| Obs:              | 39 |



**exef003: Self-Paid**

| Mean | SD   | Min  | Max  | Obs |
|------|------|------|------|-----|
| 1.15 | 0.36 | 1.00 | 2.00 | 406 |

**exef003\_1: EXEF003\_1**

| Mean     | SD       | Min  | Max       | Obs |
|----------|----------|------|-----------|-----|
| 2,760.22 | 8,817.78 | 1.00 | 75,000.00 | 276 |

**exef003\_1\_min: EXEF003\_1\_min**

| A String Variable |  |  |  |    |
|-------------------|--|--|--|----|
| Obs:              |  |  |  | 37 |

**exef003\_1\_max: EXEF003\_1\_max**

| A String Variable |  |  |  |    |
|-------------------|--|--|--|----|
| Obs:              |  |  |  | 16 |

**exef005\_s1: XEXMIns[1]**

| Mean | SD   | Min  | Max  | Obs |
|------|------|------|------|-----|
| 0.08 | 0.27 | 0.00 | 1.00 | 406 |

**exef005\_s2: XEXMIns[2]**

| Mean | SD   | Min  | Max  | Obs |
|------|------|------|------|-----|
| 0.09 | 0.41 | 0.00 | 2.00 | 406 |

**exef005\_s3: XEXMIns[3]**

| Mean | SD   | Min  | Max  | Obs |
|------|------|------|------|-----|
| 0.05 | 0.39 | 0.00 | 3.00 | 406 |

**exef005\_s4: XEXMIns[4]**

| Mean | SD   | Min  | Max  | Obs |
|------|------|------|------|-----|
| 1.27 | 1.86 | 0.00 | 4.00 | 406 |

**exef005\_s5: XEXMIns[5]**

| Mean | SD   | Min  | Max  | Obs |
|------|------|------|------|-----|
| 0.04 | 0.43 | 0.00 | 5.00 | 406 |

**exef005\_s6: XEXMIns[6]**

| Mean | SD   | Min  | Max  | Obs |
|------|------|------|------|-----|
| 0.01 | 0.30 | 0.00 | 6.00 | 406 |

**exef005\_s7: XEXMIns[7]**

| Mean | SD   | Min  | Max  | Obs |
|------|------|------|------|-----|
| 0.03 | 0.49 | 0.00 | 7.00 | 406 |

**exef005\_s8: XEXMIns[8]**

| Mean | SD   | Min  | Max  | Obs |
|------|------|------|------|-----|
| 0.02 | 0.40 | 0.00 | 8.00 | 406 |

**exef005\_s9: XEXMIns[9]**

| Mean | SD   | Min  | Max  | Obs |
|------|------|------|------|-----|
| 0.04 | 0.63 | 0.00 | 9.00 | 406 |

**exef005\_s10: XEXMIns[10]**

| Mean | SD   | Min  | Max  | Obs |
|------|------|------|------|-----|
| 0.00 | 0.00 | 0.00 | 0.00 | 406 |

**exef005\_s11: XEXMIns[11]**

| Mean | SD   | Min  | Max   | Obs |
|------|------|------|-------|-----|
| 0.03 | 0.55 | 0.00 | 11.00 | 406 |

**exef005\_s12: Reimbursed by R's union**

| Mean | SD   | Min  | Max   | Obs |
|------|------|------|-------|-----|
| 0.03 | 0.60 | 0.00 | 12.00 | 406 |

**exef005\_s13: No Insurance**

| Mean | SD   | Min  | Max   | Obs |
|------|------|------|-------|-----|
| 1.57 | 4.24 | 0.00 | 13.00 | 406 |

**exef005\_s14: Not Revelent to R**

| Mean | SD   | Min  | Max   | Obs |
|------|------|------|-------|-----|
| 5.83 | 6.91 | 0.00 | 14.00 | 406 |

**exeg000: Dead in Hospital**

| Mean | SD   | Min  | Max  | Obs |
|------|------|------|------|-----|
| 1.82 | 0.39 | 1.00 | 2.00 | 760 |

**exeg001:** How Long Been A Patient in that Hospital before Death

| Mean | SD   | Min  | Max  | Obs |
|------|------|------|------|-----|
| 2.61 | 1.12 | 1.00 | 4.00 | 138 |

**exeg001\_1:** EXEG001\_1

| Mean | SD   | Min  | Max   | Obs |
|------|------|------|-------|-----|
| 4.48 | 5.51 | 0.00 | 20.00 | 28  |

**exeg001\_2:** EXEG001\_2

| Mean | SD   | Min  | Max  | Obs |
|------|------|------|------|-----|
| 2.72 | 1.78 | 1.00 | 6.00 | 32  |

**exeg001\_3:** EXEG001\_3

| Mean | SD   | Min  | Max  | Obs |
|------|------|------|------|-----|
| 1.94 | 0.98 | 1.00 | 4.00 | 34  |

**exeg001\_4:** EXEG001\_4

| Mean | SD   | Min  | Max  | Obs |
|------|------|------|------|-----|
| 2.65 | 2.20 | 1.00 | 9.50 | 40  |

**exeg001\_5:** EXEG001\_5

|                 |  |  |  |  |
|-----------------|--|--|--|--|
| No Observations |  |  |  |  |
|-----------------|--|--|--|--|

**exeg002:** Why Had He/She Been Admitted to the Hospital?

|                            | Freq. | %      |
|----------------------------|-------|--------|
| 1 Surgery                  | 19    | 13.77  |
| 2 Receive Other Treatments | 20    | 14.49  |
| 3 Relieve Symptoms         | 51    | 36.96  |
| 4 Others                   | 48    | 34.78  |
| Total                      | 138   | 100.00 |

**exeg003:** In Addition to that Hospital Stay, in the One Month before His/Her Death Had He/

| Mean | SD   | Min  | Max  | Obs |
|------|------|------|------|-----|
| 1.72 | 0.45 | 1.00 | 2.00 | 138 |

**exeg004:** In the One Year before His/Her Death Had He/She Been A Patient in A Hospital Ove

| Mean | SD   | Min  | Max  | Obs |
|------|------|------|------|-----|
| 1.43 | 0.50 | 1.00 | 2.00 | 760 |

**exeg005:** How Many Different Times Was He/She A Patient in A Hospital Overnight in the One

| Mean | SD   | Min  | Max   | Obs |
|------|------|------|-------|-----|
| 3.63 | 5.21 | 1.00 | 50.00 | 430 |

**exeg006:** During Any of Those Hospital Stays did R Spend any Time in An Intensive Care Uni

|       | Freq. | %      |
|-------|-------|--------|
| 1 Yes | 73    | 16.98  |
| 2 No  | 357   | 83.02  |
| Total | 430   | 100.00 |

**exeg006\_1:** EXEG006\_1

| Mean  | SD    | Min  | Max    | Obs |
|-------|-------|------|--------|-----|
| 16.39 | 28.12 | 1.00 | 180.00 | 69  |

**exeg007\_s1:** Respirator

| Mean | SD   | Min  | Max  | Obs |
|------|------|------|------|-----|
| 0.41 | 0.49 | 0.00 | 1.00 | 430 |

**exeg007\_s2:** Artificial liver

| Mean | SD   | Min  | Max  | Obs |
|------|------|------|------|-----|
| 0.04 | 0.29 | 0.00 | 2.00 | 430 |

**exeg007\_s3:** Artificial lung

| Mean | SD   | Min  | Max  | Obs |
|------|------|------|------|-----|
| 0.10 | 0.53 | 0.00 | 3.00 | 430 |

**exeg007\_s4:** None of above

| Mean | SD   | Min  | Max  | Obs |
|------|------|------|------|-----|
| 2.34 | 1.97 | 0.00 | 4.00 | 430 |

**exeg008:** During Any of Those Hospital Stays Did R Use Kidney Dialysis Services?

| Mean | SD   | Min  | Max  | Obs |
|------|------|------|------|-----|
| 1.92 | 0.27 | 1.00 | 2.00 | 430 |

**exeg009:** During Any of Those Hospital Stays did R Receive Antibiotics to Treat Pneumonia

| Mean | SD   | Min  | Max  | Obs |
|------|------|------|------|-----|
| 1.87 | 0.33 | 1.00 | 2.00 | 430 |

**exeg010:** Total Cost for Hospital Bills

| Mean      | SD        | Min  | Max        | Obs |
|-----------|-----------|------|------------|-----|
| 46,798.83 | 78,083.82 | 0.00 | 750,000.00 | 356 |

**exeg011:** Self-paid Part

| Mean | SD   | Min  | Max  | Obs |
|------|------|------|------|-----|
| 1.28 | 0.45 | 1.00 | 2.00 | 430 |

**exeg011\_1:** Self-paid Part

| Mean      | SD        | Min   | Max        | Obs |
|-----------|-----------|-------|------------|-----|
| 29,286.06 | 50,887.97 | 48.00 | 570,000.00 | 248 |

**exeg012\_s1:** XEXMIns[1]

| Mean | SD   | Min  | Max  | Obs |
|------|------|------|------|-----|
| 0.16 | 0.36 | 0.00 | 1.00 | 430 |

**exeg012\_s2:** XEXMIns[2]

| Mean | SD   | Min  | Max  | Obs |
|------|------|------|------|-----|
| 0.20 | 0.59 | 0.00 | 2.00 | 430 |

**exeg012\_s3:** XEXMIns[3]

| Mean | SD   | Min  | Max  | Obs |
|------|------|------|------|-----|
| 0.07 | 0.45 | 0.00 | 3.00 | 430 |

**exeg012\_s4:** XEXMIns[4]

| Mean | SD   | Min  | Max  | Obs |
|------|------|------|------|-----|
| 2.51 | 1.94 | 0.00 | 4.00 | 430 |

**exeg012\_s5:** XEXMIns[5]

| Mean | SD   | Min  | Max  | Obs |
|------|------|------|------|-----|
| 0.10 | 0.72 | 0.00 | 5.00 | 430 |

**exeg012\_s6: XEXMIns[6]**

| Mean | SD   | Min  | Max  | Obs |
|------|------|------|------|-----|
| 0.10 | 0.76 | 0.00 | 6.00 | 430 |

**exeg012\_s7: XEXMIns[7]**

| Mean | SD   | Min  | Max  | Obs |
|------|------|------|------|-----|
| 0.05 | 0.58 | 0.00 | 7.00 | 430 |

**exeg012\_s8: XEXMIns[8]**

| Mean | SD   | Min  | Max  | Obs |
|------|------|------|------|-----|
| 0.06 | 0.67 | 0.00 | 8.00 | 430 |

**exeg012\_s9: XEXMIns[9]**

| Mean | SD   | Min  | Max  | Obs |
|------|------|------|------|-----|
| 0.10 | 0.97 | 0.00 | 9.00 | 430 |

**exeg012\_s10: XEXMIns[10]**

| Mean | SD   | Min  | Max  | Obs |
|------|------|------|------|-----|
| 0.00 | 0.00 | 0.00 | 0.00 | 430 |

**exeg012\_s11: XEXMIns[11]**

| Mean | SD   | Min  | Max   | Obs |
|------|------|------|-------|-----|
| 0.15 | 1.29 | 0.00 | 11.00 | 430 |

**exeg012\_s12: Reimbursed by R's Union**

| Mean | SD   | Min  | Max   | Obs |
|------|------|------|-------|-----|
| 0.11 | 1.15 | 0.00 | 12.00 | 430 |

**exeg012\_s13: No Insurance**

| Mean | SD   | Min  | Max   | Obs |
|------|------|------|-------|-----|
| 0.36 | 2.14 | 0.00 | 13.00 | 430 |

**exeg012\_s14: Not Revelent to R**

| Mean | SD   | Min  | Max   | Obs |
|------|------|------|-------|-----|
| 0.46 | 2.49 | 0.00 | 14.00 | 430 |

**exf001: Time of Quitting Job**

|                              | Freq. | %      |
|------------------------------|-------|--------|
| 1 Year and Month             | 86    | 47.25  |
| 2 Worked Till Death          | 51    | 28.02  |
| 995 Denial of Working LastIW | 34    | 18.68  |
| 997 Do not Know              | 10    | 5.49   |
| 999 Refuse to Answer         | 1     | 0.55   |
| Total                        | 182   | 100.00 |

**exf001\_1: Year of Quitting Job**

| Mean     | SD     | Min   | Max      | Obs |
|----------|--------|-------|----------|-----|
| 1,948.63 | 370.58 | -1.00 | 2,020.00 | 87  |

**exf001\_2: Month of Quitting Job**

| Mean | SD   | Min   | Max   | Obs |
|------|------|-------|-------|-----|
| 6.36 | 4.10 | -1.00 | 12.00 | 87  |

**exf002: Days Worked During the Last Working Week**

| Mean | SD   | Min   | Max  | Obs |
|------|------|-------|------|-----|
| 4.59 | 3.16 | -1.00 | 7.00 | 137 |

**exf003\_1: Hours Worked Per Day During the Last Working Week**

| Mean | SD   | Min  | Max   | Obs |
|------|------|------|-------|-----|
| 5.99 | 3.81 | 1.00 | 24.00 | 137 |

**exf003\_2: Hours Worked in Farming**

| Mean | SD   | Min   | Max   | Obs |
|------|------|-------|-------|-----|
| 3.22 | 3.27 | -1.00 | 12.00 | 137 |

**exf003\_3: Hours Worked in Non-farming Activities**

| Mean | SD   | Min   | Max   | Obs |
|------|------|-------|-------|-----|
| 2.51 | 4.50 | -1.00 | 24.00 | 137 |

**exf004: Retirement Processed**

|                 | Freq. | %      |
|-----------------|-------|--------|
| 1 Yes           | 40    | 6.30   |
| 2 No            | 576   | 90.71  |
| 997 Do not Know | 19    | 2.99   |
| Total           | 635   | 100.00 |

**exf005: Inherited From Pensions**

| Mean     | SD       | Min  | Max       | Obs |
|----------|----------|------|-----------|-----|
| 2,875.76 | 9,976.69 | 0.00 | 84,000.00 | 552 |

**exf006: Receive A Lump-Sum Compensation From Pensions**

|       | Freq. | %      |
|-------|-------|--------|
| 1 Yes | 193   | 25.39  |
| 2 No  | 567   | 74.61  |
| Total | 760   | 100.00 |

**exf007: How Much Was It**

| Mean      | SD        | Min   | Max        | Obs |
|-----------|-----------|-------|------------|-----|
| 23,257.92 | 45,305.97 | 80.00 | 400,000.00 | 157 |

**exf008: Receive A Lump-sum Compensation From Other Places?**

|       | Freq. | %      |
|-------|-------|--------|
| 1 Yes | 87    | 11.45  |
| 2 No  | 673   | 88.55  |
| Total | 760   | 100.00 |

**exf009: How Much Was It**

| Mean     | SD        | Min    | Max        | Obs |
|----------|-----------|--------|------------|-----|
| 9,611.04 | 25,147.96 | 300.00 | 185,000.00 | 77  |

**exf010: Was R Insured By Life Insurance?**

|       | Freq. | %      |
|-------|-------|--------|
| 1 Yes | 28    | 3.68   |
| 2 No  | 732   | 96.32  |
| Total | 760   | 100.00 |

**exf011: How Much Did the Life Insurance Pay Upon the Death of R**

| Mean      | SD        | Min      | Max        | Obs |
|-----------|-----------|----------|------------|-----|
| 24,650.00 | 35,171.42 | 1,000.00 | 150,000.00 | 18  |



**exf012: Did R Have Commercial Pension?**

|       | Freq. | %      |
|-------|-------|--------|
| 1 Yes | 6     | 0.79   |
| 2 No  | 754   | 99.21  |
| Total | 760   | 100.00 |

**exf013: How Much Have Been Inherited From Commercial Pension?**

| Mean      | SD        | Min       | Max       | Obs |
|-----------|-----------|-----------|-----------|-----|
| 23,875.00 | 17,890.29 | 10,000.00 | 50,000.00 | 4   |

**exg001: Own House**

|       | Freq. | %      |
|-------|-------|--------|
| 1 Yes | 331   | 43.55  |
| 2 No  | 429   | 56.45  |
| Total | 760   | 100.00 |

**exg001\_1: Total Value of House Properties**

| Mean       | SD         | Min   | Max          | Obs |
|------------|------------|-------|--------------|-----|
| 109,691.54 | 503,275.20 | -1.00 | 8,000,000.00 | 331 |

**exg002\_s1: House Disposed: Spouse**

|       | Freq. | %      |
|-------|-------|--------|
| 0 No  | 263   | 79.46  |
| 1 Yes | 68    | 20.54  |
| Total | 331   | 100.00 |

**exg002\_s2: House Disposed: Children/Sons-in-law/Daughters-in-law**

|       | Freq. | %      |
|-------|-------|--------|
| 0 No  | 189   | 57.10  |
| 2 Yes | 142   | 42.90  |
| Total | 331   | 100.00 |

**exg002\_s3: House Disposed: Sibling**

|       | Freq. | %      |
|-------|-------|--------|
| 0 No  | 326   | 98.49  |
| 3 Yes | 5     | 1.51   |
| Total | 331   | 100.00 |

**exg002\_s4: House Disposed: Other Relatives**

|  | Freq. | % |
|--|-------|---|
|--|-------|---|

|       |     |        |
|-------|-----|--------|
| 0 No  | 328 | 99.09  |
| 4 Yes | 3   | 0.91   |
| Total | 331 | 100.00 |

**exg002\_s5: House Disposed: Parents/Parents-in-laws**

|       | Freq. | %      |
|-------|-------|--------|
| 0 No  | 331   | 100.00 |
| Total | 331   | 100.00 |

**exg002\_s6: House Disposed: Grandchildren**

|       | Freq. | %      |
|-------|-------|--------|
| 0 No  | 325   | 98.19  |
| 6 Yes | 6     | 1.81   |
| Total | 331   | 100.00 |

**exg002\_s7: House Disposed: Friends**

|       | Freq. | %      |
|-------|-------|--------|
| 0 No  | 331   | 100.00 |
| Total | 331   | 100.00 |

**exg002\_s8: House Disposed: Charity**

|       | Freq. | %      |
|-------|-------|--------|
| 0 No  | 331   | 100.00 |
| Total | 331   | 100.00 |

**exg002\_s9: House Disposed: Others**

|       | Freq. | %      |
|-------|-------|--------|
| 0 No  | 325   | 98.19  |
| 9 Yes | 6     | 1.81   |
| Total | 331   | 100.00 |

**exg002\_s10: House Disposed: No Allocation**

|        | Freq. | %      |
|--------|-------|--------|
| 0 No   | 221   | 66.77  |
| 10 Yes | 110   | 33.23  |
| Total  | 331   | 100.00 |

**exg002\_1: House Disposed: Spouse(%)**

| Mean  | SD    | Min   | Max    | Obs |
|-------|-------|-------|--------|-----|
| 88.91 | 25.41 | -1.00 | 100.00 | 68  |

**exg002\_3: House Disposed: Sibling(%)**

| Mean  | SD    | Min   | Max    | Obs |
|-------|-------|-------|--------|-----|
| 90.00 | 22.36 | 50.00 | 100.00 | 5   |

**exg002\_4: House Disposed: Other Relatives(%)**

| Mean   | SD   | Min    | Max    | Obs |
|--------|------|--------|--------|-----|
| 100.00 | 0.00 | 100.00 | 100.00 | 3   |

**exg002\_5: House Disposed: Parents/Parents-in-laws(%)**

|                 |
|-----------------|
| No Observations |
|-----------------|

**exg002\_7: House Disposed: Friends(%)**

|                 |
|-----------------|
| No Observations |
|-----------------|

**exg002\_8: House Disposed: Charity(%)**

|                 |
|-----------------|
| No Observations |
|-----------------|

**exg002\_9: House Disposed: Others(%)**

| Mean  | SD    | Min   | Max    | Obs |
|-------|-------|-------|--------|-----|
| 32.67 | 52.16 | -1.00 | 100.00 | 6   |

**exg003\_s1: House Disposed: Child[1]/'s Spouse**

|       | Freq. | %      |
|-------|-------|--------|
| 0 No  | 57    | 40.14  |
| 1 Yes | 85    | 59.86  |
| Total | 142   | 100.00 |

**exg003\_s2: House Disposed: Child[2]/'s Spouse**

|       | Freq. | %      |
|-------|-------|--------|
| 0 No  | 101   | 71.13  |
| 2 Yes | 41    | 28.87  |
| Total | 142   | 100.00 |

**exg003\_s3: House Disposed: Child[3]/'s Spouse**

|       | Freq. | %      |
|-------|-------|--------|
| 0 No  | 119   | 83.80  |
| 3 Yes | 23    | 16.20  |
| Total | 142   | 100.00 |

**exg003\_s4: House Disposed: Child[4]/'s Spouse**

|       | Freq. | %      |
|-------|-------|--------|
| 0 No  | 129   | 90.85  |
| 4 Yes | 13    | 9.15   |
| Total | 142   | 100.00 |

**exg003\_s5: House Disposed: Child[5]/'s Spouse**

|       | Freq. | %      |
|-------|-------|--------|
| 0 No  | 133   | 93.66  |
| 5 Yes | 9     | 6.34   |
| Total | 142   | 100.00 |

**exg003\_s6: House Disposed: Child[6]/'s Spouse**

|       | Freq. | %      |
|-------|-------|--------|
| 0 No  | 141   | 99.30  |
| 6 Yes | 1     | 0.70   |
| Total | 142   | 100.00 |

**exg003\_s7: House Disposed: Child[7]/'s Spouse**

|       | Freq. | %      |
|-------|-------|--------|
| 0 No  | 142   | 100.00 |
| Total | 142   | 100.00 |

**exg003\_s8: House Disposed: Child[8]/'s Spouse**

|       | Freq. | %      |
|-------|-------|--------|
| 0 No  | 142   | 100.00 |
| Total | 142   | 100.00 |

**exg003\_s9: House Disposed: Child[9]/'s Spouse**

|       | Freq. | %      |
|-------|-------|--------|
| 0 No  | 142   | 100.00 |
| Total | 142   | 100.00 |

**exg003\_s10: House Disposed: Child[10]/'s Spouse**

|       | Freq. | %      |
|-------|-------|--------|
| 0 No  | 142   | 100.00 |
| Total | 142   | 100.00 |

**exg003\_s11: House Disposed: Child[11]/'s Spouse**

|       | Freq. | %      |
|-------|-------|--------|
| 0 No  | 142   | 100.00 |
| Total | 142   | 100.00 |

**exg003\_s12:** House Disposed: Child[12]/s Spouse

|       | Freq. | %      |
|-------|-------|--------|
| 0 No  | 142   | 100.00 |
| Total | 142   | 100.00 |

**exg003\_s13:** House Disposed: Child[13]/s Spouse

|       | Freq. | %      |
|-------|-------|--------|
| 0 No  | 142   | 100.00 |
| Total | 142   | 100.00 |

**exg003\_s14:** House Disposed: Child[14]/s Spouse

|       | Freq. | %      |
|-------|-------|--------|
| 0 No  | 142   | 100.00 |
| Total | 142   | 100.00 |

**exg003\_s15:** House Disposed: Child[15]/s Spouse

|       | Freq. | %      |
|-------|-------|--------|
| 0 No  | 142   | 100.00 |
| Total | 142   | 100.00 |

**exg003\_s16:** House Disposed: Child[16]/s Spouse

|       | Freq. | %      |
|-------|-------|--------|
| 0 No  | 142   | 100.00 |
| Total | 142   | 100.00 |

**exg003\_s17:** House Disposed: Child[17]/s Spouse

|       | Freq. | %      |
|-------|-------|--------|
| 0 No  | 142   | 100.00 |
| Total | 142   | 100.00 |

**exg003\_s18:** House Disposed: Child[18]/s Spouse

|       | Freq. | %      |
|-------|-------|--------|
| 0 No  | 142   | 100.00 |
| Total | 142   | 100.00 |

**exg003\_s19:** House Disposed: Child[19]/'s Spouse

|       | Freq. | %      |
|-------|-------|--------|
| 0 No  | 142   | 100.00 |
| Total | 142   | 100.00 |

**exg003\_s20:** House Disposed: Child[20]/'s Spouse

|       | Freq. | %      |
|-------|-------|--------|
| 0 No  | 142   | 100.00 |
| Total | 142   | 100.00 |

**exg003\_s21:** House Disposed: Child[21]/'s Spouse

|       | Freq. | %      |
|-------|-------|--------|
| 0 No  | 142   | 100.00 |
| Total | 142   | 100.00 |

**exg003\_s22:** House Disposed: Child[22]/'s Spouse

|       | Freq. | %      |
|-------|-------|--------|
| 0 No  | 142   | 100.00 |
| Total | 142   | 100.00 |

**exg003\_s23:** House Disposed: Child[23]/'s Spouse

|       | Freq. | %      |
|-------|-------|--------|
| 0 No  | 142   | 100.00 |
| Total | 142   | 100.00 |

**exg003\_s24:** House Disposed: Child[24]/'s Spouse

|       | Freq. | %      |
|-------|-------|--------|
| 0 No  | 142   | 100.00 |
| Total | 142   | 100.00 |

**exg003\_s25:** House Disposed: Child[25]/'s Spouse

|       | Freq. | %      |
|-------|-------|--------|
| 0 No  | 142   | 100.00 |
| Total | 142   | 100.00 |

**exg003\_s26:** House Disposed: Other Child[26]/'s Spouse

|        | Freq. | %     |
|--------|-------|-------|
| 0 No   | 131   | 92.25 |
| 26 Yes | 11    | 7.75  |

|       |     |        |
|-------|-----|--------|
| Total | 142 | 100.00 |
|-------|-----|--------|

**exg003\_s27: House Disposed: Other Child[27]/'s Spouse**

|       | Freq. | %      |
|-------|-------|--------|
| 0 No  | 142   | 100.00 |
| Total | 142   | 100.00 |

**exg003\_s28: House Disposed: Other Child[28]/'s Spouse**

|       | Freq. | %      |
|-------|-------|--------|
| 0 No  | 142   | 100.00 |
| Total | 142   | 100.00 |

**exg003\_s29: House Disposed: Other Child[29]/'s Spouse**

|       | Freq. | %      |
|-------|-------|--------|
| 0 No  | 142   | 100.00 |
| Total | 142   | 100.00 |

**exg003\_s30: House Disposed: Other Child[30]/'s Spouse**

|       | Freq. | %      |
|-------|-------|--------|
| 0 No  | 142   | 100.00 |
| Total | 142   | 100.00 |

**exg003\_s31: House Disposed: Other Child[31]/'s Spouse**

|       | Freq. | %      |
|-------|-------|--------|
| 0 No  | 142   | 100.00 |
| Total | 142   | 100.00 |

**exg003\_s32: House Disposed: Other Child[32]/'s Spouse**

|       | Freq. | %      |
|-------|-------|--------|
| 0 No  | 142   | 100.00 |
| Total | 142   | 100.00 |

**exg003\_s33: House Disposed: Other Child[33]/'s Spouse**

|       | Freq. | %      |
|-------|-------|--------|
| 0 No  | 142   | 100.00 |
| Total | 142   | 100.00 |

**exg003\_s34: House Disposed: Other Child[34]/'s Spouse**

|  | Freq. | % |
|--|-------|---|
|--|-------|---|

|       |     |        |
|-------|-----|--------|
| 0 No  | 142 | 100.00 |
| Total | 142 | 100.00 |

### exg003\_s35: House Disposed: Other Child[35]/'s Spouse

|       | Freq. | %      |
|-------|-------|--------|
| 0 No  | 142   | 100.00 |
| Total | 142   | 100.00 |

### exg004\_1\_: House Disposed: Child[1]/'s Spouse(%)

| Mean  | SD    | Min   | Max    | Obs |
|-------|-------|-------|--------|-----|
| 81.85 | 31.00 | -1.00 | 100.00 | 85  |

### exg004\_2\_: House Disposed: Child[2]/'s Spouse(%)

| Mean  | SD    | Min   | Max    | Obs |
|-------|-------|-------|--------|-----|
| 54.43 | 36.55 | -1.00 | 100.00 | 41  |

### exg004\_3\_: House Disposed: Child[3]/'s Spouse(%)

| Mean  | SD    | Min   | Max    | Obs |
|-------|-------|-------|--------|-----|
| 58.62 | 41.27 | -1.00 | 100.00 | 23  |

### exg004\_4\_: House Disposed: Child[4]/'s Spouse(%)

| Mean  | SD    | Min   | Max    | Obs |
|-------|-------|-------|--------|-----|
| 74.46 | 41.66 | -1.00 | 100.00 | 13  |

### exg004\_5\_: House Disposed: Child[5]/'s Spouse(%)

| Mean  | SD    | Min   | Max    | Obs |
|-------|-------|-------|--------|-----|
| 57.67 | 50.59 | -1.00 | 100.00 | 9   |

### exg004\_6\_: House Disposed: Child[6]/'s Spouse(%)

| Mean  | SD | Min   | Max   | Obs |
|-------|----|-------|-------|-----|
| -1.00 | .  | -1.00 | -1.00 | 1   |

### exg004\_26\_: House Disposed: Other Child[26]/'s Spouse(%)

| Mean  | SD    | Min   | Max    | Obs |
|-------|-------|-------|--------|-----|
| 86.36 | 23.35 | 50.00 | 100.00 | 11  |

### exg004\_27\_: House Disposed: Other Child[27]/'s Spouse(%)



---

No Observations

---

**exg007\_s1:** House Disposed: Child[1]'s Children

|       | Freq. | %      |
|-------|-------|--------|
| 0 No  | 5     | 83.33  |
| 1 Yes | 1     | 16.67  |
| Total | 6     | 100.00 |

**exg007\_s2:** House Disposed: Child[2]'s Children

|       | Freq. | %      |
|-------|-------|--------|
| 0 No  | 4     | 66.67  |
| 2 Yes | 2     | 33.33  |
| Total | 6     | 100.00 |

**exg007\_s3:** House Disposed: Child[3]'s Children

|       | Freq. | %      |
|-------|-------|--------|
| 0 No  | 6     | 100.00 |
| Total | 6     | 100.00 |

**exg007\_s4:** House Disposed: Child[4]'s Children

|       | Freq. | %      |
|-------|-------|--------|
| 0 No  | 5     | 83.33  |
| 4 Yes | 1     | 16.67  |
| Total | 6     | 100.00 |

**exg007\_s5:** House Disposed: Child[5]'s Children

|       | Freq. | %      |
|-------|-------|--------|
| 0 No  | 6     | 100.00 |
| Total | 6     | 100.00 |

**exg007\_s6:** House Disposed: Child[6]'s Children

|       | Freq. | %      |
|-------|-------|--------|
| 0 No  | 6     | 100.00 |
| Total | 6     | 100.00 |

**exg007\_s7:** House Disposed: Child[7]'s Children

|       | Freq. | %      |
|-------|-------|--------|
| 0 No  | 6     | 100.00 |
| Total | 6     | 100.00 |

**exg007\_s8:** House Disposed: Child[8]'s Children

|       | Freq. | %      |
|-------|-------|--------|
| 0 No  | 6     | 100.00 |
| Total | 6     | 100.00 |

**exg007\_s9:** House Disposed: Child[9]'s Children

|       | Freq. | %      |
|-------|-------|--------|
| 0 No  | 6     | 100.00 |
| Total | 6     | 100.00 |

**exg007\_s10:** House Disposed: Child[10]'s Children

|       | Freq. | %      |
|-------|-------|--------|
| 0 No  | 6     | 100.00 |
| Total | 6     | 100.00 |

**exg007\_s11:** House Disposed: Child[11]'s Children

|       | Freq. | %      |
|-------|-------|--------|
| 0 No  | 6     | 100.00 |
| Total | 6     | 100.00 |

**exg007\_s12:** House Disposed: Child[12]'s Children

|       | Freq. | %      |
|-------|-------|--------|
| 0 No  | 6     | 100.00 |
| Total | 6     | 100.00 |

**exg007\_s13:** House Disposed: Child[13]'s Children

|       | Freq. | %      |
|-------|-------|--------|
| 0 No  | 6     | 100.00 |
| Total | 6     | 100.00 |

**exg007\_s14:** House Disposed: Child[14]'s Children

|       | Freq. | %      |
|-------|-------|--------|
| 0 No  | 6     | 100.00 |
| Total | 6     | 100.00 |

**exg007\_s15:** House Disposed: Child[15]'s Children

|       | Freq. | %      |
|-------|-------|--------|
| 0 No  | 6     | 100.00 |
| Total | 6     | 100.00 |

**exg007\_s16:** House Disposed: Child[16]'s Children

|       | Freq. | %      |
|-------|-------|--------|
| 0 No  | 6     | 100.00 |
| Total | 6     | 100.00 |

**exg007\_s17:** House Disposed: Child[17]'s Children

|       | Freq. | %      |
|-------|-------|--------|
| 0 No  | 6     | 100.00 |
| Total | 6     | 100.00 |

**exg007\_s18:** House Disposed: Child[18]'s Children

|       | Freq. | %      |
|-------|-------|--------|
| 0 No  | 6     | 100.00 |
| Total | 6     | 100.00 |

**exg007\_s19:** House Disposed: Child[19]'s Children

|       | Freq. | %      |
|-------|-------|--------|
| 0 No  | 6     | 100.00 |
| Total | 6     | 100.00 |

**exg007\_s20:** House Disposed: Child[20]'s Children

|       | Freq. | %      |
|-------|-------|--------|
| 0 No  | 6     | 100.00 |
| Total | 6     | 100.00 |

**exg007\_s21:** House Disposed: Child[21]'s Children

|       | Freq. | %      |
|-------|-------|--------|
| 0 No  | 6     | 100.00 |
| Total | 6     | 100.00 |

**exg007\_s22:** House Disposed: Child[22]'s Children

|       | Freq. | %      |
|-------|-------|--------|
| 0 No  | 6     | 100.00 |
| Total | 6     | 100.00 |

**exg007\_s23:** House Disposed: Child[23]'s Children

|       | Freq. | %      |
|-------|-------|--------|
| 0 No  | 6     | 100.00 |
| Total | 6     | 100.00 |

**exg007\_s24:** House Disposed: Child[24]'s Children

|       | Freq. | %      |
|-------|-------|--------|
| 0 No  | 6     | 100.00 |
| Total | 6     | 100.00 |

**exg007\_s25:** House Disposed: Child[25]'s Children

|       | Freq. | %      |
|-------|-------|--------|
| 0 No  | 6     | 100.00 |
| Total | 6     | 100.00 |

**exg007\_s26:** House Disposed: Other Child[26]'s Children

|        | Freq. | %      |
|--------|-------|--------|
| 0 No   | 4     | 66.67  |
| 26 Yes | 2     | 33.33  |
| Total  | 6     | 100.00 |

**exg007\_s27:** House Disposed: Other Child[27]'s Children

|       | Freq. | %      |
|-------|-------|--------|
| 0 No  | 6     | 100.00 |
| Total | 6     | 100.00 |

**exg007\_s28:** House Disposed: Other Child[28]'s Children

|       | Freq. | %      |
|-------|-------|--------|
| 0 No  | 6     | 100.00 |
| Total | 6     | 100.00 |

**exg007\_s29:** House Disposed: Other Child[29]'s Children

|       | Freq. | %      |
|-------|-------|--------|
| 0 No  | 6     | 100.00 |
| Total | 6     | 100.00 |

**exg007\_s30:** House Disposed: Other Child[30]'s Children

|       | Freq. | %      |
|-------|-------|--------|
| 0 No  | 6     | 100.00 |
| Total | 6     | 100.00 |

**exg007\_s31:** House Disposed: Other Child[31]'s Children

|      | Freq. | %      |
|------|-------|--------|
| 0 No | 6     | 100.00 |

|       |   |        |
|-------|---|--------|
| Total | 6 | 100.00 |
|-------|---|--------|

**exg007\_s32:** House Disposed: Other Child[32]'s Children

|       | Freq. | %      |
|-------|-------|--------|
| 0 No  | 6     | 100.00 |
| Total | 6     | 100.00 |

**exg007\_s33:** House Disposed: Other Child[33]'s Children

|       | Freq. | %      |
|-------|-------|--------|
| 0 No  | 6     | 100.00 |
| Total | 6     | 100.00 |

**exg007\_s34:** House Disposed: Other Child[34]'s Children

|       | Freq. | %      |
|-------|-------|--------|
| 0 No  | 6     | 100.00 |
| Total | 6     | 100.00 |

**exg007\_s35:** House Disposed: Other Child[35]'s Children

|       | Freq. | %      |
|-------|-------|--------|
| 0 No  | 6     | 100.00 |
| Total | 6     | 100.00 |

**exg008\_1\_:** House Disposed: Child[1]'s Children(%)

| Mean   | SD | Min    | Max    | Obs |
|--------|----|--------|--------|-----|
| 100.00 | .  | 100.00 | 100.00 | 1   |

**exg008\_2\_:** House Disposed: Child[2]'s Children(%)

| Mean   | SD   | Min    | Max    | Obs |
|--------|------|--------|--------|-----|
| 100.00 | 0.00 | 100.00 | 100.00 | 2   |

**exg008\_3\_:** House Disposed: Child[3]'s Children(%)

|                 |
|-----------------|
| No Observations |
|-----------------|

**exg008\_4\_:** House Disposed: Child[4]'s Children(%)

| Mean   | SD | Min    | Max    | Obs |
|--------|----|--------|--------|-----|
| 100.00 | .  | 100.00 | 100.00 | 1   |

**exg008\_26\_:** House Disposed: Other Child[26]'s Children(%)

| Mean  | SD    | Min   | Max    | Obs |
|-------|-------|-------|--------|-----|
| 75.00 | 35.36 | 50.00 | 100.00 | 2   |

**exg009: Cash Left**

|       | Freq. | %      |
|-------|-------|--------|
| 1 Yes | 167   | 21.97  |
| 2 No  | 593   | 78.03  |
| Total | 760   | 100.00 |

**exg010: Cash Amount**

| Mean      | SD        | Min   | Max        | Obs |
|-----------|-----------|-------|------------|-----|
| 10,930.83 | 49,402.54 | -1.00 | 600,000.00 | 167 |

**exg011: Deposit**

|       | Freq. | %      |
|-------|-------|--------|
| 1 Yes | 113   | 14.87  |
| 2 No  | 647   | 85.13  |
| Total | 760   | 100.00 |

**exg012: Deposit Amount**

| Mean      | SD        | Min   | Max        | Obs |
|-----------|-----------|-------|------------|-----|
| 54,379.81 | 99,445.32 | -1.00 | 600,000.00 | 113 |

**exg013: Financial Asset**

|       | Freq. | %      |
|-------|-------|--------|
| 1 Yes | 3     | 0.39   |
| 2 No  | 757   | 99.61  |
| Total | 760   | 100.00 |

**exg014: Financial Asset Amount**

| Mean      | SD        | Min      | Max       | Obs |
|-----------|-----------|----------|-----------|-----|
| 13,833.33 | 14,631.59 | 1,500.00 | 30,000.00 | 3   |

**exg015: In-kind**

|       | Freq. | %      |
|-------|-------|--------|
| 1 Yes | 125   | 16.45  |
| 2 No  | 635   | 83.55  |
| Total | 760   | 100.00 |

**exg016: Value of In-kind**

| Mean      | SD        | Min   | Max        | Obs |
|-----------|-----------|-------|------------|-----|
| 10,588.25 | 23,912.15 | -1.00 | 150,000.00 | 125 |

**exg017: Value of Other Legacy**

| Mean  | SD     | Min   | Max       | Obs |
|-------|--------|-------|-----------|-----|
| 46.68 | 666.86 | -1.00 | 14,000.00 | 760 |

**exg018: Total Value Correct**

|       | Freq. | %      |
|-------|-------|--------|
| 1 Yes | 695   | 91.45  |
| 2 No  | 65    | 8.55   |
| Total | 760   | 100.00 |

**exg018\_1: The Correct Total Value**

| Mean      | SD        | Min   | Max        | Obs |
|-----------|-----------|-------|------------|-----|
| 30,669.55 | 87,425.53 | -1.00 | 600,000.00 | 65  |

**exg019: Make a Will**

|       | Freq. | %      |
|-------|-------|--------|
| 1 Yes | 19    | 2.50   |
| 2 No  | 741   | 97.50  |
| Total | 760   | 100.00 |

**exg020: Was Will Notarized**

|       | Freq. | %      |
|-------|-------|--------|
| 1 Yes | 2     | 10.53  |
| 2 No  | 17    | 89.47  |
| Total | 19    | 100.00 |

**exg021\_s1: Estate Planning: Spouse**

|       | Freq. | %      |
|-------|-------|--------|
| 0 No  | 18    | 94.74  |
| 1 Yes | 1     | 5.26   |
| Total | 19    | 100.00 |

**exg021\_s2: Estate Planning: Children/Sons-in-law/Daughters-in-law**

|      | Freq. | %     |
|------|-------|-------|
| 0 No | 5     | 26.32 |

|       |    |        |
|-------|----|--------|
| 2 Yes | 14 | 73.68  |
| Total | 19 | 100.00 |

### exg021\_s3: Estate Planning: Sibling

|       | Freq. | %      |
|-------|-------|--------|
| 0 No  | 19    | 100.00 |
| Total | 19    | 100.00 |

### exg021\_s4: Estate Planning: Other Relatives

|       | Freq. | %      |
|-------|-------|--------|
| 0 No  | 19    | 100.00 |
| Total | 19    | 100.00 |

### exg021\_s5: Estate Planning: Parents/Parents-in-law

|       | Freq. | %      |
|-------|-------|--------|
| 0 No  | 19    | 100.00 |
| Total | 19    | 100.00 |

### exg021\_s6: Estate Planning: Grandchildren

|       | Freq. | %      |
|-------|-------|--------|
| 0 No  | 17    | 89.47  |
| 6 Yes | 2     | 10.53  |
| Total | 19    | 100.00 |

### exg021\_s7: Estate Planning: Friends

|       | Freq. | %      |
|-------|-------|--------|
| 0 No  | 19    | 100.00 |
| Total | 19    | 100.00 |

### exg021\_s8: Estate Planning: Charity

|       | Freq. | %      |
|-------|-------|--------|
| 0 No  | 19    | 100.00 |
| Total | 19    | 100.00 |

### exg021\_s9: Estate Planning: Others

|       | Freq. | %      |
|-------|-------|--------|
| 0 No  | 18    | 94.74  |
| 9 Yes | 1     | 5.26   |
| Total | 19    | 100.00 |

### exg021\_s10: Estate Planning: No Arrangement



|        | Freq. | %      |
|--------|-------|--------|
| 0 No   | 15    | 78.95  |
| 10 Yes | 4     | 21.05  |
| Total  | 19    | 100.00 |

**exg021\_1: Estate Planning: Spouse(%)**

| Mean  | SD | Min   | Max   | Obs |
|-------|----|-------|-------|-----|
| 20.00 | .  | 20.00 | 20.00 | 1   |

**exg021\_3: Estate Planning: Sibling(%)**

|                 |
|-----------------|
| No Observations |
|-----------------|

**exg021\_4: Estate Planning: Other Relatives(%)**

|                 |
|-----------------|
| No Observations |
|-----------------|

**exg021\_5: Estate Planning: Parents/Parents-in-law(%)**

|                 |
|-----------------|
| No Observations |
|-----------------|

**exg021\_7: Estate Planning: Friends(%)**

|                 |
|-----------------|
| No Observations |
|-----------------|

**exg021\_8: Estate Planning: Charity(%)**

|                 |
|-----------------|
| No Observations |
|-----------------|

**exg021\_9: Estate Planning: Others(%)**

| Mean   | SD | Min    | Max    | Obs |
|--------|----|--------|--------|-----|
| 100.00 | .  | 100.00 | 100.00 | 1   |

**exg022\_s1: Estate Planning: Child[1]/'s Spouse**

|       | Freq. | %      |
|-------|-------|--------|
| 0 No  | 4     | 28.57  |
| 1 Yes | 10    | 71.43  |
| Total | 14    | 100.00 |

**exg022\_s2: Estate Planning: Child[2]/'s Spouse**

|      | Freq. | %     |
|------|-------|-------|
| 0 No | 8     | 57.14 |

|       |    |        |
|-------|----|--------|
| 2 Yes | 6  | 42.86  |
| Total | 14 | 100.00 |

**exg022\_s3: Estate Planning: Child[3]/'s Spouse**

|       | Freq. | %      |
|-------|-------|--------|
| 0 No  | 10    | 71.43  |
| 3 Yes | 4     | 28.57  |
| Total | 14    | 100.00 |

**exg022\_s4: Estate Planning: Child[4]/'s Spouse**

|       | Freq. | %      |
|-------|-------|--------|
| 0 No  | 9     | 64.29  |
| 4 Yes | 5     | 35.71  |
| Total | 14    | 100.00 |

**exg022\_s5: Estate Planning: Child[5]/'s Spouse**

|       | Freq. | %      |
|-------|-------|--------|
| 0 No  | 13    | 92.86  |
| 5 Yes | 1     | 7.14   |
| Total | 14    | 100.00 |

**exg022\_s6: Estate Planning: Child[6]/'s Spouse**

|       | Freq. | %      |
|-------|-------|--------|
| 0 No  | 14    | 100.00 |
| Total | 14    | 100.00 |

**exg022\_s7: Estate Planning: Child[7]/'s Spouse**

|       | Freq. | %      |
|-------|-------|--------|
| 0 No  | 14    | 100.00 |
| Total | 14    | 100.00 |

**exg022\_s8: Estate Planning: Child[8]/'s Spouse**

|       | Freq. | %      |
|-------|-------|--------|
| 0 No  | 14    | 100.00 |
| Total | 14    | 100.00 |

**exg022\_s9: Estate Planning: Child[9]/'s Spouse**

|       | Freq. | %      |
|-------|-------|--------|
| 0 No  | 14    | 100.00 |
| Total | 14    | 100.00 |

**exg022\_s10:** Estate Planning: Child[10]/'s Spouse

|       | Freq. | %      |
|-------|-------|--------|
| 0 No  | 14    | 100.00 |
| Total | 14    | 100.00 |

**exg022\_s11:** Estate Planning: Child[11]/'s Spouse

|       | Freq. | %      |
|-------|-------|--------|
| 0 No  | 14    | 100.00 |
| Total | 14    | 100.00 |

**exg022\_s12:** Estate Planning: Child[12]/'s Spouse

|       | Freq. | %      |
|-------|-------|--------|
| 0 No  | 14    | 100.00 |
| Total | 14    | 100.00 |

**exg022\_s13:** Estate Planning: Child[13]/'s Spouse

|       | Freq. | %      |
|-------|-------|--------|
| 0 No  | 14    | 100.00 |
| Total | 14    | 100.00 |

**exg022\_s14:** Estate Planning: Child[14]/'s Spouse

|       | Freq. | %      |
|-------|-------|--------|
| 0 No  | 14    | 100.00 |
| Total | 14    | 100.00 |

**exg022\_s15:** Estate Planning: Child[15]/'s Spouse

|       | Freq. | %      |
|-------|-------|--------|
| 0 No  | 14    | 100.00 |
| Total | 14    | 100.00 |

**exg022\_s16:** Estate Planning: Child[16]/'s Spouse

|       | Freq. | %      |
|-------|-------|--------|
| 0 No  | 14    | 100.00 |
| Total | 14    | 100.00 |

**exg022\_s17:** Estate Planning: Child[17]/'s Spouse

|       | Freq. | %      |
|-------|-------|--------|
| 0 No  | 14    | 100.00 |
| Total | 14    | 100.00 |

**exg022\_s18: Estate Planning: Child[18]/s Spouse**

|       | Freq. | %      |
|-------|-------|--------|
| 0 No  | 14    | 100.00 |
| Total | 14    | 100.00 |

**exg022\_s19: Estate Planning: Child[19]/s Spouse**

|       | Freq. | %      |
|-------|-------|--------|
| 0 No  | 14    | 100.00 |
| Total | 14    | 100.00 |

**exg022\_s20: Estate Planning: Child[20]/s Spouse**

|       | Freq. | %      |
|-------|-------|--------|
| 0 No  | 14    | 100.00 |
| Total | 14    | 100.00 |

**exg022\_s21: Estate Planning: Child[21]/s Spouse**

|       | Freq. | %      |
|-------|-------|--------|
| 0 No  | 14    | 100.00 |
| Total | 14    | 100.00 |

**exg022\_s22: Estate Planning: Child[22]/s Spouse**

|       | Freq. | %      |
|-------|-------|--------|
| 0 No  | 14    | 100.00 |
| Total | 14    | 100.00 |

**exg022\_s23: Estate Planning: Child[23]/s Spouse**

|       | Freq. | %      |
|-------|-------|--------|
| 0 No  | 14    | 100.00 |
| Total | 14    | 100.00 |

**exg022\_s24: Estate Planning: Child[24]/s Spouse**

|       | Freq. | %      |
|-------|-------|--------|
| 0 No  | 14    | 100.00 |
| Total | 14    | 100.00 |

**exg022\_s25: Estate Planning: Child[25]/s Spouse**

|       | Freq. | %      |
|-------|-------|--------|
| 0 No  | 14    | 100.00 |
| Total | 14    | 100.00 |

**exg022\_s26:** Estate Planning: Other Child[26]/'s Spouse

|       | Freq. | %      |
|-------|-------|--------|
| 0 No  | 14    | 100.00 |
| Total | 14    | 100.00 |

**exg022\_s27:** Estate Planning: Other Child[27]/'s Spouse

|       | Freq. | %      |
|-------|-------|--------|
| 0 No  | 14    | 100.00 |
| Total | 14    | 100.00 |

**exg022\_s28:** Estate Planning: Other Child[28]/'s Spouse

|       | Freq. | %      |
|-------|-------|--------|
| 0 No  | 14    | 100.00 |
| Total | 14    | 100.00 |

**exg022\_s29:** Estate Planning: Other Child[29]/'s Spouse

|       | Freq. | %      |
|-------|-------|--------|
| 0 No  | 14    | 100.00 |
| Total | 14    | 100.00 |

**exg022\_s30:** Estate Planning: Other Child[30]/'s Spouse

|       | Freq. | %      |
|-------|-------|--------|
| 0 No  | 14    | 100.00 |
| Total | 14    | 100.00 |

**exg022\_s31:** Estate Planning: Other Child[31]/'s Spouse

|       | Freq. | %      |
|-------|-------|--------|
| 0 No  | 14    | 100.00 |
| Total | 14    | 100.00 |

**exg022\_s32:** Estate Planning: Other Child[32]/'s Spouse

|       | Freq. | %      |
|-------|-------|--------|
| 0 No  | 14    | 100.00 |
| Total | 14    | 100.00 |

**exg022\_s33:** Estate Planning: Other Child[33]/'s Spouse

|       | Freq. | %      |
|-------|-------|--------|
| 0 No  | 14    | 100.00 |
| Total | 14    | 100.00 |

**exg022\_s34: Estate Planning: Other Child[34]/s Spouse**

|       | Freq. | %      |
|-------|-------|--------|
| 0 No  | 14    | 100.00 |
| Total | 14    | 100.00 |

**exg022\_s35: Estate Planning: Other Child[35]/s Spouse**

|       | Freq. | %      |
|-------|-------|--------|
| 0 No  | 14    | 100.00 |
| Total | 14    | 100.00 |

**exg023\_1\_: Estate Planning: Child[1]/s Spouse(%)**

| Mean  | SD    | Min   | Max    | Obs |
|-------|-------|-------|--------|-----|
| 56.13 | 42.30 | -1.00 | 100.00 | 10  |

**exg023\_2\_: Estate Planning: Child[2]/s Spouse(%)**

| Mean  | SD    | Min   | Max    | Obs |
|-------|-------|-------|--------|-----|
| 31.33 | 38.50 | -1.00 | 100.00 | 6   |

**exg023\_3\_: Estate Planning: Child[3]/s Spouse(%)**

| Mean  | SD    | Min   | Max   | Obs |
|-------|-------|-------|-------|-----|
| 25.57 | 21.55 | -1.00 | 50.00 | 4   |

**exg023\_4\_: Estate Planning: Child[4]/s Spouse(%)**

| Mean  | SD    | Min   | Max    | Obs |
|-------|-------|-------|--------|-----|
| 50.46 | 46.85 | -1.00 | 100.00 | 5   |

**exg023\_5\_: Estate Planning: Child[5]/s Spouse(%)**

| Mean  | SD | Min   | Max   | Obs |
|-------|----|-------|-------|-----|
| -1.00 | .  | -1.00 | -1.00 | 1   |

**exg026\_s1: Estate Planning: Child[1]'s Children**

|       | Freq. | %      |
|-------|-------|--------|
| 0 No  | 1     | 50.00  |
| 1 Yes | 1     | 50.00  |
| Total | 2     | 100.00 |

**exg026\_s2: Estate Planning: Child[2]'s Children**

|       | Freq. | %      |
|-------|-------|--------|
| Ø No  | 2     | 100.00 |
| Total | 2     | 100.00 |

**exg026\_s3:** Estate Planning: Child[3]'s Children

|       | Freq. | %      |
|-------|-------|--------|
| Ø No  | 2     | 100.00 |
| Total | 2     | 100.00 |

**exg026\_s4:** Estate Planning: Child[4]'s Children

|       | Freq. | %      |
|-------|-------|--------|
| Ø No  | 2     | 100.00 |
| Total | 2     | 100.00 |

**exg026\_s5:** Estate Planning: Child[5]'s Children

|       | Freq. | %      |
|-------|-------|--------|
| Ø No  | 2     | 100.00 |
| Total | 2     | 100.00 |

**exg026\_s6:** Estate Planning: Child[6]'s Children

|       | Freq. | %      |
|-------|-------|--------|
| Ø No  | 2     | 100.00 |
| Total | 2     | 100.00 |

**exg026\_s7:** Estate Planning: Child[7]'s Children

|       | Freq. | %      |
|-------|-------|--------|
| Ø No  | 2     | 100.00 |
| Total | 2     | 100.00 |

**exg026\_s8:** Estate Planning: Child[8]'s Children

|       | Freq. | %      |
|-------|-------|--------|
| Ø No  | 2     | 100.00 |
| Total | 2     | 100.00 |

**exg026\_s9:** Estate Planning: Child[9]'s Children

|       | Freq. | %      |
|-------|-------|--------|
| Ø No  | 2     | 100.00 |
| Total | 2     | 100.00 |

**exg026\_s10:** Estate Planning: Child[10]'s Children

|       | Freq. | %      |
|-------|-------|--------|
| 0 No  | 2     | 100.00 |
| Total | 2     | 100.00 |

**exg026\_s11:** Estate Planning: Child[11]'s Children

|       | Freq. | %      |
|-------|-------|--------|
| 0 No  | 2     | 100.00 |
| Total | 2     | 100.00 |

**exg026\_s12:** Estate Planning: Child[12]'s Children

|       | Freq. | %      |
|-------|-------|--------|
| 0 No  | 2     | 100.00 |
| Total | 2     | 100.00 |

**exg026\_s13:** Estate Planning: Child[13]'s Children

|       | Freq. | %      |
|-------|-------|--------|
| 0 No  | 2     | 100.00 |
| Total | 2     | 100.00 |

**exg026\_s14:** Estate Planning: Child[14]'s Children

|       | Freq. | %      |
|-------|-------|--------|
| 0 No  | 2     | 100.00 |
| Total | 2     | 100.00 |

**exg026\_s15:** Estate Planning: Child[15]'s Children

|       | Freq. | %      |
|-------|-------|--------|
| 0 No  | 2     | 100.00 |
| Total | 2     | 100.00 |

**exg026\_s16:** Estate Planning: Child[16]'s Children

|       | Freq. | %      |
|-------|-------|--------|
| 0 No  | 2     | 100.00 |
| Total | 2     | 100.00 |

**exg026\_s17:** Estate Planning: Child[17]'s Children

|       | Freq. | %      |
|-------|-------|--------|
| 0 No  | 2     | 100.00 |
| Total | 2     | 100.00 |



**exg026\_s18:** Estate Planning: Child[18]'s Children

|       | Freq. | %      |
|-------|-------|--------|
| 0 No  | 2     | 100.00 |
| Total | 2     | 100.00 |

**exg026\_s19:** Estate Planning: Child[19]'s Children

|       | Freq. | %      |
|-------|-------|--------|
| 0 No  | 2     | 100.00 |
| Total | 2     | 100.00 |

**exg026\_s20:** Estate Planning: Child[20]'s Children

|       | Freq. | %      |
|-------|-------|--------|
| 0 No  | 2     | 100.00 |
| Total | 2     | 100.00 |

**exg026\_s21:** Estate Planning: Child[21]'s Children

|       | Freq. | %      |
|-------|-------|--------|
| 0 No  | 2     | 100.00 |
| Total | 2     | 100.00 |

**exg026\_s22:** Estate Planning: Child[22]'s Children

|       | Freq. | %      |
|-------|-------|--------|
| 0 No  | 2     | 100.00 |
| Total | 2     | 100.00 |

**exg026\_s23:** Estate Planning: Child[23]'s Children

|       | Freq. | %      |
|-------|-------|--------|
| 0 No  | 2     | 100.00 |
| Total | 2     | 100.00 |

**exg026\_s24:** Estate Planning: Child[24]'s Children

|       | Freq. | %      |
|-------|-------|--------|
| 0 No  | 2     | 100.00 |
| Total | 2     | 100.00 |

**exg026\_s25:** Estate Planning: Child[25]'s Children

|       | Freq. | %      |
|-------|-------|--------|
| 0 No  | 2     | 100.00 |
| Total | 2     | 100.00 |

**exg026\_s26:** Estate Planning: Other Child[26]'s Children

|        | Freq. | %      |
|--------|-------|--------|
| 0 No   | 1     | 50.00  |
| 26 Yes | 1     | 50.00  |
| Total  | 2     | 100.00 |

**exg026\_s27:** Estate Planning: Other Child[27]'s Children

|       | Freq. | %      |
|-------|-------|--------|
| 0 No  | 2     | 100.00 |
| Total | 2     | 100.00 |

**exg026\_s28:** Estate Planning: Other Child[28]'s Children

|       | Freq. | %      |
|-------|-------|--------|
| 0 No  | 2     | 100.00 |
| Total | 2     | 100.00 |

**exg026\_s29:** Estate Planning: Other Child[29]'s Children

|       | Freq. | %      |
|-------|-------|--------|
| 0 No  | 2     | 100.00 |
| Total | 2     | 100.00 |

**exg026\_s30:** Estate Planning: Other Child[30]'s Children

|       | Freq. | %      |
|-------|-------|--------|
| 0 No  | 2     | 100.00 |
| Total | 2     | 100.00 |

**exg026\_s31:** Estate Planning: Other Child[31]'s Children

|       | Freq. | %      |
|-------|-------|--------|
| 0 No  | 2     | 100.00 |
| Total | 2     | 100.00 |

**exg026\_s32:** Estate Planning: Other Child[32]'s Children

|       | Freq. | %      |
|-------|-------|--------|
| 0 No  | 2     | 100.00 |
| Total | 2     | 100.00 |

**exg026\_s33:** Estate Planning: Other Child[33]'s Children

|      | Freq. | %      |
|------|-------|--------|
| 0 No | 2     | 100.00 |

|       |   |        |
|-------|---|--------|
| Total | 2 | 100.00 |
|-------|---|--------|

**exg026\_s34: Estate Planning: Other Child[34]'s Children**

|       | Freq. | %      |
|-------|-------|--------|
| 0 No  | 2     | 100.00 |
| Total | 2     | 100.00 |

**exg026\_s35: Estate Planning: Other Child[35]'s Children**

|       | Freq. | %      |
|-------|-------|--------|
| 0 No  | 2     | 100.00 |
| Total | 2     | 100.00 |

**exg027\_1\_: Estate Planning: Child[1]'s Children(%)**

| Mean  | SD | Min   | Max   | Obs |
|-------|----|-------|-------|-----|
| 20.00 | .  | 20.00 | 20.00 | 1   |

**exg027\_26\_: Estate Planning: Other Child[26]'s Children(%)**

| Mean  | SD | Min   | Max   | Obs |
|-------|----|-------|-------|-----|
| 50.00 | .  | 50.00 | 50.00 | 1   |

**exg028: Equal Share among Sibling for Sibling Share**

|                 |
|-----------------|
| No Observations |
|-----------------|

**exg029: Any Estate is Inherited**

|       | Freq. | %      |
|-------|-------|--------|
| 1 Yes | 95    | 12.50  |
| 2 No  | 665   | 87.50  |
| Total | 760   | 100.00 |

**exg029\_1: Total Value of Estate Inherited**

| Mean      | SD        | Min   | Max        | Obs |
|-----------|-----------|-------|------------|-----|
| 42,776.55 | 80,259.27 | -1.00 | 560,000.00 | 95  |

**exg030: Follow the Will**

|       | Freq. | %      |
|-------|-------|--------|
| 1 Yes | 2     | 66.67  |
| 2 No  | 1     | 33.33  |
| Total | 3     | 100.00 |

**exg031\_s1: Legacy Disposed without Housing: Spouse**

|       | Freq. | %      |
|-------|-------|--------|
| 0 No  | 68    | 73.12  |
| 1 Yes | 25    | 26.88  |
| Total | 93    | 100.00 |

**exg031\_s2: Legacy Disposed without Housing: Children/Sons-in-law/Daughters-in-law**

|       | Freq. | %      |
|-------|-------|--------|
| 0 No  | 38    | 40.86  |
| 2 Yes | 55    | 59.14  |
| Total | 93    | 100.00 |

**exg031\_s3: Legacy Disposed without Housing: Sibling**

|       | Freq. | %      |
|-------|-------|--------|
| 0 No  | 92    | 98.92  |
| 3 Yes | 1     | 1.08   |
| Total | 93    | 100.00 |

**exg031\_s4: Legacy Disposed without Housing: Other Relatives**

|       | Freq. | %      |
|-------|-------|--------|
| 0 No  | 92    | 98.92  |
| 4 Yes | 1     | 1.08   |
| Total | 93    | 100.00 |

**exg031\_s5: Legacy Disposed without Housing: Parents/Parents-in-law**

|       | Freq. | %      |
|-------|-------|--------|
| 0 No  | 93    | 100.00 |
| Total | 93    | 100.00 |

**exg031\_s6: Legacy Disposed without Housing: Grandchildren**

|       | Freq. | %      |
|-------|-------|--------|
| 0 No  | 91    | 97.85  |
| 6 Yes | 2     | 2.15   |
| Total | 93    | 100.00 |

**exg031\_s7: Legacy Disposed without Housing: Friends**

|       | Freq. | %      |
|-------|-------|--------|
| 0 No  | 93    | 100.00 |
| Total | 93    | 100.00 |

**exg031\_s8: Legacy Disposed without Housing: Charity**

|       | Freq. | %      |
|-------|-------|--------|
| 0 No  | 93    | 100.00 |
| Total | 93    | 100.00 |

**exg031\_s9: Legacy Disposed without Housing: Others**

|       | Freq. | %      |
|-------|-------|--------|
| 0 No  | 91    | 97.85  |
| 9 Yes | 2     | 2.15   |
| Total | 93    | 100.00 |

**exg031\_s10: Legacy Disposed without Housing: No Distribution**

|        | Freq. | %      |
|--------|-------|--------|
| 0 No   | 80    | 86.02  |
| 10 Yes | 13    | 13.98  |
| Total  | 93    | 100.00 |

**exg031\_1: Legacy Disposed without Housing: Spouse(%)**

| Mean  | SD    | Min   | Max    | Obs |
|-------|-------|-------|--------|-----|
| 69.80 | 45.45 | -1.00 | 100.00 | 25  |

**exg031\_3: Legacy Disposed without Housing: Sibling(%)**

| Mean  | SD | Min   | Max   | Obs |
|-------|----|-------|-------|-----|
| 25.00 | .  | 25.00 | 25.00 | 1   |

**exg031\_4: Legacy Disposed without Housing: Other Relatives(%)**

| Mean   | SD | Min    | Max    | Obs |
|--------|----|--------|--------|-----|
| 100.00 | .  | 100.00 | 100.00 | 1   |

**exg031\_5: Legacy Disposed without Housing: Parents/Parents-in-law(%)**

|                 |
|-----------------|
| No Observations |
|-----------------|

**exg031\_7: Legacy Disposed without Housing: Friends(%)**

|                 |
|-----------------|
| No Observations |
|-----------------|

**exg031\_8: Legacy Disposed without Housing: Charity(%)**

|                 |
|-----------------|
| No Observations |
|-----------------|

**exg031\_9: Legacy Disposed without Housing: Others(%)**

| Mean  | SD   | Min   | Max   | Obs |
|-------|------|-------|-------|-----|
| -1.00 | 0.00 | -1.00 | -1.00 | 2   |

**exg032\_s1: Legacy Disposed without Housing: Child[1]/'s Spouse**

|       | Freq. | %      |
|-------|-------|--------|
| 0 No  | 22    | 40.00  |
| 1 Yes | 33    | 60.00  |
| Total | 55    | 100.00 |

**exg032\_s2: Legacy Disposed without Housing: Child[2]/'s Spouse**

|       | Freq. | %      |
|-------|-------|--------|
| 0 No  | 32    | 58.18  |
| 2 Yes | 23    | 41.82  |
| Total | 55    | 100.00 |

**exg032\_s3: Legacy Disposed without Housing: Child[3]/'s Spouse**

|       | Freq. | %      |
|-------|-------|--------|
| 0 No  | 36    | 65.45  |
| 3 Yes | 19    | 34.55  |
| Total | 55    | 100.00 |

**exg032\_s4: Legacy Disposed without Housing: Child[4]/'s Spouse**

|       | Freq. | %      |
|-------|-------|--------|
| 0 No  | 40    | 72.73  |
| 4 Yes | 15    | 27.27  |
| Total | 55    | 100.00 |

**exg032\_s5: Legacy Disposed without Housing: Child[5]/'s Spouse**

|       | Freq. | %      |
|-------|-------|--------|
| 0 No  | 49    | 89.09  |
| 5 Yes | 6     | 10.91  |
| Total | 55    | 100.00 |

**exg032\_s6: Legacy Disposed without Housing: Child[6]/'s Spouse**

|       | Freq. | %      |
|-------|-------|--------|
| 0 No  | 53    | 96.36  |
| 6 Yes | 2     | 3.64   |
| Total | 55    | 100.00 |

**exg032\_s7: Legacy Disposed without Housing: Child[7]/'s Spouse**

|       | Freq. | %      |
|-------|-------|--------|
| 0 No  | 54    | 98.18  |
| 7 Yes | 1     | 1.82   |
| Total | 55    | 100.00 |

**exg032\_s8:** Legacy Disposed without Housing: Child[8]/'s Spouse

|       | Freq. | %      |
|-------|-------|--------|
| 0 No  | 54    | 98.18  |
| 8 Yes | 1     | 1.82   |
| Total | 55    | 100.00 |

**exg032\_s9:** Legacy Disposed without Housing: Child[9]/'s Spouse

|       | Freq. | %      |
|-------|-------|--------|
| 0 No  | 55    | 100.00 |
| Total | 55    | 100.00 |

**exg032\_s10:** Legacy Disposed without Housing: Child[10]/'s Spouse

|       | Freq. | %      |
|-------|-------|--------|
| 0 No  | 55    | 100.00 |
| Total | 55    | 100.00 |

**exg032\_s11:** Legacy Disposed without Housing: Child[11]/'s Spouse

|        | Freq. | %      |
|--------|-------|--------|
| 0 No   | 54    | 98.18  |
| 11 Yes | 1     | 1.82   |
| Total  | 55    | 100.00 |

**exg032\_s12:** Legacy Disposed without Housing: Child[12]/'s Spouse

|       | Freq. | %      |
|-------|-------|--------|
| 0 No  | 55    | 100.00 |
| Total | 55    | 100.00 |

**exg032\_s13:** Legacy Disposed without Housing: Child[13]/'s Spouse

|       | Freq. | %      |
|-------|-------|--------|
| 0 No  | 55    | 100.00 |
| Total | 55    | 100.00 |

**exg032\_s14:** Legacy Disposed without Housing: Child[14]/'s Spouse

|      | Freq. | %      |
|------|-------|--------|
| 0 No | 55    | 100.00 |

|       |    |        |
|-------|----|--------|
| Total | 55 | 100.00 |
|-------|----|--------|

**exg032\_s15: Legacy Disposed without Housing: Child[15]/'s Spouse**

|       | Freq. | %      |
|-------|-------|--------|
| 0 No  | 55    | 100.00 |
| Total | 55    | 100.00 |

**exg032\_s16: Legacy Disposed without Housing: Child[16]/'s Spouse**

|       | Freq. | %      |
|-------|-------|--------|
| 0 No  | 55    | 100.00 |
| Total | 55    | 100.00 |

**exg032\_s17: Legacy Disposed without Housing: Child[17]/'s Spouse**

|       | Freq. | %      |
|-------|-------|--------|
| 0 No  | 55    | 100.00 |
| Total | 55    | 100.00 |

**exg032\_s18: Legacy Disposed without Housing: Child[18]/'s Spouse**

|       | Freq. | %      |
|-------|-------|--------|
| 0 No  | 55    | 100.00 |
| Total | 55    | 100.00 |

**exg032\_s19: Legacy Disposed without Housing: Child[19]/'s Spouse**

|       | Freq. | %      |
|-------|-------|--------|
| 0 No  | 55    | 100.00 |
| Total | 55    | 100.00 |

**exg032\_s20: Legacy Disposed without Housing: Child[20]/'s Spouse**

|       | Freq. | %      |
|-------|-------|--------|
| 0 No  | 55    | 100.00 |
| Total | 55    | 100.00 |

**exg032\_s21: Legacy Disposed without Housing: Child[21]/'s Spouse**

|       | Freq. | %      |
|-------|-------|--------|
| 0 No  | 55    | 100.00 |
| Total | 55    | 100.00 |

**exg032\_s22: Legacy Disposed without Housing: Child[22]/'s Spouse**

|  | Freq. | % |
|--|-------|---|
|--|-------|---|



|       |    |        |
|-------|----|--------|
| 0 No  | 55 | 100.00 |
| Total | 55 | 100.00 |

**exg032\_s23: Legacy Disposed without Housing: Child[23]/'s Spouse**

|       | Freq. | %      |
|-------|-------|--------|
| 0 No  | 55    | 100.00 |
| Total | 55    | 100.00 |

**exg032\_s24: Legacy Disposed without Housing: Child[24]/'s Spouse**

|       | Freq. | %      |
|-------|-------|--------|
| 0 No  | 55    | 100.00 |
| Total | 55    | 100.00 |

**exg032\_s25: Legacy Disposed without Housing: Child[25]/'s Spouse**

|       | Freq. | %      |
|-------|-------|--------|
| 0 No  | 55    | 100.00 |
| Total | 55    | 100.00 |

**exg032\_s26: Legacy Disposed without Housing: Other Child[26]/'s Spouse**

|        | Freq. | %      |
|--------|-------|--------|
| 0 No   | 53    | 96.36  |
| 26 Yes | 2     | 3.64   |
| Total  | 55    | 100.00 |

**exg032\_s27: Legacy Disposed without Housing: Other Child[27]/'s Spouse**

|        | Freq. | %      |
|--------|-------|--------|
| 0 No   | 54    | 98.18  |
| 27 Yes | 1     | 1.82   |
| Total  | 55    | 100.00 |

**exg032\_s28: Legacy Disposed without Housing: Other Child[28]/'s Spouse**

|        | Freq. | %      |
|--------|-------|--------|
| 0 No   | 54    | 98.18  |
| 28 Yes | 1     | 1.82   |
| Total  | 55    | 100.00 |

**exg032\_s29: Legacy Disposed without Housing: Other Child[29]/'s Spouse**

|        | Freq. | %      |
|--------|-------|--------|
| 0 No   | 54    | 98.18  |
| 29 Yes | 1     | 1.82   |
| Total  | 55    | 100.00 |

**exg032\_s30:** Legacy Disposed without Housing: Other Child[30]/'s Spouse

|        | Freq. | %      |
|--------|-------|--------|
| 0 No   | 54    | 98.18  |
| 30 Yes | 1     | 1.82   |
| Total  | 55    | 100.00 |

**exg032\_s31:** Legacy Disposed without Housing: Other Child[31]/'s Spouse

|       | Freq. | %      |
|-------|-------|--------|
| 0 No  | 55    | 100.00 |
| Total | 55    | 100.00 |

**exg032\_s32:** Legacy Disposed without Housing: Other Child[32]/'s Spouse

|       | Freq. | %      |
|-------|-------|--------|
| 0 No  | 55    | 100.00 |
| Total | 55    | 100.00 |

**exg032\_s33:** Legacy Disposed without Housing: Other Child[33]/'s Spouse

|       | Freq. | %      |
|-------|-------|--------|
| 0 No  | 55    | 100.00 |
| Total | 55    | 100.00 |

**exg032\_s34:** Legacy Disposed without Housing: Other Child[34]/'s Spouse

|       | Freq. | %      |
|-------|-------|--------|
| 0 No  | 55    | 100.00 |
| Total | 55    | 100.00 |

**exg032\_s35:** Legacy Disposed without Housing: Other Child[35]/'s Spouse

|       | Freq. | %      |
|-------|-------|--------|
| 0 No  | 55    | 100.00 |
| Total | 55    | 100.00 |

**exg033\_1\_:** Legacy Disposed without Housing: Child[1]/'s Spouse(%)

| Mean  | SD    | Min   | Max    | Obs |
|-------|-------|-------|--------|-----|
| 63.60 | 41.38 | -1.00 | 100.00 | 33  |

**exg033\_2\_:** Legacy Disposed without Housing: Child[2]/'s Spouse(%)

| Mean  | SD    | Min   | Max    | Obs |
|-------|-------|-------|--------|-----|
| 35.17 | 31.56 | -1.00 | 100.00 | 23  |

**exg033\_3\_:** Legacy Disposed without Housing: Child[3]/'s Spouse(%)

| Mean  | SD    | Min   | Max    | Obs |
|-------|-------|-------|--------|-----|
| 42.15 | 37.93 | -1.00 | 100.00 | 19  |

**exg033\_4\_:** Legacy Disposed without Housing: Child[4]/'s Spouse(%)

| Mean  | SD    | Min  | Max    | Obs |
|-------|-------|------|--------|-----|
| 40.19 | 30.38 | 3.60 | 100.00 | 15  |

**exg033\_5\_:** Legacy Disposed without Housing: Child[5]/'s Spouse(%)

| Mean  | SD    | Min  | Max   | Obs |
|-------|-------|------|-------|-----|
| 20.47 | 15.71 | 3.60 | 50.00 | 6   |

**exg033\_6\_:** Legacy Disposed without Housing: Child[6]/'s Spouse(%)

| Mean  | SD   | Min   | Max   | Obs |
|-------|------|-------|-------|-----|
| 14.60 | 2.97 | 12.50 | 16.70 | 2   |

**exg033\_7\_:** Legacy Disposed without Housing: Child[7]/'s Spouse(%)

| Mean  | SD | Min   | Max   | Obs |
|-------|----|-------|-------|-----|
| 12.50 | .  | 12.50 | 12.50 | 1   |

**exg033\_8\_:** Legacy Disposed without Housing: Child[8]/'s Spouse(%)

| Mean  | SD | Min   | Max   | Obs |
|-------|----|-------|-------|-----|
| 12.50 | .  | 12.50 | 12.50 | 1   |

**exg033\_9\_:** Legacy Disposed without Housing: Child[9]/'s Spouse(%)

|                 |  |  |  |  |
|-----------------|--|--|--|--|
| No Observations |  |  |  |  |
|-----------------|--|--|--|--|

**exg033\_10\_:** Legacy Disposed without Housing: Child[10]/'s Spouse(%)

|                 |  |  |  |  |
|-----------------|--|--|--|--|
| No Observations |  |  |  |  |
|-----------------|--|--|--|--|

**exg033\_11\_:** Legacy Disposed without Housing: Child[11]/'s Spouse(%)

| Mean   | SD | Min    | Max    | Obs |
|--------|----|--------|--------|-----|
| 100.00 | .  | 100.00 | 100.00 | 1   |

**exg033\_12\_:** Legacy Disposed without Housing: Child[12]/'s Spouse(%)

---

No Observations

---

**exg033\_26\_:** Legacy Disposed without Housing: Other Child[26]/'s Spouse(%)

| Mean  | SD    | Min   | Max    | Obs |
|-------|-------|-------|--------|-----|
| 62.50 | 53.03 | 25.00 | 100.00 | 2   |

**exg033\_27\_:** Legacy Disposed without Housing: Other Child[27]/'s Spouse(%)

| Mean  | SD | Min   | Max   | Obs |
|-------|----|-------|-------|-----|
| 25.00 | .  | 25.00 | 25.00 | 1   |

**exg033\_28\_:** Legacy Disposed without Housing: Other Child[28]/'s Spouse(%)

| Mean  | SD | Min   | Max   | Obs |
|-------|----|-------|-------|-----|
| 25.00 | .  | 25.00 | 25.00 | 1   |

**exg033\_29\_:** Legacy Disposed without Housing: Other Child[29]/'s Spouse(%)

| Mean  | SD | Min   | Max   | Obs |
|-------|----|-------|-------|-----|
| 25.00 | .  | 25.00 | 25.00 | 1   |

**exg033\_30\_:** Legacy Disposed without Housing: Other Child[30]/'s Spouse(%)

| Mean  | SD | Min   | Max   | Obs |
|-------|----|-------|-------|-----|
| 25.00 | .  | 25.00 | 25.00 | 1   |

**exg036\_s1:** Legacy Disposed without Housing: Child[1]'s Children

|       | Freq. | %      |
|-------|-------|--------|
| 0 No  | 1     | 50.00  |
| 1 Yes | 1     | 50.00  |
| Total | 2     | 100.00 |

**exg036\_s2:** Legacy Disposed without Housing: Child[2]'s Children

|       | Freq. | %      |
|-------|-------|--------|
| 0 No  | 1     | 50.00  |
| 2 Yes | 1     | 50.00  |
| Total | 2     | 100.00 |

**exg036\_s3:** Legacy Disposed without Housing: Child[3]'s Children

|       | Freq. | %     |
|-------|-------|-------|
| 0 No  | 1     | 50.00 |
| 3 Yes | 1     | 50.00 |

|       |   |        |
|-------|---|--------|
| Total | 2 | 100.00 |
|-------|---|--------|

**exg036\_s4:** Legacy Disposed without Housing: Child[4]'s Children

|       | Freq. | %      |
|-------|-------|--------|
| 0 No  | 1     | 50.00  |
| 4 Yes | 1     | 50.00  |
| Total | 2     | 100.00 |

**exg036\_s5:** Legacy Disposed without Housing: Child[5]'s Children

|       | Freq. | %      |
|-------|-------|--------|
| 0 No  | 1     | 50.00  |
| 5 Yes | 1     | 50.00  |
| Total | 2     | 100.00 |

**exg036\_s6:** Legacy Disposed without Housing: Child[6]'s Children

|       | Freq. | %      |
|-------|-------|--------|
| 0 No  | 2     | 100.00 |
| Total | 2     | 100.00 |

**exg036\_s7:** Legacy Disposed without Housing: Child[7]'s Children

|       | Freq. | %      |
|-------|-------|--------|
| 0 No  | 2     | 100.00 |
| Total | 2     | 100.00 |

**exg036\_s8:** Legacy Disposed without Housing: Child[8]'s Children

|       | Freq. | %      |
|-------|-------|--------|
| 0 No  | 2     | 100.00 |
| Total | 2     | 100.00 |

**exg036\_s9:** Legacy Disposed without Housing: Child[9]'s Children

|       | Freq. | %      |
|-------|-------|--------|
| 0 No  | 2     | 100.00 |
| Total | 2     | 100.00 |

**exg036\_s10:** Legacy Disposed without Housing: Child[10]'s Children

|       | Freq. | %      |
|-------|-------|--------|
| 0 No  | 2     | 100.00 |
| Total | 2     | 100.00 |

**exg036\_s11:** Legacy Disposed without Housing: Child[11]'s Children

|       | Freq. | %      |
|-------|-------|--------|
| 0 No  | 2     | 100.00 |
| Total | 2     | 100.00 |

**exg036\_s12:** Legacy Disposed without Housing: Child[12]'s Children

|       | Freq. | %      |
|-------|-------|--------|
| 0 No  | 2     | 100.00 |
| Total | 2     | 100.00 |

**exg036\_s13:** Legacy Disposed without Housing: Child[13]'s Children

|       | Freq. | %      |
|-------|-------|--------|
| 0 No  | 2     | 100.00 |
| Total | 2     | 100.00 |

**exg036\_s14:** Legacy Disposed without Housing: Child[14]'s Children

|       | Freq. | %      |
|-------|-------|--------|
| 0 No  | 2     | 100.00 |
| Total | 2     | 100.00 |

**exg036\_s15:** Legacy Disposed without Housing: Child[15]'s Children

|       | Freq. | %      |
|-------|-------|--------|
| 0 No  | 2     | 100.00 |
| Total | 2     | 100.00 |

**exg036\_s16:** Legacy Disposed without Housing: Child[16]'s Children

|       | Freq. | %      |
|-------|-------|--------|
| 0 No  | 2     | 100.00 |
| Total | 2     | 100.00 |

**exg036\_s17:** Legacy Disposed without Housing: Child[17]'s Children

|       | Freq. | %      |
|-------|-------|--------|
| 0 No  | 2     | 100.00 |
| Total | 2     | 100.00 |

**exg036\_s18:** Legacy Disposed without Housing: Child[18]'s Children

|       | Freq. | %      |
|-------|-------|--------|
| 0 No  | 2     | 100.00 |
| Total | 2     | 100.00 |

**exg036\_s19:** Legacy Disposed without Housing: Child[19]'s Children

|       | Freq. | %      |
|-------|-------|--------|
| 0 No  | 2     | 100.00 |
| Total | 2     | 100.00 |

**exg036\_s20:** Legacy Disposed without Housing: Child[20]'s Children

|       | Freq. | %      |
|-------|-------|--------|
| 0 No  | 2     | 100.00 |
| Total | 2     | 100.00 |

**exg036\_s21:** Legacy Disposed without Housing: Child[21]'s Children

|       | Freq. | %      |
|-------|-------|--------|
| 0 No  | 2     | 100.00 |
| Total | 2     | 100.00 |

**exg036\_s22:** Legacy Disposed without Housing: Child[22]'s Children

|       | Freq. | %      |
|-------|-------|--------|
| 0 No  | 2     | 100.00 |
| Total | 2     | 100.00 |

**exg036\_s23:** Legacy Disposed without Housing: Child[23]'s Children

|       | Freq. | %      |
|-------|-------|--------|
| 0 No  | 2     | 100.00 |
| Total | 2     | 100.00 |

**exg036\_s24:** Legacy Disposed without Housing: Child[24]'s Children

|       | Freq. | %      |
|-------|-------|--------|
| 0 No  | 2     | 100.00 |
| Total | 2     | 100.00 |

**exg036\_s25:** Legacy Disposed without Housing: Child[25]'s Children

|       | Freq. | %      |
|-------|-------|--------|
| 0 No  | 2     | 100.00 |
| Total | 2     | 100.00 |

**exg036\_s26:** Legacy Disposed without Housing: Other Child[26]'s Children

|        | Freq. | %     |
|--------|-------|-------|
| 0 No   | 1     | 50.00 |
| 26 Yes | 1     | 50.00 |

|       |   |        |
|-------|---|--------|
| Total | 2 | 100.00 |
|-------|---|--------|

**exg036\_s27: Legacy Disposed without Housing: Other Child[27]'s Children**

|       | Freq. | %      |
|-------|-------|--------|
| 0 No  | 2     | 100.00 |
| Total | 2     | 100.00 |

**exg036\_s28: Legacy Disposed without Housing: Other Child[28]'s Children**

|       | Freq. | %      |
|-------|-------|--------|
| 0 No  | 2     | 100.00 |
| Total | 2     | 100.00 |

**exg036\_s29: Legacy Disposed without Housing: Other Child[29]'s Children**

|       | Freq. | %      |
|-------|-------|--------|
| 0 No  | 2     | 100.00 |
| Total | 2     | 100.00 |

**exg036\_s30: Legacy Disposed without Housing: Other Child[30]'s Children**

|       | Freq. | %      |
|-------|-------|--------|
| 0 No  | 2     | 100.00 |
| Total | 2     | 100.00 |

**exg036\_s31: Legacy Disposed without Housing: Other Child[31]'s Children**

|       | Freq. | %      |
|-------|-------|--------|
| 0 No  | 2     | 100.00 |
| Total | 2     | 100.00 |

**exg036\_s32: Legacy Disposed without Housing: Other Child[32]'s Children**

|       | Freq. | %      |
|-------|-------|--------|
| 0 No  | 2     | 100.00 |
| Total | 2     | 100.00 |

**exg036\_s33: Legacy Disposed without Housing: Other Child[33]'s Children**

|       | Freq. | %      |
|-------|-------|--------|
| 0 No  | 2     | 100.00 |
| Total | 2     | 100.00 |

**exg036\_s34: Legacy Disposed without Housing: Other Child[34]'s Children**

|  | Freq. | % |
|--|-------|---|
|--|-------|---|



|       |   |        |
|-------|---|--------|
| 0 No  | 2 | 100.00 |
| Total | 2 | 100.00 |

**exg036\_s35:** Legacy Disposed without Housing: Other Child[35]'s Children

|       | Freq. | %      |
|-------|-------|--------|
| 0 No  | 2     | 100.00 |
| Total | 2     | 100.00 |

**exg037\_1\_:** Legacy Disposed without Housing: Child[1]'s Children(%)

| Mean | SD | Min  | Max  | Obs |
|------|----|------|------|-----|
| 3.60 | .  | 3.60 | 3.60 | 1   |

**exg037\_2\_:** Legacy Disposed without Housing: Child[2]'s Children(%)

| Mean | SD | Min  | Max  | Obs |
|------|----|------|------|-----|
| 1.80 | .  | 1.80 | 1.80 | 1   |

**exg037\_3\_:** Legacy Disposed without Housing: Child[3]'s Children(%)

| Mean | SD | Min  | Max  | Obs |
|------|----|------|------|-----|
| 3.60 | .  | 3.60 | 3.60 | 1   |

**exg037\_4\_:** Legacy Disposed without Housing: Child[4]'s Children(%)

| Mean | SD | Min  | Max  | Obs |
|------|----|------|------|-----|
| 3.60 | .  | 3.60 | 3.60 | 1   |

**exg037\_5\_:** Legacy Disposed without Housing: Child[5]'s Children(%)

| Mean | SD | Min  | Max  | Obs |
|------|----|------|------|-----|
| 3.60 | .  | 3.60 | 3.60 | 1   |

**exg037\_26\_:** Legacy Disposed without Housing: Other Child[26]'s Children(%)

| Mean  | SD | Min   | Max   | Obs |
|-------|----|-------|-------|-----|
| 25.00 | .  | 25.00 | 25.00 | 1   |

**k01:** Kind of Burial

|                         | Freq. | %      |
|-------------------------|-------|--------|
| 1 Cremation             | 398   | 52.37  |
| 2 Ground Burial         | 355   | 46.71  |
| 3 Sky Burial            | 4     | 0.53   |
| 5 Other, Please Specify | 3     | 0.39   |
| Total                   | 760   | 100.00 |

**k02: Where Was He/She Buried**

|                              | Freq. | %      |
|------------------------------|-------|--------|
| 1 Contracted Land            | 321   | 42.63  |
| 2 Collective Burial Ground   | 153   | 20.32  |
| 3 Commercial Burial Ground   | 74    | 9.83   |
| 4 Waster Land                | 69    | 9.16   |
| 5 Ashes Kept In Funeral Home | 43    | 5.71   |
| 6 Other, Please Specify      | 93    | 12.35  |
| Total                        | 753   | 100.00 |

**k03: How Much Does the Burial Ground Cost?**

|                 | Freq. | %      |
|-----------------|-------|--------|
| 1 Yuan Total    | 221   | 97.36  |
| 2 Yuan Per Year | 6     | 2.64   |
| Total           | 227   | 100.00 |

**k03\_1: K03\_1**

| Mean      | SD        | Min  | Max        | Obs |
|-----------|-----------|------|------------|-----|
| 10,947.17 | 18,783.77 | 0.00 | 150,000.00 | 205 |

**k03\_2: K03\_2**

| Mean  | SD    | Min  | Max    | Obs |
|-------|-------|------|--------|-----|
| 16.67 | 40.82 | 0.00 | 100.00 | 6   |

**k04: In Which Year Was the Burial Ground Purchased?**

| Mean     | SD   | Min      | Max      | Obs |
|----------|------|----------|----------|-----|
| 2,016.52 | 6.99 | 1,956.00 | 2,020.00 | 227 |

**k06\_s1: Spouse**

| Mean | SD   | Min  | Max  | Obs |
|------|------|------|------|-----|
| 0.18 | 0.38 | 0.00 | 1.00 | 227 |

**k06\_s2: Child**

| Mean | SD   | Min  | Max  | Obs |
|------|------|------|------|-----|
| 0.81 | 0.98 | 0.00 | 2.00 | 227 |

**k06\_s3: Child**

| Mean | SD   | Min  | Max  | Obs |
|------|------|------|------|-----|
| 0.81 | 1.33 | 0.00 | 3.00 | 227 |

**k06\_s4: Child**

| Mean | SD   | Min  | Max  | Obs |
|------|------|------|------|-----|
| 0.76 | 1.57 | 0.00 | 4.00 | 227 |

**k06\_s5: Child**

| Mean | SD   | Min  | Max  | Obs |
|------|------|------|------|-----|
| 0.64 | 1.67 | 0.00 | 5.00 | 227 |

**k06\_s6: Child**

| Mean | SD   | Min  | Max  | Obs |
|------|------|------|------|-----|
| 0.32 | 1.35 | 0.00 | 6.00 | 227 |

**k06\_s7: Child**

| Mean | SD   | Min  | Max  | Obs |
|------|------|------|------|-----|
| 0.31 | 1.44 | 0.00 | 7.00 | 227 |

**k06\_s8: Child**

| Mean | SD   | Min  | Max  | Obs |
|------|------|------|------|-----|
| 0.11 | 0.92 | 0.00 | 8.00 | 227 |

**k06\_s9: Child**

| Mean | SD   | Min  | Max  | Obs |
|------|------|------|------|-----|
| 0.08 | 0.84 | 0.00 | 9.00 | 227 |

**k06\_s10: Child**

| Mean | SD   | Min  | Max   | Obs |
|------|------|------|-------|-----|
| 0.09 | 0.94 | 0.00 | 10.00 | 227 |

**k06\_s11: Child**

| Mean | SD   | Min  | Max   | Obs |
|------|------|------|-------|-----|
| 0.05 | 0.73 | 0.00 | 11.00 | 227 |

**k06\_s12: Child**

| Mean | SD   | Min  | Max  | Obs |
|------|------|------|------|-----|
| 0.00 | 0.00 | 0.00 | 0.00 | 227 |

**k06\_s13: Child**

| Mean | SD   | Min  | Max  | Obs |
|------|------|------|------|-----|
| 0.00 | 0.00 | 0.00 | 0.00 | 227 |

**k06\_s14: Child**

| Mean | SD   | Min  | Max  | Obs |
|------|------|------|------|-----|
| 0.00 | 0.00 | 0.00 | 0.00 | 227 |

**k06\_s15: Child**

| Mean | SD   | Min  | Max  | Obs |
|------|------|------|------|-----|
| 0.00 | 0.00 | 0.00 | 0.00 | 227 |

**k06\_s16: Child**

| Mean | SD   | Min  | Max  | Obs |
|------|------|------|------|-----|
| 0.00 | 0.00 | 0.00 | 0.00 | 227 |

**k06\_s17: Child**

| Mean | SD   | Min  | Max  | Obs |
|------|------|------|------|-----|
| 0.00 | 0.00 | 0.00 | 0.00 | 227 |

**k06\_s18: Child**

| Mean | SD   | Min  | Max  | Obs |
|------|------|------|------|-----|
| 0.00 | 0.00 | 0.00 | 0.00 | 227 |

**k06\_s19: Child**

| Mean | SD   | Min  | Max  | Obs |
|------|------|------|------|-----|
| 0.00 | 0.00 | 0.00 | 0.00 | 227 |

**k06\_s20: Child**

| Mean | SD   | Min  | Max  | Obs |
|------|------|------|------|-----|
| 0.00 | 0.00 | 0.00 | 0.00 | 227 |

**k06\_s21: Child**

| Mean | SD   | Min  | Max  | Obs |
|------|------|------|------|-----|
| 0.00 | 0.00 | 0.00 | 0.00 | 227 |

**k06\_s22: Child**

| Mean | SD   | Min  | Max  | Obs |
|------|------|------|------|-----|
| 0.00 | 0.00 | 0.00 | 0.00 | 227 |

**k06\_s23: Child**

| Mean | SD   | Min  | Max  | Obs |
|------|------|------|------|-----|
| 0.00 | 0.00 | 0.00 | 0.00 | 227 |

**k06\_s24: Child**

| Mean | SD   | Min  | Max  | Obs |
|------|------|------|------|-----|
| 0.00 | 0.00 | 0.00 | 0.00 | 227 |

**k06\_s25: Child**

| Mean | SD   | Min  | Max  | Obs |
|------|------|------|------|-----|
| 0.00 | 0.00 | 0.00 | 0.00 | 227 |

**k06\_s26: Child**

| Mean | SD   | Min  | Max  | Obs |
|------|------|------|------|-----|
| 0.00 | 0.00 | 0.00 | 0.00 | 227 |

**k06\_s27: Child's Spouse**

| Mean | SD   | Min  | Max   | Obs |
|------|------|------|-------|-----|
| 2.85 | 8.32 | 0.00 | 27.00 | 227 |

**k06\_s28: Child's Spouse**

| Mean | SD   | Min  | Max   | Obs |
|------|------|------|-------|-----|
| 2.34 | 7.77 | 0.00 | 28.00 | 227 |

**k06\_s29: Child's Spouse**

| Mean | SD   | Min  | Max   | Obs |
|------|------|------|-------|-----|
| 2.04 | 7.44 | 0.00 | 29.00 | 227 |

**k06\_s30: Child's Spouse**

| Mean | SD   | Min  | Max   | Obs |
|------|------|------|-------|-----|
| 1.32 | 6.17 | 0.00 | 30.00 | 227 |

**k06\_s31: Child's Spouse**

| Mean | SD   | Min  | Max   | Obs |
|------|------|------|-------|-----|
| 0.41 | 3.55 | 0.00 | 31.00 | 227 |

**k06\_s32: Child's Spouse**

| Mean | SD   | Min  | Max   | Obs |
|------|------|------|-------|-----|
| 0.56 | 4.22 | 0.00 | 32.00 | 227 |

**k06\_s33: Child's Spouse**

| Mean | SD   | Min  | Max   | Obs |
|------|------|------|-------|-----|
| 0.29 | 3.09 | 0.00 | 33.00 | 227 |

**k06\_s34: Child's Spouse**

| Mean | SD   | Min  | Max   | Obs |
|------|------|------|-------|-----|
| 0.30 | 3.18 | 0.00 | 34.00 | 227 |

**k06\_s35: Child's Spouse**

| Mean | SD   | Min  | Max   | Obs |
|------|------|------|-------|-----|
| 0.31 | 3.28 | 0.00 | 35.00 | 227 |

**k06\_s36: Child's Spouse**

| Mean | SD   | Min  | Max   | Obs |
|------|------|------|-------|-----|
| 0.16 | 2.39 | 0.00 | 36.00 | 227 |

**k06\_s37: Child's Spouse**

| Mean | SD   | Min  | Max  | Obs |
|------|------|------|------|-----|
| 0.00 | 0.00 | 0.00 | 0.00 | 227 |

**k06\_s38: Child's Spouse**

| Mean | SD   | Min  | Max  | Obs |
|------|------|------|------|-----|
| 0.00 | 0.00 | 0.00 | 0.00 | 227 |

**k06\_s39: Child's Spouse**

| Mean | SD   | Min  | Max  | Obs |
|------|------|------|------|-----|
| 0.00 | 0.00 | 0.00 | 0.00 | 227 |

**k06\_s40: Child's Spouse**

| Mean | SD   | Min  | Max  | Obs |
|------|------|------|------|-----|
| 0.00 | 0.00 | 0.00 | 0.00 | 227 |

**k06\_s41: Child's Spouse**

| Mean | SD   | Min  | Max  | Obs |
|------|------|------|------|-----|
| 0.00 | 0.00 | 0.00 | 0.00 | 227 |

**k06\_s42: Child's Spouse**

| Mean | SD   | Min  | Max  | Obs |
|------|------|------|------|-----|
| 0.00 | 0.00 | 0.00 | 0.00 | 227 |

**k06\_s43: Child's Spouse**

| Mean | SD   | Min  | Max  | Obs |
|------|------|------|------|-----|
| 0.00 | 0.00 | 0.00 | 0.00 | 227 |

**k06\_s44: Child's Spouse**

| Mean | SD   | Min  | Max  | Obs |
|------|------|------|------|-----|
| 0.00 | 0.00 | 0.00 | 0.00 | 227 |

**k06\_s45: Child's Spouse**

| Mean | SD   | Min  | Max  | Obs |
|------|------|------|------|-----|
| 0.00 | 0.00 | 0.00 | 0.00 | 227 |

**k06\_s46: Child's Spouse**

| Mean | SD   | Min  | Max  | Obs |
|------|------|------|------|-----|
| 0.00 | 0.00 | 0.00 | 0.00 | 227 |

**k06\_s47: Child's Spouse**

| Mean | SD   | Min  | Max  | Obs |
|------|------|------|------|-----|
| 0.00 | 0.00 | 0.00 | 0.00 | 227 |

**k06\_s48: Child's Spouse**

| Mean | SD   | Min  | Max  | Obs |
|------|------|------|------|-----|
| 0.00 | 0.00 | 0.00 | 0.00 | 227 |

**k06\_s49: Child's Spouse**

| Mean | SD   | Min  | Max  | Obs |
|------|------|------|------|-----|
| 0.00 | 0.00 | 0.00 | 0.00 | 227 |

**k06\_s50: Child's Spouse**

| Mean | SD   | Min  | Max  | Obs |
|------|------|------|------|-----|
| 0.00 | 0.00 | 0.00 | 0.00 | 227 |

**k06\_s51: Child's Spouse**

| Mean | SD   | Min  | Max  | Obs |
|------|------|------|------|-----|
| 0.00 | 0.00 | 0.00 | 0.00 | 227 |

**k06\_s52: Grandson**

| Mean | SD   | Min  | Max   | Obs |
|------|------|------|-------|-----|
| 1.37 | 8.36 | 0.00 | 52.00 | 227 |

**k07: Which Child Was the Parent of the Grandchild?**

| Mean | SD   | Min  | Max  | Obs |
|------|------|------|------|-----|
| 2.00 | 2.00 | 1.00 | 6.00 | 6   |

**k09\_min: K09\_min**

| A String Variable |  |  |  |    |
|-------------------|--|--|--|----|
| Obs:              |  |  |  | 89 |

**k09\_max: K09\_max**

| A String Variable |  |  |  |    |
|-------------------|--|--|--|----|
| Obs:              |  |  |  | 89 |

**k09: How Much Did the Whole Funeral Cost**

| Mean      | SD        | Min  | Max        | Obs |
|-----------|-----------|------|------------|-----|
| 27,897.43 | 29,072.82 | 0.00 | 350,000.00 | 671 |

**k10\_s1: Spouse**

| Mean | SD   | Min  | Max  | Obs |
|------|------|------|------|-----|
| 0.18 | 0.38 | 0.00 | 1.00 | 760 |

**k10\_s2: Child**



| Mean | SD   | Min  | Max  | Obs |
|------|------|------|------|-----|
| 1.19 | 0.98 | 0.00 | 2.00 | 760 |

**k10\_s3: Child**

| Mean | SD   | Min  | Max  | Obs |
|------|------|------|------|-----|
| 1.41 | 1.50 | 0.00 | 3.00 | 760 |

**k10\_s4: Child**

| Mean | SD   | Min  | Max  | Obs |
|------|------|------|------|-----|
| 1.29 | 1.87 | 0.00 | 4.00 | 760 |

**k10\_s5: Child**

| Mean | SD   | Min  | Max  | Obs |
|------|------|------|------|-----|
| 0.99 | 2.00 | 0.00 | 5.00 | 760 |

**k10\_s6: Child**

| Mean | SD   | Min  | Max  | Obs |
|------|------|------|------|-----|
| 0.67 | 1.89 | 0.00 | 6.00 | 760 |

**k10\_s7: Child**

| Mean | SD   | Min  | Max  | Obs |
|------|------|------|------|-----|
| 0.37 | 1.56 | 0.00 | 7.00 | 760 |

**k10\_s8: Child**

| Mean | SD   | Min  | Max  | Obs |
|------|------|------|------|-----|
| 0.24 | 1.37 | 0.00 | 8.00 | 760 |

**k10\_s9: Child**

| Mean | SD   | Min  | Max  | Obs |
|------|------|------|------|-----|
| 0.09 | 0.92 | 0.00 | 9.00 | 760 |

**k10\_s10: Child**

| Mean | SD   | Min  | Max   | Obs |
|------|------|------|-------|-----|
| 0.08 | 0.89 | 0.00 | 10.00 | 760 |

**k10\_s11: Child**

| Mean | SD   | Min  | Max   | Obs |
|------|------|------|-------|-----|
| 0.06 | 0.80 | 0.00 | 11.00 | 760 |

**k10\_s12: Child**

| Mean | SD   | Min  | Max   | Obs |
|------|------|------|-------|-----|
| 0.03 | 0.62 | 0.00 | 12.00 | 760 |

**k10\_s13: Child**

| Mean | SD   | Min  | Max  | Obs |
|------|------|------|------|-----|
| 0.00 | 0.00 | 0.00 | 0.00 | 760 |

**k10\_s14: Child**

| Mean | SD   | Min  | Max  | Obs |
|------|------|------|------|-----|
| 0.00 | 0.00 | 0.00 | 0.00 | 760 |

**k10\_s15: Child**

| Mean | SD   | Min  | Max  | Obs |
|------|------|------|------|-----|
| 0.00 | 0.00 | 0.00 | 0.00 | 760 |

**k10\_s16: Child**

| Mean | SD   | Min  | Max  | Obs |
|------|------|------|------|-----|
| 0.00 | 0.00 | 0.00 | 0.00 | 760 |

**k10\_s17: Child**

| Mean | SD   | Min  | Max  | Obs |
|------|------|------|------|-----|
| 0.00 | 0.00 | 0.00 | 0.00 | 760 |

**k10\_s18: Child**

| Mean | SD   | Min  | Max  | Obs |
|------|------|------|------|-----|
| 0.00 | 0.00 | 0.00 | 0.00 | 760 |

**k10\_s19: Child**

| Mean | SD   | Min  | Max  | Obs |
|------|------|------|------|-----|
| 0.00 | 0.00 | 0.00 | 0.00 | 760 |

**k10\_s20: Child**

| Mean | SD   | Min  | Max  | Obs |
|------|------|------|------|-----|
| 0.00 | 0.00 | 0.00 | 0.00 | 760 |

**k10\_s21: Child**

| Mean | SD   | Min  | Max  | Obs |
|------|------|------|------|-----|
| 0.00 | 0.00 | 0.00 | 0.00 | 760 |

**k10\_s22: Child**

| Mean | SD   | Min  | Max  | Obs |
|------|------|------|------|-----|
| 0.00 | 0.00 | 0.00 | 0.00 | 760 |

**k10\_s23: Child**

| Mean | SD   | Min  | Max  | Obs |
|------|------|------|------|-----|
| 0.00 | 0.00 | 0.00 | 0.00 | 760 |

**k10\_s24: Child**

| Mean | SD   | Min  | Max  | Obs |
|------|------|------|------|-----|
| 0.00 | 0.00 | 0.00 | 0.00 | 760 |

**k10\_s25: Child**

| Mean | SD   | Min  | Max  | Obs |
|------|------|------|------|-----|
| 0.00 | 0.00 | 0.00 | 0.00 | 760 |

**k10\_s26: Child**

| Mean | SD   | Min  | Max  | Obs |
|------|------|------|------|-----|
| 0.00 | 0.00 | 0.00 | 0.00 | 760 |

**k10\_s27: Child's Spouse**

| Mean | SD    | Min  | Max   | Obs |
|------|-------|------|-------|-----|
| 5.40 | 10.81 | 0.00 | 27.00 | 760 |

**k10\_s28: Child's Spouse**

| Mean | SD    | Min  | Max   | Obs |
|------|-------|------|-------|-----|
| 4.46 | 10.25 | 0.00 | 28.00 | 760 |

**k10\_s29: Child's Spouse**

| Mean | SD   | Min  | Max   | Obs |
|------|------|------|-------|-----|
| 3.59 | 9.55 | 0.00 | 29.00 | 760 |

**k10\_s30: Child's Spouse**

| Mean | SD   | Min  | Max   | Obs |
|------|------|------|-------|-----|
| 2.25 | 7.91 | 0.00 | 30.00 | 760 |

**k10\_s31: Child's Spouse**

| Mean | SD   | Min  | Max   | Obs |
|------|------|------|-------|-----|
| 1.55 | 6.76 | 0.00 | 31.00 | 760 |

**k10\_s32: Child's Spouse**

| Mean | SD   | Min  | Max   | Obs |
|------|------|------|-------|-----|
| 0.84 | 5.13 | 0.00 | 32.00 | 760 |

**k10\_s33: Child's Spouse**

| Mean | SD   | Min  | Max   | Obs |
|------|------|------|-------|-----|
| 0.52 | 4.12 | 0.00 | 33.00 | 760 |

**k10\_s34: Child's Spouse**

| Mean | SD   | Min  | Max   | Obs |
|------|------|------|-------|-----|
| 0.13 | 2.13 | 0.00 | 34.00 | 760 |

**k10\_s35: Child's Spouse**

| Mean | SD   | Min  | Max   | Obs |
|------|------|------|-------|-----|
| 0.14 | 2.20 | 0.00 | 35.00 | 760 |

**k10\_s36: Child's Spouse**

| Mean | SD   | Min  | Max   | Obs |
|------|------|------|-------|-----|
| 0.09 | 1.85 | 0.00 | 36.00 | 760 |

**k10\_s37: Child's Spouse**

| Mean | SD   | Min  | Max   | Obs |
|------|------|------|-------|-----|
| 0.10 | 1.90 | 0.00 | 37.00 | 760 |

**k10\_s38: Child's Spouse**

| Mean | SD   | Min  | Max  | Obs |
|------|------|------|------|-----|
| 0.00 | 0.00 | 0.00 | 0.00 | 760 |

**k10\_s39: Child's Spouse**

| Mean | SD   | Min  | Max  | Obs |
|------|------|------|------|-----|
| 0.00 | 0.00 | 0.00 | 0.00 | 760 |

**k10\_s40: Child's Spouse**

| Mean | SD   | Min  | Max  | Obs |
|------|------|------|------|-----|
| 0.00 | 0.00 | 0.00 | 0.00 | 760 |

**k10\_s41: Child's Spouse**

| Mean | SD   | Min  | Max  | Obs |
|------|------|------|------|-----|
| 0.00 | 0.00 | 0.00 | 0.00 | 760 |

**k10\_s42: Child's Spouse**

| Mean | SD   | Min  | Max  | Obs |
|------|------|------|------|-----|
| 0.00 | 0.00 | 0.00 | 0.00 | 760 |

**k10\_s43: Child's Spouse**

| Mean | SD   | Min  | Max  | Obs |
|------|------|------|------|-----|
| 0.00 | 0.00 | 0.00 | 0.00 | 760 |

**k10\_s44: Child's Spouse**

| Mean | SD   | Min  | Max  | Obs |
|------|------|------|------|-----|
| 0.00 | 0.00 | 0.00 | 0.00 | 760 |

**k10\_s45: Child's Spouse**

| Mean | SD   | Min  | Max  | Obs |
|------|------|------|------|-----|
| 0.00 | 0.00 | 0.00 | 0.00 | 760 |

**k10\_s46: Child's Spouse**

| Mean | SD   | Min  | Max  | Obs |
|------|------|------|------|-----|
| 0.00 | 0.00 | 0.00 | 0.00 | 760 |

**k10\_s47: Child's Spouse**

| Mean | SD   | Min  | Max  | Obs |
|------|------|------|------|-----|
| 0.00 | 0.00 | 0.00 | 0.00 | 760 |

**k10\_s48: Child's Spouse**

| Mean | SD   | Min  | Max  | Obs |
|------|------|------|------|-----|
| 0.00 | 0.00 | 0.00 | 0.00 | 760 |

**k10\_s49: Child's Spouse**

| Mean | SD   | Min  | Max  | Obs |
|------|------|------|------|-----|
| 0.00 | 0.00 | 0.00 | 0.00 | 760 |

**k10\_s50: Child's Spouse**

| Mean | SD   | Min  | Max  | Obs |
|------|------|------|------|-----|
| 0.00 | 0.00 | 0.00 | 0.00 | 760 |

**k10\_s51: Child's Spouse**

| Mean | SD   | Min  | Max  | Obs |
|------|------|------|------|-----|
| 0.00 | 0.00 | 0.00 | 0.00 | 760 |

**k10\_s52: Grandson**

| Mean | SD   | Min  | Max   | Obs |
|------|------|------|-------|-----|
| 1.98 | 9.97 | 0.00 | 52.00 | 760 |

**k10\_s53: Granddaughter**

| Mean | SD   | Min  | Max   | Obs |
|------|------|------|-------|-----|
| 1.05 | 7.38 | 0.00 | 53.00 | 760 |

**k10\_s54: Relatives**

| Mean | SD    | Min  | Max   | Obs |
|------|-------|------|-------|-----|
| 3.34 | 13.02 | 0.00 | 54.00 | 760 |

**k10\_s55: R's Union**

| Mean | SD   | Min  | Max   | Obs |
|------|------|------|-------|-----|
| 0.87 | 6.86 | 0.00 | 55.00 | 760 |

**k10\_s56: R's Insurance**

| Mean | SD   | Min  | Max   | Obs |
|------|------|------|-------|-----|
| 0.59 | 5.72 | 0.00 | 56.00 | 760 |

**k10\_s57: Other People**

| Mean | SD    | Min  | Max   | Obs |
|------|-------|------|-------|-----|
| 3.15 | 13.03 | 0.00 | 57.00 | 760 |

**k11: Which Child Was the Parent of the Grandchild?**

| Mean | SD   | Min  | Max  | Obs |
|------|------|------|------|-----|
| 1.97 | 1.30 | 1.00 | 6.00 | 30  |

**k13: How Much Money Did R's Family Receive From the Whole Funeral?**

| Mean      | SD        | Min  | Max        | Obs |
|-----------|-----------|------|------------|-----|
| 19,983.78 | 34,567.49 | 0.00 | 400,000.00 | 637 |

**k13\_min: K13\_min**

| A String Variable |     |
|-------------------|-----|
| Obs:              | 123 |

**k13\_max: K13\_max**

| A String Variable |     |
|-------------------|-----|
| Obs:              | 123 |

**exv001: COVID-19 Confirmed Infection**

|       | Freq. | %      |
|-------|-------|--------|
| 2 No  | 196   | 100.00 |
| Total | 196   | 100.00 |

**exv002: Suspected Case**

|                      | Freq. | %      |
|----------------------|-------|--------|
| 1 Yes                | 1     | 0.51   |
| 2 No                 | 194   | 98.98  |
| 999 Refuse to Answer | 1     | 0.51   |
| Total                | 196   | 100.00 |

**exv003: Days of Hospital Stay**

|      | Freq. | %      |
|------|-------|--------|
| 2 No | 1     | 100.00 |

|       |   |        |
|-------|---|--------|
| Total | 1 | 100.00 |
|-------|---|--------|

**exv004\_s1: Travels**

|       | Freq. | %      |
|-------|-------|--------|
| 0 Yes | 196   | 100.00 |
| Total | 196   | 100.00 |

**exv004\_s2: Close contact of COVID cases**

|       | Freq. | %      |
|-------|-------|--------|
| 0 Yes | 196   | 100.00 |
| Total | 196   | 100.00 |

**exv004\_s3: Building Lockdown**

|       | Freq. | %      |
|-------|-------|--------|
| 0 No  | 193   | 98.47  |
| 3 Yes | 3     | 1.53   |
| Total | 196   | 100.00 |

**exv004\_s4: After Going to Hospital**

|       | Freq. | %      |
|-------|-------|--------|
| 0 No  | 195   | 99.49  |
| 4 Yes | 1     | 0.51   |
| Total | 196   | 100.00 |

**exv004\_s5: Tested Positive**

|       | Freq. | %      |
|-------|-------|--------|
| 0 Yes | 196   | 100.00 |
| Total | 196   | 100.00 |

**exv004\_s6: No Quarantine Experience**

|       | Freq. | %      |
|-------|-------|--------|
| 0 No  | 4     | 2.04   |
| 6 Yes | 192   | 97.96  |
| Total | 196   | 100.00 |

**exv004\_s997: Do not Know**

|       | Freq. | %      |
|-------|-------|--------|
| 0 Yes | 196   | 100.00 |
| Total | 196   | 100.00 |

**exv004\_s999: Refuse to Answer**



|       | Freq. | %      |
|-------|-------|--------|
| 0 Yes | 196   | 100.00 |
| Total | 196   | 100.00 |

**exv005: Quarantine Days**

| Mean  | SD    | Min  | Max   | Obs |
|-------|-------|------|-------|-----|
| 31.75 | 21.73 | 7.00 | 60.00 | 4   |

**exv006\_s1: Hospital**

|       | Freq. | %      |
|-------|-------|--------|
| 0 No  | 3     | 75.00  |
| 1 Yes | 1     | 25.00  |
| Total | 4     | 100.00 |

**exv006\_s2: Hotel**

|       | Freq. | %      |
|-------|-------|--------|
| 0 Yes | 4     | 100.00 |
| Total | 4     | 100.00 |

**exv006\_s3: Own Residence**

|       | Freq. | %      |
|-------|-------|--------|
| 0 No  | 1     | 25.00  |
| 3 Yes | 3     | 75.00  |
| Total | 4     | 100.00 |

**exv006\_s4: Others**

|       | Freq. | %      |
|-------|-------|--------|
| 0 Yes | 4     | 100.00 |
| Total | 4     | 100.00 |

**exv006\_s999: Refuse to Answer**

|       | Freq. | %      |
|-------|-------|--------|
| 0 Yes | 4     | 100.00 |
| Total | 4     | 100.00 |

**exv007: Quarantine Co-resident**

|       | Freq. | %      |
|-------|-------|--------|
| 1 Yes | 4     | 100.00 |
| Total | 4     | 100.00 |

**exv008: COVID Tested**

|                      | Freq. | %      |
|----------------------|-------|--------|
| 1 Yes                | 13    | 6.63   |
| 2 No                 | 182   | 92.86  |
| 999 Refuse to Answer | 1     | 0.51   |
| Total                | 196   | 100.00 |

**exv008\_1: COVID Tested Month**

| Mean | SD   | Min   | Max  | Obs |
|------|------|-------|------|-----|
| 3.69 | 2.63 | -1.00 | 7.00 | 13  |

**exv009: Days of Self-isolation**

| Mean  | SD    | Min   | Max    | Obs |
|-------|-------|-------|--------|-----|
| 18.44 | 40.25 | -1.00 | 240.00 | 196 |

**exv010: Treatment Delayed**

|       | Freq. | %      |
|-------|-------|--------|
| 1 Yes | 28    | 14.29  |
| 2 No  | 168   | 85.71  |
| Total | 196   | 100.00 |

**exv011\_s1: 1. No Appointment Could Be Made or Regular Hospital Appointments Were Cancelled**

|       | Freq. | %      |
|-------|-------|--------|
| 0 No  | 22    | 78.57  |
| 1 Yes | 6     | 21.43  |
| Total | 28    | 100.00 |

**exv011\_s2: 2. Hospitals Rescheduled All Regular Appointments**

|       | Freq. | %      |
|-------|-------|--------|
| 0 No  | 27    | 96.43  |
| 2 Yes | 1     | 3.57   |
| Total | 28    | 100.00 |

**exv011\_s3: 3. Decided to Wait**

|       | Freq. | %      |
|-------|-------|--------|
| 0 No  | 24    | 85.71  |
| 3 Yes | 4     | 14.29  |
| Total | 28    | 100.00 |

**exv011\_s4: 4. Was Afraid of Going to the Hospital**

|       | Freq. | %      |
|-------|-------|--------|
| 0 No  | 24    | 85.71  |
| 4 Yes | 4     | 14.29  |
| Total | 28    | 100.00 |

**exv011\_s5: 5. Other, Please Specify**

|       | Freq. | %      |
|-------|-------|--------|
| 0 No  | 12    | 42.86  |
| 5 Yes | 16    | 57.14  |
| Total | 28    | 100.00 |

**exv012\_s1: 1. Major Surgery Requiring Hospitalization**

|       | Freq. | %      |
|-------|-------|--------|
| 0 No  | 25    | 89.29  |
| 1 Yes | 3     | 10.71  |
| Total | 28    | 100.00 |

**exv012\_s2: 2. Minor Surgery that Can Be Done on An Outpatient Basis or in A Day**

|       | Freq. | %      |
|-------|-------|--------|
| 0 No  | 26    | 92.86  |
| 2 Yes | 2     | 7.14   |
| Total | 28    | 100.00 |

**exv012\_s3: 3. To See A Doctor for A Regular Outpatient Visit**

|       | Freq. | %      |
|-------|-------|--------|
| 0 No  | 16    | 57.14  |
| 3 Yes | 12    | 42.86  |
| Total | 28    | 100.00 |

**exv012\_s4: 4. To Get Prescription Drugs**

|       | Freq. | %      |
|-------|-------|--------|
| 0 No  | 23    | 82.14  |
| 4 Yes | 5     | 17.86  |
| Total | 28    | 100.00 |

**exv012\_s5: 5. To See A Dentist for Oral Treatment**

|       | Freq. | %      |
|-------|-------|--------|
| 0 No  | 27    | 96.43  |
| 5 Yes | 1     | 3.57   |
| Total | 28    | 100.00 |

**exv012\_s6: 6. Other, Please Specify**

|       | Freq. | %      |
|-------|-------|--------|
| 0 No  | 17    | 60.71  |
| 6 Yes | 11    | 39.29  |
| Total | 28    | 100.00 |

**exv013\_s1: 1. A New Symptom or Disease**

|       | Freq. | %      |
|-------|-------|--------|
| 0 No  | 11    | 91.67  |
| 1 Yes | 1     | 8.33   |
| Total | 12    | 100.00 |

**exv013\_s2: 2. Treatment of An Existing Condition**

|       | Freq. | %      |
|-------|-------|--------|
| 0 No  | 1     | 8.33   |
| 2 Yes | 11    | 91.67  |
| Total | 12    | 100.00 |

**exv013\_s3: 3. Routine Medical Screening**

|       | Freq. | %      |
|-------|-------|--------|
| 0 No  | 10    | 83.33  |
| 3 Yes | 2     | 16.67  |
| Total | 12    | 100.00 |

**exv014\_s1: 1. Due to Confirmed Infection with COVID-19**

|       | Freq. | %      |
|-------|-------|--------|
| 0 Yes | 196   | 100.00 |
| Total | 196   | 100.00 |

**exv014\_s2: 2. Unable to Have Timely Access to Routine Medical Care**

|       | Freq. | %      |
|-------|-------|--------|
| 0 No  | 180   | 91.84  |
| 2 Yes | 16    | 8.16   |
| Total | 196   | 100.00 |

**exv014\_s3: 3. Unable to Receive Emergency Treatment in Time**

|       | Freq. | %      |
|-------|-------|--------|
| 0 No  | 190   | 96.94  |
| 3 Yes | 6     | 3.06   |
| Total | 196   | 100.00 |

**exv014\_s4: 4. Unable to Receive Care and Attention**

|       | Freq. | %      |
|-------|-------|--------|
| 0 No  | 191   | 97.45  |
| 4 Yes | 5     | 2.55   |
| Total | 196   | 100.00 |

**exv014\_s5: 5. Accident Caused by the Pandemic**

|       | Freq. | %      |
|-------|-------|--------|
| 0 Yes | 196   | 100.00 |
| Total | 196   | 100.00 |

**exv014\_s6: 6. Other Reasons, Please Specify**

|       | Freq. | %      |
|-------|-------|--------|
| 0 No  | 194   | 98.98  |
| 6 Yes | 2     | 1.02   |
| Total | 196   | 100.00 |

**exv014\_s7: 7. Not Related to the Pandemic**

|       | Freq. | %      |
|-------|-------|--------|
| 0 No  | 18    | 9.18   |
| 7 Yes | 178   | 90.82  |
| Total | 196   | 100.00 |

**ex005: Relationship to the Deceased?**

|                  | Freq. | %      |
|------------------|-------|--------|
| 1 Father         | 101   | 13.22  |
| 2 Mother         | 104   | 13.61  |
| 3 Spouse         | 279   | 36.52  |
| 4 Sibling        | 15    | 1.96   |
| 5 Other Relative | 222   | 29.06  |
| 6 No Relation    | 43    | 5.63   |
| Total            | 764   | 100.00 |

**xezdisease\_1\_: Cancer**

|       | Freq. | %      |
|-------|-------|--------|
| 1 Yes | 51    | 100.00 |
| Total | 51    | 100.00 |

**xezdisease\_2\_: Chronic Lung Diseases**

|       | Freq. | %      |
|-------|-------|--------|
| 1 Yes | 170   | 100.00 |
| Total | 170   | 100.00 |

**xezdisease\_3\_:** Heart Diseases

|       | Freq. | %      |
|-------|-------|--------|
| 1 Yes | 195   | 100.00 |
| Total | 195   | 100.00 |

**xezdisease\_4\_:** Stroke

|       | Freq. | %      |
|-------|-------|--------|
| 1 Yes | 122   | 100.00 |
| Total | 122   | 100.00 |

**xezdisease\_5\_:** Emotional Problems

|       | Freq. | %      |
|-------|-------|--------|
| 1 Yes | 38    | 100.00 |
| Total | 38    | 100.00 |

**xechrodistype\_1\_:** Disease[1]

| A String Variable |  |     |
|-------------------|--|-----|
| Obs:              |  | 762 |

**xechrodistype\_2\_:** Disease[2]

| A String Variable |  |     |
|-------------------|--|-----|
| Obs:              |  | 762 |

**xechrodistype\_3\_:** Disease[3]

| A String Variable |  |     |
|-------------------|--|-----|
| Obs:              |  | 762 |

**xechrodistype\_4\_:** Disease[4]

| A String Variable |  |     |
|-------------------|--|-----|
| Obs:              |  | 762 |

**xechrodistype\_5\_:** Disease[5]

| A String Variable |  |     |
|-------------------|--|-----|
| Obs:              |  | 762 |

**xedisease\_3\_:** Heart Diseases

|  | Freq. | % |
|--|-------|---|
|--|-------|---|

|       |     |        |
|-------|-----|--------|
| 1 Yes | 281 | 36.88  |
| 2 No  | 481 | 63.12  |
| Total | 762 | 100.00 |

**xedisease\_1\_:** Cancer

|       | Freq. | %      |
|-------|-------|--------|
| 1 Yes | 189   | 24.80  |
| 2 No  | 573   | 75.20  |
| Total | 762   | 100.00 |

**xedisease\_4\_:** Stroke

|       | Freq. | %      |
|-------|-------|--------|
| 1 Yes | 158   | 20.73  |
| 2 No  | 604   | 79.27  |
| Total | 762   | 100.00 |

**xehelperselect:** Have Helper or Not

|       | Freq. | %      |
|-------|-------|--------|
| 0 No  | 225   | 29.53  |
| 1 Yes | 537   | 70.47  |
| Total | 762   | 100.00 |

**xehelpernum:** Number of Helpers

| Mean | SD   | Min  | Max   | Obs |
|------|------|------|-------|-----|
| 3.54 | 3.62 | 1.00 | 26.00 | 537 |

**xeselectnum:** Numbers Selected

| Mean | SD   | Min  | Max  | Obs |
|------|------|------|------|-----|
| 7.00 | 0.00 | 7.00 | 7.00 | 68  |

**xck\_exf005:** Value of exf005

| Mean     | SD       | Min  | Max       | Obs |
|----------|----------|------|-----------|-----|
| 2,088.71 | 8,596.72 | 0.00 | 84,000.00 | 760 |

**xck\_exf007:** Value of exf007

| Mean     | SD        | Min  | Max        | Obs |
|----------|-----------|------|------------|-----|
| 4,804.60 | 22,597.84 | 0.00 | 400,000.00 | 760 |

**xck\_exf009:** Value of exf009

| Mean   | SD       | Min  | Max        | Obs |
|--------|----------|------|------------|-----|
| 973.75 | 8,470.36 | 0.00 | 185,000.00 | 760 |

**xck\_exf011:** Value of exf011

| Mean   | SD       | Min  | Max        | Obs |
|--------|----------|------|------------|-----|
| 583.82 | 6,463.40 | 0.00 | 150,000.00 | 760 |

**xck\_exf013:** Value of exf013

| Mean   | SD       | Min  | Max       | Obs |
|--------|----------|------|-----------|-----|
| 125.66 | 2,062.35 | 0.00 | 50,000.00 | 760 |

**xck\_exe006:** Value of exe006

| Mean     | SD        | Min  | Max        | Obs |
|----------|-----------|------|------------|-----|
| 1,375.24 | 16,505.33 | 0.00 | 400,000.00 | 760 |

**xck\_exg010:** Value of exg010

| Mean     | SD        | Min  | Max        | Obs |
|----------|-----------|------|------------|-----|
| 2,401.93 | 23,543.48 | 0.00 | 600,000.00 | 760 |

**xck\_exg012:** Value of exg012

| Mean     | SD        | Min  | Max        | Obs |
|----------|-----------|------|------------|-----|
| 8,085.43 | 42,826.44 | 0.00 | 600,000.00 | 760 |

**xck\_exg014:** Value of exg014

| Mean  | SD       | Min  | Max       | Obs |
|-------|----------|------|-----------|-----|
| 54.61 | 1,147.82 | 0.00 | 30,000.00 | 760 |

**xck\_exg016:** Value of exg016

| Mean     | SD        | Min  | Max        | Obs |
|----------|-----------|------|------------|-----|
| 1,741.51 | 10,432.73 | 0.00 | 150,000.00 | 760 |

**xck\_exg017:** Value of exg017

| Mean  | SD     | Min  | Max       | Obs |
|-------|--------|------|-----------|-----|
| 46.73 | 666.85 | 0.00 | 14,000.00 | 760 |

**xexgtotalvalue:** Total Value of Estate without Housing



| Mean      | SD        | Min  | Max        | Obs |
|-----------|-----------|------|------------|-----|
| 22,281.98 | 67,375.75 | 0.00 | 800,000.00 | 760 |

versionID: Version ID

| A String Variable |     |
|-------------------|-----|
| Obs:              | 770 |

*This page intentionally left blank*

MODULE **AUX1**

**Sample Information**

**ID:** Individual ID

|                   |  |        |
|-------------------|--|--------|
| A String Variable |  |        |
| Obs:              |  | 20,180 |

**householdID:** Household ID

|                   |  |        |
|-------------------|--|--------|
| A String Variable |  |        |
| Obs:              |  | 20,180 |

**communityID:** Community ID

|                   |  |        |
|-------------------|--|--------|
| A String Variable |  |        |
| Obs:              |  | 20,180 |

**died:** Whether Individual Died

|         |        |        |
|---------|--------|--------|
|         | Freq.  | %      |
| 0 Alive | 19,395 | 96.11  |
| 1 Died  | 785    | 3.89   |
| Total   | 20,180 | 100.00 |

**crossection:** Whether Cross-Section Sample

|       |        |        |
|-------|--------|--------|
|       | Freq.  | %      |
| 0 No  | 2,816  | 13.95  |
| 1 Yes | 17,364 | 86.05  |
| Total | 20,180 | 100.00 |

**iyear:** Interview Year

|                   |  |        |
|-------------------|--|--------|
| A String Variable |  |        |
| Obs:              |  | 20,180 |

**imonth:** Interview Month

|                   |  |        |
|-------------------|--|--------|
| A String Variable |  |        |
| Obs:              |  | 20,180 |

**versionID:** Version ID

|                   |  |        |
|-------------------|--|--------|
| A String Variable |  |        |
| Obs:              |  | 20,180 |

---

## Sampling Weights

---

**ID:** Individual ID

|                   |        |
|-------------------|--------|
| A String Variable |        |
| Obs:              | 17,364 |

**householdID:** Household ID

|                   |        |
|-------------------|--------|
| A String Variable |        |
| Obs:              | 17,364 |

**communityID:** Community ID

|                   |        |
|-------------------|--------|
| A String Variable |        |
| Obs:              | 17,364 |

**HH\_weight:** Household Base Weight

| Mean      | SD        | Min      | Max          | Obs    |
|-----------|-----------|----------|--------------|--------|
| 28,854.24 | 39,583.01 | 4,532.62 | 1,206,623.84 | 17,364 |

**HH\_weight\_ad1:** Household Weight with Household Response Adjustment

| Mean      | SD        | Min      | Max          | Obs    |
|-----------|-----------|----------|--------------|--------|
| 33,097.53 | 61,473.05 | 4,753.04 | 2,414,264.56 | 17,364 |

**INDV\_weight:** Individual Base Weight

| Mean      | SD        | Min      | Max          | Obs    |
|-----------|-----------|----------|--------------|--------|
| 32,371.69 | 35,234.57 | 7,370.20 | 1,178,908.25 | 17,364 |

**INDV\_weight\_ad2:** Individual Weight with Household and Individual Response Ad-

**justment**

| Mean      | SD        | Min      | Max          | Obs    |
|-----------|-----------|----------|--------------|--------|
| 37,468.96 | 45,991.97 | 7,660.46 | 1,446,489.24 | 17,364 |

**versionID: Version ID**

| A String Variable |        |
|-------------------|--------|
| Obs:              | 17,364 |
